# Supplementary material for: Activation of GCN2 kinase by ribosome stalling links translation elongation with translation initiation
Source: eLife. 2016 Apr 16;5:e14295. doi: 10.7554/eLife.14295 (PMC4917338; doi:10.7554/eLife.14295)
Supplement: Figure 1—source data 1. — DOI: http://dx.doi.org/10.7554/eLife.14295.004 [file elife-14295-fig1-data1.xlsx]

## Sheet: Gene list
Figure 1 -Source Data 1. List of significantly changed genes between the B6J and the B6J-nmf205-/- cerebellum and hippocampus. See Figure 1.
Significantly upregulated and downregulated genes (1016 genes)
Upregulated genes in B6-nmf205-/- brain (648 genes)				Downregulated genes in B6J-nmf205-/- brain (368 genes)
3W Cb (225 genes)	5W Cb (583 genes)	3W Hp (10 genes)	5W Hp (78 genes)	3W Cb (100 genes)	5W Cb (327 genes)	3W Hp (1 gene)	5W Hp (26 genes)
Slc7a3	Cst7	Slc7a3	Slc7a3	Bclp2	Pappa	Gtpbp2	Zcchc5
Sesn2	Ccl3	Mthfd2	Mthfd2	Stap2	Bclp2		Akr1c18
Kcnt2	Serpina3n	Chac1	Chac1	Airn	Gm10048		Tdo2
Mthfd2	Slc7a3	Cox6a2	Cyb5r1	Mybpc3	Vipr2		Lct
Ddr2	Fcrls	Cars	Cox6a2	Tnc	Svep1		Ntf3
Aldh1l2	Tyrobp	Slc7a1	Trim66	Car9	Stap2		6330527O06Rik
A830018L16Rik	Lyz2	Asns	Aldh1l2	Svep1	Cerkl		Hapln1
Chac1	Spp1	Atf4	Sesn2	Gm10048	Plk5		Fxyd7
Nr4a1	Fam129a	Slc1a4	Ddr2	Vipr2	Ptpn22		Npy2r
Cox6a2	Ly86	Psph	Shmt2	Ldoc1	Ldoc1		Cpne9
2900055J20Rik	Ddr2		Stc2	Aifm3	Tbata		Gtpbp2
Cyb5r1	C1qc		Ddit3	Adamts10	C230081A13Rik		Htr2a
Gdf15	Cd180		Slc7a1	Ror1	Gm1332		Olfr46
Stc2	Cd68		1700028P14Rik	Pappa	Dnahc11		Ano3
Trim66	A830018L16Rik		A930018M24Rik	Tyro3	Ror1		Sphkap
Cacng3	Cd52		Eif4ebp1	Phxr4	Mybpc3		Npnt
Fos	C1qb		Aldh18a1	Necab3	Airn		Krt73
4930486G11Rik	Cox6a2		Cars	Scnn1g	Abcc8		Ubash3b
Paqr3	Stc2		Slc1a4	Gpr22	Cacna1e		Plekha2
Fam129a	Gpnmb		Asns	Ldlr	Aifm3		Mfsd4
Reep6	Kcnt2		1810010H24Rik	Ano3	Abca8b		Yjefn3
Slc7a1	C3ar1		Slc7a5	Rnf152	1110032A04Rik		3110082D06Rik
Shmt2	Chac1		Pycr1	6430571L13Rik	Gpr22		Trpc6
Cyb5r2	C1qa		Herpud1	9030425E11Rik	Ccnjl		Olfr539
Slc1a4	Cacng3		Ifit3	C230081A13Rik	Scx		Gm9753
Eif4ebp1	Fcer1g		Psph	Atp2b4	Kcnt1		Rfx3
Zcchc12	Sesn2		Fibin	Ryr3	Adamts10
Nupr1	Itgax		Tc2n	Cerkl	Mrgprf
Asns	Zcchc12		Cdkn1a	Tesc	Rnf152
Fbln5	Gfap		4930486G11Rik	Kcnt1	Sidt1
Pycr1	Cyb5r1		Dleu7	Trhde	Tll1
Aldh18a1	Laptm5		Hmox1	Ccdc120	Trhde
Nr4a2	Ctss		Nars	Pisd-ps1	Cdh15
Phf10	Mpeg1		Gars	Cacna1e	Mir344
Slc16a14	Reep6		Iars	Slc29a4	Gm10118
Atf3	Clec7a		Lars	Kif26b	Cntnap4
Cars	Ccl6		Mars	Pip5k1b	9330155M09Rik
Slc7a5	Mthfd2		Atf3	Mical2	Wscd2
Gm129	Cyb5r2		Slc7a11	Tbata	Tle2
Adm2	Cd53		Atf4	Arhgef3	Rims1
Kctd16	2900055J20Rik		Fos	Cabp2	Galnt7
Spry4	Nupr1		Rtp4	1110032A04Rik	Camkk2
Slc7a11	Trim66		Fam129a	Sla	Camk4
Xpot	Fbln5		C4b	Cntnap1	Kcnk10
Gars	Hexb		Phf10	Slc2a6	Mapk12
Arhgef2	C4b		1700007K13Rik	Rgl3	Slco2a1
Nr4a3	Lgals3bp		Cyb5r2	Mir27b	Tnc
2700007P21Rik	Ifit3		Thbs4	Adam11	Olfm3
Dusp4	Paqr3		Sars	Mus81	Kif26b
Fibin	Emr1		Zcchc12	Mgst3	Cdon
Sstr2	Ifit1		Slc16a14	Ccdc74a	Acpl2
Ccl3	Slc7a11		Fbln5	Mmp23	Ccdc120
Lars	Fcgr3		Slc6a9	Gcnt1	Sla
Cd93	Gdf15		Yars	Kcnk10	Rnf112
Trib3	Cxcl10		Syde1	Abca8b	Ano3
1810010H24Rik	4930486G11Rik		Tars	Abcc8	Epha3
Herpud1	Fcgr2b		Nupr1	Phactr3	Ryr3
Nup62	Cd74		Xpot	Rims1	Mir27b
Vegfa	Slc1a4		Prelp	Sidt1	Cnksr3
Tars	Slc7a1		Txnip	Dpysl4	Ndst3
Gpt2	Ctsc		1700003M02Rik	Galnt7	Tiam1
Cyr61	Ccl9		Dnahc6	Flrt3	Mir690
Mknk1	Cdkn1a		Dhrs7	Maml2	6430571L13Rik
Rcc2	Phf10		Crabp1	Igsf9b	Aqp6
Ezr	Oasl2		Prrg4	Cytsb	Boc
Yars	Glra1		Leprotl1	Inadl	Grin2a
Cebpg	Shmt2		Capsl	Dio2	Car9
Fcrls	Spata1		Ak7	Tle2	Gpr137c
Spata1	Olfml3		Phgdh	Car4	Slc29a4
Slc40a1	Tgtp1		Eif2s2	Cdon	Slitrk4
Iars	Aldh1l2		Hspa9	Gpr137c	Car4
Npas4	Nckap1l		Ttc18	Mir384	Kcnj6
Cdkn1a	Irgm1		Scpep1	Ccdc63	Als2
Leprotl1	Pld4		Trem3	Olfm3	Prrt2
Mars	Slc43a3		Tm4sf1	Mir690	Tmem132c
Atf5	Hmox1		Psat1	Cdh15	Cntnap1
Sars	Tlr7		Abca1	Zfp467	Mmp23
Psph	Cd84		Rsph4a	Plcxd3	Speg
Eif2s2	Atp6v0d2			Stard4	D17H6S56E-3
Ddit3	Csf1r			Samd14	Adam11
Hspa9	Fibin			Camkk2	Tmem145
Mtbp	Olfr111			Eno2	Cadps2
Kcns2	Cx3cr1			Scx	Slc15a2
Sox11	Slc16a14			Gm10403	Epb4.1l4b
Hmox1	A730017C20Rik			Rabgap1l	Exph5
Cth	Ecm2			Clic1	Slc16a11
Ly86	Trem2			Plin2	Gpr52
Gm5246	H2-Aa			Plch2	Gabra6
Ecm2	Mamdc2			E530001K10Rik	Tbc1d8
Psat1	Syt5			Mir382	Pip5k1b
Nars	Rasgrf2			Grk5	Nos1
Prr15	AI607873			Nt5c1a	Gm996
Serpina3n	Adm2			B930041F14Rik	Grin2c
Kdr	Slc7a5			Abca7	Necab3
Slc3a2	Tac1			Gm3893	D8Ertd82e
Cd68	Hpgds			Gap43	Rnf148
Eif3c	Cd93			Opn3	Barhl2
Clic4	Ifitm3			Mpp7	Rgl3
Vstm2a	Tlr13			Fam135b	Mir384
Agxt2l1	Rtp4			Gpr68	AI118078
Chd5	Cd34				Tmem132a
Pabpc1l2b	H2-K1				Ppfia4
A730017C20Rik	Cd24a				Rims2
Cldn5	Asns				Unc13c
Eprs	Cd33				Kcnh1
Mpeg1	Cth				Ltbp2
Mir135a-2	Kctd16				Cntn6
Extl1	Acot2				4930578G10Rik
A3galt2	Atf3				Jph4
Tyrobp	Pdzd7				Inadl
Atf4	Xpot				Tesc
Etv5	Ctsz				Kcnc1
Ftsjd1	Ctsh				Cdh8
C1qc	Timp2				Plch2
Aplnr	Fos				Bmp1
Phgdh	Rcc2				Echdc2
Nop58	Anxa3				Grm4
Lgr5	Nrp1				Reln
Cd34	1810010H24Rik				Xkr6
A930018M24Rik	Nr4a1				Kcnd2
Slco1c1	Arhgdib				Ccng2
Akna	Aldh18a1				6530402D11Rik
Trp53	Unc93b1				Phxr4
Nfil3	Ezr				Zfp467
Bdnf	Sfpi1				Cytsb
Ifit3	Fmod				Kirrel3
Gpx3	Eif4ebp1				D0H4S114
Abca1	Gars				Igsf21
4930467E23Rik	Ctsd				AY512949
Trank1	Trim30				Tyro3
Bcl6b	Cyba				Mirg
Stard5	Agxt2l1				Ncrna00085
Lrrc8d	Mafb				Samd14
Ctla2a	I830012O16Rik				Ryr2
Fosl2	Tgfbr1				Tmem178
Il2rg	Ly96				Slc8a2
C1qb	Gbp2				Plcxd3
Slc6a11	Lgals9				Mir23b
Ephx3	Il2rg				Cdc42bpg
Cyyr1	Lmo3				Cnpy1
Nup43	Tars				Synpr
Usp36	Lag3				Rabgap1l
Nrg3	Apoc1				Neurod1
Hist1h2ak	Aspn				Dpysl4
Hax1	Osmr				C230004F18Rik
Acot2	Cd63				Gm10403
Aars	Sstr2				Fam135b
AF529169	Psat1				Lypd6
Otub2	Chi3l1				Mical2
Dhrs7	Igf1				Igsf9b
Emcn	Gbp4				Crtam
Lyz2	6330403K07Rik				Syne1
Mthfd1l	Phgdh				Xk
Cst7	Zdbf2				Ypel4
Fam84b	Pycr1				Kcnj12
Gpr137b-ps	Lect1				Tbc1d25
Cry1	Casp8				Stxbp5l
Npc1l1	Gm129				Ppargc1b
Gpr165	Entpd1				9830001H06Rik
Pecam1	Gpr165				Abca7
Amy1	Scn3b				Gas7
Atxn2l	Herpud1				Fstl5
Prnd	Inpp5d				4933415A04Rik
Lmo4	Irgm2				Mir505
Rps6ka2	Gm8995				Fzd7
Rgs5	Pcdh11x				Tpcn2
Anxa3	Kcns2				Pde1c
Zdbf2	Lpl				Pard6g
Itm2a	Pabpc1l2b				2900092E17Rik
Lmo3	Ifit2				Cnnm4
Slc16a4	Mknk1				Pik3r3
Per2	Itgam				C130030K03Rik
Laptm5	Slc40a1				Coro2a
Kctd15	Pros1				Rapgef4
Cd180	Car5b				1110012J17Rik
Slc43a3	Emcn				Ak3l1
Syt5	2700007P21Rik				Usp3
Dbpht2	Gpr137b-ps				Neurl1a
Ucp2	AI451617				Adrbk2
Nxph4	Fyb				Btg1
Gfap	Plau				Kcnj9
Sema3c	Sema3c				Abcc12
Nol8	Rasgrp3				Klhl3
Isg20	Mal2				Cdh7
Rad54l	Gm5246				Caln1
Isoc1	Lars				Mctp1
Pglyrp1	P2ry13				Grb7
Gm10694	Usp18				E330009J07Rik
Igfbp7	Lpcat2				Scnn1g
Lgals3bp	Hexa				Chrd
Tmem179	Vstm2a				Dixdc1
Esam	Cars				1700086D15Rik
Dach2	Ms4a6c				Alms1
Etf1	Pgm5				Mir377
Slc9a9	Txnip				Flrt3
Nrp1	Cyth4				Slc2a6
BC028528	Cd9				Tmem25
Basp1	Kcnj2				Phyhip
Slco1a4	Id3				Dusp16
Gpr98	Ddit3				6430573F11Rik
Fgf16	Ddx58				Cacna1c
Nkd1	Plek				Syt12
Fam46c	AW551984				Rnf133
Gm11517	Abca1				Mir340
Ssbp2	Tmem176a				A2bp1
Adh1	Gpx3				Galnt13
2310014L17Rik	Gabrq				Pld5
Ppp2r5a	Blnk				Mir30b
Ccdc11	Fam46c				Adcy1
Slfn5	Chd5				Spag1
1700028P14Rik	Isoc1				Gpr68
Cnn2	Hspa9				Pgm2l1
Nsg2	Slfn5				Nedd4l
Hexb	Mpa2l				AI428936
Tm6sf2	Meis2				Pkib
Mcm8	Tnfsf10				Odz1
Lonp1	Eif3c				Pclo
Tek	Akna				Stat2
Fn1	Sp100				Ldlr
Fli1	Glra3				Nrg2
Nampt	Clec5a				Naaladl2
Art3	Leprotl1				Rnf123
Ly6g	Yars				Zfp385b
Cdh10	Sox11				9030425E11Rik
Pcdh18	9930111J21Rik2				Dpp6
	Gng5				Appl2
	Cfh				Ablim1
	Nup62				Arhgap10
	Pcdh18				Bat5
	Gbp3				Mpp3
	Ang				Rif1
	Casp12				Dab2ip
	Slc6a11				Lrrc4
	Acsl5				Mir382
	Gpr84				Pnpla3
	Rassf4				Ntn4
	Otub2				St3gal2
	Itm2a				Mir487b
	Nov				Mirlet7e
	Slco1a4				4931406H21Rik
	Clic4				Mapk11
	Atp13a5				Zmynd8
	Gpt2				Zfyve28
	Nbl1				Foxn2
	Kcnc2				Bend6
	Tmem100				Il1rapl1
	Peg10				Ccdc63
	Lcp1				Fam131b
	Nars				Ptchd1
	Il13ra1				Plekha5
	Psph				Tead4
	Cd72				Stard4
	Cd86				St8sia5
	Gabrg3				Kndc1
	Odz3				Cited2
	Tgif1				Spock1
	Arpc1b				Mir300
	Nt5dc2				Kcnk9
	Serpinf1				Gm3893
	Vegfa				Gprc5c
	Slc17a6				Ccl21a
	Htr2c				Epn3
	1700007K13Rik				Erc1
	Timp1				Adamts18
	AW112010				Sh3bgr
	Hvcn1				Ralyl
	Fxyd5				Phactr3
	Abcg2				Plekho1
	Calcrl				Slc9a5
	Eltd1				Mir369
	Nsg2				Mir134
	Rpp25				Mir485
	Slc11a1				Rab15
	Eif2s2				Tmem108
	Srgn				Hr
	Rnf213				Syt2
	Itpkb				Ephb2
	Plscr2				Scn2a1
	Tek				Syt9
	Tmem179				Car10
	Glra2				Cbln1
	Dab2				Sgpp2
	BC028528				Sphkap
	Basp1				Cdkl5
	Tmem176b				Gabrd
	Iars				Pms1
	Dgkk				Agap2
	Npl				St3gal5
	Fnbp1l				Maml2
	Xlr				Mir380
	Scpep1				Svop
	Vat1				Slc35f3
	Itga6				Fat2
	Cyyr1				Sh2d3c
	B2m				Mtus2
	Xaf1				Tmem229b
	Nostrin				Fbxl22
	A230006K03Rik				Tecpr1
	Grn				D930030D11Rik
	Ogn				Zc3h6
	Myc				Ankrd34a
	Rps6ka2				Prosapip1
	Lilrb4				Serpinb2
	Serpine2				Zfp521
	Nfil3				Gap43
	Samsn1				Srrm4
	Gpr98				Odf2
	Ifih1				Sebox
	Fli1				Porcn
	Apcdd1				Tmem201
	Zfp36l1				Lrrc3b
	Cdh10				Tm7sf2
	H2-Ab1				Mir181b-1
	Trib3				St18
	Adap2				Car15
	Gsto1				Il20rb
	Nnat				C530030P08Rik
	Tekt5				Diras2
	Dock2				Tmtc4
	Nop58				Ccdc74a
	Slc39a12				Cecr2
	Apobec1				Dact1
	Cd97				Tgm5
	Hist1h2ak				Atp2b3
	Tm4sf1				Sh3glb2
	Cldn5				Galnt9
	Herc5				Ankrd56
	Cebpg
	Fosb
	Trp53
	Padi2
	Slco1c1
	Trim12
	Nup43
	Il10rb
	Cpne6
	Cp
	Gpr116
	Eprs
	Stard5
	Hist1h1c
	Gm6394
	Slc3a2
	Prelp
	Abhd4
	Soat1
	Rgs10
	Ptpro
	Rgs4
	Crip2
	Ly6a
	Tbxas1
	Efemp1
	Hpgd
	AF529169
	Vwa5a
	Gm5502
	Ass1
	Resp18
	Gpr137b
	P2ry6
	Slc9a9
	Clvs2
	Odz4
	Vgf
	Nudt11
	Dhrs7
	Slco2b1
	Plp2
	Lmo4
	Gpx8
	Ifi44
	Csf1
	Depdc6
	Cnn2
	Hap1
	Kcnh5
	Slc2a4
	Nudt10
	Ucp2
	Mgst1
	Lair1
	Ldb2
	Wdr17
	Thbs1
	Cdh5
	Selplg
	Mustn1
	Phyhd1
	Hrsp12
	Npas2
	Evi2a
	Agt
	Gm7691
	Nkd1
	Atf4
	Capg
	Rin2
	Ostn
	Cbln2
	Rbp4
	Prl2c3
	Esam
	Tor3a
	Abcb1a
	Prkch
	Il33
	Sars
	Chrna4
	Chrm3
	Camkv
	Aqp4
	Wars
	Gvin1
	S1pr3
	Prcp
	1700048O20Rik
	Pqlc3
	Lonp1
	Epb4.1l2
	Plagl1
	4632428N05Rik
	Gca
	1700028P14Rik
	Itgb2
	Tlr3
	Myl9
	Neto1
	Ctla2a
	Gabra3
	Extl1
	Fam19a1
	Ccdc3
	Kctd4
	Nxph4
	Vav1
	St8sia6
	Nfe2l2
	Lrrc8d
	Sulf1
	Gm885
	Gm8936
	Slit2
	Tspan6
	Klhl6
	Pamr1
	Kcnk6
	Cmbl
	Rrs1
	Cachd1
	Gng4
	Clec2d
	Gfra1
	Cpxm2
	Tprkb
	Odc1
	Chrm2
	Ceacam1
	Trim25
	Ptges
	Bhlhe41
	Dbpht2
	Ppp2r5a
	Myof
	Rxrg
	Gusb
	Cd37
	Sema3d
	H2-DMa
	Gm12643
	Gm6548
	Maob
	Gm15470
	Hax1
	Suclg2
	Itga1
	AI504432
	Apoe
	Pecam1
	Bmp2k
	Tcn2
	Ctxn1
	Tanc2
	Ifi27l1
	D830030K20Rik
	Slc7a2
	Arhgef2
	Stab1
	Palmd
	Itih5
	Cd38
	Rgs5
	Vcam1
	Stxbp6
	Lcp2
	Th
	Soat2
	Mir135a-2
	Tcfap2d
	Lrrc7
	Pex11a
	Gm11275
	Irf8
	Necab2
	Slit1
	Gm3696
	Sncg
	Csf3r
	Tgfbr2
	Pxdn
	Mars
	Naf1
	5430435G22Rik
	Gbp6
	Dtx3l
	Mina
	Anxa4
	Tbrg1
	Slc14a1
	Nop14
	Lmo2
	Prkar2b
	Axl
	Gm10561
	Smyd5
	Pid1
	Glce
	Igfbp7
	Pam
	Ednrb
	Hmgcs2
	Irf7
	Rimklb
	Cxadr
	Bgn
	Tshz2
	Podxl
	Srebf1
	Ccdc141
	Zkscan16
	St6galnac5
	Fam189a2
	Lipa
	Frmd4b
	Gm10406
	Kcne1l
	Arhgap29
	Cav1
	Mtbp
	Gm11277
	Meig1
	Thbd
	Gpr56
	Lbh
	Tgfb1
	Pln
	Bche
	Qpct
	Mir703
	Cxcl16
	Serpinb9
	Cyr61
	Pon3
	Lap3
	Sv2c
	Sft2d2
	Tmem140
	Fmo1
	P2ry14
	Tnfaip6
	P2ry12
	Pnp
	Lgi2
	Slc25a18
	Dus4l
	4930555G01Rik
	Isg20
	Phlda3
	Naip5
	Pcdh19
	Ifi30
	Pllp
	Sh3kbp1

## Sheet: Relative fold change
Figure 1--Source Data 1. Relative fold change of significantly changed genes. See Figure 1.
Upregulated genes in B6J-nmf205-/- brain (648 genes)									Downregulated genes in B6J-nmf205-/- brain (368 genes)
	3W Cb		5W Cb		3W Hp		5W Hp			3W Cb		5W Cb		3W Hp		5W Hp
Symbol	RFC	q-value	RFC	q-value	RFC	q-value	RFC	q-value	Symbol	RFC	q-value	RFC	q-value	RFC	q-value	RFC	q-value
Cst7	1.60869	0.00195034	19.0963	0.000358259	1.17011	0.310651	1.24332	0.0818211	Pappa	-1.91963	0.000614176	-4.85973	0.000358259	-1.03725	0.99748	-1.00911	0.892254
Ccl3	2.27847	0.000614176	9.19443	0.000358259	1.31553	0.558476	1.4945	0.0633893	Bclp2	-2.65012	0.000614176	-4.4605	0.000358259	1.2486	0.880473	1.03949	0.825844
Serpina3n	1.84049	0.00441697	9.01887	0.000358259	-1.2442	0.662144	-1.22368	0.204299	Gm10048	-2.2246	0.000614176	-3.84607	0.000358259	1.06899	0.966226	-1.25821	0.431779
Slc7a3	21.2327	0.000614176	8.40456	0.000358259	6.54023	0.0321592	6.22612	0.00362582	Vipr2	-2.20205	0.000614176	-3.75964	0.000358259	1.0005	0.99748	-1.01013	0.911977
Fcrls	2.05339	0.000614176	8.23257	0.000358259	-1.0913	0.905007	1.00682	0.907881	Svep1	-2.23079	0.000614176	-3.68858	0.000358259	1.13259	0.723947	1.09806	0.510586
Tyrobp	1.75997	0.000614176	6.60151	0.000358259	-1.00659	0.99748	1.03389	0.858971	Stap2	-2.49898	0.000614176	-3.64479	0.000358259	1.0523	0.99748	-1.00734	0.901765
Lyz2	1.61195	0.00202713	6.08023	0.000358259	1.22309	0.460003	1.50169	0.0748452	Cerkl	-1.74595	0.000614176	-3.55383	0.000358259	1.03485	0.99748	-1.05329	0.585365
Spp1	1.40463	0.0303999	6.07552	0.000358259	1.50226	0.932602	1.47523	0.222778	Plk5	-1.37235	0.0210495	-3.22854	0.000358259	-1.05973	0.960483	-1.42828	0.027578
Fam129a	3.54396	0.000614176	5.91337	0.000358259	1.44033	0.576275	1.73714	0.00362582	Ptpn22	-1.47164	0.00951055	-3.09045	0.000358259	1.6579	0.725699	1.01709	0.874924
Ly86	1.8616	0.000785279	5.73344	0.000358259	1.0354	0.948919	-1.02156	0.854272	Ldoc1	-2.05202	0.00275227	-2.85542	0.000358259	1.14587	0.969479	1.00011	0.912941
Ddr2	5.52312	0.000614176	5.72143	0.000358259	2.54261	0.124383	2.78892	0.00362582	Tbata	-1.68193	0.000614176	-2.66392	0.000358259	1.08387	0.745945	-1.10553	0.387431
C1qc	1.75057	0.00305893	5.65089	0.000358259	1.01125	0.99748	-1.01962	0.889266	C230081A13Rik	-1.75261	0.000614176	-2.51403	0.000358259	-1.06496	0.961005	-1.08648	0.26177
Cd180	1.5602	0.00603469	5.53123	0.000358259	-1.00425	0.99748	1.06646	0.853571	Gm1332	-1.43272	0.00794772	-2.49185	0.000362968	1.06376	0.99748	1.02338	0.902274
Cd68	1.82308	0.000614176	5.41869	0.000358259	1.09529	0.842196	1.14683	0.261609	Dnahc11	-1.4383	0.0021446	-2.46849	0.000358259	1.0861	0.904363	1.37233	0.0423236
A830018L16Rik	5.49023	0.000614176	5.37383	0.000358259	1.13379	0.667647	-1.00553	0.9027	Ror1	-1.9302	0.000614176	-2.42549	0.000358259	-1.15939	0.603229	-1.16609	0.0689343
Cd52	1.3579	0.0101059	5.13715	0.000358259	1.11695	0.844721	1.10181	0.631812	Mybpc3	-2.28062	0.000614176	-2.38694	0.000358259	1.21109	0.968718	1.04439	0.896911
C1qb	1.66118	0.000614176	4.79528	0.000358259	-1.00675	0.99748	1.01996	0.882117	Airn	-2.44302	0.000614176	-2.33538	0.000358259	1.23878	0.994233	1.04694	0.905997
Cox6a2	4.79523	0.000614176	4.76665	0.000358259	2.41731	0.0321592	3.24027	0.00362582	Abcc8	-1.57838	0.000614176	-2.33415	0.000358259	-1.10296	0.624521	-1.25202	0.019532
Stc2	4.41619	0.000614176	4.59298	0.000358259	2.07894	0.114903	2.55019	0.00372501	Cacna1e	-1.72145	0.000614176	-2.32637	0.000358259	-1.12744	0.745945	-1.16396	0.037772
Gpnmb	1.12157	0.15479	4.58814	0.000358259	-1.06068	0.972831	1.18824	0.0856983	Aifm3	-2.04065	0.000614176	-2.31352	0.000358259	-1.02664	0.99748	-1.01183	0.896178
Kcnt2	5.8557	0.000614176	4.58656	0.000358259	1.1423	0.954007	1.1398	0.597818	Abca8b	-1.58365	0.000614176	-2.31046	0.000358259	1.10527	0.817984	1.14946	0.426391
C3ar1	1.47162	0.00423898	4.57186	0.000358259	1.23571	0.397985	1.40602	0.0425623	1110032A04Rik	-1.65291	0.00362243	-2.30871	0.000358259	1.36021	0.662144	-1.02481	0.854226
Chac1	5.21389	0.000614176	4.55284	0.000358259	2.92925	0.0321592	3.91268	0.00362582	Gpr22	-1.83056	0.000614176	-2.28048	0.000358259	-1.25597	0.555045	-1.22805	0.120479
C1qa	1.32389	0.00584382	4.48903	0.000358259	-1.015	0.99748	-1.0533	0.761997	Ccnjl	-1.48292	0.00284604	-2.25081	0.000358259	1.06157	0.992683	-1.37714	0.0863356
Cacng3	4.17039	0.000614176	4.45497	0.000358259	1.28039	0.353052	1.16254	0.0863342	Scx	-1.52555	0.00630293	-2.24534	0.000358259	-1.05303	0.992878	1.07654	0.850621
Fcer1g	1.43972	0.00603469	4.41761	0.000358259	-1.0447	0.99748	-1.00145	0.914907	Kcnt1	-1.7395	0.000614176	-2.22799	0.000358259	1.12614	0.992878	-1.01252	0.905997
Sesn2	6.27984	0.000614176	4.41159	0.000358259	2.44292	0.114903	2.79732	0.00362582	Adamts10	-1.94065	0.000614176	-2.21061	0.000358259	1.21481	0.753343	1.03027	0.81528
Itgax	1.04	0.443335	4.30318	0.000358259	1.02506	0.99748	1.03804	0.838424	Mrgprf	-1.40413	0.000614176	-2.20334	0.000358259	1.34296	0.715632	1.05714	0.871691
Zcchc12	3.05844	0.00194508	4.20378	0.000358259	1.24147	0.575294	1.66071	0.03521	Rnf152	-1.80665	0.000614176	-2.19542	0.000358259	1.23065	0.935414	1.09955	0.659492
Gfap	1.54742	0.000614176	4.12219	0.000358259	1.06853	0.968656	1.3509	0.0154173	Sidt1	-1.57052	0.00202713	-2.1889	0.000358259	-1.17763	0.60574	-1.29879	0.126896
Cyb5r1	4.66046	0.000614176	4.06544	0.000358259	2.12031	0.123349	3.24917	0	Tll1	-1.3829	0.00651522	-2.18504	0.000362968	1.2014	0.994895	-1.04389	0.863004
Laptm5	1.56213	0.000614176	4.01827	0.000358259	-1.08548	0.887153	-1.05012	0.432434	Trhde	-1.73675	0.000614176	-2.18479	0.000358259	-1.10966	0.5278	-1.268	0.0733617
Ctss	1.49926	0.00423898	4.01616	0.000358259	-1.00633	0.99748	-1.02597	0.881755	Cdh15	-1.53308	0.000800996	-2.179	0.000394698	1.17282	0.972831	-1.01028	0.896789
Mpeg1	1.77532	0.00459801	3.98918	0.000358259	1.03665	0.99748	1.05226	0.850621	Mir344	-1.47005	0.00202713	-2.15066	0.000358259	1.1292	0.98139	-1.1179	0.803231
Reep6	3.41455	0.000614176	3.90197	0.000358259	1.95402	0.541044	1.41027	0.0047718	Gm10118	-1.35265	0.014866	-2.13246	0.000358259	1.40137	0.923221	-1.08676	0.838634
Clec7a	1.18956	0.0653858	3.9008	0.000358259	1.09543	0.733834	1.13119	0.401614	Cntnap4	-1.46188	0.00114002	-2.12955	0.000358259	1.08547	0.99748	-1.10183	0.756679
Ccl6	1.36357	0.0147558	3.88838	0.000358259	1.14129	0.433009	1.06982	0.630158	9330155M09Rik	-1.41666	0.0191168	-2.12943	0.000358259	-1.09745	0.965679	-1.12286	0.629581
Mthfd2	5.67318	0.000614176	3.85968	0.000358259	3.69388	0.0384267	4.55955	0.00362582	Wscd2	-1.44038	0.000614176	-2.12618	0.000358259	1.13151	0.529783	-1.11716	0.0572435
Cyb5r2	3.16838	0.000614176	3.61377	0.000358259	1.32784	0.677056	1.6853	0.00514996	Tle2	-1.55806	0.00305893	-2.11254	0.000358259	1.00133	0.99748	1.0139	0.864109
Cd53	1.48962	0.0105916	3.5842	0.000358259	-1.09458	0.899122	-1.08374	0.710755	Rims1	-1.57302	0.000614176	-2.09947	0.000358259	-1.07208	0.596137	-1.21178	0.0589712
2900055J20Rik	4.72471	0.000614176	3.57307	0.000358259	-1.00892	0.99748	-1.05186	0.806643	Galnt7	-1.56701	0.00397398	-2.08667	0.000418494	1.17672	0.848937	-1.0616	0.85093
Nupr1	2.98396	0.000614176	3.54273	0.000358259	1.73702	0.474021	1.61851	0.00394117	Camkk2	-1.52601	0.000614176	-2.0863	0.000358259	1.03529	0.99748	-1.12249	0.0380325
Trim66	4.38036	0.000614176	3.42583	0.000358259	3.02164	0.0698667	2.87694	0.00362582	Camk4	-1.32292	0.00202713	-2.08353	0.000358259	1.1982	0.878979	-1.10852	0.570931
Fbln5	2.70945	0.000614176	3.41813	0.000358259	1.44675	0.571012	1.66008	0.021099	Kcnk10	-1.58375	0.000614176	-2.06507	0.000358259	1.19502	0.949033	-1.03975	0.840267
Hexb	1.51503	0.000614176	3.30818	0.000358259	-1.10976	0.728821	-1.03111	0.819574	Mapk12	-1.36116	0.004411	-2.06061	0.000437336	1.1456	0.960796	1.06418	0.649663
C4b	1.41141	0.0163468	3.30785	0.000358259	1.29932	0.401345	1.72486	0.00988115	Slco2a1	-1.2891	0.0121161	-2.05655	0.000358259	1.00819	0.99748	-1.04745	0.868242
Lgals3bp	1.53686	0.02168	3.29223	0.000358259	1.13375	0.932602	1.83663	0.131513	Tnc	-2.24704	0.000614176	-2.05484	0.000556244	-1.10347	0.905117	-1.01654	0.895247
Ifit3	1.70539	0.0298267	3.26866	0.000827361	1.52852	0.386174	1.96282	0.0312813	Olfm3	-1.54008	0.000614176	-2.05046	0.000358259	1.36355	0.980987	-1.22886	0.466117
Paqr3	3.54408	0.000614176	3.20525	0.000358259	1.32611	0.562684	1.39509	0.0051208	Kif26b	-1.69461	0.00194508	-2.04279	0.000375362	1.05668	0.822609	-1.09277	0.597595
Emr1	1.3309	0.00378681	3.19911	0.000358259	-1.01695	0.99748	1.0185	0.888768	Cdon	-1.55362	0.000614176	-2.04137	0.000358259	1.06932	0.977204	-1.15506	0.243951
Ifit1	1.36471	0.104338	3.19646	0.000899623	1.29388	0.474021	1.6702	0.0947572	Acpl2	-1.41038	0.000746688	-2.03773	0.000358259	1.02695	0.99748	-1.1761	0.221832
Slc7a11	2.42607	0.000614176	3.1806	0.000358259	1.17349	0.695471	1.74418	0.00895855	Ccdc120	-1.73477	0.000614176	-2.02168	0.000358259	1.07794	0.972831	-1.01075	0.896556
Fcgr3	1.15628	0.0221239	3.17759	0.000358259	-1.10952	0.816776	-1.00149	0.914907	Sla	-1.65019	0.000614176	-2.01417	0.000358259	1.17525	0.95633	1.1301	0.766631
Gdf15	4.55496	0.000614176	3.14189	0.000358259	1.55161	0.720874	1.09969	0.734927	Rnf112	-1.36545	0.000621394	-1.99368	0.000360129	-1.1675	0.449382	-1.27877	0.0507863
Cxcl10	1.17303	0.0297164	3.1259	0.000899623	1.28323	0.562684	1.45442	0.12597	Ano3	-1.8159	0.00537649	-1.98157	0.000368758	-1.17917	0.851595	-1.61291	0.0278909
4930486G11Rik	3.77498	0.000614176	3.04966	0.000358259	1.75356	0.403267	1.86134	0.00364464	Epha3	-1.29433	0.0283434	-1.97948	0.000362968	-1.10773	0.682387	-1.18684	0.431779
Fcgr2b	1.35627	0.00866577	3.03693	0.000358259	-1.02777	0.99748	1.07466	0.704352	Ryr3	-1.74742	0.000614176	-1.97817	0.000517509	-1.20084	0.755716	-1.1928	0.0890056
Cd74	1.23679	0.0279277	2.98854	0.000358259	1.14347	0.310651	1.32477	0.40594	Mir27b	-1.62158	0.000614176	-1.97168	0.000501069	1.0843	0.968135	1.10512	0.341009
Slc1a4	3.16693	0.000614176	2.9695	0.000358259	1.74872	0.0384267	2.13342	0.00362582	Cnksr3	-1.49494	0.000614176	-1.95476	0.000362903	1.21564	0.715632	1.05461	0.82927
Slc7a1	3.3889	0.000614176	2.95889	0.000358259	2.09067	0.0384267	2.41845	0.00362582	Ndst3	-1.30056	0.0113266	-1.95332	0.000358259	1.41231	0.676702	-1.03247	0.891788
Ctsc	1.48128	0.0203223	2.89809	0.000358259	-1.06518	0.99748	1.39118	0.056468	Tiam1	-1.35632	0.000614176	-1.9504	0.000358259	-1.05443	0.99748	-1.32669	0.0439924
Ccl9	1.36397	0.0183248	2.89255	0.000472249	-1.03785	0.954007	1.02341	0.896536	Mir690	-1.53442	0.00456625	-1.94844	0.000358259	-1.0232	0.99748	-1.10134	0.840857
Cdkn1a	1.96067	0.000614176	2.88096	0.000358259	2.01237	0.583437	1.87034	0.0265979	6430571L13Rik	-1.78063	0.00114002	-1.94352	0.00105199	1.2023	0.868922	-1.01256	0.888317
Phf10	2.58976	0.000614176	2.85967	0.000358259	1.43378	0.419086	1.69485	0.00744736	Aqp6	-1.0629	0.253938	-1.94309	0.000465255	1.55453	0.62605	1.08433	0.848816
Oasl2	1.36122	0.0326225	2.85185	0.000391984	1.16682	0.745945	1.73214	0.0810599	Boc	-1.33769	0.000651623	-1.94295	0.000358259	1.40259	0.697304	-1.00149	0.91191
Glra1	1.42194	0.152526	2.81792	0.0167211	1.2445	0.482669	-1.00026	0.909631	Grin2a	-1.46466	0.0021446	-1.93711	0.000358259	-1.18674	0.680072	-1.33991	0.00960488
Shmt2	3.3674	0.000614176	2.7957	0.000358259	2.35013	0.124383	2.75547	0.00371524	Car9	-2.23221	0.000614176	-1.9269	0.000358259	1.14954	0.64176	1.18353	0.437923
Spata1	2.04957	0.000933927	2.78202	0.000358259	1.07063	0.99748	1.2705	0.109823	Gpr137c	-1.55242	0.00211338	-1.92492	0.000358259	-1.09356	0.754189	-1.19188	0.00948183
Olfml3	1.37211	0.00612509	2.78104	0.000358259	1.00082	0.99748	1.07419	0.773009	Slc29a4	-1.71684	0.000614176	-1.91388	0.000358259	-1.17173	0.666554	-1.1372	0.549591
Tgtp1	1.02617	0.574966	2.77473	0.020578	1.13206	0.927824	2.18708	0.28186	Slitrk4	-1.33488	0.000614176	-1.91081	0.000407494	1.02381	0.99748	1.00361	0.912941
Aldh1l2	5.49436	0.000614176	2.75856	0.000358259	3.79245	0.307955	2.81267	0.0047718	Car4	-1.5554	0.00218046	-1.9094	0.000358259	1.0484	0.99748	-1.22783	0.149497
Nckap1l	1.42322	0.00389468	2.73151	0.000358259	-1.01835	0.99748	-1.01633	0.860099	Kcnj6	-1.35252	0.00667702	-1.90751	0.000438364	-1.08972	0.938003	-1.33065	0.0751226
Irgm1	1.32894	0.0316981	2.72566	0.000474833	1.08295	0.904363	1.40323	0.122603	Als2	-1.3133	0.00380498	-1.90458	0.000358259	1.13339	0.986708	-1.12088	0.461203
Pld4	1.37883	0.000621394	2.68454	0.000358259	-1.02835	0.99748	1.00305	0.912586	Prrt2	-1.26909	0.00319369	-1.90419	0.000358259	1.09436	0.419086	-1.06192	0.764352
Slc43a3	1.5583	0.011381	2.68198	0.000358259	1.03344	0.99748	1.45463	0.169002	Tmem132c	-1.32869	0.0114376	-1.88837	0.000358259	1.01443	0.99748	1.04562	0.700393
Hmox1	1.86521	0.000614176	2.67507	0.000358259	1.29982	0.376874	1.78977	0.00362582	Cntnap1	-1.64986	0.000614176	-1.88756	0.000358259	-1.06032	0.972831	-1.20535	0.137801
Tlr7	1.1341	0.108009	2.65638	0.000358259	-1.18692	0.563475	-1.06554	0.834284	Mmp23	-1.59245	0.00365296	-1.88587	0.000358259	1.06905	0.966992	1.04189	0.822652
Cd84	1.11345	0.120055	2.6408	0.000358259	1.01849	0.99748	1.02841	0.59981	Speg	-1.39677	0.00397398	-1.88512	0.000358259	-1.08062	0.923221	-1.10422	0.117268
Atp6v0d2	-1.01173	0.535498	2.61903	0.000358259	-1.04005	0.697674	-1.02116	0.723024	D17H6S56E-3	-1.47412	0.00114002	-1.88256	0.000360129	-1.03896	0.99748	1.00816	0.909631
Csf1r	1.26082	0.0362228	2.60306	0.000358259	-1.08454	0.954007	-1.07049	0.494386	Adam11	-1.61467	0.00202713	-1.87807	0.000358259	-1.10847	0.646287	-1.18679	0.109031
Fibin	2.3132	0.00194508	2.57685	0.000358259	1.3605	0.419086	1.94807	0.0139371	Tmem145	-1.4036	0.00903844	-1.87766	0.000368758	1.22296	0.838447	-1.04392	0.868287
Olfr111	1.16138	0.0588612	2.56784	0.000358259	1.00765	0.99748	1.0654	0.693163	Cadps2	-1.42271	0.00363446	-1.87317	0.000358259	1.16105	0.99748	-1.3992	0.201508
Cx3cr1	1.38544	0.000614176	2.56656	0.000358259	-1.03091	0.99748	1.02644	0.838424	Slc15a2	-1.35011	0.0757815	-1.87232	0.00349351	-1.07235	0.99748	-1.16706	0.723024
Slc16a14	2.55584	0.000614176	2.54339	0.000358259	1.62701	0.419086	1.66063	0.00514996	Epb4.1l4b	-1.30814	0.00423898	-1.87066	0.000358259	1.29062	0.812758	-1.21054	0.146848
A730017C20Rik	1.7893	0.022842	2.52646	0.00117052	1.04791	0.99748	1.09361	0.649951	Exph5	-1.24274	0.00202713	-1.86458	0.000358259	1.85234	0.767788	1.02075	0.7542
Ecm2	1.86001	0.000813568	2.49536	0.000358259	1.07489	0.992878	1.24731	0.229842	Slc16a11	-1.41719	0.00423948	-1.85817	0.000358259	1.05309	0.99748	-1.00195	0.912666
Trem2	1.19001	0.0185663	2.47324	0.000358259	1.00085	0.99748	1.08124	0.81528	Gpr52	-1.42125	0.00202713	-1.85244	0.000358259	-1.12476	0.715632	-1.01141	0.902274
H2-Aa	1.12025	0.2489	2.46813	0.000899452	1.09134	0.906567	1.35133	0.354009	Gabra6	-1.30134	0.0165477	-1.8468	0.000358259	25.1642	0.5278	1.00008	0.914907
Mamdc2	1.11162	0.15429	2.44538	0.000358259	1.07657	0.982514	1.23073	0.156053	Tbc1d8	-1.44634	0.000637861	-1.84474	0.000358259	1.06842	0.99748	1.01468	0.887291
Syt5	1.55269	0.0197937	2.44032	0.000609239	-1.02965	0.99748	1.04793	0.697603	Pip5k1b	-1.69379	0.000614176	-1.84414	0.000358259	-1.19814	0.565476	-1.28899	0.0361899
Rasgrf2	1.78821	0.0508196	2.42131	0.00347824	-1.19458	0.786359	-1.28135	0.207712	Nos1	-1.37201	0.0117538	-1.84336	0.000358259	-1.04727	0.8698	-1.09305	0.674876
AI607873	1.10815	0.201795	2.40565	0.000537359	1.06105	0.942977	1.07195	0.652987	Gm996	-1.36369	0.00210031	-1.84051	0.000358259	1.0345	0.99748	-1.309	0.0198939
Adm2	2.47027	0.000614176	2.38946	0.000426223	1.3518	0.717891	1.27438	0.146856	Grin2c	-1.4098	0.0017332	-1.83845	0.000438364	1.21398	0.932602	-1.09827	0.423576
Slc7a5	2.4969	0.000614176	2.38431	0.000358259	1.70539	0.224019	2.02247	0.00362582	Necab3	-1.85531	0.000614176	-1.83612	0.000358259	1.16297	0.944035	-1.13275	0.0332609
Tac1	1.83842	0.0505615	2.37174	0.0175073	-1.119	0.506067	1.34346	0.482107	D8Ertd82e	-1.43483	0.00189545	-1.83304	0.000358259	1.14157	0.850178	1.05316	0.832527
Hpgds	1.31443	0.0152754	2.37145	0.000358259	-1.03213	0.99748	-1.04202	0.868287	Rnf148	-1.38302	0.0115992	-1.82914	0.00090638	1.22767	0.878979	-1.03026	0.676664
Cd93	2.23157	0.000614176	2.3712	0.000358259	1.4733	0.482669	1.48603	0.0364217	Barhl2	-1.43635	0.00200829	-1.82845	0.000368758	1.61978	0.743241	1.04202	0.871691
Ifitm3	1.4509	0.0237681	2.35184	0.000398023	1.24286	0.502113	2.0068	0.0768822	Rgl3	-1.62159	0.000614176	-1.82558	0.000362903	1.13499	0.965612	1.04803	0.842417
Tlr13	1.08699	0.280739	2.35155	0.00036791	-1.09515	0.834884	-1.07312	0.452131	Mir384	-1.55013	0.0114382	-1.82388	0.00165342	1.17156	0.659132	-1.07176	0.853571
Rtp4	1.21669	0.133839	2.34923	0.00143642	1.21382	0.793591	1.7385	0.0442877	AI118078	-1.38795	0.004411	-1.82311	0.000368758	1.70205	0.562684	1.05438	0.785086
Cd34	1.72612	0.000614176	2.34159	0.000358259	1.10226	0.603229	-1.01361	0.894444	Tmem132a	-1.39958	0.00374828	-1.82057	0.000358259	-1.02651	0.99748	-1.14849	0.0648652
H2-K1	1.13263	0.16621	2.3341	0.000713506	1.00817	0.99748	1.38745	0.0837495	Ppfia4	-1.31842	0.00501357	-1.81914	0.000358259	-1.00443	0.99748	-1.31968	0.00547029
Cd24a	1.39022	0.0478801	2.3253	0.000438364	-1.10139	0.954007	-1.0751	0.816944	Rims2	-1.49	0.00170956	-1.8151	0.000358259	1.06791	0.996875	-1.01836	0.896178
Asns	2.93384	0.000614176	2.31488	0.000358259	1.88053	0.0384267	2.041	0.00362582	Unc13c	-1.20817	0.228187	-1.81475	0.0011446	2.42507	0.770984	1.15497	0.872248
Cd33	1.36143	0.00651522	2.30763	0.000493444	1.07809	0.967013	-1.06308	0.848415	Kcnh1	-1.2435	0.0101964	-1.8124	0.000358259	-1.03096	0.99748	-1.16549	0.0334668
Cth	1.86472	0.00194508	2.3056	0.000358259	1.10125	0.528186	1.14528	0.531898	Ltbp2	-1.34087	0.0441529	-1.81204	0.00168779	1.02236	0.99748	1.10225	0.877701
Kctd16	2.444	0.0017332	2.30297	0.000358259	-1.05114	0.99748	-1.11748	0.0373922	Cntn6	-1.32256	0.00195034	-1.80607	0.000360129	1.86869	0.727976	-1.02485	0.89012
Acot2	1.63402	0.00202713	2.29287	0.000358259	1.14191	0.665736	1.10308	0.270777	4930578G10Rik	-1.43412	0.00864896	-1.80328	0.00184933	-1.19017	0.79593	-1.23373	0.43932
Atf3	2.50295	0.000785279	2.28829	0.000358259	1.40742	0.541138	1.74536	0.0229231	Jph4	-1.44727	0.000614176	-1.79362	0.000358259	-1.04389	0.99748	-1.21026	0.024771
Pdzd7	1.48955	0.00580776	2.27458	0.000358259	1.11549	0.906129	1.23878	0.0653768	Inadl	-1.55955	0.00112268	-1.79349	0.000358259	1.12896	0.904363	1.08165	0.153365
Xpot	2.40369	0.000614176	2.26834	0.000358259	1.3506	0.292201	1.60978	0.00613	Tesc	-1.74111	0.00204889	-1.7929	0.000438364	-1.18757	0.603229	-1.14881	0.394532
Ctsz	1.23068	0.0205575	2.2682	0.000358259	1.04023	0.80032	1.31236	0.0663902	Kcnc1	-1.25122	0.000614176	-1.79249	0.000358259	1.16402	0.905535	-1.11382	0.466746
Ctsh	1.40715	0.0330042	2.26643	0.000358259	1.08565	0.883846	1.17151	0.117268	Cdh8	-1.29139	0.00921537	-1.79053	0.000358259	-1.05983	0.969739	-1.16049	0.153924
Timp2	1.36117	0.0409353	2.24784	0.000358259	-1.08969	0.937071	1.13356	0.433368	Plch2	-1.52029	0.000614176	-1.78765	0.000435627	-1.05701	0.843183	-1.12043	0.166543
Fos	3.97557	0.00605963	2.2456	0.00349196	1.80196	0.335927	1.73893	0.0312813	Bmp1	-1.44365	0.000614176	-1.78664	0.000358259	-1.00397	0.99748	-1.14565	0.0269063
Rcc2	2.09743	0.000614176	2.23873	0.000358259	1.18236	0.435031	1.37572	0.00362582	Echdc2	-1.49	0.00319369	-1.78564	0.000358259	1.10152	0.539157	-1.06758	0.305082
Anxa3	1.58264	0.00293875	2.23628	0.000421949	1.09914	0.792394	1.21027	0.186171	Grm4	-1.46068	0.000614176	-1.7819	0.000358259	2.92649	0.66062	1.0521	0.812823
Nrp1	1.52883	0.00367365	2.23571	0.000358259	-1.20183	0.753343	-1.16644	0.224277	Reln	-1.27838	0.00441697	-1.78081	0.000358259	1.30205	0.887153	-1.23594	0.139601
1810010H24Rik	2.20655	0.000614176	2.23132	0.000439464	1.71567	0.376874	2.02615	0.0191604	Xkr6	-1.30079	0.00772573	-1.77769	0.000358259	1.06874	0.99748	-1.12403	0.181258
Nr4a1	4.9926	0.0027229	2.22004	0.00379323	1.35452	0.326643	1.42821	0.0552848	Kcnd2	-1.39284	0.00423898	-1.77101	0.000438364	1.0153	0.99748	-1.25978	0.00613
Arhgdib	1.31359	0.0131634	2.21785	0.000442753	1.01067	0.99748	1.23339	0.510586	Ccng2	-1.25124	0.00441697	-1.76991	0.000358259	1.01407	0.99748	-1.14252	0.433368
Aldh18a1	2.65826	0.000614176	2.21385	0.000358259	1.91422	0.114903	2.23294	0.00362582	6530402D11Rik	-1.23443	0.0411561	-1.76433	0.000687607	-1.1685	0.633628	-1.28228	0.0668601
Unc93b1	1.26264	0.00241579	2.21048	0.000358259	1.02918	0.99748	1.05046	0.834306	Phxr4	-1.85591	0.000614176	-1.75951	0.00142207	-1.05661	0.99748	-1.41294	0.0971892
Ezr	2.07442	0.000614176	2.19903	0.000358259	-1.02581	0.99748	1.17651	0.372335	Zfp467	-1.52752	0.00735097	-1.75759	0.000358259	1.05563	0.888225	1.05593	0.683123
Sfpi1	1.08337	0.164734	2.19826	0.000358259	1.13336	0.912328	1.01712	0.874195	Cytsb	-1.56102	0.000614176	-1.75451	0.00036791	-1.0539	0.866063	-1.10596	0.255011
Fmod	1.35093	0.0188462	2.19635	0.000358259	-1.06346	0.996945	1.51785	0.0631067	Kirrel3	-1.42072	0.00194508	-1.74799	0.000358259	1.02176	0.99748	-1.17966	0.233785
Eif4ebp1	3.13856	0.000614176	2.19528	0.000358259	2.12686	0.0922309	2.24671	0.00362582	D0H4S114	-1.27425	0.00202713	-1.74593	0.000358259	1.49253	0.8525	-1.11632	0.572152
Gars	2.38301	0.000614176	2.18357	0.000358259	1.45227	0.209074	1.76131	0.00362582	Igsf21	-1.44012	0.000621394	-1.74502	0.000358259	1.02406	0.99748	-1.13206	0.711264
Ctsd	1.26469	0.0065857	2.18314	0.000358259	1.00553	0.99748	1.15168	0.296641	AY512949	-1.26733	0.00993349	-1.74231	0.000851708	-1.16469	0.724818	-1.10958	0.359084
Trim30	1.32759	0.00796242	2.17838	0.000453111	1.19984	0.486513	1.44659	0.129725	Tyro3	-1.86181	0.000614176	-1.74031	0.000358259	-1.04975	0.886924	1.03993	0.770874
Cyba	1.38884	0.0146399	2.16632	0.000358259	1.14659	0.376874	1.17336	0.0269063	Mirg	-1.42576	0.00342629	-1.73846	0.00388593	1.03057	0.99748	-1.02981	0.886664
Agxt2l1	1.79662	0.00688162	2.15	0.000899452	1.76915	0.310651	1.48468	0.188604	Ncrna00085	-1.3468	0.0017332	-1.73798	0.000474643	1.14348	0.665598	-1.12937	0.433662
Mafb	1.1368	0.054023	2.14176	0.00059928	-1.04167	0.99748	-1.0849	0.778542	Samd14	-1.52653	0.00274192	-1.73557	0.000358259	-1.0206	0.99748	-1.12451	0.478771
I830012O16Rik	1.30897	0.12837	2.13769	0.00838441	1.08968	0.875488	1.17548	0.136663	Ryr2	-1.36324	0.014447	-1.73302	0.000358259	-1.11508	0.816337	-1.22515	0.0188737
Tgfbr1	1.14346	0.0890129	2.12776	0.000358259	1.00399	0.99748	-1.0707	0.643226	Tmem178	-1.23963	0.00202713	-1.73206	0.000358259	-1.01782	0.99748	-1.13716	0.182384
Ly96	1.36521	0.0433482	2.12707	0.000617854	1.05882	0.99748	1.04902	0.890351	Slc8a2	-1.37263	0.00114002	-1.731	0.00116625	-1.10942	0.769226	-1.3733	0.0256901
Gbp2	1.23807	0.0326625	2.12619	0.00297076	1.11452	0.469628	1.52344	0.117268	Plcxd3	-1.5275	0.00374828	-1.72773	0.000358259	1.01756	0.99748	-1.14611	0.585249
Lgals9	1.34343	0.0040556	2.12334	0.000358259	1.11189	0.677056	1.20314	0.161641	Mir23b	-1.39903	0.00580776	-1.7253	0.000368758	1.02134	0.99748	1.05923	0.711765
Il2rg	1.66186	0.00507414	2.12086	0.000475023	1.45981	0.263221	1.41207	0.0752539	Cdc42bpg	-1.23745	0.0231689	-1.72429	0.000527593	1.21854	0.682013	1.03397	0.796706
Lmo3	1.57149	0.0257464	2.11838	0.00502978	-1.09927	0.908555	-1.19088	0.188754	Cnpy1	-1.29127	0.00537649	-1.72387	0.000358259	3.88365	0.619261	1.06638	0.858971
Tars	2.13465	0.000614176	2.10637	0.000358259	1.39628	0.367111	1.62594	0.0157699	Synpr	-1.34108	0.00362037	-1.72182	0.000362968	-1.1641	0.59869	-1.29008	0.0410069
Lag3	1.12051	0.0546986	2.10443	0.0009867	1.04681	0.887688	1.15213	0.356262	Rabgap1l	-1.52417	0.00268198	-1.72054	0.000358259	-1.04524	0.995733	-1.09026	0.644069
Apoc1	-1.03064	0.572565	2.07964	0.0012595	-1.06529	0.99748	1.16171	0.711413	Neurod1	-1.27102	0.00863586	-1.71917	0.000358259	1.82324	0.750338	-1.38733	0.122603
Aspn	1.31695	0.0248196	2.07389	0.00196137	1.14088	0.863996	1.32586	0.294616	Dpysl4	-1.56744	0.00112268	-1.71641	0.000499387	-1.01541	0.99748	-1.11436	0.0440799
Osmr	1.30619	0.0192105	2.06694	0.000463745	1.16738	0.662144	1.14303	0.318387	C230004F18Rik	-1.48165	0.000614176	-1.71184	0.000362968	1.06831	0.807991	-1.14746	0.430018
Cd63	1.15746	0.135008	2.06474	0.000368758	1.10082	0.905535	1.38381	0.0265979	Gm10403	-1.52516	0.0157714	-1.71058	0.00196236	-1.10032	0.820079	-1.11842	0.179136
Sstr2	2.28893	0.00114002	2.06383	0.000391984	1.03297	0.99748	1.0021	0.912941	Fam135b	-1.50247	0.0156653	-1.70991	0.000394698	-1.11017	0.992878	-1.10519	0.757343
Psat1	1.85979	0.000614176	2.06278	0.000358259	1.30193	0.0922309	1.50768	0.00390214	Lypd6	-1.25993	0.00195034	-1.70971	0.000365409	1.02168	0.99748	-1.04296	0.808836
Chi3l1	1.18109	0.125772	2.06046	0.000438364	1.01151	0.99748	1.08815	0.713068	Mical2	-1.68597	0.000614176	-1.70936	0.000358259	-1.1326	0.808835	-1.08591	0.211897
Igf1	1.18199	0.0517534	2.05092	0.000358259	-1.00929	0.99748	-1.17127	0.101727	Igsf9b	-1.56119	0.000614176	-1.70857	0.000358259	1.09703	0.99748	-1.08315	0.798629
Gbp4	1.1455	0.0873371	2.0467	0.0279455	1.07394	0.767843	1.49197	0.299475	Crtam	-1.40528	0.0169343	-1.70522	0.0010098	1.22877	0.865238	-1.01983	0.868651
6330403K07Rik	1.61478	0.0527188	2.04499	0.00356265	-1.08954	0.966226	-1.02527	0.883675	Syne1	-1.2982	0.000614176	-1.69612	0.000358259	1.28508	0.825919	1.0075	0.908749
Phgdh	1.74481	0.00326355	2.04456	0.000358259	1.18149	0.916584	1.54142	0.041071	Xk	-1.40297	0.00447474	-1.69212	0.000362968	1.01765	0.99748	-1.07979	0.347566
Zdbf2	1.57611	0.0128688	2.04364	0.000407494	-1.06337	0.919868	1.16077	0.788617	Ypel4	-1.32885	0.0187088	-1.69208	0.000452222	-1.02542	0.99748	-1.09389	0.636618
Pycr1	2.66742	0.000614176	2.04053	0.000358259	1.51952	0.291327	2.01516	0.00362582	Kcnj12	-1.27319	0.0100677	-1.6919	0.000723435	1.16967	0.882121	1.11646	0.483085
Lect1	-1.00915	0.547822	2.0384	0.000358259	-1.20192	0.482669	1.15066	0.585249	Tbc1d25	-1.2701	0.015424	-1.68927	0.000358259	-1.00021	0.997662	-1.0914	0.503131
Casp8	1.32965	0.0158696	2.0368	0.00036791	1.07312	0.954007	1.27542	0.0644024	Stxbp5l	-1.25561	0.0115976	-1.68566	0.000358259	-1.06068	0.856695	-1.28353	0.066004
Gm129	2.49235	0.000614176	2.03661	0.000895001	1.76502	0.469628	1.55896	0.17227	Ppargc1b	-1.47175	0.00189545	-1.68515	0.000358259	1.21038	0.589564	-1.014	0.893561
Entpd1	1.26594	0.000614176	2.03446	0.000358259	-1.10723	0.674338	1.01657	0.888933	9830001H06Rik	-1.47635	0.0021446	-1.68379	0.000453111	1.10023	0.87002	-1.10368	0.206597
Gpr165	1.60066	0.0411926	2.03129	0.00430401	-1.00716	0.99748	1.14492	0.537524	Abca7	-1.50753	0.00202713	-1.67972	0.000444378	-1.06274	0.960527	1.05344	0.838393
Scn3b	1.09475	0.352226	2.02958	0.00212546	-1.15109	0.82393	-1.20402	0.0312813	Gas7	-1.42335	0.000614176	-1.67176	0.000358259	-1.00959	0.99748	-1.09876	0.111721
Herpud1	2.19472	0.000614176	2.02941	0.000358259	1.46361	0.376874	2.0013	0.00362582	Fstl5	-1.38717	0.0148501	-1.66895	0.00280404	-1.01345	0.99748	-1.06403	0.854131
Inpp5d	1.11718	0.0525341	2.02792	0.000358259	-1.07711	0.837044	1.00537	0.903161	4933415A04Rik	-1.34424	0.0045987	-1.66886	0.00042593	1.05153	0.99748	-1.02532	0.8393
Irgm2	1.29613	0.0155917	2.02686	0.00338009	1.0517	0.99748	1.47811	0.447919	Mir505	-1.08479	0.21385	-1.66572	0.000897992	1.16883	0.71109	1.04398	0.857525
Gm8995	1.20829	0.039583	2.02542	0.00117202	1.05043	0.99748	1.19857	0.635713	Fzd7	-1.28637	0.00648385	-1.66456	0.000358259	1.28118	0.782679	1.28333	0.122603
Pcdh11x	1.44004	0.0146756	2.0163	0.000554184	1.06587	0.867228	1.40727	0.0543765	Tpcn2	-1.31437	0.00441697	-1.65979	0.000360129	-1.02534	0.99748	1.02189	0.876069
Kcns2	1.871	0.000614176	2.01199	0.000360129	-1.09162	0.548089	-1.24586	0.084473	Pde1c	-1.49426	0.00735719	-1.65681	0.000358259	1.21024	0.959786	1.03226	0.854226
Lpl	1.19753	0.0456309	2.00795	0.000398023	-1.17231	0.793591	-1.09046	0.382669	Pard6g	-1.29603	0.00374828	-1.65675	0.000472641	1.21887	0.851595	1.02968	0.868377
Pabpc1l2b	1.79182	0.00441697	2.00518	0.000433791	-1.03807	0.99748	1.0108	0.913363	2900092E17Rik	-1.28034	0.00608911	-1.65463	0.000358259	1.18256	0.915219	-1.07256	0.598904
Ifit2	1.20224	0.112352	2.00462	0.000860572	-1.00181	0.99748	1.03918	0.851684	Cnnm4	-1.24499	0.0047326	-1.65394	0.000368758	1.03301	0.862568	-1.0603	0.534443
Mknk1	2.11939	0.000614176	2.00455	0.000358259	1.13329	0.879151	1.07398	0.299012	Pik3r3	-1.42647	0.00672922	-1.65084	0.000358259	1.15122	0.886924	-1.16351	0.39525
Itgam	1.17301	0.0435443	1.99745	0.000358259	-1.11577	0.816776	-1.25641	0.156506	C130030K03Rik	-1.15477	0.193113	-1.6506	0.000908054	1.27672	0.798048	-1.1426	0.775225
Slc40a1	2.04144	0.000621394	1.99672	0.000362903	1.46312	0.232111	1.19672	0.381577	Coro2a	-1.4918	0.00389468	-1.65031	0.000432164	-1.06406	0.892433	-1.04206	0.649951
Pros1	1.44127	0.00319369	1.99635	0.000358259	1.08719	0.865747	1.10483	0.0837495	Rapgef4	-1.30722	0.000614176	-1.6503	0.000358259	1.03081	0.99748	1.04713	0.588384
Car5b	1.2092	0.00785665	1.99539	0.000358259	-1.08885	0.975712	1.08499	0.824011	1110012J17Rik	-1.16233	0.0148501	-1.65029	0.000438364	1.51833	0.727976	1.03051	0.785241
Emcn	1.61385	0.004411	1.99377	0.000612323	1.19563	0.531146	1.53183	0.0812423	Ak3l1	-1.24842	0.0356031	-1.6487	0.0015784	-1.03558	0.99748	-1.10727	0.897855
2700007P21Rik	2.34447	0.000614176	1.98567	0.000358259	1.41391	0.36134	1.47201	0.0282461	Usp3	-1.30039	0.00652048	-1.64719	0.000358259	1.32082	0.711338	-1.01966	0.877212
Gpr137b-ps	1.60412	0.00202713	1.98116	0.000358259	1.20885	0.425348	1.20712	0.711765	Neurl1a	-1.35317	0.00374828	-1.64713	0.000358259	-1.07314	0.918459	-1.11535	0.0657182
AI451617	1.05308	0.312683	1.97967	0.00136726	1.07625	0.888316	1.39575	0.12415	Adrbk2	-1.37814	0.00202713	-1.64701	0.000429246	-1.03767	0.731461	-1.11892	0.76171
Fyb	1.23387	0.0212348	1.97641	0.000358259	1.03172	0.99748	1.02986	0.895856	Btg1	-1.10446	0.0453493	-1.64656	0.000358259	1.42677	0.748325	1.0239	0.89188
Plau	1.1675	0.0728093	1.97561	0.000360129	1.04326	0.951359	1.07752	0.258431	Kcnj9	-1.3648	0.00580776	-1.64341	0.000358259	-1.02064	0.99748	-1.09591	0.46103
Sema3c	1.54566	0.0180188	1.97415	0.00420986	-1.10946	0.923872	-1.09421	0.691515	Abcc12	-1.18111	0.00674951	-1.63992	0.000442753	1.06872	0.994233	-1.02757	0.879986
Rasgrp3	1.49175	0.000614176	1.97396	0.000368758	1.19013	0.412085	1.12082	0.180835	Klhl3	-1.37886	0.00374828	-1.63991	0.000904574	-1.16077	0.701044	-1.20424	0.134111
Mal2	1.3146	0.0540022	1.97054	0.00350425	-1.02272	0.99748	1.02039	0.891237	Cdh7	-1.20556	0.0051195	-1.63925	0.000439464	2.03444	0.695087	-1.002	0.912185
Gm5246	1.86064	0.00202713	1.96476	0.000360129	1.22191	0.469705	1.36269	0.0282055	Caln1	-1.48791	0.000614176	-1.63924	0.000358259	1.05982	0.772725	-1.01075	0.899012
Lars	2.24175	0.000614176	1.96108	0.000358259	1.64084	0.20128	1.74738	0.0126906	Mctp1	-1.20528	0.0205395	-1.63908	0.0419879	-1.0296	0.99748	-1.03419	0.912133
P2ry13	1.19077	0.0704116	1.95922	0.000358259	-1.17281	0.77894	-1.11347	0.183877	Grb7	-1.38339	0.00397401	-1.63862	0.000358259	1.05088	0.99748	-1.01268	0.896178
Usp18	1.19341	0.122614	1.95849	0.00189264	1.22899	0.662144	1.58126	0.211897	E330009J07Rik	-1.25267	0.00676208	-1.63544	0.00181282	1.18202	0.964933	1.00558	0.907881
Lpcat2	1.1783	0.0142762	1.95795	0.000421949	-1.02992	0.99748	-1.01356	0.896178	Scnn1g	-1.83641	0.000614176	-1.63341	0.00109806	1.08166	0.939751	1.04019	0.851684
Hexa	1.08987	0.144516	1.95072	0.000358259	-1.02052	0.99748	1.03931	0.865711	Chrd	-1.34628	0.00688162	-1.62782	0.000754619	-1.24003	0.477554	-1.23779	0.206597
Vstm2a	1.80633	0.0079712	1.95	0.000438364	1.02094	0.99748	-1.05277	0.817444	Dixdc1	-1.21946	0.00441697	-1.6254	0.000358259	1.00924	0.99748	-1.08097	0.403636
Cars	2.49802	0.000614176	1.94815	0.000358259	2.09932	0.0384267	2.14677	0.00362582	1700086D15Rik	-1.22189	0.0202014	-1.62496	0.000738383	1.06504	0.953929	-1.23408	0.184599
Ms4a6c	1.00507	0.597876	1.94735	0.000833696	-1.09001	0.870071	1.16993	0.460425	Alms1	-1.22611	0.0867818	-1.62427	0.00117812	1.48665	0.826317	1.10219	0.9027
Pgm5	1.09687	0.0322205	1.94596	0.000358259	1.0926	0.73005	1.0423	0.837826	Mir377	-1.25378	0.042463	-1.62388	0.00196553	1.11172	0.852719	-1.01928	0.891788
Txnip	-1.08226	0.172349	1.94494	0.000362968	1.05821	0.99748	1.59014	0.0236385	Flrt3	-1.56588	0.000614176	-1.62122	0.000358259	-1.15965	0.607918	-1.05585	0.62726
Cyth4	1.14079	0.0959244	1.94322	0.000362968	-1.04559	0.996945	-1.06404	0.771489	Slc2a6	-1.64659	0.00305893	-1.62117	0.000358259	-1.34134	0.376874	-1.24315	0.0405357
Cd9	1.14871	0.0809726	1.94184	0.000358259	-1.02135	0.99748	1.15389	0.0811917	Tmem25	-1.38143	0.000621394	-1.62089	0.000358259	-1.0321	0.984353	-1.17658	0.0784434
Kcnj2	1.29645	0.021392	1.93954	0.000550102	-1.27407	0.603229	-1.14411	0.809628	Phyhip	-1.32558	0.000614176	-1.61675	0.000358259	1.00041	0.99748	-1.15151	0.0762184
Id3	1.30169	0.0374671	1.93907	0.000358259	-1.04823	0.99748	1.13224	0.290876	Dusp16	-1.45746	0.00194508	-1.61604	0.000493444	1.14667	0.437487	1.06248	0.307274
Ddit3	1.90569	0.000785279	1.92681	0.00036791	1.58312	0.124383	2.52465	0.00362582	6430573F11Rik	-1.22592	0.00457214	-1.61472	0.000358259	1.39835	0.713282	1.01858	0.901489
Ddx58	1.30569	0.0211461	1.92613	0.000438364	1.18203	0.680801	1.33695	0.0715503	Cacna1c	-1.17276	0.00472249	-1.61444	0.000358259	-1.11192	0.792368	-1.09916	0.123476
Plek	1.11441	0.0708736	1.92566	0.000391984	1.02261	0.99748	1.01844	0.862509	Syt12	-1.1984	0.0296011	-1.61377	0.000358259	1.19644	0.855111	-1.00974	0.896695
AW551984	1.51758	0.0793941	1.92482	0.0130929	-1.07568	0.819851	1.01028	0.914907	Rnf133	-1.37957	0.00617528	-1.61252	0.00232331	1.09328	0.991394	-1.06452	0.392244
Abca1	1.69853	0.000614176	1.91751	0.000368758	1.33548	0.342894	1.50335	0.0106547	Mir340	-1.47282	0.0190211	-1.61131	0.00147315	1.12689	0.951737	1.01594	0.909291
Tmem176a	1.1399	0.118969	1.90238	0.000527593	-1.08136	0.876636	1.04291	0.82927	A2bp1	-1.18088	0.00194508	-1.60921	0.000358259	1.00788	0.99748	-1.08721	0.106225
Gpx3	1.69894	0.0109962	1.90099	0.000738383	1.08519	0.995769	1.08672	0.616127	Galnt13	-1.40922	0.00441697	-1.60607	0.000358259	1.79606	0.541138	-1.04082	0.87516
Gabrq	1.3702	0.10324	1.89819	0.0227573	-1.08901	0.603229	1.01666	0.888768	Pld5	-1.31572	0.00643171	-1.60598	0.000360129	2.29123	0.575294	1.26367	0.318822
Blnk	1.16477	0.0044284	1.88918	0.000358259	-1.22077	0.636831	-1.09918	0.545427	Mir30b	-1.07923	0.139629	-1.60504	0.000897061	1.28835	0.717891	1.05831	0.803198
Fam46c	1.52395	0.0407056	1.88593	0.000518355	1.27898	0.567506	1.28959	0.137097	Adcy1	-1.16201	0.0107573	-1.60455	0.000453111	1.01933	0.99748	-1.41813	0.0143467
Chd5	1.79458	0.00342629	1.88243	0.000358259	1.00221	0.99748	1.13174	0.515965	Spag1	-1.22516	0.0282928	-1.60428	0.000923851	1.05078	0.99748	-1.01049	0.900782
Isoc1	1.53935	0.000614176	1.88083	0.000358259	1.04179	0.994233	1.18582	0.151826	Gpr68	-1.50154	0.000614176	-1.60313	0.00124677	-1.03702	0.99748	-1.11524	0.71761
Hspa9	1.87795	0.000614176	1.87871	0.000358259	1.32885	0.376874	1.52615	0.00390214	Pgm2l1	-1.28003	0.00305893	-1.60238	0.000554184	-1.12628	0.677056	-1.25862	0.101716
Slfn5	1.5191	0.00472644	1.87852	0.000612863	1.20045	0.572768	1.18739	0.429553	Nedd4l	-1.19185	0.00672231	-1.60214	0.000358259	-1.14434	0.497435	-1.262	0.0273078
Mpa2l	1.08064	0.172349	1.87456	0.00484461	1.20493	0.528186	1.36454	0.404058	AI428936	-1.37328	0.00992645	-1.60148	0.000421949	1.13214	0.890816	1.07155	0.450007
Meis2	1.67594	0.0659409	1.87433	0.00992894	1.01231	0.99748	1.27254	0.118975	Pkib	-1.29571	0.0226242	-1.60112	0.000358259	1.12465	0.99748	-1.10728	0.0979452
Tnfsf10	1.24328	0.0564033	1.87335	0.00401881	1.12323	0.780564	1.37955	0.0926793	Odz1	-1.07338	0.20936	-1.59477	0.000358259	1.26808	0.932602	-1.18432	0.598056
Eif3c	1.82147	0.000614176	1.87195	0.037095	1.31687	0.512586	1.54217	0.205935	Pclo	-1.30339	0.00472249	-1.59341	0.000358259	1.02413	0.99748	-1.09564	0.309879
Akna	1.71757	0.000614176	1.8715	0.000358259	1.14826	0.808701	1.28453	0.0765148	Stat2	-1.46852	0.0021446	-1.59331	0.000461717	1.06384	0.99748	1.02144	0.879696
Sp100	1.22327	0.0373967	1.87115	0.00148627	1.09104	0.842677	1.22076	0.159404	Ldlr	-1.82978	0.00435287	-1.59101	0.0013007	-1.36068	0.176957	-1.24012	0.193642
Glra3	1.28396	0.121009	1.86948	0.018303	-1.13866	0.562684	-1.22392	0.227813	Nrg2	-1.37946	0.00580776	-1.59052	0.000358259	1.07334	0.99748	-1.11447	0.502362
Clec5a	1.02915	0.440776	1.86881	0.000438364	-1.04825	0.972831	1.0102	0.898641	Naaladl2	-1.16002	0.294183	-1.58933	0.0314343	1.10612	0.90027	1.09127	0.393905
Leprotl1	1.93728	0.000614176	1.86797	0.000358259	1.32434	0.469628	1.55099	0.00613	Rnf123	-1.33136	0.00262534	-1.58684	0.000358259	1.03472	0.99748	-1.01615	0.879986
Yars	2.0642	0.000614176	1.8577	0.000358259	1.5983	0.211322	1.64865	0.00372501	Zfp385b	-1.26227	0.00688162	-1.58617	0.000362903	1.11544	0.922535	1.03359	0.767634
Sox11	1.86942	0.000614176	1.85752	0.000358259	1.09293	0.99748	-1.07722	0.828429	9030425E11Rik	-1.75761	0.000614176	-1.58599	0.000611448	-1.12888	0.541138	-1.28612	0.0996104
9930111J21Rik2	1.25547	0.0335851	1.85688	0.000746254	1.06615	0.99748	1.21855	0.38789	Dpp6	-1.34646	0.004411	-1.58532	0.000358259	-1.05393	0.99748	-1.12271	0.302988
Gng5	1.37921	0.00688162	1.85412	0.000453111	1.08869	0.954606	1.30277	0.113274	Appl2	-1.48445	0.000614176	-1.58473	0.000358259	1.2334	0.67801	1.12918	0.182942
Cfh	1.35568	0.0304139	1.85178	0.000442753	1.03829	0.99748	1.22059	0.183889	Ablim1	-1.24239	0.00633878	-1.58364	0.000358259	1.30182	0.853989	1.00265	0.908995
Nup62	2.19313	0.000614176	1.85101	0.000358259	1.45218	0.0922309	1.46937	0.00514996	Arhgap10	-1.24865	0.233539	-1.58292	0.0300844	1.15718	0.99748	1.0138	0.89983
Pcdh18	1.50294	0.0142644	1.8483	0.0030368	1.11284	0.745945	1.12104	0.694802	Bat5	-1.345	0.00651522	-1.5824	0.000358259	1.08577	0.91241	1.03862	0.812213
Gbp3	1.24158	0.0330042	1.84569	0.00324912	1.14922	0.823781	1.38541	0.306807	Mpp3	-1.41077	0.000614176	-1.5798	0.000358259	-1.00691	0.99748	-1.24177	0.10096
Ang	1.18152	0.0170345	1.84504	0.000358259	1.01616	0.99748	1.1048	0.266141	Rif1	-1.03251	0.495859	-1.57715	0.000550102	1.62459	0.63381	1.18735	0.646652
Casp12	1.24918	0.118131	1.84372	0.00653056	1.19724	0.664435	1.08691	0.426391	Dab2ip	-1.40672	0.00194508	-1.57685	0.00036791	1.08217	0.866063	-1.08132	0.372335
Slc6a11	1.65182	0.0409344	1.84214	0.00494566	-1.0681	0.826317	-1.12292	0.465991	Lrrc4	-1.36096	0.00458375	-1.57628	0.000358259	-1.10182	0.732167	-1.18445	0.284851
Acsl5	1.49472	0.004411	1.84133	0.000453111	-1.18416	0.711338	-1.09192	0.723641	Mir382	-1.51552	0.000614176	-1.57624	0.00555687	1.048	0.993763	-1.11152	0.814145
Gpr84	1.16521	0.0560298	1.83862	0.00110718	1.11185	0.780875	1.03484	0.879696	Pnpla3	-1.41212	0.00796242	-1.57621	0.000358259	1.01849	0.99748	-1.04955	0.153571
Rassf4	1.11052	0.290398	1.8357	0.00100547	1.06183	0.946404	1.06477	0.686296	Ntn4	-1.30099	0.00196293	-1.57458	0.000418494	1.1297	0.972831	1.0422	0.856863
Otub2	1.62233	0.00112268	1.83019	0.000485231	1.05349	0.99748	1.24775	0.114517	St3gal2	-1.37965	0.00397398	-1.5727	0.000358259	-1.01138	0.99748	-1.06472	0.446028
Itm2a	1.5721	0.000614176	1.82871	0.000358259	1.20263	0.433009	1.29571	0.0443845	Mir487b	-1.2134	0.0436558	-1.57093	0.00232202	1.18501	0.742871	1.09746	0.817123
Nov	1.14584	0.0347634	1.82128	0.00291226	-1.21587	0.541138	-1.18407	0.820176	Mirlet7e	-1.27789	0.021392	-1.56989	0.00187364	1.09714	0.793449	1.00467	0.907309
Slco1a4	1.5258	0.000933927	1.82007	0.000664739	1.41558	0.373306	1.28091	0.191076	4931406H21Rik	-1.21102	0.0766212	-1.56939	0.00650111	1.26818	0.711129	1.09199	0.447919
Clic4	1.80666	0.000614176	1.8196	0.000358259	1.29412	0.615417	1.29647	0.0516328	Mapk11	-1.3908	0.00506345	-1.56871	0.00196553	-1.29627	0.512586	-1.07786	0.723024
Atp13a5	1.43416	0.00374828	1.81669	0.000373666	1.21834	0.502342	1.20494	0.175853	Zmynd8	-1.25413	0.000614176	-1.56729	0.000517509	-1.14641	0.589564	-1.19709	0.128118
Gpt2	2.13067	0.000614176	1.81351	0.000442753	1.16516	0.485611	1.18221	0.36855	Zfyve28	-1.1971	0.00651522	-1.56625	0.000358259	1.07726	0.99748	-1.08415	0.564253
Nbl1	1.28549	0.00683564	1.81149	0.000473433	-1.01768	0.99748	-1.0672	0.718742	Foxn2	-1.21664	0.0079712	-1.56552	0.000561162	1.15728	0.840154	-1.08632	0.218313
Kcnc2	1.51795	0.109967	1.81008	0.0155432	-1.25445	0.625662	-1.32037	0.101978	Bend6	-1.34873	0.00472531	-1.56506	0.000437336	1.01566	0.99748	-1.16287	0.292548
Tmem100	1.2395	0.0310645	1.80979	0.000611448	-1.04689	0.99748	-1.02842	0.879986	Il1rapl1	-1.12478	0.113915	-1.56477	0.0009867	1.00639	0.99748	-1.24346	0.371059
Peg10	1.32916	0.0147374	1.80223	0.00117202	1.03326	0.99748	1.36047	0.090622	Ccdc63	-1.54032	0.000614176	-1.56	0.00246195	1.14639	0.953047	-1.00619	0.903497
Lcp1	1.34058	0.00631528	1.80084	0.000554184	1.0359	0.992031	1.04915	0.806643	Fam131b	-1.19804	0.0316784	-1.55958	0.000721352	1.09591	0.85712	-1.04643	0.765379
Nars	1.84825	0.000614176	1.79843	0.000358259	1.52171	0.140962	1.77715	0.00362582	Ptchd1	-1.32612	0.0157936	-1.55934	0.00362178	1.23213	0.907095	-1.13053	0.473262
Il13ra1	1.32001	0.0211539	1.79211	0.000358259	1.05666	0.972831	1.08036	0.747392	Plekha5	-1.21408	0.00435287	-1.55843	0.000358259	-1.01287	0.99748	-1.09677	0.331788
Psph	1.91059	0.000614176	1.79192	0.000358259	1.69756	0.0321592	1.96174	0.00362582	Tead4	-1.39276	0.0191168	-1.55838	0.000837693	1.08242	0.99748	1.03441	0.888719
Cd72	1.09549	0.215872	1.79189	0.0010836	-1.00966	0.99748	1.05399	0.862981	Stard4	-1.5273	0.000900463	-1.55529	0.000603585	-1.14144	0.603229	-1.16108	0.170424
Cd86	1.11771	0.167182	1.78844	0.000442753	1.01202	0.99748	1.07289	0.451049	St8sia5	-1.36363	0.00374828	-1.55522	0.00106083	1.10867	0.99748	-1.06878	0.905033
Gabrg3	1.42906	0.0840253	1.78705	0.0056429	-1.05792	0.99748	-1.04067	0.871691	Kndc1	-1.47853	0.0017332	-1.55521	0.000358259	1.05942	0.562684	-1.00944	0.902142
Odz3	1.41083	0.0459904	1.78664	0.0023274	-1.01957	0.99748	1.20543	0.427418	Cited2	-1.30743	0.00244543	-1.55488	0.000358259	1.12259	0.894518	-1.06924	0.570195
Tgif1	1.23883	0.0211511	1.78664	0.000438364	1.14016	0.458858	1.14675	0.523715	Spock1	-1.41778	0.000614176	-1.55464	0.000358259	-1.01552	0.99748	-1.07023	0.530182
Arpc1b	1.13712	0.0289708	1.7866	0.000358259	1.01071	0.99748	1.11411	0.471898	Mir300	-1.38204	0.0188463	-1.55462	0.0021874	1.03095	0.99748	1.06853	0.912419
Nt5dc2	1.37374	0.00506934	1.78249	0.000362968	1.0678	0.992878	1.22513	0.134111	Kcnk9	1.03023	0.50343	-1.55451	0.00036791	1.03396	0.99748	-1.28844	0.306429
Serpinf1	1.48138	0.000614176	1.78208	0.000358259	1.19727	0.3071	1.34918	0.00613	Gm3893	-1.50641	0.0132663	-1.55431	0.0350538	-1.17246	0.607918	-1.02387	0.900339
Vegfa	2.17368	0.000614176	1.78187	0.000358259	1.55793	0.434408	1.48425	0.00613	Gprc5c	-1.22342	0.0231467	-1.55329	0.000827465	1.43358	0.740482	1.17061	0.433934
Slc17a6	1.74666	0.0523477	1.78135	0.0107362	1.20874	0.70638	1.05609	0.9027	Ccl21a	-1.23257	0.148623	-1.55293	0.0339404	-1.33346	0.482669	-1.16583	0.814064
Htr2c	1.64525	0.0537193	1.77801	0.0159813	-1.07604	0.99748	1.53389	0.194601	Epn3	-1.46753	0.000614176	-1.55109	0.00132657	1.12238	0.9026	1.24651	0.413399
1700007K13Rik	1.16191	0.1213	1.77757	0.00607971	-1.05643	0.99748	1.69109	0.0234459	Erc1	-1.25691	0.0257919	-1.55049	0.0015429	1.0478	0.99748	-1.28874	0.159441
Timp1	1.28013	0.023084	1.77732	0.000438364	1.0913	0.972831	1.0659	0.556889	Adamts18	-1.25425	0.000785279	-1.55015	0.000748866	1.30709	0.874776	1.00793	0.913197
AW112010	1.05539	0.311755	1.7766	0.0032607	1.08507	0.920349	1.25829	0.0615677	Sh3bgr	-1.25155	0.0296011	-1.55003	0.000864068	-1.11166	0.625968	1.01215	0.883373
Hvcn1	1.10716	0.230582	1.77445	0.000498047	-1.04114	0.99748	-1.03642	0.860265	Ralyl	-1.28413	0.00564909	-1.54779	0.000550102	-1.03935	0.99748	-1.03059	0.87989
Fxyd5	1.23893	0.0126316	1.7744	0.000358259	1.01091	0.99748	1.27087	0.145524	Phactr3	-1.5757	0.000614176	-1.54779	0.000358259	-1.07049	0.862368	-1.11411	0.223533
Abcg2	1.2502	0.0144571	1.77383	0.000358259	1.03392	0.99748	1.21773	0.139757	Plekho1	-1.48783	0.000614176	-1.54712	0.000358259	-1.05199	0.842865	-1.04505	0.713068
Calcrl	1.3858	0.00617528	1.77198	0.000612323	1.31422	0.482669	1.39892	0.042679	Slc9a5	-1.47105	0.00397398	-1.54686	0.000407494	1.01654	0.99748	-1.09071	0.56073
Eltd1	1.46775	0.000614176	1.76982	0.000358259	1.23685	0.528186	1.31039	0.043095	Mir369	-1.48871	0.00688162	-1.54675	0.000554184	1.09866	0.919405	1.05466	0.905583
Nsg2	1.51617	0.0160181	1.76938	0.000726433	-1.09782	0.922799	-1.026	0.864064	Mir134	-1.39781	0.00962101	-1.5467	0.00189024	-1.01623	0.99748	1.0288	0.866528
Rpp25	1.48224	0.0491745	1.76856	0.00765825	1.05475	0.99748	1.04391	0.808836	Mir485	-1.34724	0.000785279	-1.54662	0.00143806	1.029	0.99748	1.00959	0.912419
Slc11a1	1.1382	0.0297126	1.76801	0.000358259	1.1146	0.326643	1.13026	0.0312813	Rab15	-1.47368	0.000614176	-1.54562	0.000493444	-1.08597	0.954007	-1.08633	0.231425
Eif2s2	1.90968	0.00342629	1.76801	0.000358259	1.49823	0.342894	1.54084	0.0227416	Tmem108	-1.24263	0.000614176	-1.54444	0.000482481	-1.1433	0.603229	-1.18163	0.1141
Srgn	1.48541	0.00972396	1.76455	0.000517509	1.34937	0.235289	1.31912	0.130605	Hr	-1.42104	0.0106008	-1.54443	0.000851202	1.04835	0.99748	1.05854	0.823443
Rnf213	1.38426	0.0175724	1.76223	0.00215437	1.21207	0.607918	1.2945	0.13114	Syt2	-1.17827	0.000614176	-1.54389	0.000358259	1.53911	0.926046	-1.19359	0.193815
Itpkb	1.17777	0.0376569	1.75954	0.00042593	1.11914	0.711129	1.0808	0.702726	Ephb2	-1.30385	0.00345667	-1.54377	0.000362968	1.02247	0.99748	1.02462	0.854272
Plscr2	1.14854	0.0698737	1.75936	0.000899452	1.11708	0.920394	1.34598	0.0634078	Scn2a1	-1.17144	0.14072	-1.54213	0.001967	1.03457	0.99748	-1.08956	0.861318
Tek	1.50969	0.00265725	1.75891	0.000358259	1.224	0.521388	1.1405	0.0756545	Syt9	-1.25981	0.00319369	-1.53586	0.000550102	1.49006	0.868552	1.15768	0.457775
Tmem179	1.53599	0.0326814	1.75855	0.003045	-1.05134	0.99748	1.17302	0.098458	Car10	-1.30092	0.00374828	-1.53579	0.000399913	1.23109	0.904363	-1.11045	0.711765
Glra2	1.16516	0.0875002	1.75837	0.00424549	1.0647	0.99748	-1.08129	0.834306	Cbln1	-1.29283	0.00375229	-1.53313	0.000852108	8.24975	0.556329	1.06051	0.81886
Dab2	1.41406	0.00763641	1.75739	0.000368347	1.01079	0.99748	1.69015	0.0572435	Sgpp2	-1.38822	0.000614176	-1.53291	0.000392582	1.47561	0.811831	-1.04803	0.868588
BC028528	1.52704	0.000614176	1.75533	0.000523546	1.20046	0.482669	1.24541	0.0789091	Sphkap	-1.31874	0.0060367	-1.53283	0.000358259	-1.16613	0.63004	-1.60175	0.00656627
Basp1	1.52644	0.0269602	1.75266	0.00130819	-1.10336	0.841695	-1.03505	0.432434	Cdkl5	-1.4857	0.00202713	-1.52968	0.000362968	-1.09872	0.858252	-1.15907	0.212356
Tmem176b	1.21007	0.031346	1.75228	0.000358259	-1.01738	0.99748	1.1958	0.264127	Gabrd	-1.35094	0.00170085	-1.52956	0.000517509	1.41417	0.82232	-1.26589	0.0688379
Iars	2.02842	0.000614176	1.75086	0.000358259	1.5148	0.18436	1.75927	0.00371524	Pms1	-1.17791	0.0165807	-1.52925	0.000368758	1.14038	0.904363	-1.05103	0.666063
Dgkk	1.2938	0.0799768	1.75024	0.0236149	-1.01924	0.99748	1.04092	0.861827	Agap2	-1.24823	0.0242932	-1.52923	0.000358259	-1.11883	0.881065	-1.14047	0.0376255
Npl	1.02982	0.473903	1.74898	0.000358259	1.00452	0.99748	-1.0835	0.604293	St3gal5	-1.33084	0.00374828	-1.52915	0.000358259	-1.02741	0.99748	-1.13912	0.24901
Fnbp1l	1.43657	0.0128948	1.7441	0.00105833	-1.12134	0.730083	1.08531	0.871211	Maml2	-1.56354	0.0021446	-1.528	0.000783257	-1.1533	0.774533	-1.25034	0.0798197
Xlr	1.01589	0.545285	1.74335	0.00135578	-1.11814	0.771128	1.03655	0.858971	Mir380	-1.25125	0.0301139	-1.52732	0.00941229	1.02327	0.99748	-1.03411	0.883373
Scpep1	1.43939	0.00608911	1.74206	0.000358259	1.1478	0.557251	1.52518	0.00449627	Svop	-1.29124	0.021559	-1.52671	0.000442753	-1.14783	0.746597	-1.10571	0.432434
Vat1	1.27772	0.0325253	1.73817	0.000391984	-1.01342	0.99748	1.13746	0.509131	Slc35f3	-1.26931	0.00646555	-1.52592	0.00042593	-1.14787	0.437487	-1.24593	0.0355522
Itga6	1.27623	0.0261604	1.73763	0.000439464	1.02728	0.99748	1.04292	0.881435	Fat2	-1.24833	0.000614176	-1.52562	0.00170175	7.6824	0.563496	1.03113	0.872419
Cyyr1	1.64581	0.00435287	1.73613	0.000723435	1.25924	0.349865	1.26626	0.0605519	Sh2d3c	-1.42919	0.00293875	-1.52552	0.000358259	1.03495	0.942449	-1.10031	0.348242
B2m	1.20763	0.0832974	1.73527	0.000368758	1.09906	0.659132	1.1656	0.243544	Mtus2	-1.22205	0.021866	-1.52458	0.000358259	1.10138	0.749017	-1.00921	0.87516
Xaf1	1.05569	0.419135	1.72972	0.00254937	1.08648	0.966226	1.36635	0.024828	Tmem229b	-1.45237	0.00441375	-1.5245	0.000438364	1.0298	0.99748	-1.08701	0.484864
Nostrin	1.42111	0.00701472	1.72951	0.000358259	1.19207	0.575033	1.07131	0.871044	Fbxl22	-1.26678	0.00850042	-1.5236	0.00354243	1.10525	0.873461	1.05952	0.871691
A230006K03Rik	1.25042	0.0645531	1.72871	0.00673647	1.18057	0.770416	1.51834	0.0696305	Tecpr1	-1.41518	0.00472249	-1.52353	0.000358259	-1.02838	0.972831	-1.02328	0.828101
Grn	1.15298	0.135279	1.72831	0.0323441	1.06682	0.880473	1.0794	0.589553	D930030D11Rik	-1.02317	0.410069	-1.52294	0.00462649	-1.00618	0.99748	-1.37325	0.096212
Ogn	1.05635	0.426152	1.72768	0.00451104	-1.22112	0.858291	1.49056	0.244218	Zc3h6	-1.42578	0.00319369	-1.52235	0.0166331	-1.17218	0.694453	-1.16952	0.535875
Myc	1.11455	0.160174	1.72663	0.000358259	1.00702	0.99748	-1.0008	0.913197	Ankrd34a	-1.23556	0.0346639	-1.52208	0.000493444	-1.0368	0.99748	-1.20882	0.143288
Rps6ka2	1.58816	0.00545779	1.72652	0.000424855	-1.03983	0.99748	1.07842	0.733116	Prosapip1	-1.38781	0.00473455	-1.52178	0.000358259	-1.17583	0.727976	-1.22472	0.0267446
Lilrb4	1.10544	0.200975	1.7265	0.000622046	-1.00553	0.99748	1.07457	0.666667	Serpinb2	-1.45485	0.0168686	-1.52175	0.000990148	1.04604	0.99748	1.03545	0.888317
Serpine2	1.1843	0.125976	1.72409	0.000358259	-1.03766	0.99748	-1.0646	0.618092	Zfp521	-1.17998	0.0226412	-1.52144	0.000358259	2.03409	0.593944	1.1729	0.281597
Nfil3	1.70617	0.00435287	1.72299	0.00160833	1.17771	0.638582	1.29269	0.140826	Gap43	-1.50467	0.000614176	-1.51996	0.00185943	-1.18246	0.575	-1.10383	0.825844
Samsn1	1.17162	0.0633323	1.72299	0.000399566	-1.01592	0.99748	-1.00604	0.900339	Srrm4	-1.3007	0.0224293	-1.51904	0.0013312	1.10915	0.925073	-1.03686	0.877405
Gpr98	1.52488	0.00202713	1.71978	0.000358259	1.06229	0.916605	1.16766	0.239497	Odf2	-1.30746	0.000614176	-1.51887	0.000537359	1.07286	0.887153	1.0336	0.885335
Ifih1	1.17866	0.0536719	1.719	0.000899623	1.13058	0.419086	1.39291	0.109659	Sebox	-1.22826	0.0120846	-1.51874	0.000358259	-1.01144	0.99748	-1.09588	0.389407
Fli1	1.50815	0.000614176	1.71863	0.000358259	1.1462	0.562684	1.19767	0.123081	Porcn	-1.32271	0.00319369	-1.51806	0.000358259	1.00941	0.99748	-1.18936	0.0789091
Apcdd1	1.4862	0.00602255	1.71858	0.00133421	1.13662	0.695087	1.21814	0.0840732	Tmem201	-1.35918	0.00202713	-1.51448	0.000594703	1.07421	0.326643	-1.00849	0.896156
Zfp36l1	1.32765	0.0146756	1.71699	0.000987633	1.33207	0.539157	1.1778	0.154638	Lrrc3b	-1.33833	0.0897459	-1.51383	0.0156183	1.08721	0.99748	-1.10736	0.860639
Cdh10	1.50386	0.00194508	1.71675	0.000368758	-1.06421	0.972831	-1.02259	0.877701	Tm7sf2	-1.30742	0.0300284	-1.51378	0.00183899	-1.18624	0.549584	-1.38469	0.0118088
H2-Ab1	1.11792	0.220079	1.71588	0.00350646	-1.04518	0.900126	1.21061	0.394532	Mir181b-1	-1.16839	0.05439	-1.51355	0.00131201	1.18148	0.585181	-1.09999	0.848816
Trib3	2.2136	0.000614176	1.71576	0.000407494	1.27391	0.661632	1.23962	0.216021	St18	-1.21023	0.0213456	-1.51177	0.000612323	1.08439	0.99748	-1.27213	0.144304
Adap2	1.20141	0.0407777	1.71237	0.00128269	-1.01125	0.99748	-1.0173	0.89421	Car15	-1.1492	0.0407345	-1.51166	0.000550102	1.11066	0.938907	-1.0825	0.594835
Gsto1	1.35759	0.0123628	1.71176	0.000439464	1.03408	0.99748	1.07981	0.584361	Il20rb	-1.10234	0.221113	-1.51094	0.00131693	1.1807	0.99748	-1.03029	0.913363
Nnat	1.22436	0.129444	1.71126	0.000442753	-1.14007	0.646493	1.03256	0.868948	C530030P08Rik	-1.14984	0.00877357	-1.51092	0.000507286	1.08683	0.992878	-1.08993	0.509554
Tekt5	1.44613	0.112202	1.71099	0.00424161	-1.01813	0.99748	-1.09612	0.839863	Diras2	-1.13173	0.0580436	-1.51087	0.000360129	-1.02496	0.99748	-1.14097	0.0177114
Dock2	1.20707	0.028422	1.71045	0.000501069	1.02528	0.99748	1.05889	0.81528	Tmtc4	-1.15797	0.114112	-1.51002	0.00133029	1.29415	0.762182	1.03276	0.890574
Nop58	1.73538	0.00105896	1.70867	0.000358259	1.23589	0.563475	1.13672	0.813132	Ccdc74a	-1.59283	0.00171598	-1.50966	0.00197248	1.02947	0.99748	-1.13979	0.625487
Slc39a12	1.05092	0.34749	1.70744	0.000493444	-1.0009	0.99748	1.10559	0.322103	Cecr2	-1.28666	0.0162943	-1.50683	0.00183749	1.11036	0.890816	-1.07351	0.83861
Apobec1	1.0921	0.207264	1.70702	0.00255068	1.02046	0.99748	1.19631	0.133628	Dact1	-1.01375	0.506162	-1.50287	0.000789451	1.62878	0.625968	-1.02822	0.885594
Cd97	1.45256	0.00962473	1.70629	0.000550102	1.12452	0.603229	1.3528	0.0156656	Tgm5	-1.37358	0.00762355	-1.50233	0.000695465	-1.06554	0.972831	-1.01972	0.887363
Hist1h2ak	1.63631	0.00203033	1.70447	0.000358259	1.21115	0.474067	1.20322	0.0193531	Atp2b3	-1.17592	0.00882989	-1.50213	0.000452222	1.06997	0.958229	1.03744	0.813484
Tm4sf1	1.49053	0.000933927	1.7037	0.000358259	1.20014	0.512586	1.514	0.0214952	Sh3glb2	-1.38136	0.00435287	-1.50162	0.000358259	-1.10935	0.696094	-1.1482	0.0589196
Cldn5	1.78583	0.000614176	1.70364	0.0020159	1.40949	0.342894	1.21661	0.217219	Galnt9	-1.28954	0.000614176	-1.50129	0.000842243	-1.11881	0.60574	-1.10118	0.804676
Herc5	1.12983	0.0768498	1.70176	0.00174732	1.03206	0.99748	1.36174	0.060544	Ankrd56	-1.30182	0.0286078	-1.501	0.00188842	1.15628	0.99748	1.01001	0.894379
Cebpg	2.0597	0.000614176	1.70079	0.000358259	1.46014	0.376874	1.39947	0.0299242	Mus81	-1.60618	0.000614176	-1.49	0.00088548	1.00252	0.99748	-1.02307	0.842312
Fosb	1.37783	0.0685339	1.70018	0.00246195	1.09374	0.900126	1.57921	0.050978	Grk5	-1.51521	0.000614176	-1.48412	0.000368758	1.01117	0.99748	-1.04009	0.868327
Trp53	1.70969	0.000614176	1.69988	0.000617854	1.20279	0.458858	1.22082	0.0537749	Eno2	-1.526	0.00423826	-1.45925	0.000437336	-1.10501	0.66062	-1.11238	0.107709
Padi2	1.03888	0.420613	1.6989	0.000358259	-1.08186	0.972831	1.16946	0.145593	Cabp2	-1.65815	0.0021446	-1.45541	0.00216898	1.02103	0.99748	1.00699	0.913363
Slco1c1	1.72259	0.00202713	1.6984	0.000480694	1.04626	0.99748	1.34436	0.10063	Arhgef3	-1.6701	0.000614176	-1.45274	0.00151531	-1.12127	0.711338	1.02993	0.810572
Trim12	1.21289	0.0819092	1.69433	0.00171378	1.08886	0.880362	1.23517	0.526797	Mfsd4	-1.16684	0.0195287	-1.45273	0.000612323	-1.06158	0.807832	-1.54125	0.0255146
Nup43	1.6429	0.00114002	1.69235	0.000527593	1.31205	0.482669	1.17547	0.356173	B930041F14Rik	-1.51091	0.000801229	-1.43698	0.00323182	1.15028	0.746336	-1.05629	0.842974
Il10rb	1.25081	0.0191168	1.6889	0.000517509	1.03831	0.99748	1.20114	0.245825	Nt5c1a	-1.51318	0.00507682	-1.40904	0.000527593	-1.11278	0.602793	-1.40273	0.028405
Cpne6	1.51948	0.0623708	1.68711	0.0025008	-1.12337	0.868922	-1.09199	0.0637365	Pisd-ps1	-1.72932	0.00604339	-1.36379	0.180781	-1.35127	0.548089	-1.24905	0.833242
Cp	1.31231	0.01541	1.68607	0.00105163	1.11771	0.807924	1.36486	0.0863356	Mpp7	-1.50277	0.00961748	-1.35483	0.0466643	1.32963	0.858208	1.14882	0.606316
Gpr116	1.42066	0.000614176	1.68602	0.000358259	1.2156	0.435031	1.25901	0.0579648	Gtpbp2	-1.46026	0.0017332	-1.35186	0.00292631	-1.79428	0.0384267	-1.62032	0.00371524
Eprs	1.78407	0.000614176	1.68568	0.000358259	1.3815	0.464208	1.47322	0.00477938	Atp2b4	-1.74943	0.000614176	-1.35003	0.00444889	-1.11508	0.69574	-1.01948	0.902416
Stard5	1.68182	0.000614176	1.68461	0.000358259	1.142	0.512525	1.45819	0.00887299	Mgst3	-1.60271	0.00305893	-1.34776	0.00164036	-1.17871	0.418156	-1.28204	0.0797591
Hist1h1c	1.29684	0.0155518	1.68338	0.000897048	-1.02141	0.99748	1.2908	0.358577	E530001K10Rik	-1.5163	0.00227423	-1.34585	0.00689533	1.12764	0.97504	1.07622	0.535936
Gm6394	1.22134	0.180198	1.68275	0.00141862	1.1054	0.881864	1.09435	0.878065	Gm9753	-1.07894	0.301781	-1.2861	0.003722	-1.04355	0.99748	-1.51387	0.0482074
Slc3a2	1.82309	0.000614176	1.68203	0.000358259	1.36214	0.405334	1.46101	0.00362582	Gcnt1	-1.58702	0.00796242	-1.27027	0.0438627	1.02395	0.99748	1.03285	0.819892
Prelp	1.40302	0.0103842	1.68094	0.000480512	1.11222	0.923221	1.59796	0.035521	Dio2	-1.55904	0.000833372	-1.23013	0.0955519	-1.19378	0.596052	-1.45988	0.0619044
Abhd4	1.19522	0.0156398	1.68086	0.000358259	1.16948	0.349865	1.13277	0.0542485	Tdo2	1.03336	0.486981	-1.21963	0.00647906	-1.34713	0.575	-1.98154	0.0156656
Soat1	1.18895	0.0729279	1.67806	0.000358259	-1.03807	0.99748	1.02673	0.878342	Trpc6	-1.08684	0.0939663	-1.20819	0.00536962	-1.15885	0.865238	-1.5214	0.0282461
Rgs10	1.17118	0.0627099	1.67776	0.000453111	-1.00923	0.99748	-1.15529	0.12597	Clic1	-1.52166	0.00374828	-1.16449	0.00354163	1.08831	0.924926	1.15687	0.0430621
Ptpro	1.16706	0.180242	1.67331	0.00113693	-1.22885	0.678242	-1.13129	0.0926793	Plin2	-1.52159	0.00194508	-1.156	0.0126659	1.08192	0.85582	1.13627	0.255818
Rgs4	1.27029	0.113076	1.67329	0.00160247	-1.23534	0.603229	-1.1391	0.237831	Rfx3	-1.06779	0.232155	-1.1453	0.0370368	-1.38796	0.482669	-1.51132	0.00610618
Crip2	1.36268	0.00877357	1.67233	0.000370907	-1.0964	0.896215	1.0899	0.575331	Ubash3b	-1.11483	0.0149878	-1.13656	0.0160884	1.00178	0.99748	-1.56203	0.0221142
Ly6a	1.31604	0.014866	1.67231	0.000978585	1.28648	0.124383	1.16237	0.358606	Akr1c18	-1.07884	0.168351	-1.1121	0.0883355	-1.40682	0.486784	-2.02025	0.00390214
Tbxas1	1.00535	0.57483	1.67039	0.00110718	-1.04602	0.987754	1.00924	0.89543	3110082D06Rik	-1.11166	0.0616101	-1.08871	0.125158	-1.11283	0.99748	-1.52705	0.043576
Efemp1	1.20927	0.0347588	1.66989	0.000391984	1.03839	0.99748	1.18432	0.354344	Lct	-1.05261	0.246827	-1.08073	0.16563	-1.64372	0.412085	-1.94751	0.0221142
Hpgd	1.04319	0.368268	1.66988	0.000358259	1.0018	0.99748	1.01814	0.896178	Krt73	1.02995	0.37398	-1.06841	0.162498	-1.25452	0.5278	-1.58248	0.0379836
AF529169	1.62437	0.000614176	1.66816	0.000358259	1.29879	0.682546	1.06957	0.707033	Zcchc5	1.00223	0.592261	-1.06334	0.185451	-1.75335	0.231576	-2.17625	0.0195285
Vwa5a	1.16056	0.0803742	1.66774	0.00046256	1.03035	0.99748	1.16011	0.136859	Olfr46	-1.02092	0.515256	-1.05947	0.144709	-1.25607	0.822609	-1.61856	0.0410069
Gm5502	1.14014	0.347268	1.66682	0.0020526	-1.03719	0.99748	1.13029	0.816839	Hapln1	1.00033	0.584553	-1.05048	0.278244	-1.32855	0.506804	-1.72391	0.00477938
Ass1	1.26174	0.08212	1.66616	0.00168899	1.13739	0.882798	1.27753	0.169328	Cpne9	-1.24194	0.0118679	-1.04889	0.193529	-1.01778	0.99748	-1.62157	0.026358
Resp18	1.29378	0.154127	1.6656	0.0188525	-1.13429	0.850646	-1.07958	0.853244	Olfr539	-1.07224	0.180104	-1.03602	0.280012	-1.40715	0.473401	-1.51409	0.0133926
Gpr137b	1.35377	0.144361	1.65986	0.000358259	1.21617	0.99748	1.30781	0.7542	Opn3	-1.50314	0.0148501	1.00085	0.365364	1.2171	0.930107	1.13318	0.227616
P2ry6	1.15212	0.0612814	1.65821	0.000358259	1.06237	0.725225	-1.01574	0.899012	Ntf3	1.06232	0.362939	1.0354	0.336364	-1.02688	0.99748	-1.76821	0.0168676
Slc9a9	1.53045	0.000614176	1.658	0.000358259	1.15352	0.583294	1.12964	0.109607	Npy2r	-1.00391	0.583278	1.06179	0.139565	-1.31951	0.625968	-1.62837	0.0240793
Clvs2	1.26089	0.155789	1.6579	0.00672325	-1.30036	0.607918	-1.31014	0.0443845	Yjefn3	1.14701	0.145969	1.13645	0.0176333	-1.13781	0.6611	-1.53645	0.0151273
Odz4	1.2775	0.0359943	1.65492	0.000499387	-1.06328	0.992878	1.2618	0.0718848	Fxyd7	1.13118	0.232005	1.18635	0.0170988	-1.28451	0.541138	-1.63133	0.0299242
Vgf	1.34685	0.0281148	1.65479	0.000904574	-1.06378	0.994895	1.28984	0.0506745	Htr2a	1.07031	0.414179	1.21765	0.0624759	-1.43559	0.342894	-1.61866	0.0151063
Nudt11	1.17571	0.0710142	1.65359	0.00196553	1.0475	0.99748	-1.21089	0.659781	Plekha2	1.19409	0.0199737	1.26013	0.00536962	-1.40097	0.497435	-1.55467	0.019532
Dhrs7	1.62084	0.000614176	1.6527	0.000437336	1.28378	0.36134	1.56591	0.00514996	Npnt	1.34199	0.0207301	1.49848	0.00224845	-1.19593	0.680072	-1.58848	0.00691613
Slco2b1	1.28326	0.00651522	1.65209	0.000664739	1.03353	0.991954	1.07065	0.438833	6330527O06Rik	1.15569	0.218803	1.87697	0.0677282	-1.33933	0.570975	-1.73919	0.030663
Plp2	1.25333	0.0185663	1.65197	0.000614479	1.12708	0.704815	1.36173	0.0354389
Lmo4	1.59205	0.00472249	1.65052	0.000358259	-1.07805	0.970201	-1.06341	0.464282
Gpx8	1.15718	0.16246	1.64998	0.00441441	-1.04075	0.99748	1.59193	0.0930459
Ifi44	1.04263	0.439124	1.64953	0.00372809	1.05624	0.972831	1.38847	0.607572
Csf1	1.19255	0.0102122	1.64843	0.000358259	1.10942	0.734507	1.09729	0.545427
Depdc6	1.45729	0.00399767	1.64655	0.000358259	1.0422	0.972831	1.26062	0.0878396
Cnn2	1.51695	0.00319369	1.64556	0.000933943	1.07245	0.822095	1.17573	0.237831
Hap1	1.4608	0.029473	1.64444	0.000832095	-1.13517	0.578308	-1.01953	0.893016
Kcnh5	1.55903	0.0727776	1.64439	0.00825278	-1.09632	0.906129	-1.20089	0.430644
Slc2a4	1.42909	0.00580776	1.64173	0.00501675	1.08777	0.986109	1.07389	0.836707
Nudt10	1.34535	0.0279211	1.64126	0.00231236	1.00409	0.99748	-1.00557	0.905215
Ucp2	1.55094	0.000933927	1.64095	0.000517509	1.09282	0.94146	1.27309	0.142567
Mgst1	1.34356	0.0132663	1.64072	0.000407494	1.15897	0.765117	1.29392	0.0874596
Lair1	1.05302	0.314743	1.6398	0.000990148	1.06245	0.980629	-1.05743	0.739582
Ldb2	1.53479	0.0635696	1.63962	0.00615901	-1.08882	0.87002	1.0513	0.891788
Wdr17	1.26821	0.0232764	1.63867	0.000453111	-1.04919	0.99748	-1.10765	0.74493
Thbs1	1.4558	0.0110585	1.63794	0.00110743	1.21346	0.66397	1.2732	0.342734
Cdh5	1.41728	0.00194508	1.63703	0.000358259	1.14675	0.596052	1.26262	0.0878396
Selplg	1.00741	0.575705	1.63679	0.000597262	-1.24495	0.576275	-1.10878	0.268952
Mustn1	1.41763	0.000614176	1.63631	0.00121802	1.22136	0.576275	1.27147	0.0711322
Phyhd1	1.30084	0.0168763	1.63603	0.000819832	1.11094	0.603229	1.21517	0.0698773
Hrsp12	1.15327	0.0677548	1.63541	0.00036791	1.17775	0.565476	1.08246	0.363674
Npas2	1.25036	0.0441524	1.63466	0.00294523	-1.10821	0.853989	-1.00992	0.901489
Evi2a	1.17555	0.00674578	1.6343	0.000358259	1.09728	0.828877	1.17122	0.166246
Agt	1.14101	0.0732435	1.63233	0.000657432	1.13088	0.963323	1.21859	0.126526
Gm7691	1.11136	0.460308	1.63227	0.00215422	1.02221	0.99748	-1.22898	0.28483
Nkd1	1.52404	0.0017332	1.63163	0.000358259	1.1766	0.572068	1.10255	0.211897
Atf4	1.75706	0.000614176	1.63127	0.000358259	1.84145	0.0321592	1.74076	0.00362582
Capg	1.22567	0.0418454	1.63085	0.000358259	1.03825	0.99748	1.22451	0.167891
Rin2	1.23629	0.0458142	1.63054	0.000358259	-1.03147	0.99748	1.01576	0.891732
Ostn	1.13715	0.0848224	1.62952	0.00306206	1.10333	0.676485	1.44872	0.040432
Cbln2	1.504	0.0960794	1.62932	0.0181635	-1.02083	0.981754	-1.11426	0.814064
Rbp4	1.0891	0.275951	1.62619	0.00294015	-1.07555	0.856454	1.31629	0.354626
Prl2c3	1.17563	0.342653	1.62575	0.0166569	1.09246	0.910085	1.01633	0.780023
Esam	1.53515	0.00202713	1.6256	0.000407494	1.16246	0.580178	1.28217	0.0412595
Tor3a	1.43634	0.00422136	1.62417	0.00215339	1.12496	0.71109	1.28286	0.152404
Abcb1a	1.25201	0.0205024	1.6241	0.000392582	1.23442	0.358844	1.23668	0.0567567
Prkch	1.18877	0.0940926	1.62382	0.000668964	1.02636	0.99748	1.20016	0.0290864
Il33	1.21452	0.0586032	1.62333	0.00149855	1.00937	0.99748	1.22576	0.0949316
Sars	1.92284	0.000614176	1.62268	0.000358259	1.41711	0.288851	1.66282	0.00372501
Chrna4	1.27943	0.104378	1.62143	0.00235808	-1.1537	0.779711	-1.20857	0.523399
Chrm3	1.11752	0.38927	1.61994	0.0130106	-1.17101	0.816337	-1.22773	0.0657182
Camkv	1.34282	0.165153	1.61989	0.0268695	-1.11769	0.927073	-1.0344	0.807682
Aqp4	1.06997	0.160365	1.61764	0.000358259	1.09404	0.99748	-1.13035	0.154577
Wars	1.34252	0.00472249	1.61677	0.000358259	1.06712	0.603229	1.22754	0.011244
Gvin1	-1.03208	0.449019	1.61463	0.0050285	-1.02297	0.99748	1.1575	0.833242
S1pr3	1.32823	0.00773445	1.61249	0.000554184	1.05501	0.980629	1.16943	0.310524
Prcp	1.30258	0.028422	1.61198	0.000427303	1.14159	0.625968	1.05367	0.827841
1700048O20Rik	1.40656	0.0515465	1.60976	0.0151429	1.41942	0.385017	1.69715	0.167054
Pqlc3	1.26567	0.0855643	1.60937	0.00104923	1.07683	0.949144	1.38389	0.0267858
Lonp1	1.51105	0.0021446	1.60824	0.000358259	1.13922	0.565476	1.46344	0.00887299
Epb4.1l2	1.17552	0.000833372	1.60655	0.000358259	-1.04713	0.99748	1.02317	0.871828
Plagl1	1.22608	0.0431921	1.60639	0.000922349	1.07267	0.994233	1.34441	0.0318631
4632428N05Rik	1.05475	0.21378	1.60619	0.000559494	-1.11279	0.667647	-1.01507	0.887363
Gca	1.42024	0.0227814	1.60616	0.000617854	-1.08273	0.983666	1.10186	0.551642
1700028P14Rik	1.51775	0.0148738	1.60521	0.00100547	1.40359	0.469628	2.37125	0.00372501
Itgb2	1.11463	0.0408886	1.60506	0.000498915	1.05425	0.905959	-1.00422	0.905215
Tlr3	1.08159	0.17007	1.60461	0.000578656	1.05243	0.992878	1.05784	0.820115
Myl9	1.27769	0.0106008	1.60425	0.000590082	1.19706	0.373056	1.32086	0.0926793
Neto1	1.2177	0.129962	1.6037	0.0100193	-1.13438	0.865238	-1.19148	0.0146657
Ctla2a	1.67312	0.00397398	1.60347	0.00434989	1.17042	0.680072	1.08498	0.602835
Gabra3	1.22473	0.164263	1.60301	0.0356231	-1.12447	0.731461	-1.14211	0.831855
Extl1	1.76108	0.00307913	1.60047	0.0003929	1.08118	0.961005	-1.08801	0.417182
Fam19a1	1.55188	0.0906617	1.5993	0.0227573	-1.17516	0.762182	-1.2843	0.0151273
Ccdc3	1.11108	0.15376	1.59721	0.00137952	-1.07305	0.954168	-1.09263	0.62788
Kctd4	1.19834	0.0237183	1.59699	0.00856427	-1.13182	0.857577	-1.28948	0.019532
Nxph4	1.54827	0.0105679	1.59515	0.000783257	1.44859	0.697304	1.2313	0.586122
Vav1	1.02136	0.540623	1.59455	0.000368758	-1.09137	0.886924	-1.01393	0.883373
St8sia6	1.11659	0.0783462	1.59338	0.000360129	-1.09407	0.886924	-1.1709	0.349569
Nfe2l2	1.21144	0.0458688	1.59314	0.000358259	1.10806	0.850439	1.21121	0.239705
Lrrc8d	1.67333	0.000614176	1.59299	0.000358259	1.05926	0.848937	1.11637	0.0863342
Sulf1	1.30305	0.0452391	1.59261	0.000614479	-1.1075	0.99748	1.70316	0.178974
Gm885	-1.01523	0.517472	1.59107	0.000439464	1.00499	0.99748	1.03114	0.812841
Gm8936	-1.03033	0.535199	1.59093	0.00672325	-1.11431	0.921564	1.0552	0.868588
Slit2	1.20342	0.119122	1.58643	0.0109569	-1.26864	0.617282	-1.04282	0.843271
Tspan6	1.20215	0.0224106	1.58639	0.000476904	-1.05363	0.98368	1.00563	0.91279
Klhl6	1.24449	0.0420844	1.58508	0.000922349	1.0063	0.99748	-1.08018	0.606316
Pamr1	1.09332	0.110079	1.5833	0.000740724	-1.06593	0.783646	1.07108	0.863004
Kcnk6	1.29748	0.0312888	1.58232	0.000908696	-1.07032	0.869953	-1.00466	0.905997
Cmbl	1.18962	0.127115	1.58198	0.000744007	-1.14847	0.771367	-1.15382	0.738923
Rrs1	1.38189	0.0255436	1.58051	0.000438364	1.12926	0.691418	1.18269	0.572321
Cachd1	1.10719	0.284859	1.58001	0.000463745	-1.14895	0.82395	1.05124	0.812841
Gng4	1.19998	0.0871997	1.57971	0.00146231	-1.01459	0.99748	1.16352	0.146944
Clec2d	1.02129	0.556653	1.57796	0.00761035	1.14329	0.226762	1.20838	0.10775
Gfra1	1.27946	0.153283	1.57777	0.00674559	-1.25301	0.576275	-1.2251	0.0532314
Cpxm2	1.10403	0.152297	1.57756	0.000675068	-1.05871	0.968135	1.11694	0.65382
Tprkb	1.1444	0.0366579	1.57727	0.000493444	1.21746	0.407553	1.08266	0.432434
Odc1	1.27788	0.0145097	1.57391	0.00143104	1.04352	0.99748	1.2091	0.546051
Chrm2	1.25983	0.188109	1.57326	0.0265237	-1.01217	0.99748	1.02354	0.905997
Ceacam1	1.20818	0.0886998	1.57202	0.00396767	1.00061	0.99748	1.32605	0.0718848
Trim25	1.1442	0.0886173	1.57084	0.000924339	1.06402	0.868552	1.2572	0.0772449
Ptges	1.34916	0.00877974	1.57007	0.000453111	1.05315	0.992683	1.14065	0.457775
Bhlhe41	1.26348	0.00688162	1.56927	0.000724307	1.1733	0.687052	1.01557	0.914907
Dbpht2	1.55149	0.00705035	1.56768	0.000612323	-1.13823	0.888754	-1.2934	0.0870485
Ppp2r5a	1.52045	0.00737048	1.5671	0.000493444	1.09227	0.992653	1.10301	0.718624
Myof	1.35645	0.0019479	1.5662	0.000473433	1.01544	0.99748	1.38515	0.0490952
Rxrg	1.19002	0.102056	1.56604	0.00294015	-1.18382	0.64297	1.17621	0.497585
Gusb	1.16705	0.0563796	1.56585	0.00046256	1.04001	0.682013	1.06394	0.400063
Cd37	1.11633	0.16753	1.56514	0.00119949	-1.02898	0.99748	-1.01082	0.89047
Sema3d	-1.04816	0.430895	1.56496	0.000438364	-1.12154	0.861629	-1.12282	0.523122
H2-DMa	1.05289	0.371246	1.56389	0.000368758	-1.09047	0.972831	-1.09928	0.528723
Gm12643	1.05334	0.543376	1.56367	0.00430589	1.07808	0.99748	-1.1174	0.73027
Gm6548	1.09954	0.366259	1.56343	0.00314954	1.03732	0.992878	1.16541	0.120479
Maob	1.38991	0.014051	1.56284	0.00168779	-1.03275	0.99748	1.13768	0.30207
Gm15470	1.16863	0.0632528	1.56232	0.000531455	-1.01516	0.99748	1.11787	0.761997
Hax1	1.63489	0.000614176	1.56201	0.000358259	1.27741	0.36134	1.49	0.0226222
Suclg2	1.16385	0.146818	1.56017	0.000697662	1.06875	0.958073	1.12634	0.234658
Itga1	1.49976	0.00441697	1.55883	0.000362903	1.34468	0.349865	1.35447	0.0312634
AI504432	1.16643	0.0929969	1.55859	0.00267546	-1.07398	0.856454	-1.20183	0.528723
Apoe	1.04236	0.410069	1.55848	0.000358259	-1.04474	0.842961	1.01637	0.838424
Pecam1	1.60011	0.00305893	1.55815	0.00168737	1.3093	0.429402	1.22665	0.0312813
Bmp2k	1.23156	0.0051195	1.55791	0.000439464	1.16977	0.740399	1.18965	0.0837981
Tcn2	1.17718	0.0340974	1.55778	0.00143846	-1.0227	0.99748	1.42786	0.203826
Ctxn1	1.31402	0.0719338	1.55761	0.00114333	-1.10691	0.90482	-1.2005	0.0115707
Tanc2	1.3122	0.0231451	1.55719	0.00121892	-1.02419	0.99748	1.00455	0.9027
Ifi27l1	1.09255	0.297743	1.55682	0.003662	-1.01209	0.99748	1.56967	0.102914
D830030K20Rik	1.21592	0.132604	1.55562	0.00937375	1.0474	0.99748	1.15272	0.834306
Slc7a2	1.06659	0.273891	1.55528	0.000358259	-1.11538	0.752242	-1.10952	0.441391
Arhgef2	2.37314	0.000614176	1.5551	0.000404149	1.2687	0.445059	1.23643	0.0144881
Stab1	1.25378	0.0255436	1.5546	0.000358259	-1.01148	0.99748	1.03515	0.817123
Palmd	1.44507	0.00651522	1.55426	0.000358259	-1.27135	0.445733	-1.22149	0.0384217
Itih5	1.06935	0.228928	1.554	0.00166901	1.22503	0.469261	1.12961	0.535335
Cd38	1.21214	0.0216506	1.55291	0.000391984	1.22402	0.428712	-1.07544	0.33823
Rgs5	1.58556	0.00202713	1.55052	0.000500887	1.15033	0.680072	1.12946	0.434758
Vcam1	1.08103	0.241019	1.55014	0.000616043	-1.02099	0.99748	1.26276	0.397962
Stxbp6	1.32357	0.0872054	1.54935	0.00355524	-1.02663	0.99748	-1.10858	0.338975
Lcp2	1.2943	0.0104979	1.54929	0.000611448	-1.00685	0.99748	-1.03014	0.824398
Th	1.31099	0.014654	1.54827	0.000527593	1.28924	0.890434	1.20237	0.554607
Soat2	1.2601	0.0206574	1.54744	0.00282267	1.05537	0.99748	1.02599	0.880186
Mir135a-2	1.76888	0.00374828	1.54653	0.00469816	1.0354	0.954007	1.06291	0.768158
Tcfap2d	1.5015	0.130049	1.54651	0.033586	1.10417	0.984353	1.03744	0.877405
Lrrc7	1.29345	0.133291	1.54484	0.0119619	-1.10692	0.920349	-1.15297	0.157213
Pex11a	1.23926	0.00951055	1.54378	0.000358259	-1.07815	0.955957	1.1307	0.61218
Gm11275	1.38228	0.0272765	1.54345	0.00746783	1.13145	0.717891	1.06138	0.857525
Irf8	1.04919	0.38333	1.54282	0.000394698	-1.0042	0.99748	-1.00087	0.911267
Necab2	1.11255	0.39006	1.54151	0.00883393	-1.1651	0.838645	-1.01621	0.89744
Slit1	1.36647	0.114593	1.53946	0.011479	-1.15531	0.852462	-1.09232	0.149423
Gm3696	1.206	0.0433842	1.53935	0.00289279	1.07137	0.99748	1.08282	0.879696
Sncg	1.21629	0.0527359	1.53862	0.00950017	1.04719	0.989413	1.04965	0.890773
Csf3r	1.02442	0.466669	1.53856	0.00146063	1.00797	0.99748	1.09595	0.462951
Tgfbr2	1.16135	0.0509457	1.53742	0.000827465	1.06088	0.866063	1.16714	0.273335
Pxdn	1.31701	0.00836305	1.53726	0.000903404	-1.08647	0.977327	-1.06393	0.787251
Mars	1.93632	0.000614176	1.53705	0.00036791	1.63596	0.115026	1.74621	0.00390214
Naf1	1.33328	0.00608911	1.53693	0.000550102	-1.01404	0.99748	-1.08677	0.848789
5430435G22Rik	1.14223	0.0892734	1.53603	0.00102727	-1.01578	0.99748	1.09665	0.695473
Gbp6	1.2067	0.0293701	1.53587	0.0113093	1.04553	0.99748	1.32627	0.0988385
Dtx3l	1.18129	0.00767088	1.53566	0.00177568	1.10563	0.697304	1.10032	0.403322
Mina	1.2774	0.00651522	1.53516	0.00042838	-1.10961	0.858291	1.05561	0.765379
Anxa4	1.14458	0.0422729	1.53474	0.00255908	1.04653	0.99748	1.14576	0.283628
Tbrg1	1.37277	0.000614176	1.534	0.000441376	1.10173	0.407553	1.27364	0.0156656
Slc14a1	1.07918	0.053431	1.53367	0.000606796	1.12244	0.641062	1.07587	0.816583
Nop14	1.4847	0.00189545	1.5336	0.000482839	1.18663	0.541138	1.28045	0.189921
Lmo2	1.42807	0.00319369	1.53355	0.000850299	1.10264	0.556329	1.09708	0.564253
Prkar2b	1.30637	0.0354155	1.53316	0.00704203	-1.11642	0.858647	-1.06728	0.625601
Axl	1.10733	0.123608	1.53313	0.000362903	1.02127	0.99748	1.00026	0.914907
Gm10561	1.24031	0.0527188	1.53295	0.000550102	1.02763	0.99748	1.38247	0.227016
Smyd5	1.24151	0.0508196	1.53286	0.000664739	-1.03702	0.99748	1.06545	0.844388
Pid1	1.1934	0.0553091	1.53217	0.00338119	-1.0505	0.963323	1.00653	0.911029
Glce	1.36635	0.0132787	1.53138	0.000453111	1.41863	0.67325	1.15457	0.108823
Igfbp7	1.53688	0.000614176	1.53013	0.000675068	1.18817	0.680072	1.40741	0.0768822
Pam	1.18018	0.21321	1.5296	0.00675863	-1.12364	0.865238	1.03513	0.421795
Ednrb	1.06471	0.125842	1.5295	0.000358259	1.11025	0.992878	1.04829	0.844605
Hmgcs2	1.33806	0.0179953	1.52941	0.014567	1.13209	0.719191	1.22641	0.53627
Irf7	1.09444	0.224073	1.52896	0.00714552	1.08468	0.992168	1.1005	0.834306
Rimklb	1.2738	0.00481215	1.52805	0.000506686	-1.03706	0.99748	-1.03876	0.879696
Cxadr	1.37047	0.00313118	1.52676	0.000360129	-1.01312	0.99748	1.13743	0.0665881
Bgn	1.28339	0.000614176	1.52664	0.000517509	1.12696	0.604671	1.4208	0.145688
Tshz2	1.28063	0.0943667	1.52643	0.00862414	1.06641	0.99748	1.3178	0.763216
Podxl	1.29618	0.0223463	1.52601	0.000990709	1.06707	0.879588	1.10594	0.456746
Srebf1	1.11733	0.151537	1.52594	0.000358259	1.02616	0.99748	1.13264	0.296036
Ccdc141	1.13955	0.168168	1.5243	0.00710906	-1.02182	0.99748	1.20349	0.897127
Zkscan16	1.49155	0.0656153	1.52426	0.0298003	-1.00905	0.99748	-1.07839	0.854272
St6galnac5	1.29165	0.0424291	1.52369	0.0026672	-1.14233	0.83328	-1.20341	0.175298
Fam189a2	1.11616	0.168233	1.52343	0.00182938	1.05308	0.941248	1.16966	0.0906757
Lipa	1.09377	0.164087	1.52241	0.00208507	1.00643	0.99748	1.15134	0.230391
Frmd4b	1.18755	0.0464684	1.52201	0.000723435	-1.04471	0.99748	1.06106	0.445836
Gm10406	1.20459	0.0523372	1.52141	0.00440263	1.04348	0.99748	1.10674	0.883866
Kcne1l	1.05935	0.115371	1.5213	0.00196553	1.01874	0.99748	1.0925	0.814064
Arhgap29	1.28747	0.0100677	1.52001	0.000657432	1.13105	0.717344	1.14021	0.0639075
Cav1	1.25466	0.0371254	1.51929	0.00126779	1.06899	0.923221	1.07628	0.375069
Mtbp	1.8763	0.00112268	1.51915	0.000362968	1.42364	0.576275	1.46494	0.0133926
Gm11277	1.233	0.0255436	1.51895	0.000650588	1.00618	0.99748	1.07414	0.62726
Meig1	1.2024	0.0890655	1.51824	0.00571437	-1.00203	0.99748	1.08483	0.836707
Thbd	1.11614	0.158325	1.5178	0.0103502	-1.04907	0.992031	1.20362	0.322772
Gpr56	1.14127	0.17181	1.51572	0.000360129	-1.1293	0.57835	1.00032	0.914907
Lbh	1.08096	0.294475	1.5143	0.000611547	-1.03769	0.966992	1.01202	0.882139
Tgfb1	1.20016	0.0687244	1.514	0.000358259	1.05197	0.963323	1.04498	0.253362
Pln	-1.04171	0.481356	1.5134	0.00461251	1.15651	0.513948	1.30564	0.413985
Bche	1.23706	0.0405784	1.51246	0.00457757	1.26645	0.562684	1.25517	0.0914085
Qpct	1.188	0.0485758	1.51218	0.00431076	-1.07728	0.970201	1.01347	0.905269
Mir703	1.17528	0.10333	1.51196	0.000617854	1.08367	0.992878	1.1769	0.201452
Cxcl16	1.06599	0.284263	1.5108	0.00165747	1.09927	0.826317	1.15743	0.508643
Serpinb9	1.17976	0.0348908	1.51064	0.0038944	1.01083	0.99748	1.15222	0.0446011
Cyr61	2.1221	0.0257515	1.51016	0.0495873	1.21843	0.603229	1.35954	0.117887
Pon3	1.25042	0.0737584	1.50974	0.00645831	-1.01833	0.99748	1.46296	0.134858
Lap3	1.2838	0.00435287	1.50967	0.000373353	1.07461	0.611073	1.03363	0.872146
Sv2c	-1.21667	0.0385807	1.50942	0.000418494	1.19339	0.966458	-1.20636	0.161018
Sft2d2	1.17814	0.0239325	1.50921	0.000358259	-1.01373	0.99748	1.19472	0.0639075
Tmem140	1.12621	0.0741841	1.50745	0.00174016	-1.06207	0.876636	1.12121	0.25142
Fmo1	1.1054	0.135109	1.50735	0.000536434	-1.09086	0.868922	1.15029	0.200524
P2ry14	1.16747	0.0427571	1.50678	0.000725596	1.10974	0.726504	1.21785	0.03521
Tnfaip6	1.25865	0.031824	1.50618	0.00505378	1.20819	0.603229	1.20466	0.274014
P2ry12	1.25092	0.0286078	1.50542	0.00216237	-1.08494	0.871324	-1.06323	0.555131
Pnp	1.11181	0.250451	1.50534	0.00281652	-1.01137	0.99748	1.14649	0.282041
Lgi2	1.20326	0.0226399	1.50505	0.000358259	1.3232	0.497435	1.24103	0.476386
Slc25a18	1.05529	0.475451	1.50503	0.000394698	-1.19471	0.189556	-1.12641	0.159441
Dus4l	1.36176	0.0130307	1.505	0.00301943	1.11465	0.888085	1.2014	0.448814
4930555G01Rik	1.17534	0.0963838	1.50478	0.00320205	1.05391	0.986109	1.13071	0.764352
Isg20	1.54073	0.00580776	1.50419	0.00135755	1.50082	0.34547	1.30975	0.0501838
Phlda3	1.0735	0.433623	1.50414	0.00196137	-1.04268	0.99748	1.17746	0.129768
Naip5	1.06515	0.319092	1.50396	0.000476904	-1.00676	0.99748	1.02647	0.812083
Pcdh19	1.22197	0.0403718	1.50374	0.0023274	-1.18614	0.804893	-1.18585	0.299053
Ifi30	1.34833	0.004411	1.50194	0.000373666	1.12691	0.532763	1.31937	0.0376255
Pllp	1.10676	0.258588	1.50184	0.00399461	1.05801	0.994233	1.11501	0.797595
Sh3kbp1	1.12171	0.143383	1.50184	0.000453111	-1.12117	0.793591	-1.07688	0.381086
Nol8	1.54443	0.0021446	1.49518	0.000362968	1.09417	0.808218	1.02672	0.897855
Adh1	1.52224	0.00423948	1.4917	0.0279885	1.18738	0.850178	1.79055	0.0809202
Trank1	1.69664	0.000614176	1.49	0.0003929	1.04183	0.99748	-1.04591	0.859729
Ak7	1.4967	0.0021446	1.47912	0.000975751	1.11806	0.990842	1.54483	0.0416579
Nr4a3	2.36717	0.0308302	1.46537	0.0420215	-1.05691	0.99748	-1.00366	0.909631
Slc16a4	1.57045	0.004411	1.4598	0.00105199	1.15458	0.870071	1.42663	0.026358
Etv5	1.75379	0.00583833	1.45765	0.0061468	1.03484	0.99748	1.09687	0.759103
Etf1	1.53397	0.00423826	1.45104	0.000358259	1.17318	0.588907	1.08567	0.74332
Aars	1.62461	0.000614176	1.44442	0.000358259	1.45823	0.0701559	1.49809	0.00362582
Dusp4	2.31823	0.000614176	1.44437	0.01207	-1.13607	0.665736	-1.00793	0.913363
Spry4	2.44345	0.000614176	1.44274	0.0267856	1.07851	0.953929	1.16053	0.532735
Aplnr	1.74528	0.00506934	1.43558	0.00313703	1.22053	0.59869	1.28733	0.0597932
Nampt	1.50767	0.00472531	1.43088	0.000501069	1.12128	0.615417	1.06813	0.761092
Fn1	1.50859	0.00210124	1.38985	0.00157429	1.18171	0.646493	1.22331	0.241396
Lgr5	1.72984	0.00202713	1.37649	0.000980266	1.81497	0.721072	-1.02798	0.836707
Nrg3	1.64043	0.000933927	1.37463	0.00100547	-1.06373	0.968718	-1.01864	0.890718
Npas4	2.0117	0.0473567	1.36628	0.0453114	1.27425	0.597978	1.25537	0.812083
Atf5	1.92511	0.00181916	1.36184	0.00125724	1.28932	0.405334	1.35255	0.0285016
Gm11517	1.52263	0.00326355	1.35969	0.0103216	-1.00094	0.997538	1.13509	0.559904
Fosl2	1.67285	0.0280434	1.35563	0.010804	-1.09225	0.835362	1.00069	0.9134
Syde1	1.25134	0.00774412	1.35256	0.002548	1.30607	0.3071	1.64745	0.00887299
Bcl6b	1.68273	0.00456479	1.35012	0.00378281	1.15099	0.634089	1.15406	0.433934
Nr4a2	2.60417	0.011381	1.34453	0.101235	1.1019	0.528497	1.06019	0.879703
Pglyrp1	1.53838	0.00194508	1.3391	0.0931794	1.23435	0.426821	1.06023	0.896178
Atxn2l	1.5956	0.000614176	1.33793	0.000409467	1.36883	0.347468	1.29194	0.00684494
Slc6a9	1.28991	0.00374828	1.33485	0.000358259	1.5576	0.376874	1.65381	0.00362582
Fam84b	1.60603	0.0037234	1.33456	0.00170593	-1.02113	0.99748	1.00061	0.914907
Kctd15	1.56059	0.00374828	1.33362	0.00180654	1.18505	0.426498	1.37027	0.0149042
Ssbp2	1.52262	0.000614176	1.3258	0.000358259	1.08537	0.682013	1.01036	0.902426
Art3	1.50513	0.000614176	1.32356	0.00255109	1.09839	0.869585	1.08534	0.748969
Kdr	1.83664	0.000614176	1.31562	0.00214206	1.3476	0.211322	1.26012	0.173204
Rsph4a	1.30981	0.00906108	1.31204	0.0263546	1.01666	0.99748	1.50173	0.0461754
2310014L17Rik	1.52047	0.00843185	1.30938	0.00774997	1.10816	0.989413	1.05466	0.87989
Prrg4	1.14869	0.242753	1.30348	0.0269445	-1.03769	0.99748	1.55253	0.00675211
Tc2n	1.16927	0.154977	1.30259	0.0586806	-1.00827	0.99748	1.9096	0.0312813
Capsl	1.10809	0.282802	1.29902	0.0252249	-1.09976	0.992878	1.55089	0.0353055
Prr15	1.84422	0.000614176	1.2934	0.0749225	1.26708	0.850278	-1.02804	0.868948
Bdnf	1.70576	0.000614176	1.28524	0.00314772	-1.01889	0.99748	1.08365	0.497045
Dach2	1.53439	0.0147558	1.28395	0.00369044	1.07276	0.878979	1.05265	0.806921
Ephx3	1.65008	0.000614176	1.27493	0.00518906	1.14831	0.900126	1.09912	0.734451
Amy1	1.59688	0.00537649	1.27421	0.0154547	1.20076	0.625968	1.11519	0.82927
Dnahc6	1.12936	0.316335	1.267	0.130543	1.01391	0.99748	1.57927	0.0440799
Usp36	1.64156	0.000933927	1.2602	0.000933469	1.37315	0.386174	1.23933	0.0943315
Ftsjd1	1.75094	0.00651522	1.24567	0.00102814	1.43616	0.715632	-1.06876	0.763216
Npc1l1	1.60281	0.00419793	1.21477	0.0129871	1.13461	0.886924	1.03651	0.890351
Ly6g	1.50487	0.00397398	1.20278	0.0219286	1.13337	0.925475	-1.01227	0.893501
Mcm8	1.51116	0.000785279	1.19975	0.0111541	1.19614	0.562684	1.37425	0.0593334
Fgf16	1.52453	0.00194508	1.19645	0.00935627	1.11319	0.623891	1.07406	0.16337
Dleu7	1.34459	0.00951055	1.18021	0.019838	1.38658	0.310651	1.85457	0.00390214
4930467E23Rik	1.69842	0.00600994	1.16114	0.229474	-1.11562	0.99748	-1.12688	0.863004
1700003M02Rik	1.14264	0.0436558	1.15728	0.0570577	-1.05168	0.99748	1.58467	0.010846
Mthfd1l	1.60945	0.00195034	1.1497	0.0583266	1.63313	0.3071	1.43761	0.0240122
A930018M24Rik	1.72494	0.000614176	1.11357	0.0706455	2.27782	0.342894	2.24757	0.00362582
Ccdc11	1.51993	0.00374828	1.10357	0.0709255	1.11756	0.853477	1.06933	0.301377
Prnd	1.59445	0.000850281	1.09446	0.0937374	1.22679	0.58364	1.14924	0.359689
Crabp1	-1.01387	0.562973	1.08883	0.0589492	1.12565	0.809716	1.55395	0.0443845
A3galt2	1.76044	0.000785279	1.08196	0.187917	1.16099	0.94275	1.05655	0.735207
Cry1	1.60408	0.000614176	1.06246	0.0951575	1.36121	0.682387	1.09898	0.427298
Rad54l	1.54029	0.00374828	1.05454	0.308083	1.12615	0.954007	1.0441	0.868948
Ttc18	1.04638	0.380305	1.01598	0.357648	-1.02182	0.99748	1.52522	0.0256275
Trem3	1.04736	0.0699481	-1.00658	0.411603	1.16352	0.67665	1.51764	0.0113442
Thbs4	-1.01157	0.445764	-1.05048	0.162421	1.41731	0.539157	1.66505	0.0364217
Tm6sf2	1.51378	0.00112268	-1.05723	0.359196	1.28029	0.502342	1.12831	0.700011
Per2	1.56497	0.000614176	-1.06582	0.268526	1.05798	0.975632	-1.00866	0.905269
Gm10694	1.5373	0.00202713	-1.12182	0.209827	1.20279	0.893444	1.06565	0.879696
