# Supplementary material for: Activation of GCN2 kinase by ribosome stalling links translation elongation with translation initiation
Source: eLife. 2016 Apr 16;5:e14295. doi: 10.7554/eLife.14295 (PMC4917338; doi:10.7554/eLife.14295)
Supplement: Figure 1—source data 2. — DOI: http://dx.doi.org/10.7554/eLife.14295.005 [file elife-14295-fig1-data2.xlsx]

## Sheet: 3W Cb up
Figure 1 -Source Data 2. G0 analysis of upregulated genes in the cerebellum of 3-week-old B6J-nmf205-/- mice. See Figure 1.
Enrichment Score	Category	Term	Count	PValue	Fold Enrichment	Benjamini	FDR
4.89	GOTERM_BP_FAT	GO:0043039~tRNA aminoacylation	11	9.6567e-11	20.4359	1.14335e-07	1.55856e-07
	GOTERM_BP_FAT	GO:0043038~amino acid activation	11	9.6567e-11	20.4359	1.14335e-07	1.55856e-07
	GOTERM_BP_FAT	GO:0006418~tRNA aminoacylation for protein translation	11	9.6567e-11	20.4359	1.14335e-07	1.55856e-07
	GOTERM_MF_FAT	GO:0004812~aminoacyl-tRNA ligase activity	11	1.46098e-10	19.6462	5.34718e-08	2.01142e-07
	GOTERM_MF_FAT	GO:0016875~ligase activity, forming carbon-oxygen bonds	11	1.46098e-10	19.6462	5.34718e-08	2.01142e-07
	GOTERM_MF_FAT	GO:0016876~ligase activity, forming aminoacyl-tRNA and related compounds	11	1.46098e-10	19.6462	5.34718e-08	2.01142e-07
	GOTERM_BP_FAT	GO:0006399~tRNA metabolic process	11	7.55487e-07	8.31903	0.000447148	0.00121932
	GOTERM_BP_FAT	GO:0006412~translation	15	2.12675e-05	4.01845	0.00627548	0.0343196
	GOTERM_BP_FAT	GO:0034660~ncRNA metabolic process	11	0.00012511	4.65371	0.0163252	0.201732
	GOTERM_MF_FAT	GO:0005524~ATP binding	28	0.00812412	1.66349	0.282319	10.623
	GOTERM_MF_FAT	GO:0032559~adenyl ribonucleotide binding	28	0.00943531	1.64412	0.293175	12.236
	GOTERM_MF_FAT	GO:0030554~adenyl nucleotide binding	28	0.0174672	1.56379	0.391108	21.542
	GOTERM_MF_FAT	GO:0001883~purine nucleoside binding	28	0.0192996	1.55065	0.399192	23.5328
	GOTERM_MF_FAT	GO:0001882~nucleoside binding	28	0.020811	1.5407	0.381881	25.1394
3.44	GOTERM_BP_FAT	GO:0008652~cellular amino acid biosynthetic process	7	1.1012e-05	13.5958	0.00433668	0.0177716
	GOTERM_BP_FAT	GO:0009309~amine biosynthetic process	8	2.15444e-05	9.36538	0.00508878	0.0347663
	GOTERM_BP_FAT	GO:0006563~L-serine metabolic process	4	5.21748e-05	48.8338	0.0102433	0.0841752
	GOTERM_BP_FAT	GO:0009070~serine family amino acid biosynthetic process	4	8.27668e-05	42.7296	0.0139025	0.133499
	GOTERM_BP_FAT	GO:0009069~serine family amino acid metabolic process	5	0.000109338	19.4225	0.0160527	0.176322
	GOTERM_BP_FAT	GO:0006564~L-serine biosynthetic process	3	0.000400001	85.4591	0.0421493	0.643638
	GOTERM_BP_FAT	GO:0046394~carboxylic acid biosynthetic process	7	0.00607867	4.24265	0.330391	9.37202
	GOTERM_BP_FAT	GO:0016053~organic acid biosynthetic process	7	0.00607867	4.24265	0.330391	9.37202
	GOTERM_BP_FAT	GO:0044271~nitrogen compound biosynthetic process	10	0.00881099	2.82977	0.342386	13.3104
	GOTERM_BP_FAT	GO:0009064~glutamine family amino acid metabolic process	4	0.0135495	7.94969	0.369659	19.7626
3.08	GOTERM_MF_FAT	GO:0000049~tRNA binding	4	0.00150569	17.1458	0.104434	2.05318
2.78	GOTERM_MF_FAT	GO:0046983~protein dimerization activity	16	9.54025e-06	4.03431	0.00174435	0.0131339
	GOTERM_MF_FAT	GO:0042802~identical protein binding	9	0.0197449	2.66056	0.385285	24.0094
	GOTERM_MF_FAT	GO:0042803~protein homodimerization activity	7	0.0248827	3.10934	0.418699	29.3131
2.67	GOTERM_MF_FAT	GO:0015171~amino acid transmembrane transporter activity	7	2.29275e-05	12.0021	0.00279328	0.0315612
	GOTERM_MF_FAT	GO:0005275~amine transmembrane transporter activity	7	8.66142e-05	9.52545	0.00789422	0.119181
	GOTERM_MF_FAT	GO:0015179~L-amino acid transmembrane transporter activity	4	0.00447207	11.8247	0.208915	5.98426
	GOTERM_BP_FAT	GO:0046942~carboxylic acid transport	6	0.00593731	5.17934	0.339494	9.16376
	GOTERM_BP_FAT	GO:0015849~organic acid transport	6	0.00619244	5.12755	0.320968	9.53931
	GOTERM_BP_FAT	GO:0006865~amino acid transport	5	0.00935321	6.01825	0.337733	14.0727
	GOTERM_BP_FAT	GO:0015837~amine transport	5	0.0223301	4.64452	0.414197	30.5447
	GOTERM_BP_FAT	GO:0055085~transmembrane transport	11	0.0424147	2.04359	0.540448	50.3167
2.55	GOTERM_BP_FAT	GO:0007155~cell adhesion	17	0.000833244	2.58967	0.0789562	1.33638
	GOTERM_BP_FAT	GO:0022610~biological adhesion	17	0.000849123	2.58506	0.0744512	1.36168
	GOTERM_BP_FAT	GO:0016337~cell-cell adhesion	9	0.00636808	3.25903	0.314904	9.79699
2.21	GOTERM_BP_FAT	GO:0009069~serine family amino acid metabolic process	5	0.000109338	19.4225	0.0160527	0.176322
	GOTERM_MF_FAT	GO:0030170~pyridoxal phosphate binding	5	0.00349928	7.93787	0.192515	4.71153
	GOTERM_MF_FAT	GO:0070279~vitamin B6 binding	5	0.00349928	7.93787	0.192515	4.71153
	GOTERM_MF_FAT	GO:0019842~vitamin binding	6	0.0132944	4.25103	0.335153	16.8281
	GOTERM_MF_FAT	GO:0008483~transaminase activity	3	0.0311737	10.7161	0.456684	35.3396
1.86	GOTERM_BP_FAT	GO:0051789~response to protein stimulus	6	0.00342682	5.89373	0.237349	5.3896
	GOTERM_BP_FAT	GO:0009719~response to endogenous stimulus	7	0.0205768	3.25116	0.407716	28.5068
	GOTERM_BP_FAT	GO:0014075~response to amine stimulus	3	0.0222552	12.8189	0.41948	30.4586
	GOTERM_BP_FAT	GO:0010243~response to organic nitrogen	3	0.0222552	12.8189	0.41948	30.4586
1.78	GOTERM_CC_FAT	GO:0005576~extracellular region	28	0.0406881	1.44722	0.88144	39.2439
1.77	GOTERM_BP_FAT	GO:0006979~response to oxidative stress	6	0.00342682	5.89373	0.237349	5.3896
	GOTERM_BP_FAT	GO:0010035~response to inorganic substance	5	0.0223301	4.64452	0.414197	30.5447
1.72	GOTERM_MF_FAT	GO:0046983~protein dimerization activity	16	9.54025e-06	4.03431	0.00174435	0.0131339
	GOTERM_MF_FAT	GO:0043565~sequence-specific DNA binding	15	0.00521934	2.31283	0.212908	6.95122
	GOTERM_BP_FAT	GO:0010557~positive regulation of macromolecule biosynthetic process	14	0.00894445	2.25741	0.335785	13.4986
	GOTERM_BP_FAT	GO:0031328~positive regulation of cellular biosynthetic process	14	0.0122742	2.16744	0.366791	18.0718
	GOTERM_BP_FAT	GO:0009891~positive regulation of biosynthetic process	14	0.0131503	2.14799	0.369334	19.2369
	GOTERM_MF_FAT	GO:0046982~protein heterodimerization activity	6	0.0132944	4.25103	0.335153	16.8281
	GOTERM_BP_FAT	GO:0045935~positive regulation of nucleobase, nucleoside, nucleotide and nucleic acid metabolic process	13	0.0159831	2.17837	0.379308	22.8983
	GOTERM_BP_FAT	GO:0051173~positive regulation of nitrogen compound metabolic process	13	0.0198542	2.11211	0.403199	27.6507
	GOTERM_BP_FAT	GO:0045941~positive regulation of transcription	12	0.0229343	2.15897	0.416457	31.2342
	GOTERM_BP_FAT	GO:0010628~positive regulation of gene expression	12	0.0272599	2.10145	0.442533	35.9863
	GOTERM_MF_FAT	GO:0016563~transcription activator activity	8	0.0312529	2.648	0.440692	35.4123
	GOTERM_BP_FAT	GO:0010604~positive regulation of macromolecule metabolic process	14	0.0332679	1.89009	0.481445	42.0777
1.69	GOTERM_BP_FAT	GO:0006760~folic acid and derivative metabolic process	3	0.00963453	19.7213	0.335937	14.4656
	GOTERM_BP_FAT	GO:0006730~one-carbon metabolic process	6	0.0117864	4.38252	0.36418	17.4164
	GOTERM_BP_FAT	GO:0051186~cofactor metabolic process	7	0.0196326	3.28689	0.413481	27.3862
	GOTERM_BP_FAT	GO:0006732~coenzyme metabolic process	6	0.0257539	3.5857	0.435648	34.3679
1.65	GOTERM_BP_FAT	GO:0009991~response to extracellular stimulus	7	0.00458672	4.49785	0.288371	7.15126
	GOTERM_BP_FAT	GO:0009719~response to endogenous stimulus	7	0.0205768	3.25116	0.407716	28.5068
	GOTERM_BP_FAT	GO:0031667~response to nutrient levels	5	0.045146	3.71561	0.557969	52.5552
1.35	GOTERM_MF_FAT	GO:0016563~transcription activator activity	8	0.0312529	2.648	0.440692	35.4123
1.35	GOTERM_BP_FAT	GO:0043066~negative regulation of apoptosis	9	0.00685431	3.21813	0.309374	10.5068
	GOTERM_BP_FAT	GO:0043069~negative regulation of programmed cell death	9	0.00772657	3.15218	0.329207	11.7669
	GOTERM_BP_FAT	GO:0060548~negative regulation of cell death	9	0.00791062	3.13931	0.324167	12.0307
	GOTERM_BP_FAT	GO:0042127~regulation of cell proliferation	14	0.0100607	2.22384	0.338229	15.0578
	GOTERM_BP_FAT	GO:0042981~regulation of apoptosis	14	0.0124457	2.16352	0.361949	18.3011
	GOTERM_BP_FAT	GO:0043067~regulation of programmed cell death	14	0.0136988	2.13648	0.364696	19.9583
	GOTERM_BP_FAT	GO:0010941~regulation of cell death	14	0.0142647	2.12509	0.368564	20.6963
	GOTERM_BP_FAT	GO:0033554~cellular response to stress	11	0.0196931	2.32686	0.407448	27.4585
	GOTERM_BP_FAT	GO:0008630~DNA damage response, signal transduction resulting in induction of apoptosis	3	0.0289709	11.1468	0.440179	37.7797
	GOTERM_BP_FAT	GO:0008285~negative regulation of cell proliferation	7	0.0468903	2.6706	0.566648	53.9348
1.18	GOTERM_BP_FAT	GO:0002526~acute inflammatory response	5	0.0146546	5.27525	0.368707	21.2011
	GOTERM_BP_FAT	GO:0006954~inflammatory response	8	0.0161674	3.03855	0.375434	23.1311
	GOTERM_BP_FAT	GO:0006952~defense response	11	0.0364861	2.09833	0.497226	45.1125
	GOTERM_BP_FAT	GO:0009611~response to wounding	9	0.0498634	2.21652	0.579015	56.2
1.15	GOTERM_BP_FAT	GO:0044092~negative regulation of molecular function	9	0.000152307	5.82676	0.0178728	0.245535
	GOTERM_BP_FAT	GO:0043086~negative regulation of catalytic activity	6	0.00645519	5.07678	0.305893	9.92454
	GOTERM_BP_FAT	GO:0006469~negative regulation of protein kinase activity	4	0.0213801	6.70268	0.413214	29.4473
	GOTERM_BP_FAT	GO:0033673~negative regulation of kinase activity	4	0.0213801	6.70268	0.413214	29.4473
	GOTERM_BP_FAT	GO:0051348~negative regulation of transferase activity	4	0.0236514	6.44974	0.420155	32.0442
1.13	GOTERM_BP_FAT	GO:0042127~regulation of cell proliferation	14	0.0100607	2.22384	0.338229	15.0578
	GOTERM_BP_FAT	GO:0007169~transmembrane receptor protein tyrosine kinase signaling pathway	7	0.0246955	3.1157	0.428	33.2077
	GOTERM_BP_FAT	GO:0007167~enzyme linked receptor protein signaling pathway	8	0.0404221	2.5043	0.528388	48.6216
1.03	GOTERM_BP_FAT	GO:0009719~response to endogenous stimulus	7	0.0205768	3.25116	0.407716	28.5068
1.02	GOTERM_BP_FAT	GO:0043433~negative regulation of transcription factor activity	3	0.026652	11.6535	0.440957	35.3376
	GOTERM_BP_FAT	GO:0043392~negative regulation of DNA binding	3	0.0363847	9.86067	0.501699	45.0192
	GOTERM_BP_FAT	GO:0051100~negative regulation of binding	3	0.0472599	8.54591	0.564274	54.2223
0.9	GOTERM_BP_FAT	GO:0048010~vascular endothelial growth factor receptor signaling pathway	3	0.0111551	18.3127	0.357719	16.5608
	GOTERM_BP_FAT	GO:0001525~angiogenesis	6	0.0195293	3.8553	0.41903	27.2626
	GOTERM_BP_FAT	GO:0048514~blood vessel morphogenesis	7	0.0281954	3.02128	0.44225	36.9727
0.79	GOTERM_MF_FAT	GO:0005539~glycosaminoglycan binding	5	0.0434991	3.76005	0.522828	45.7895

## Sheet: 5W Cb up
Figure 1 -Source Data 2. G0 analysis of upregulated genes in the cerebellum of 5-week-old B6J-nmf205-/- mice. See Figure 1.
Enrichment Score	Category	Term	Count	PValue	Fold Enrichment	Benjamini	FDR
11.01	GOTERM_CC_FAT	GO:0005576~extracellular region	91	1.05807e-06	1.64793	7.30041e-05	0.0013959
	GOTERM_CC_FAT	GO:0005615~extracellular space	39	2.03549e-06	2.32194	0.000112353	0.00268539
	GOTERM_CC_FAT	GO:0044421~extracellular region part	50	6.62505e-06	1.96533	0.000228539	0.00874008
10.46	GOTERM_CC_FAT	GO:0005886~plasma membrane	143	7.07269e-08	1.49709	6.50686e-06	9.331e-05
	GOTERM_CC_FAT	GO:0031224~intrinsic to membrane	215	0.0245172	1.10602	0.267588	27.9267
	GOTERM_CC_FAT	GO:0016021~integral to membrane	208	0.0259819	1.10844	0.270871	29.3414
9.17	GOTERM_BP_FAT	GO:0006955~immune response	51	2.26295e-14	3.46191	5.17746e-11	3.95461e-11
	GOTERM_BP_FAT	GO:0006952~defense response	40	6.72866e-09	2.85462	1.92271e-06	1.17492e-05
	GOTERM_BP_FAT	GO:0045087~innate immune response	16	1.10452e-06	4.78082	0.000114763	0.00192864
8.43	GOTERM_BP_FAT	GO:0009611~response to wounding	36	8.91829e-10	3.31696	4.07744e-07	1.55727e-06
	GOTERM_BP_FAT	GO:0006952~defense response	40	6.72866e-09	2.85462	1.92271e-06	1.17492e-05
	GOTERM_BP_FAT	GO:0006954~inflammatory response	27	8.61934e-09	3.83661	2.18931e-06	1.50506e-05
5.98	GOTERM_BP_FAT	GO:0002684~positive regulation of immune system process	28	2.62745e-10	4.34568	2.00211e-07	4.58791e-07
	GOTERM_BP_FAT	GO:0048002~antigen processing and presentation of peptide antigen	12	5.09738e-09	10.9617	1.9421e-06	8.90077e-06
	GOTERM_BP_FAT	GO:0002250~adaptive immune response	15	2.89766e-07	5.70924	3.67997e-05	0.000505974
	GOTERM_BP_FAT	GO:0002460~adaptive immune response based on somatic recombination of immune receptors built from immunoglobulin superfamily domains	15	2.89766e-07	5.70924	3.67997e-05	0.000505974
	GOTERM_BP_FAT	GO:0002449~lymphocyte mediated immunity	14	5.65545e-07	5.88954	6.46397e-05	0.000987521
	GOTERM_BP_FAT	GO:0050778~positive regulation of immune response	18	1.11894e-06	4.23156	0.000111206	0.00195381
	GOTERM_BP_FAT	GO:0048584~positive regulation of response to stimulus	21	1.45907e-06	3.60972	0.000128277	0.00254771
	GOTERM_BP_FAT	GO:0016064~immunoglobulin mediated immune response	12	3.42347e-06	6.08986	0.000289812	0.00597771
	GOTERM_BP_FAT	GO:0002443~leukocyte mediated immunity	14	3.60312e-06	5.02927	0.000294126	0.00629139
	GOTERM_BP_FAT	GO:0019724~B cell mediated immunity	12	4.70467e-06	5.90248	0.00037079	0.00821473
	GOTERM_BP_FAT	GO:0002252~immune effector process	16	8.77657e-06	4.05991	0.000626782	0.0153241
	GOTERM_BP_FAT	GO:0019882~antigen processing and presentation	12	7.95367e-05	4.4099	0.00477352	0.138792
5.86	GOTERM_BP_FAT	GO:0007155~cell adhesion	43	1.3201e-07	2.4506	2.15551e-05	0.000230509
	GOTERM_BP_FAT	GO:0022610~biological adhesion	43	1.36066e-07	2.44624	2.07362e-05	0.000237591
	GOTERM_BP_FAT	GO:0016337~cell-cell adhesion	20	0.000155115	2.70947	0.00840779	0.270508
4.59	GOTERM_BP_FAT	GO:0006935~chemotaxis	16	1.40499e-06	4.6931	0.000128464	0.00245329
	GOTERM_BP_FAT	GO:0042330~taxis	16	1.40499e-06	4.6931	0.000128464	0.00245329
	GOTERM_BP_FAT	GO:0007626~locomotory behavior	23	5.89529e-06	3.07678	0.000449122	0.0102936
	GOTERM_BP_FAT	GO:0007610~behavior	27	0.000420284	2.13145	0.0167178	0.731345
4.52	GOTERM_CC_FAT	GO:0005764~lysosome	20	6.00099e-06	3.41835	0.000276008	0.00791682
	GOTERM_CC_FAT	GO:0000323~lytic vacuole	20	6.5146e-06	3.39926	0.000256829	0.00859437
	GOTERM_CC_FAT	GO:0005773~vacuole	21	1.23419e-05	3.13182	0.000378417	0.0162815
4.06	GOTERM_BP_FAT	GO:0043039~tRNA aminoacylation	11	1.17302e-06	7.64542	0.000111724	0.00204824
	GOTERM_BP_FAT	GO:0043038~amino acid activation	11	1.17302e-06	7.64542	0.000111724	0.00204824
	GOTERM_BP_FAT	GO:0006418~tRNA aminoacylation for protein translation	11	1.17302e-06	7.64542	0.000111724	0.00204824
	GOTERM_MF_FAT	GO:0004812~aminoacyl-tRNA ligase activity	11	1.43694e-06	7.50041	0.000953674	0.00215166
	GOTERM_MF_FAT	GO:0016876~ligase activity, forming aminoacyl-tRNA and related compounds	11	1.43694e-06	7.50041	0.000953674	0.00215166
	GOTERM_MF_FAT	GO:0016875~ligase activity, forming carbon-oxygen bonds	11	1.43694e-06	7.50041	0.000953674	0.00215166
	GOTERM_BP_FAT	GO:0006399~tRNA metabolic process	13	0.00020896	3.67817	0.010113	0.364249
	GOTERM_BP_FAT	GO:0034660~ncRNA metabolic process	15	0.00445688	2.37414	0.0980025	7.50335
	GOTERM_MF_FAT	GO:0000049~tRNA binding	4	0.021796	6.54581	0.407019	28.1064
	GOTERM_BP_FAT	GO:0006412~translation	18	0.0226231	1.80405	0.286438	32.9392
3.81	GOTERM_MF_FAT	GO:0030247~polysaccharide binding	16	8.01701e-06	4.09113	0.00265812	0.012004
	GOTERM_MF_FAT	GO:0001871~pattern binding	16	8.01701e-06	4.09113	0.00265812	0.012004
	GOTERM_MF_FAT	GO:0005539~glycosaminoglycan binding	15	9.30886e-06	4.30646	0.00205825	0.0139382
	GOTERM_MF_FAT	GO:0030246~carbohydrate binding	25	4.01095e-05	2.58116	0.00663619	0.0600431
	GOTERM_MF_FAT	GO:0008201~heparin binding	11	0.00020681	4.33759	0.0226293	0.30923
3.77	GOTERM_BP_FAT	GO:0050900~leukocyte migration	12	5.60962e-08	8.92235	1.16578e-05	9.79523e-05
	GOTERM_BP_FAT	GO:0030593~neutrophil chemotaxis	6	0.000131055	11.2842	0.00746233	0.228596
	GOTERM_BP_FAT	GO:0030595~leukocyte chemotaxis	7	0.000151038	8.28898	0.00838654	0.263407
	GOTERM_BP_FAT	GO:0060326~cell chemotaxis	7	0.000151038	8.28898	0.00838654	0.263407
	GOTERM_BP_FAT	GO:0016477~cell migration	20	0.000192781	2.66431	0.00953554	0.33609
	GOTERM_BP_FAT	GO:0045123~cellular extravasation	4	0.000562452	21.3145	0.0212074	0.977591
	GOTERM_BP_FAT	GO:0051674~localization of cell	20	0.00151404	2.25153	0.0451327	2.61105
	GOTERM_BP_FAT	GO:0048870~cell motility	20	0.00151404	2.25153	0.0451327	2.61105
	GOTERM_BP_FAT	GO:0006928~cell motion	23	0.00269114	2.00368	0.0732323	4.59647
3.76	GOTERM_CC_FAT	GO:0031226~intrinsic to plasma membrane	37	6.49135e-05	2.03925	0.00179007	0.0856065
	GOTERM_CC_FAT	GO:0005887~integral to plasma membrane	35	0.000147693	2.00531	0.00369917	0.194676
	GOTERM_CC_FAT	GO:0044459~plasma membrane part	78	0.000547721	1.45317	0.012522	0.7202
3.46	GOTERM_BP_FAT	GO:0001775~cell activation	31	1.58947e-10	4.02896	1.81676e-07	2.77544e-07
	GOTERM_BP_FAT	GO:0045321~leukocyte activation	26	2.14476e-08	3.79573	4.9029e-06	3.74506e-05
	GOTERM_BP_FAT	GO:0046649~lymphocyte activation	18	0.000102084	3.01305	0.00596614	0.178104
	GOTERM_BP_FAT	GO:0042110~T cell activation	13	0.000267412	3.58304	0.0126564	0.465914
	GOTERM_BP_FAT	GO:0002521~leukocyte differentiation	12	0.00492339	2.70184	0.105696	8.25728
	GOTERM_BP_FAT	GO:0030098~lymphocyte differentiation	10	0.00932896	2.80454	0.162283	15.0971
	GOTERM_BP_FAT	GO:0030097~hemopoiesis	16	0.0124582	2.03804	0.199212	19.6603
	GOTERM_BP_FAT	GO:0048534~hemopoietic or lymphoid organ development	17	0.0153066	1.93423	0.226928	23.6119
	GOTERM_BP_FAT	GO:0033077~T cell differentiation in the thymus	5	0.0168458	4.99559	0.240764	25.6702
	GOTERM_BP_FAT	GO:0002520~immune system development	17	0.0230187	1.84244	0.287576	33.4115
	GOTERM_BP_FAT	GO:0030217~T cell differentiation	7	0.0311597	2.94477	0.34183	42.4636
3.12	GOTERM_BP_FAT	GO:0008652~cellular amino acid biosynthetic process	8	0.000386836	5.81305	0.0165498	0.673327
	GOTERM_BP_FAT	GO:0009309~amine biosynthetic process	10	0.000426548	4.37969	0.0166749	0.742206
	GOTERM_BP_FAT	GO:0006563~L-serine metabolic process	4	0.000961519	18.2696	0.0313684	1.66573
	GOTERM_BP_FAT	GO:0009070~serine family amino acid biosynthetic process	4	0.00150289	15.9859	0.0460067	2.59206
	GOTERM_BP_FAT	GO:0006564~L-serine biosynthetic process	3	0.00285404	31.9718	0.0739868	4.86822
	GOTERM_BP_FAT	GO:0009069~serine family amino acid metabolic process	5	0.00437547	7.26631	0.0981825	7.37118
3.01	GOTERM_BP_FAT	GO:0046649~lymphocyte activation	18	0.000102084	3.01305	0.00596614	0.178104
	GOTERM_BP_FAT	GO:0042098~T cell proliferation	7	0.000187215	7.99294	0.00946635	0.326403
	GOTERM_BP_FAT	GO:0042110~T cell activation	13	0.000267412	3.58304	0.0126564	0.465914
	GOTERM_BP_FAT	GO:0032943~mononuclear cell proliferation	8	0.000334137	5.94824	0.0145843	0.581851
	GOTERM_BP_FAT	GO:0070661~leukocyte proliferation	8	0.000334137	5.94824	0.0145843	0.581851
	GOTERM_BP_FAT	GO:0046651~lymphocyte proliferation	7	0.00180353	5.32863	0.0515298	3.10291
	GOTERM_BP_FAT	GO:0050798~activated T cell proliferation	3	0.0183843	13.7022	0.253631	27.6753
	GOTERM_BP_FAT	GO:0008283~cell proliferation	14	0.0464561	1.81216	0.421001	56.4229
2.63	GOTERM_BP_FAT	GO:0006909~phagocytosis	8	0.000758456	5.21988	0.0267374	1.31614
	GOTERM_BP_FAT	GO:0006897~endocytosis	16	0.000821887	2.721	0.0285029	1.42547
	GOTERM_BP_FAT	GO:0010324~membrane invagination	16	0.000821887	2.721	0.0285029	1.42547
	GOTERM_BP_FAT	GO:0016044~membrane organization	20	0.000912365	2.35087	0.0311209	1.58122
2.45	GOTERM_BP_FAT	GO:0008652~cellular amino acid biosynthetic process	8	0.000386836	5.81305	0.0165498	0.673327
	GOTERM_BP_FAT	GO:0009309~amine biosynthetic process	10	0.000426548	4.37969	0.0166749	0.742206
	GOTERM_BP_FAT	GO:0046394~carboxylic acid biosynthetic process	12	0.00466884	2.721	0.101456	7.84662
	GOTERM_BP_FAT	GO:0016053~organic acid biosynthetic process	12	0.00466884	2.721	0.101456	7.84662
	GOTERM_BP_FAT	GO:0009064~glutamine family amino acid metabolic process	5	0.0443355	3.71765	0.410753	54.6994
2.43	GOTERM_BP_FAT	GO:0002478~antigen processing and presentation of exogenous peptide antigen	11	6.26637e-10	15.2908	3.58123e-07	1.0942e-06
	GOTERM_BP_FAT	GO:0048002~antigen processing and presentation of peptide antigen	12	5.09738e-09	10.9617	1.9421e-06	8.90077e-06
	GOTERM_BP_FAT	GO:0019884~antigen processing and presentation of exogenous antigen	11	6.24779e-09	12.5603	2.04035e-06	1.09096e-05
	GOTERM_BP_FAT	GO:0002495~antigen processing and presentation of peptide antigen via MHC class II	8	2.45846e-07	15.9859	3.30586e-05	0.000429283
	GOTERM_BP_FAT	GO:0019886~antigen processing and presentation of exogenous peptide antigen via MHC class II	8	2.45846e-07	15.9859	3.30586e-05	0.000429283
	GOTERM_BP_FAT	GO:0002504~antigen processing and presentation of peptide or polysaccharide antigen via MHC class II	8	9.98205e-07	13.4618	0.000108656	0.001743
	GOTERM_BP_FAT	GO:0019882~antigen processing and presentation	12	7.95367e-05	4.4099	0.00477352	0.138792
	GOTERM_CC_FAT	GO:0005771~multivesicular body	3	0.033146	10.1411	0.321343	35.8988
	GOTERM_CC_FAT	GO:0042613~MHC class II protein complex	3	0.0405485	9.12701	0.36681	42.0798
2.41	GOTERM_BP_FAT	GO:0045621~positive regulation of lymphocyte differentiation	8	7.10524e-05	7.52277	0.00438042	0.123995
	GOTERM_BP_FAT	GO:0045582~positive regulation of T cell differentiation	7	0.000405202	6.99382	0.0170107	0.705187
	GOTERM_BP_FAT	GO:0045059~positive thymic T cell selection	4	0.00150289	15.9859	0.0460067	2.59206
	GOTERM_BP_FAT	GO:0043368~positive T cell selection	4	0.00307377	12.7887	0.076857	5.23359
	GOTERM_BP_FAT	GO:0045580~regulation of T cell differentiation	7	0.00360638	4.66255	0.0876828	6.11377
	GOTERM_BP_FAT	GO:0050870~positive regulation of T cell activation	8	0.00437213	3.87537	0.0990806	7.36574
	GOTERM_BP_FAT	GO:0030098~lymphocyte differentiation	10	0.00932896	2.80454	0.162283	15.0971
	GOTERM_BP_FAT	GO:0045061~thymic T cell selection	4	0.0103792	8.5258	0.173707	16.6551
	GOTERM_BP_FAT	GO:0033077~T cell differentiation in the thymus	5	0.0168458	4.99559	0.240764	25.6702
	GOTERM_BP_FAT	GO:0045058~T cell selection	4	0.0264332	6.08986	0.308513	37.3604
	GOTERM_BP_FAT	GO:0030217~T cell differentiation	7	0.0311597	2.94477	0.34183	42.4636
2.34	GOTERM_MF_FAT	GO:0015171~amino acid transmembrane transporter activity	9	0.000121425	5.89123	0.0159968	0.181667
	GOTERM_BP_FAT	GO:0015809~arginine transport	4	0.000287897	25.5774	0.0130783	0.501521
	GOTERM_BP_FAT	GO:0015802~basic amino acid transport	4	0.000562452	21.3145	0.0212074	0.977591
	GOTERM_MF_FAT	GO:0005275~amine transmembrane transporter activity	9	0.000620493	4.67558	0.0571768	0.92511
	GOTERM_MF_FAT	GO:0015179~L-amino acid transmembrane transporter activity	6	0.00166515	6.77153	0.104755	2.4646
	GOTERM_MF_FAT	GO:0015181~arginine transmembrane transporter activity	3	0.00272395	32.7291	0.151811	4.00212
	GOTERM_MF_FAT	GO:0015174~basic amino acid transmembrane transporter activity	3	0.00533801	24.5468	0.188649	7.7018
	GOTERM_BP_FAT	GO:0006865~amino acid transport	7	0.0232034	3.15215	0.286473	33.631
	GOTERM_BP_FAT	GO:0015837~amine transport	8	0.0248075	2.78015	0.296932	35.5087
	GOTERM_BP_FAT	GO:0046942~carboxylic acid transport	8	0.0351272	2.58358	0.365006	46.442
	GOTERM_BP_FAT	GO:0015849~organic acid transport	8	0.0368022	2.55774	0.373996	48.0425
2.29	GOTERM_BP_FAT	GO:0002274~myeloid leukocyte activation	11	7.18433e-08	10.0483	1.36861e-05	0.000125449
	GOTERM_BP_FAT	GO:0002819~regulation of adaptive immune response	9	0.000321313	5.13832	0.0143014	0.559579
	GOTERM_BP_FAT	GO:0002822~regulation of adaptive immune response based on somatic recombination of immune receptors built from immunoglobulin superfamily domains	9	0.000321313	5.13832	0.0143014	0.559579
	GOTERM_BP_FAT	GO:0006909~phagocytosis	8	0.000758456	5.21988	0.0267374	1.31614
	GOTERM_BP_FAT	GO:0050764~regulation of phagocytosis	6	0.00091578	7.67322	0.0307766	1.58709
	GOTERM_BP_FAT	GO:0006911~phagocytosis, engulfment	5	0.000970435	10.6573	0.0312096	1.68106
	GOTERM_BP_FAT	GO:0045576~mast cell activation	5	0.000970435	10.6573	0.0312096	1.68106
	GOTERM_BP_FAT	GO:0051130~positive regulation of cellular component organization	12	0.00150584	3.14476	0.0454862	2.59708
	GOTERM_BP_FAT	GO:0051050~positive regulation of transport	12	0.0028167	2.90652	0.0738902	4.80598
	GOTERM_BP_FAT	GO:0045807~positive regulation of endocytosis	6	0.00381014	5.64208	0.0895666	6.44846
	GOTERM_BP_FAT	GO:0050766~positive regulation of phagocytosis	5	0.00516808	6.95038	0.109637	8.65041
	GOTERM_BP_FAT	GO:0030100~regulation of endocytosis	7	0.00539066	4.30389	0.110032	9.00664
	GOTERM_MF_FAT	GO:0019864~IgG binding	3	0.00871768	19.6374	0.241834	12.288
	GOTERM_BP_FAT	GO:0060627~regulation of vesicle-mediated transport	8	0.0148822	3.08162	0.22423	23.0349
	GOTERM_BP_FAT	GO:0032101~regulation of response to external stimulus	9	0.0151855	2.79365	0.226793	23.4477
	GOTERM_BP_FAT	GO:0002673~regulation of acute inflammatory response	4	0.0173715	7.10484	0.244323	26.3612
	GOTERM_BP_FAT	GO:0002861~regulation of inflammatory response to antigenic stimulus	4	0.0173715	7.10484	0.244323	26.3612
	GOTERM_BP_FAT	GO:0001810~regulation of type I hypersensitivity	3	0.0240114	11.9894	0.291845	34.5832
	GOTERM_BP_FAT	GO:0050727~regulation of inflammatory response	6	0.0320997	3.36545	0.345425	43.4306
	GOTERM_MF_FAT	GO:0019865~immunoglobulin binding	3	0.0424898	8.92611	0.541224	47.8036
2.28	GOTERM_BP_FAT	GO:0002697~regulation of immune effector process	15	5.24116e-07	5.44973	6.30574e-05	0.00091518
	GOTERM_BP_FAT	GO:0002703~regulation of leukocyte mediated immunity	11	5.85166e-05	5.02413	0.00370902	0.10213
	GOTERM_BP_FAT	GO:0002706~regulation of lymphocyte mediated immunity	10	0.000174947	4.91873	0.0090489	0.305044
	GOTERM_BP_FAT	GO:0002819~regulation of adaptive immune response	9	0.000321313	5.13832	0.0143014	0.559579
	GOTERM_BP_FAT	GO:0002822~regulation of adaptive immune response based on somatic recombination of immune receptors built from immunoglobulin superfamily domains	9	0.000321313	5.13832	0.0143014	0.559579
	GOTERM_BP_FAT	GO:0002699~positive regulation of immune effector process	8	0.000512116	5.56031	0.0196517	0.89047
	GOTERM_BP_FAT	GO:0002821~positive regulation of adaptive immune response	7	0.000570504	6.58242	0.0211589	0.99152
	GOTERM_BP_FAT	GO:0002824~positive regulation of adaptive immune response based on somatic recombination of immune receptors built from immunoglobulin superfamily domains	7	0.000570504	6.58242	0.0211589	0.99152
	GOTERM_BP_FAT	GO:0002708~positive regulation of lymphocyte mediated immunity	7	0.00139069	5.59506	0.0432233	2.40076
	GOTERM_BP_FAT	GO:0002705~positive regulation of leukocyte mediated immunity	7	0.00139069	5.59506	0.0432233	2.40076
	GOTERM_BP_FAT	GO:0002711~positive regulation of T cell mediated immunity	4	0.00683286	9.83747	0.130592	11.2832
	GOTERM_BP_FAT	GO:0042590~antigen processing and presentation of exogenous peptide antigen via MHC class I	3	0.00912506	19.1831	0.162715	14.7915
	GOTERM_BP_FAT	GO:0001910~regulation of leukocyte mediated cytotoxicity	5	0.0134781	5.32863	0.209432	21.0968
	GOTERM_BP_FAT	GO:0031341~regulation of cell killing	5	0.0134781	5.32863	0.209432	21.0968
	GOTERM_BP_FAT	GO:0002474~antigen processing and presentation of peptide antigen via MHC class I	4	0.0148129	7.52277	0.224769	22.9403
	GOTERM_BP_FAT	GO:0002709~regulation of T cell mediated immunity	4	0.0173715	7.10484	0.244323	26.3612
	GOTERM_BP_FAT	GO:0002861~regulation of inflammatory response to antigenic stimulus	4	0.0173715	7.10484	0.244323	26.3612
	GOTERM_BP_FAT	GO:0001916~positive regulation of T cell mediated cytotoxicity	3	0.0302426	10.6573	0.336705	41.5051
	GOTERM_BP_FAT	GO:0050727~regulation of inflammatory response	6	0.0320997	3.36545	0.345425	43.4306
	GOTERM_BP_FAT	GO:0031349~positive regulation of defense response	6	0.0320997	3.36545	0.345425	43.4306
	GOTERM_BP_FAT	GO:0001912~positive regulation of leukocyte mediated cytotoxicity	4	0.0336282	5.56031	0.357114	44.9704
	GOTERM_BP_FAT	GO:0031343~positive regulation of cell killing	4	0.0336282	5.56031	0.357114	44.9704
	GOTERM_BP_FAT	GO:0001914~regulation of T cell mediated cytotoxicity	3	0.0443472	8.71957	0.409253	54.709
2.24	GOTERM_CC_FAT	GO:0031410~cytoplasmic vesicle	30	0.00268995	1.79665	0.0555823	3.49123
	GOTERM_CC_FAT	GO:0031982~vesicle	30	0.00361275	1.75858	0.0688657	4.66272
	GOTERM_CC_FAT	GO:0016023~cytoplasmic membrane-bounded vesicle	23	0.0180065	1.69019	0.231989	21.3155
	GOTERM_CC_FAT	GO:0031988~membrane-bounded vesicle	23	0.0208577	1.66604	0.252395	24.2769
2.22	GOTERM_BP_FAT	GO:0007218~neuropeptide signaling pathway	9	0.00292471	3.68905	0.0749032	4.98588
2.18	GOTERM_BP_FAT	GO:0009991~response to extracellular stimulus	13	0.000927524	3.12506	0.0307141	1.60729
	GOTERM_BP_FAT	GO:0031667~response to nutrient levels	10	0.00985141	2.78015	0.166829	15.8756
	GOTERM_BP_FAT	GO:0007584~response to nutrient	7	0.0311597	2.94477	0.34183	42.4636
2.07	GOTERM_BP_FAT	GO:0050865~regulation of cell activation	18	7.47874e-06	3.68905	0.000551346	0.0130582
	GOTERM_BP_FAT	GO:0050867~positive regulation of cell activation	14	1.48971e-05	4.43173	0.00103144	0.0260094
	GOTERM_BP_FAT	GO:0002694~regulation of leukocyte activation	17	2.52198e-05	3.52935	0.00169424	0.0440283
	GOTERM_BP_FAT	GO:0002696~positive regulation of leukocyte activation	13	5.78782e-05	4.19831	0.00377325	0.101016
	GOTERM_BP_FAT	GO:0045621~positive regulation of lymphocyte differentiation	8	7.10524e-05	7.52277	0.00438042	0.123995
	GOTERM_BP_FAT	GO:0051251~positive regulation of lymphocyte activation	12	0.000161299	4.0815	0.00853915	0.281279
	GOTERM_BP_FAT	GO:0045582~positive regulation of T cell differentiation	7	0.000405202	6.99382	0.0170107	0.705187
	GOTERM_BP_FAT	GO:0045619~regulation of lymphocyte differentiation	9	0.000410649	4.96114	0.016627	0.714636
	GOTERM_BP_FAT	GO:0051249~regulation of lymphocyte activation	14	0.000572367	3.10837	0.0208885	0.994743
	GOTERM_BP_FAT	GO:0050864~regulation of B cell activation	8	0.00152641	4.65044	0.0449081	2.63211
	GOTERM_BP_FAT	GO:0045580~regulation of T cell differentiation	7	0.00360638	4.66255	0.0876828	6.11377
	GOTERM_BP_FAT	GO:0050870~positive regulation of T cell activation	8	0.00437213	3.87537	0.0990806	7.36574
	GOTERM_BP_FAT	GO:0050871~positive regulation of B cell activation	6	0.00553003	5.18461	0.111725	9.22902
	GOTERM_BP_FAT	GO:0050866~negative regulation of cell activation	7	0.0059227	4.22269	0.116135	9.85283
	GOTERM_BP_FAT	GO:0002695~negative regulation of leukocyte activation	7	0.0059227	4.22269	0.116135	9.85283
	GOTERM_BP_FAT	GO:0050863~regulation of T cell activation	10	0.00662117	2.96035	0.127867	10.9525
	GOTERM_BP_FAT	GO:0046635~positive regulation of alpha-beta T cell activation	5	0.00810675	6.14842	0.149393	13.2494
	GOTERM_BP_FAT	GO:0002683~negative regulation of immune system process	8	0.00942128	3.36545	0.16253	15.2352
	GOTERM_BP_FAT	GO:0045577~regulation of B cell differentiation	4	0.0124831	7.99294	0.198196	19.6955
	GOTERM_MF_FAT	GO:0042287~MHC protein binding	4	0.0163162	7.27313	0.353985	21.8339
	GOTERM_BP_FAT	GO:0030888~regulation of B cell proliferation	5	0.0168458	4.99559	0.240764	25.6702
	GOTERM_BP_FAT	GO:0051094~positive regulation of developmental process	14	0.0169819	2.09161	0.240984	25.8497
	GOTERM_BP_FAT	GO:0046638~positive regulation of alpha-beta T cell differentiation	4	0.0201607	6.7309	0.269906	29.9269
	GOTERM_BP_FAT	GO:0046634~regulation of alpha-beta T cell activation	5	0.0206961	4.70173	0.274473	30.5926
	GOTERM_BP_FAT	GO:0045597~positive regulation of cell differentiation	12	0.0214316	2.19235	0.279624	31.4973
	GOTERM_BP_FAT	GO:0051250~negative regulation of lymphocyte activation	6	0.0225785	3.68905	0.287518	32.8857
	GOTERM_BP_FAT	GO:0045579~positive regulation of B cell differentiation	3	0.0240114	11.9894	0.291845	34.5832
	GOTERM_BP_FAT	GO:0046637~regulation of alpha-beta T cell differentiation	4	0.029916	5.81305	0.335302	41.1602
	GOTERM_BP_FAT	GO:0030889~negative regulation of B cell proliferation	3	0.0370348	9.59153	0.374281	48.2612
	GOTERM_BP_FAT	GO:0050670~regulation of lymphocyte proliferation	7	0.0386715	2.79753	0.38413	49.7754
	GOTERM_BP_FAT	GO:0032944~regulation of mononuclear cell proliferation	7	0.0386715	2.79753	0.38413	49.7754
	GOTERM_BP_FAT	GO:0070663~regulation of leukocyte proliferation	7	0.0428241	2.7293	0.402942	53.432
	GOTERM_BP_FAT	GO:0050777~negative regulation of immune response	4	0.046118	4.91873	0.420229	56.1523
2.03	GOTERM_MF_FAT	GO:0030594~neurotransmitter receptor activity	10	0.00130466	3.76196	0.102693	1.93589
	GOTERM_MF_FAT	GO:0042165~neurotransmitter binding	10	0.00130466	3.76196	0.102693	1.93589
	GOTERM_BP_FAT	GO:0006821~chloride transport	8	0.00279699	4.19302	0.0742425	4.77312
	GOTERM_MF_FAT	GO:0022838~substrate specific channel activity	22	0.0034552	2.00011	0.174296	5.05076
	GOTERM_MF_FAT	GO:0022803~passive transmembrane transporter activity	22	0.00405234	1.97271	0.187307	5.89914
	GOTERM_MF_FAT	GO:0015267~channel activity	22	0.00405234	1.97271	0.187307	5.89914
	GOTERM_BP_FAT	GO:0015698~inorganic anion transport	9	0.00430088	3.46682	0.0985188	7.24993
	GOTERM_MF_FAT	GO:0031404~chloride ion binding	8	0.00454233	3.85048	0.194206	6.59001
	GOTERM_MF_FAT	GO:0005216~ion channel activity	21	0.00522994	1.96937	0.207149	7.55152
	GOTERM_MF_FAT	GO:0043168~anion binding	8	0.00533377	3.74046	0.19904	7.6959
	GOTERM_MF_FAT	GO:0016934~extracellular-glycine-gated chloride channel activity	3	0.00533801	24.5468	0.188649	7.7018
	GOTERM_MF_FAT	GO:0016933~extracellular-glycine-gated ion channel activity	3	0.00533801	24.5468	0.188649	7.7018
	GOTERM_CC_FAT	GO:0034707~chloride channel complex	7	0.00562201	4.25927	0.0985375	7.16816
	GOTERM_MF_FAT	GO:0022836~gated channel activity	18	0.00572721	2.09652	0.190936	8.24111
	GOTERM_MF_FAT	GO:0008509~anion transmembrane transporter activity	11	0.00641715	2.76938	0.201472	9.18994
	GOTERM_BP_FAT	GO:0006820~anion transport	11	0.00753058	2.7053	0.141802	12.3653
	GOTERM_MF_FAT	GO:0005254~chloride channel activity	7	0.013074	3.57974	0.316091	17.886
	GOTERM_CC_FAT	GO:0034702~ion channel complex	12	0.0149768	2.31063	0.206563	18.0519
	GOTERM_MF_FAT	GO:0005230~extracellular ligand-gated ion channel activity	7	0.0150653	3.47126	0.342939	20.3322
	GOTERM_MF_FAT	GO:0005253~anion channel activity	7	0.0184322	3.32034	0.367152	24.3142
	GOTERM_CC_FAT	GO:0044456~synapse part	14	0.0224036	2.00909	0.257547	25.839
	GOTERM_MF_FAT	GO:0022834~ligand-gated channel activity	8	0.0431768	2.47012	0.52832	48.3615
	GOTERM_MF_FAT	GO:0015276~ligand-gated ion channel activity	8	0.0431768	2.47012	0.52832	48.3615
2	GOTERM_BP_FAT	GO:0042981~regulation of apoptosis	30	0.0044551	1.73445	0.0989137	7.50045
	GOTERM_BP_FAT	GO:0043068~positive regulation of programmed cell death	17	0.00532261	2.17408	0.111701	8.89785
	GOTERM_BP_FAT	GO:0043067~regulation of programmed cell death	30	0.00532379	1.71277	0.110711	8.89974
	GOTERM_BP_FAT	GO:0010942~positive regulation of cell death	17	0.00573562	2.15683	0.114633	9.55613
	GOTERM_BP_FAT	GO:0010941~regulation of cell death	30	0.00575074	1.70365	0.113926	9.58013
	GOTERM_BP_FAT	GO:0043065~positive regulation of apoptosis	16	0.0112145	2.06269	0.183723	17.8751
	GOTERM_BP_FAT	GO:0006917~induction of apoptosis	12	0.0156858	2.29737	0.23041	24.1238
	GOTERM_BP_FAT	GO:0012502~induction of programmed cell death	12	0.0156858	2.29737	0.23041	24.1238
	GOTERM_BP_FAT	GO:0043066~negative regulation of apoptosis	15	0.0180556	2.0066	0.251176	27.2512
	GOTERM_BP_FAT	GO:0043069~negative regulation of programmed cell death	15	0.0211316	1.96548	0.277832	31.1296
	GOTERM_BP_FAT	GO:0060548~negative regulation of cell death	15	0.0217105	1.95745	0.281156	31.8373
1.9	GOTERM_BP_FAT	GO:0001666~response to hypoxia	8	0.00367757	3.99647	0.0884002	6.23085
	GOTERM_BP_FAT	GO:0070482~response to oxygen levels	8	0.00401348	3.93499	0.0931704	6.78134
1.8	GOTERM_BP_FAT	GO:0048514~blood vessel morphogenesis	14	0.00932091	2.26063	0.163389	15.0851
	GOTERM_BP_FAT	GO:0001568~blood vessel development	16	0.00975033	2.09651	0.166484	15.7255
	GOTERM_BP_FAT	GO:0001944~vasculature development	16	0.0120004	2.04619	0.193956	19.0074
1.79	GOTERM_BP_FAT	GO:0045785~positive regulation of cell adhesion	8	0.000334137	5.94824	0.0145843	0.581851
	GOTERM_BP_FAT	GO:0030155~regulation of cell adhesion	10	0.00263314	3.40125	0.0725729	4.49954
	GOTERM_MF_FAT	GO:0050840~extracellular matrix binding	5	0.00647345	6.54581	0.193956	9.26696
	GOTERM_BP_FAT	GO:0010811~positive regulation of cell-substrate adhesion	5	0.00928672	5.9207	0.164088	15.0339
	GOTERM_BP_FAT	GO:0010810~regulation of cell-substrate adhesion	5	0.035284	3.99647	0.364716	46.5938
1.77	GOTERM_BP_FAT	GO:0045123~cellular extravasation	4	0.000562452	21.3145	0.0212074	0.977591
	GOTERM_CC_FAT	GO:0043235~receptor complex	9	0.00575775	3.29892	0.094808	7.3352
	GOTERM_CC_FAT	GO:0008305~integrin complex	5	0.012505	5.43274	0.184785	15.297
	GOTERM_BP_FAT	GO:0050798~activated T cell proliferation	3	0.0183843	13.7022	0.253631	27.6753
1.66	GOTERM_BP_FAT	GO:0006022~aminoglycan metabolic process	7	0.00539066	4.30389	0.110032	9.00664
	GOTERM_BP_FAT	GO:0030203~glycosaminoglycan metabolic process	6	0.00773585	4.79576	0.144208	12.6812
1.6	GOTERM_BP_FAT	GO:0032844~regulation of homeostatic process	7	0.0107705	3.73004	0.178372	17.2287
	GOTERM_BP_FAT	GO:0034104~negative regulation of tissue remodeling	3	0.0183843	13.7022	0.253631	27.6753
1.59	GOTERM_BP_FAT	GO:0010033~response to organic substance	30	0.00117101	1.89931	0.0370226	2.02517
	GOTERM_BP_FAT	GO:0043627~response to estrogen stimulus	5	0.0187095	4.84421	0.256004	28.0926
	GOTERM_BP_FAT	GO:0009719~response to endogenous stimulus	12	0.0295965	2.08512	0.333946	40.8209
	GOTERM_BP_FAT	GO:0009725~response to hormone stimulus	11	0.0341684	2.13145	0.360128	45.5051
	GOTERM_BP_FAT	GO:0048545~response to steroid hormone stimulus	6	0.0388545	3.19718	0.383967	49.9421
1.53	GOTERM_BP_FAT	GO:0043488~regulation of mRNA stability	4	0.00683286	9.83747	0.130592	11.2832
	GOTERM_BP_FAT	GO:0043487~regulation of RNA stability	4	0.0124831	7.99294	0.198196	19.6955
	GOTERM_BP_FAT	GO:0048255~mRNA stabilization	3	0.0134064	15.9859	0.209847	20.9965
	GOTERM_BP_FAT	GO:0043489~RNA stabilization	3	0.0134064	15.9859	0.209847	20.9965
	GOTERM_BP_FAT	GO:0010608~posttranscriptional regulation of gene expression	10	0.0423818	2.16025	0.401269	53.0548
1.51	GOTERM_MF_FAT	GO:0045028~purinergic nucleotide receptor activity, G-protein coupled	4	0.0434986	5.03524	0.522051	48.6209
	GOTERM_MF_FAT	GO:0001608~nucleotide receptor activity, G-protein coupled	4	0.0434986	5.03524	0.522051	48.6209
1.45	GOTERM_BP_FAT	GO:0043011~myeloid dendritic cell differentiation	3	0.0240114	11.9894	0.291845	34.5832
	GOTERM_BP_FAT	GO:0001773~myeloid dendritic cell activation	3	0.0240114	11.9894	0.291845	34.5832
	GOTERM_BP_FAT	GO:0030099~myeloid cell differentiation	8	0.030408	2.66431	0.336626	41.6791
1.43	GOTERM_BP_FAT	GO:0002526~acute inflammatory response	9	0.00370091	3.55242	0.0880135	6.26919
	GOTERM_BP_FAT	GO:0002253~activation of immune response	9	0.0053379	3.34588	0.109992	8.92232
	GOTERM_BP_FAT	GO:0002541~activation of plasma proteins involved in acute inflammatory response	5	0.0250451	4.44052	0.297809	35.7825
	GOTERM_BP_FAT	GO:0006956~complement activation	5	0.0250451	4.44052	0.297809	35.7825
1.4	GOTERM_MF_FAT	GO:0003924~GTPase activity	9	0.0420388	2.30126	0.547131	47.4342
1.32	GOTERM_BP_FAT	GO:0031668~cellular response to extracellular stimulus	7	0.00258883	4.97339	0.0722652	4.42543
1.31	GOTERM_BP_FAT	GO:0034976~response to endoplasmic reticulum stress	5	0.00810675	6.14842	0.149393	13.2494
	GOTERM_BP_FAT	GO:0051789~response to protein stimulus	8	0.0188588	2.93993	0.256268	28.2833
	GOTERM_BP_FAT	GO:0006984~ER-nuclear signaling pathway	4	0.041732	5.11548	0.401231	52.4955
1.31	GOTERM_MF_FAT	GO:0008009~chemokine activity	5	0.027741	4.30646	0.463494	34.3783
	GOTERM_MF_FAT	GO:0042379~chemokine receptor binding	5	0.030192	4.19603	0.470666	36.8123
	GOTERM_MF_FAT	GO:0005125~cytokine activity	11	0.0490813	2.00011	0.548708	52.9327
1.28	GOTERM_BP_FAT	GO:0032647~regulation of interferon-alpha production	3	0.0183843	13.7022	0.253631	27.6753
	GOTERM_BP_FAT	GO:0001819~positive regulation of cytokine production	6	0.0438042	3.09404	0.408508	54.2576
1.25	GOTERM_BP_FAT	GO:0001819~positive regulation of cytokine production	6	0.0438042	3.09404	0.408508	54.2576
1.24	GOTERM_BP_FAT	GO:0030278~regulation of ossification	6	0.0243135	3.61945	0.293428	34.9358
1.23	GOTERM_BP_FAT	GO:0060044~negative regulation of cardiac muscle cell proliferation	3	0.00912506	19.1831	0.162715	14.7915
	GOTERM_BP_FAT	GO:0060043~regulation of cardiac muscle cell proliferation	3	0.0443472	8.71957	0.409253	54.709
	GOTERM_BP_FAT	GO:0055021~regulation of cardiac muscle growth	3	0.0443472	8.71957	0.409253	54.709
	GOTERM_BP_FAT	GO:0055024~regulation of cardiac muscle tissue development	3	0.0443472	8.71957	0.409253	54.709
1.23	GOTERM_BP_FAT	GO:0045078~positive regulation of interferon-gamma biosynthetic process	3	0.0302426	10.6573	0.336705	41.5051
	GOTERM_BP_FAT	GO:0045072~regulation of interferon-gamma biosynthetic process	3	0.0443472	8.71957	0.409253	54.709
	GOTERM_BP_FAT	GO:0042035~regulation of cytokine biosynthetic process	6	0.0491151	2.99735	0.432851	58.4968
1.18	GOTERM_BP_FAT	GO:0009069~serine family amino acid metabolic process	5	0.00437547	7.26631	0.0981825	7.37118
	GOTERM_MF_FAT	GO:0019842~vitamin binding	9	0.0316736	2.43439	0.466649	38.2425
1.15	GOTERM_BP_FAT	GO:0001819~positive regulation of cytokine production	6	0.0438042	3.09404	0.408508	54.2576
1.12	GOTERM_BP_FAT	GO:0006790~sulfur metabolic process	9	0.00903857	3.06113	0.162557	14.6615
1.12	GOTERM_BP_FAT	GO:0016125~sterol metabolic process	9	0.0026964	3.73696	0.0725088	4.60526
	GOTERM_BP_FAT	GO:0008203~cholesterol metabolic process	7	0.0217952	3.19718	0.280535	31.9404
1.12	GOTERM_BP_FAT	GO:0006693~prostaglandin metabolic process	5	0.000729512	11.4185	0.026133	1.26622
	GOTERM_BP_FAT	GO:0006692~prostanoid metabolic process	5	0.000729512	11.4185	0.026133	1.26622
	GOTERM_BP_FAT	GO:0006690~icosanoid metabolic process	5	0.0206961	4.70173	0.274473	30.5926
	GOTERM_BP_FAT	GO:0033559~unsaturated fatty acid metabolic process	5	0.0250451	4.44052	0.297809	35.7825
	GOTERM_BP_FAT	GO:0001516~prostaglandin biosynthetic process	3	0.0370348	9.59153	0.374281	48.2612
	GOTERM_BP_FAT	GO:0046457~prostanoid biosynthetic process	3	0.0370348	9.59153	0.374281	48.2612
1.1	GOTERM_CC_FAT	GO:0034385~triglyceride-rich lipoprotein particle	3	0.0405485	9.12701	0.36681	42.0798
	GOTERM_CC_FAT	GO:0034361~very-low-density lipoprotein particle	3	0.0405485	9.12701	0.36681	42.0798
1.01	GOTERM_BP_FAT	GO:0006639~acylglycerol metabolic process	5	0.0443355	3.71765	0.410753	54.6994
1	GOTERM_BP_FAT	GO:0060341~regulation of cellular localization	11	0.0295648	2.18441	0.33526	40.7871
	GOTERM_BP_FAT	GO:0051046~regulation of secretion	9	0.0419717	2.30197	0.401416	52.7025
1	GOTERM_BP_FAT	GO:0006885~regulation of pH	4	0.071231	4.12539	0.523314	72.4817
0.99	GOTERM_BP_FAT	GO:0006811~ion transport	37	0.00298738	1.66145	0.0756028	5.09009
	GOTERM_MF_FAT	GO:0022838~substrate specific channel activity	22	0.0034552	2.00011	0.174296	5.05076
	GOTERM_MF_FAT	GO:0022803~passive transmembrane transporter activity	22	0.00405234	1.97271	0.187307	5.89914
	GOTERM_MF_FAT	GO:0015267~channel activity	22	0.00405234	1.97271	0.187307	5.89914
	GOTERM_MF_FAT	GO:0005216~ion channel activity	21	0.00522994	1.96937	0.207149	7.55152
	GOTERM_MF_FAT	GO:0022836~gated channel activity	18	0.00572721	2.09652	0.190936	8.24111
	GOTERM_BP_FAT	GO:0006812~cation transport	24	0.0541414	1.48995	0.457599	62.1653
	GOTERM_MF_FAT	GO:0046873~metal ion transmembrane transporter activity	15	0.0611146	1.69288	0.605649	61.1044
	GOTERM_BP_FAT	GO:0030001~metal ion transport	21	0.0614796	1.51902	0.489069	66.9763
	GOTERM_MF_FAT	GO:0022832~voltage-gated channel activity	10	0.0971986	1.82844	0.715588	78.371
	GOTERM_MF_FAT	GO:0005244~voltage-gated ion channel activity	10	0.0971986	1.82844	0.715588	78.371
	GOTERM_MF_FAT	GO:0005267~potassium channel activity	8	0.0994286	2.02971	0.717571	79.1573
0.97	GOTERM_BP_FAT	GO:0008629~induction of apoptosis by intracellular signals	5	0.0228074	4.56739	0.286866	33.1596
	GOTERM_BP_FAT	GO:0008630~DNA damage response, signal transduction resulting in induction of apoptosis	4	0.0336282	5.56031	0.357114	44.9704
0.94	GOTERM_BP_FAT	GO:0030099~myeloid cell differentiation	8	0.030408	2.66431	0.336626	41.6791
0.93	GOTERM_MF_FAT	GO:0004857~enzyme inhibitor activity	15	0.0170325	2.02031	0.355146	22.6819
0.92	GOTERM_BP_FAT	GO:0031349~positive regulation of defense response	6	0.0320997	3.36545	0.345425	43.4306
0.91	GOTERM_BP_FAT	GO:0042060~wound healing	9	0.0239137	2.56916	0.292359	34.4687
0.9	GOTERM_BP_FAT	GO:0044092~negative regulation of molecular function	11	0.008353	2.66431	0.152363	13.6247
	GOTERM_BP_FAT	GO:0044093~positive regulation of molecular function	18	0.0157989	1.88069	0.230415	24.2759
	GOTERM_BP_FAT	GO:0043085~positive regulation of catalytic activity	15	0.0348095	1.83746	0.363946	46.1333
0.9	GOTERM_BP_FAT	GO:0002253~activation of immune response	9	0.0053379	3.34588	0.109992	8.92232
0.9	GOTERM_MF_FAT	GO:0019900~kinase binding	7	0.0450949	2.69533	0.526355	49.89
0.87	GOTERM_MF_FAT	GO:0004197~cysteine-type endopeptidase activity	6	0.0426686	3.11705	0.533245	47.9493
0.85	GOTERM_BP_FAT	GO:0051090~regulation of transcription factor activity	6	0.0365142	3.25137	0.373256	47.7706
0.85	GOTERM_MF_FAT	GO:0015248~sterol transporter activity	3	0.0289484	10.9097	0.466987	35.5881
	GOTERM_MF_FAT	GO:0017127~cholesterol transporter activity	3	0.0289484	10.9097	0.466987	35.5881
0.83	GOTERM_MF_FAT	GO:0019955~cytokine binding	10	0.00141509	3.71921	0.0992038	2.09814
	GOTERM_MF_FAT	GO:0004896~cytokine receptor activity	6	0.0256565	3.57044	0.4485	32.2398
0.82	GOTERM_BP_FAT	GO:0016125~sterol metabolic process	9	0.0026964	3.73696	0.0725088	4.60526

## Sheet: 3W Hp up
Figure 1-Source Data 2. G0 analysis of upregulated genes in the hippocampus of 3-week-old B6J-nmf205-/- mice. See Figure 1.
N/A

## Sheet: 5W Hp up
Figure 1 -Source Data 2. G0 analysis of upregulated genes in the hippocampus of 5-week-old B6J-nmf205-/- mice. See Figure 1.
Enrichment Score	Category	Term	Count	PValue	Fold Enrichment	Benjamini	FDR
5.26	GOTERM_BP_FAT	GO:0006418~tRNA aminoacylation for protein translation	9	8.41663e-12	48.3368	3.51814e-09	1.18147e-08
	GOTERM_BP_FAT	GO:0043038~amino acid activation	9	8.41663e-12	48.3368	3.51814e-09	1.18147e-08
	GOTERM_BP_FAT	GO:0043039~tRNA aminoacylation	9	8.41663e-12	48.3368	3.51814e-09	1.18147e-08
	GOTERM_MF_FAT	GO:0004812~aminoacyl-tRNA ligase activity	9	1.44255e-11	45.3	2.55331e-09	1.77187e-08
	GOTERM_MF_FAT	GO:0016876~ligase activity, forming aminoacyl-tRNA and related compounds	9	1.44255e-11	45.3	2.55331e-09	1.77187e-08
	GOTERM_MF_FAT	GO:0016875~ligase activity, forming carbon-oxygen bonds	9	1.44255e-11	45.3	2.55331e-09	1.77187e-08
	GOTERM_BP_FAT	GO:0006399~tRNA metabolic process	9	1.3481e-08	19.6769	2.81753e-06	1.89238e-05
	GOTERM_BP_FAT	GO:0034660~ncRNA metabolic process	9	1.20227e-06	11.0074	0.00012563	0.00168766
	GOTERM_BP_FAT	GO:0006412~translation	10	4.06291e-06	7.74466	0.00028301	0.00570312
	GOTERM_MF_FAT	GO:0000049~tRNA binding	4	6.88703e-05	48.32	0.00304298	0.0845599
	GOTERM_MF_FAT	GO:0005524~ATP binding	15	0.00147308	2.51143	0.0508473	1.79441
	GOTERM_MF_FAT	GO:0032559~adenyl ribonucleotide binding	15	0.0016492	2.48219	0.0408766	2.00695
	GOTERM_MF_FAT	GO:0030554~adenyl nucleotide binding	15	0.00265311	2.36091	0.0570841	3.21046
	GOTERM_MF_FAT	GO:0001883~purine nucleoside binding	15	0.00287065	2.34109	0.0549688	3.46945
	GOTERM_MF_FAT	GO:0001882~nucleoside binding	15	0.00304793	2.32606	0.052597	3.68004
	GOTERM_MF_FAT	GO:0032555~purine ribonucleotide binding	15	0.0108049	2.01782	0.137494	12.4918
	GOTERM_MF_FAT	GO:0032553~ribonucleotide binding	15	0.0108049	2.01782	0.137494	12.4918
	GOTERM_MF_FAT	GO:0017076~purine nucleotide binding	15	0.0152169	1.93693	0.165514	17.167
	GOTERM_MF_FAT	GO:0000166~nucleotide binding	16	0.0244172	1.77077	0.239263	26.1871
4.08	GOTERM_BP_FAT	GO:0008652~cellular amino acid biosynthetic process	6	7.91803e-07	33.6893	0.000110318	0.00111148
	GOTERM_BP_FAT	GO:0006563~L-serine metabolic process	4	2.0534e-06	141.174	0.00017165	0.00288239
	GOTERM_BP_FAT	GO:0009309~amine biosynthetic process	6	1.00368e-05	20.3059	0.000599164	0.0140881
	GOTERM_BP_FAT	GO:0006564~L-serine biosynthetic process	3	4.63876e-05	247.055	0.00215218	0.0650964
	GOTERM_BP_FAT	GO:0009069~serine family amino acid metabolic process	4	8.66132e-05	44.919	0.00328603	0.121514
	GOTERM_BP_FAT	GO:0016053~organic acid biosynthetic process	6	0.000235519	10.513	0.00754514	0.3301
	GOTERM_BP_FAT	GO:0046394~carboxylic acid biosynthetic process	6	0.000235519	10.513	0.00754514	0.3301
	GOTERM_BP_FAT	GO:0009070~serine family amino acid biosynthetic process	3	0.00042746	92.6455	0.0126843	0.598373
	GOTERM_BP_FAT	GO:0009064~glutamine family amino acid metabolic process	4	0.000654331	22.9818	0.0169546	0.914601
	GOTERM_BP_FAT	GO:0044271~nitrogen compound biosynthetic process	6	0.0068168	4.90837	0.139708	9.1552
2.7	GOTERM_BP_FAT	GO:0055114~oxidation reduction	9	0.00476003	3.30877	0.1107	6.47841
2.27	GOTERM_MF_FAT	GO:0015171~amino acid transmembrane transporter activity	6	1.69116e-06	28.992	0.000149657	0.00207722
	GOTERM_MF_FAT	GO:0005275~amine transmembrane transporter activity	6	5.39049e-06	23.0095	0.000317989	0.00662089
	GOTERM_BP_FAT	GO:0046942~carboxylic acid transport	6	4.42015e-05	14.973	0.00230692	0.0620295
	GOTERM_BP_FAT	GO:0015849~organic acid transport	6	4.63884e-05	14.8233	0.0019372	0.0650975
	GOTERM_BP_FAT	GO:0006865~amino acid transport	5	0.000177701	17.3982	0.00617134	0.249156
	GOTERM_BP_FAT	GO:0015837~amine transport	5	0.000480483	13.4269	0.0133034	0.672364
	GOTERM_MF_FAT	GO:0015179~L-amino acid transmembrane transporter activity	3	0.00613454	24.9931	0.086766	7.27963
1	GOTERM_BP_FAT	GO:0007050~cell cycle arrest	3	0.0215199	13.0029	0.365346	26.3157
0.76	GOTERM_BP_FAT	GO:0033554~cellular response to stress	6	0.0217503	3.66913	0.354489	26.5589
0.57	GOTERM_MF_FAT	GO:0046983~protein dimerization activity	5	0.0490021	3.55294	0.407333	46.0512

## Sheet: 3W Cb down
Figure 1 -Source Data 2. G0 analysis of downregulated genes in the cerebellum of 3-week-old B6J-nmf205-/- mice. See Figure 1.
Enrichment Score	Category	Term	Count	PValue	Fold Enrichment	Benjamini	FDR
1.69	GOTERM_MF_FAT	GO:0005216~ion channel activity	7	0.00517906	4.29873	0.214514	6.22847
	GOTERM_MF_FAT	GO:0022838~substrate specific channel activity	7	0.00600938	4.16738	0.200863	7.19319
	GOTERM_MF_FAT	GO:0022803~passive transmembrane transporter activity	7	0.00641743	4.1103	0.180926	7.66393
	GOTERM_MF_FAT	GO:0015267~channel activity	7	0.00641743	4.1103	0.180926	7.66393
	GOTERM_MF_FAT	GO:0046873~metal ion transmembrane transporter activity	6	0.0105112	4.43426	0.217828	12.2668
	GOTERM_BP_FAT	GO:0006811~ion transport	9	0.0125431	2.81571	0.822586	16.2013
	GOTERM_MF_FAT	GO:0005261~cation channel activity	5	0.0269713	4.32102	0.370181	28.725
	GOTERM_MF_FAT	GO:0022836~gated channel activity	5	0.0399188	3.81357	0.468169	39.621
	GOTERM_BP_FAT	GO:0030001~metal ion transport	6	0.0451178	3.02381	0.957678	47.6116
	GOTERM_CC_FAT	GO:0034702~ion channel complex	4	0.0489687	4.79632	0.949581	43.7567
1.51	GOTERM_BP_FAT	GO:0007155~cell adhesion	8	0.0114393	3.17653	0.991161	14.88
	GOTERM_BP_FAT	GO:0022610~biological adhesion	8	0.0115441	3.17088	0.908013	15.0063
1.24	GOTERM_MF_FAT	GO:0043167~ion binding	30	0.00231353	1.63439	0.193787	2.82785
	GOTERM_MF_FAT	GO:0043169~cation binding	29	0.0041961	1.59983	0.229492	5.07448
	GOTERM_MF_FAT	GO:0046872~metal ion binding	28	0.0077656	1.55871	0.187101	9.2037
	GOTERM_MF_FAT	GO:0008237~metallopeptidase activity	5	0.0106219	5.73055	0.198038	12.3883

## Sheet: 5W Cb down
Figure 1 -Source Data 2. G0 analysis of downregulated genes in the cerebellum of 5-week-old B6J-nmf205-/- mice. See Figure 1.
Enrichment Score	Category	Term	Count	PValue	Fold Enrichment	Benjamini	FDR
6.3	GOTERM_CC_FAT	GO:0016021~integral to membrane	113	0.000749276	1.25632	0.0312815	0.943967
	GOTERM_CC_FAT	GO:0031224~intrinsic to membrane	115	0.00135459	1.23424	0.0402212	1.70056
4.09	GOTERM_MF_FAT	GO:0022838~substrate specific channel activity	22	5.1988e-08	4.2294	9.07186e-06	7.10726e-05
	GOTERM_MF_FAT	GO:0015267~channel activity	22	6.5057e-08	4.17146	7.56826e-06	8.89392e-05
	GOTERM_MF_FAT	GO:0022803~passive transmembrane transporter activity	22	6.5057e-08	4.17146	7.56826e-06	8.89392e-05
	GOTERM_MF_FAT	GO:0005261~cation channel activity	18	1.05141e-07	5.02319	9.17353e-06	0.000143738
	GOTERM_MF_FAT	GO:0022836~gated channel activity	19	1.21789e-07	4.67957	8.50085e-06	0.000166498
	GOTERM_MF_FAT	GO:0005216~ion channel activity	21	1.45875e-07	4.1644	8.48505e-06	0.000199426
	GOTERM_MF_FAT	GO:0046873~metal ion transmembrane transporter activity	19	1.95699e-07	4.53434	9.75693e-06	0.000267539
	GOTERM_BP_FAT	GO:0006811~ion transport	27	4.96547e-06	2.74083	0.00487906	0.00782989
	GOTERM_BP_FAT	GO:0030001~metal ion transport	20	1.11581e-05	3.27043	0.00548034	0.0175941
	GOTERM_MF_FAT	GO:0015276~ligand-gated ion channel activity	10	2.14508e-05	6.52909	0.000623673	0.0293213
	GOTERM_MF_FAT	GO:0022834~ligand-gated channel activity	10	2.14508e-05	6.52909	0.000623673	0.0293213
	GOTERM_BP_FAT	GO:0006813~potassium ion transport	11	7.33387e-05	4.96902	0.0237928	0.115587
	GOTERM_BP_FAT	GO:0006812~cation transport	20	8.97638e-05	2.80686	0.0218628	0.141457
	GOTERM_MF_FAT	GO:0005267~potassium channel activity	10	0.000100847	5.36499	0.00219742	0.13778
	GOTERM_MF_FAT	GO:0005244~voltage-gated ion channel activity	11	0.000262529	4.25303	0.00457125	0.358306
	GOTERM_MF_FAT	GO:0022832~voltage-gated channel activity	11	0.000262529	4.25303	0.00457125	0.358306
	GOTERM_MF_FAT	GO:0030955~potassium ion binding	9	0.000299019	5.2786	0.00495783	0.408015
	GOTERM_MF_FAT	GO:0022843~voltage-gated cation channel activity	9	0.000517449	4.86621	0.00817713	0.705089
	GOTERM_BP_FAT	GO:0015672~monovalent inorganic cation transport	13	0.0010061	3.10098	0.15232	1.57482
	GOTERM_MF_FAT	GO:0031420~alkali metal ion binding	10	0.00296122	3.35963	0.0405547	3.9732
	GOTERM_MF_FAT	GO:0005249~voltage-gated potassium channel activity	7	0.00302309	4.89352	0.0398258	4.05462
	GOTERM_CC_FAT	GO:0034702~ion channel complex	9	0.00343634	3.6155	0.0703768	4.26216
	GOTERM_CC_FAT	GO:0034703~cation channel complex	6	0.016733	4.00876	0.212187	19.2266
4.06	GOTERM_CC_FAT	GO:0045202~synapse	20	6.27125e-07	3.97944	0.000132942	0.000793529
	GOTERM_CC_FAT	GO:0030054~cell junction	22	1.51639e-05	2.97103	0.00107102	0.0191859
	GOTERM_CC_FAT	GO:0044456~synapse part	12	0.000508648	3.59276	0.0266049	0.641712
	GOTERM_BP_FAT	GO:0006887~exocytosis	8	0.000806688	5.25648	0.146988	1.26454
	GOTERM_CC_FAT	GO:0044459~plasma membrane part	42	0.00135233	1.63247	0.0466895	1.69775
	GOTERM_BP_FAT	GO:0032940~secretion by cell	8	0.0145193	3.10867	0.451334	20.5973
2.69	GOTERM_MF_FAT	GO:0005262~calcium channel activity	6	0.00291804	6.10662	0.0416049	3.91632
2.68	GOTERM_MF_FAT	GO:0005509~calcium ion binding	35	3.34548e-08	2.88368	1.16756e-05	4.57359e-05
	GOTERM_MF_FAT	GO:0043167~ion binding	85	1.57176e-05	1.49535	0.000548396	0.0214853
	GOTERM_MF_FAT	GO:0043169~cation binding	83	3.45544e-05	1.47858	0.000861036	0.0472289
	GOTERM_MF_FAT	GO:0046872~metal ion binding	82	4.56767e-05	1.47405	0.0010622	0.0624264
2.06	GOTERM_MF_FAT	GO:0005083~small GTPase regulator activity	15	4.11656e-06	4.65527	0.000179569	0.00562759
	GOTERM_MF_FAT	GO:0017137~Rab GTPase binding	6	5.74837e-06	21.8553	0.000222885	0.00785829
	GOTERM_MF_FAT	GO:0030695~GTPase regulator activity	18	1.7931e-05	3.45083	0.000568743	0.0245106
	GOTERM_MF_FAT	GO:0060589~nucleoside-triphosphatase regulator activity	18	2.21469e-05	3.39441	0.000594389	0.0302727
	GOTERM_MF_FAT	GO:0017016~Ras GTPase binding	7	0.000160899	8.49927	0.00329797	0.21974
	GOTERM_MF_FAT	GO:0031267~small GTPase binding	7	0.000195088	8.21116	0.00377576	0.266375
	GOTERM_MF_FAT	GO:0051020~GTPase binding	7	0.000256852	7.81384	0.00470746	0.350571
	GOTERM_BP_FAT	GO:0051056~regulation of small GTPase mediated signal transduction	11	0.00123949	3.48703	0.141619	1.9368
	GOTERM_MF_FAT	GO:0019899~enzyme binding	10	0.00592385	3.0222	0.0713804	7.80143
2.01	GOTERM_CC_FAT	GO:0043005~neuron projection	12	0.00167362	3.10884	0.0434175	2.09719
	GOTERM_CC_FAT	GO:0030425~dendrite	8	0.00170571	4.61615	0.0394155	2.137
	GOTERM_CC_FAT	GO:0042995~cell projection	18	0.00898868	1.98695	0.13692	10.7967
1.98	GOTERM_MF_FAT	GO:0005516~calmodulin binding	7	0.00603297	4.24963	0.0702352	7.9397
1.93	GOTERM_MF_FAT	GO:0005249~voltage-gated potassium channel activity	7	0.00302309	4.89352	0.0398258	4.05462
	GOTERM_MF_FAT	GO:0005242~inward rectifier potassium channel activity	3	0.0216063	12.9766	0.206267	25.8156
1.91	GOTERM_MF_FAT	GO:0022834~ligand-gated channel activity	10	2.14508e-05	6.52909	0.000623673	0.0293213
	GOTERM_MF_FAT	GO:0015276~ligand-gated ion channel activity	10	2.14508e-05	6.52909	0.000623673	0.0293213
1.89	GOTERM_MF_FAT	GO:0004089~carbonate dehydratase activity	4	0.00203457	15.3796	0.0304312	2.74588
	GOTERM_MF_FAT	GO:0016836~hydro-lyase activity	4	0.0222601	6.59127	0.20632	26.4905
1.72	GOTERM_BP_FAT	GO:0006887~exocytosis	8	0.000806688	5.25648	0.146988	1.26454
	GOTERM_BP_FAT	GO:0015833~peptide transport	5	0.00390495	7.689	0.295562	5.9834
	GOTERM_BP_FAT	GO:0030073~insulin secretion	4	0.00588362	10.7076	0.383917	8.88561
	GOTERM_BP_FAT	GO:0030072~peptide hormone secretion	4	0.0112206	8.50313	0.442888	16.3008
	GOTERM_BP_FAT	GO:0046903~secretion	9	0.0115017	2.94339	0.434328	16.6752
	GOTERM_BP_FAT	GO:0002790~peptide secretion	4	0.0131232	8.03073	0.432057	18.8047
	GOTERM_BP_FAT	GO:0032940~secretion by cell	8	0.0145193	3.10867	0.451334	20.5973
	GOTERM_BP_FAT	GO:0046879~hormone secretion	4	0.0186396	7.05138	0.496624	25.6738
	GOTERM_BP_FAT	GO:0009914~hormone transport	4	0.0198746	6.88349	0.49432	27.1352
	GOTERM_BP_FAT	GO:0016192~vesicle-mediated transport	13	0.0277268	2.0163	0.499635	35.8155
	GOTERM_BP_FAT	GO:0010817~regulation of hormone levels	6	0.0319089	3.38797	0.500629	40.0334
	GOTERM_BP_FAT	GO:0017156~calcium ion-dependent exocytosis	3	0.033327	10.3252	0.501201	41.4037
1.62	GOTERM_BP_FAT	GO:0051056~regulation of small GTPase mediated signal transduction	11	0.00123949	3.48703	0.141619	1.9368
1.55	GOTERM_CC_FAT	GO:0044456~synapse part	12	0.000508648	3.59276	0.0266049	0.641712
	GOTERM_CC_FAT	GO:0008021~synaptic vesicle	6	0.00421665	5.60048	0.0782102	5.20638
	GOTERM_CC_FAT	GO:0030136~clathrin-coated vesicle	7	0.00585285	4.27216	0.098508	7.1585
	GOTERM_CC_FAT	GO:0030135~coated vesicle	7	0.0133443	3.5831	0.184073	15.6325
1.54	GOTERM_BP_FAT	GO:0045663~positive regulation of myoblast differentiation	3	0.00110997	54.2074	0.144676	1.73606
	GOTERM_BP_FAT	GO:0051149~positive regulation of muscle cell differentiation	3	0.00636423	24.0922	0.383535	9.57776
	GOTERM_BP_FAT	GO:0045661~regulation of myoblast differentiation	3	0.00788362	21.683	0.385692	11.7337
	GOTERM_BP_FAT	GO:0048742~regulation of skeletal muscle fiber development	3	0.0199162	13.5519	0.483415	27.184
	GOTERM_BP_FAT	GO:0060284~regulation of cell development	7	0.0226876	3.18199	0.495905	30.364
	GOTERM_BP_FAT	GO:0048641~regulation of skeletal muscle tissue development	3	0.0304236	10.8415	0.515475	38.5661
	GOTERM_BP_FAT	GO:0051153~regulation of striated muscle cell differentiation	3	0.0363339	9.8559	0.517659	44.2129
1.52	GOTERM_MF_FAT	GO:0005262~calcium channel activity	6	0.00291804	6.10662	0.0416049	3.91632
	GOTERM_BP_FAT	GO:0006816~calcium ion transport	7	0.00653018	4.18129	0.369317	9.81562
	GOTERM_BP_FAT	GO:0015674~di-, tri-valent inorganic cation transport	7	0.0239493	3.14246	0.475509	31.7681
1.48	GOTERM_BP_FAT	GO:0007267~cell-cell signaling	12	0.00227476	2.99076	0.220609	3.52749
	GOTERM_BP_FAT	GO:0007268~synaptic transmission	9	0.00323888	3.65443	0.273522	4.98712
	GOTERM_BP_FAT	GO:0019226~transmission of nerve impulse	9	0.0130345	2.87827	0.444244	18.6895
1.46	GOTERM_BP_FAT	GO:0048858~cell projection morphogenesis	9	0.00688632	3.22024	0.364769	10.3241
	GOTERM_BP_FAT	GO:0032990~cell part morphogenesis	9	0.00909618	3.06835	0.411074	13.4196
	GOTERM_BP_FAT	GO:0048812~neuron projection morphogenesis	8	0.0109882	3.2853	0.453721	15.99
	GOTERM_BP_FAT	GO:0048666~neuron development	10	0.0198192	2.47523	0.505503	27.0703
	GOTERM_BP_FAT	GO:0030182~neuron differentiation	12	0.0222898	2.17373	0.500361	29.9157
	GOTERM_BP_FAT	GO:0032989~cellular component morphogenesis	11	0.0235474	2.26508	0.478993	31.3238
	GOTERM_BP_FAT	GO:0031175~neuron projection development	8	0.0312718	2.65235	0.508966	39.4081
	GOTERM_BP_FAT	GO:0030030~cell projection organization	10	0.0325516	2.26572	0.500201	40.6581
	GOTERM_BP_FAT	GO:0007411~axon guidance	5	0.0462637	3.68758	0.55893	52.6195
1.44	GOTERM_BP_FAT	GO:0051056~regulation of small GTPase mediated signal transduction	11	0.00123949	3.48703	0.141619	1.9368
	GOTERM_MF_FAT	GO:0005099~Ras GTPase activator activity	5	0.014168	5.32372	0.152954	17.7228
	GOTERM_BP_FAT	GO:0032313~regulation of Rab GTPase activity	4	0.0163017	7.41298	0.47669	22.832
	GOTERM_BP_FAT	GO:0032483~regulation of Rab protein signal transduction	4	0.0163017	7.41298	0.47669	22.832
	GOTERM_MF_FAT	GO:0005097~Rab GTPase activator activity	4	0.0236824	6.43798	0.212576	27.939
	GOTERM_BP_FAT	GO:0032318~regulation of Ras GTPase activity	5	0.0244374	4.51729	0.473399	32.3043
	GOTERM_BP_FAT	GO:0043087~regulation of GTPase activity	5	0.0393882	3.88584	0.532892	46.9368
1.44	GOTERM_BP_FAT	GO:0007155~cell adhesion	15	0.023086	1.93253	0.491686	30.8103
	GOTERM_BP_FAT	GO:0022610~biological adhesion	15	0.0233971	1.92909	0.486388	31.1569
1.42	GOTERM_BP_FAT	GO:0044057~regulation of system process	8	0.0212605	2.87668	0.494809	28.743
	GOTERM_BP_FAT	GO:0048167~regulation of synaptic plasticity	4	0.0282118	6.02305	0.497176	36.3185
1.32	GOTERM_BP_FAT	GO:0006887~exocytosis	8	0.000806688	5.25648	0.146988	1.26454
	GOTERM_BP_FAT	GO:0032940~secretion by cell	8	0.0145193	3.10867	0.451334	20.5973
1.24	GOTERM_MF_FAT	GO:0004672~protein kinase activity	18	0.00444929	2.13679	0.0560098	5.91409
	GOTERM_BP_FAT	GO:0006468~protein amino acid phosphorylation	16	0.031031	1.80691	0.514264	39.1702
	GOTERM_MF_FAT	GO:0030554~adenyl nucleotide binding	31	0.0493965	1.39769	0.357246	49.97
1.16	GOTERM_MF_FAT	GO:0008237~metallopeptidase activity	8	0.0184744	2.96078	0.18936	22.5026
	GOTERM_MF_FAT	GO:0004222~metalloendopeptidase activity	6	0.0243018	3.64254	0.212193	28.5615
1.14	GOTERM_BP_FAT	GO:0060284~regulation of cell development	7	0.0226876	3.18199	0.495905	30.364
	GOTERM_BP_FAT	GO:0010975~regulation of neuron projection development	4	0.026712	6.1512	0.495317	34.7508
	GOTERM_BP_FAT	GO:0010769~regulation of cell morphogenesis involved in differentiation	4	0.0313431	5.78213	0.501947	39.4784
	GOTERM_BP_FAT	GO:0031344~regulation of cell projection organization	4	0.0436681	5.07204	0.557118	50.5447
	GOTERM_BP_FAT	GO:0022604~regulation of cell morphogenesis	5	0.0448384	3.7256	0.553762	51.4905
1.12	GOTERM_MF_FAT	GO:0008373~sialyltransferase activity	3	0.0329532	10.3812	0.270989	36.7511
	GOTERM_BP_FAT	GO:0043413~biopolymer glycosylation	5	0.0368137	3.97124	0.515398	44.6493
	GOTERM_BP_FAT	GO:0006486~protein amino acid glycosylation	5	0.0368137	3.97124	0.515398	44.6493
	GOTERM_BP_FAT	GO:0070085~glycosylation	5	0.0368137	3.97124	0.515398	44.6493
0.94	GOTERM_MF_FAT	GO:0004714~transmembrane receptor protein tyrosine kinase activity	4	0.0465128	4.94345	0.347028	47.8549
0.92	GOTERM_MF_FAT	GO:0019207~kinase regulator activity	5	0.0208596	4.7403	0.205392	25.0379
	GOTERM_BP_FAT	GO:0045859~regulation of protein kinase activity	7	0.0437578	2.72009	0.551266	50.6178
	GOTERM_BP_FAT	GO:0043549~regulation of kinase activity	7	0.0495881	2.63508	0.566103	55.1579
0.91	GOTERM_BP_FAT	GO:0006941~striated muscle contraction	3	0.0426451	9.03457	0.55512	49.7039
	GOTERM_BP_FAT	GO:0006936~muscle contraction	4	0.0495863	4.81844	0.572187	55.1565
0.84	GOTERM_MF_FAT	GO:0005262~calcium channel activity	6	0.00291804	6.10662	0.0416049	3.91632
	GOTERM_BP_FAT	GO:0048878~chemical homeostasis	12	0.0122988	2.37622	0.440354	17.7286

## Sheet: 3W Hp down
Figure 1 -Source Data 2. G0 analysis of downregulated genes in the hippocampus of 3-week-old B6J-nmf205-/- mice. See Figure 1.
N/A

## Sheet: 5W Hp down
Figure 1 -Source Data 2. G0 analysis of downregulated genes in the hippocampus of 5-week-old B6J-nmf205-/- mice. See Figure 1.
N/A

## Sheet: IPA upstream analysis
Figure 1 -Source Data 2. IPA upstream regulator analysis of differentially expressed genes in the B6J-nmf205-/- brain. See Figure 1.
Simplified results are shown in Figure 1C.
		3W Cerebellum			5W Cerebellum			3W Hippocampus			5W Hippocampus
		Upstream Regulator	Prediction	p-value	Upstream Regulator	Prediction	p-value	Upstream Regulator	Prediction	p-value	Upstream Regulator	Prediction	p-value
Analysis of upregulated genes	1	ATF4	Activated	9.32E-40	lipopolysaccharide	Activated	5.87E-55	ATF4	Activated	1.22E-14	ATF4	Activated	3.13E-39
	2	EIF2AK3	Activated	2.07E-36	IFNG	Activated	1.07E-49	ALDH2	Inhibited	9.39E-14	EIF2AK3		2.27E-31
	3	tosedostat	Activated	1.27E-25	TNF	Activated	5.47E-42	histidinol		1.17E-09	tosedostat	Activated	3.83E-23
	4	ALDH2	Inhibited	3.18E-22	TGFB1	Activated	4.02E-36	MXI1		3.27E-08	ALDH2	Inhibited	2.10E-20
	5	TGFB1	Activated	3.00E-18	tretinoin	Activated	5.57E-33	EIF2AK3		6.30E-08	TRIB3	Inhibited	7.85E-15
	6	D-glucose		4.00E-17	IL1B	Activated	2.38E-31	EIF2AK4		6.66E-08	CNB-001	Activated	4.04E-13
	7	TRIB3	Inhibited	9.26E-17	dexamethasone		1.10E-30	TRIB3		1.34E-07	tunicamycin	Activated	1.42E-12
	8	25-hydroxycholesterol	Activated	2.80E-16	EIF2AK3	Activated	1.15E-29	tosedostat		2.37E-07	D-glucose		5.47E-12
	9	thapsigargin	Activated	8.35E-16	ATF4	Activated	1.60E-28	D-glucose		1.20E-06	beta-estradiol		1.03E-11
	10	beta-estradiol	Activated	5.82E-15	E. coli B4 lipopolysaccharide	Activated	1.77E-25	25-hydroxycholesterol		2.19E-06	25-hydroxycholesterol	Activated	2.23E-11
	11	U0126	Inhibited	2.71E-14	beta-estradiol		2.03E-25	GNE		3.55E-06	EIF2AK4	Activated	3.31E-11
	12	lipopolysaccharide	Activated	1.58E-13	Ifnar	Activated	3.29E-25	glutamine		5.29E-06	FOXO3		1.29E-10
	13	tunicamycin	Activated	3.41E-13	poly rI:rC-RNA	Activated	8.01E-23	CNB-001		9.28E-06	L-serine		1.35E-10
	14	CNB-001	Activated	1.35E-12	tosedostat	Activated	1.71E-22	L-serine		9.28E-06	thapsigargin	Activated	1.45E-10
	15	ADRB		1.95E-12	DYSF		5.29E-22	bexarotene		1.10E-05	MYC		2.46E-10
	16	17-alpha-ethinylestradiol		2.67E-12	APP	Activated	6.57E-22	L-histidine		1.11E-05	leucine		3.15E-10
	17	dexamethasone		3.71E-12	STAT1	Activated	4.01E-21	TGFB1		1.96E-05	MXI1	Inhibited	1.26E-09
	18	PDGF BB	Activated	1.10E-11	SB203580	Inhibited	4.45E-21	amino acids		3.89E-05	histidinol		1.45E-09
	19	Vegf	Activated	2.19E-11	thapsigargin	Activated	1.93E-20	FOXO3		4.15E-05	bexarotene		1.78E-09
	20	CREB1	Activated	8.35E-11	EGR1	Activated	3.39E-20	THBS4		5.90E-05	Collagen(s)		6.53E-09
Analysis of downregulated genes	1	tacrolimus		1.04E-04	ATN1		1.16e-09	N/A			LGR5		9.53E-04
	2	HTT		1.48E-03	CREB1	Activated	7.19e-07				RYR1		1.91E-03
	3	ATN1		1.81E-03	HTT		1.9e-06				Rab11		1.91E-03
	4	isoproterenol		1.97E-03	tacrolimus		5.04e-06				FREM1		2.86E-03
	5	SCP2		2.41E-03	REST		2.01e-05				tyrphostin AG 18		2.86E-03
	6	SREBF2		2.42E-03	nifedipine		3.16e-05				alpha-amino-3-hydroxy-5-methyl-4-isoxazolepropionic acid		4.76E-03
	7	nifedipine		2.84E-03	PNKD		0.00015				dexfenfluramine		4.76E-03
	8	SCX		2.95E-03	CACNA1D		0.000446				JAK2		5.51E-03
	9	2,3 butanedione monoxime		3.23E-03	potassium chloride		0.000553				2,3-dioxo-6-nitro-7-sulfamoylbenzo(f)quinoxaline		5.71E-03
	10	CREBBP		3.45E-03	L-dopa		0.000685				Ampa Receptor		5.71E-03
	11	MARCH6		3.86E-03	mir-185		0.00146				GRK5		5.71E-03
	12	MYLIP		3.86E-03	T3-TR-RXR	Inhibited	0.00157				HOXC11		5.71E-03
	13	RO31-9790		3.86E-03	dopamine		0.00171				ARHGEF1		7.60E-03
	14	clofazimine		3.86E-03	ACKR1		0.00178				DLG4		7.60E-03
	15	columbamine		3.86E-03	TWIST		0.00218				MAOA		7.60E-03
	16	impromidine		3.86E-03	COMT		0.00302				venlafaxine		7.60E-03
	17	SBDS		4.36E-03	flupenthixol		0.00302				HNF1A		7.95E-03
	18	NKX2-1		4.54E-03	BDNF		0.00374				valproic acid		8.00E-03
	19	bucladesine		5.64E-03	EMX2		0.004				Hdac		8.57E-03
	20	EPAS1		5.64E-03	P2RY14		0.00477				tunicamycin		8.57E-03
