# Supplementary material for: Activation of GCN2 kinase by ribosome stalling links translation elongation with translation initiation
Source: eLife. 2016 Apr 16;5:e14295. doi: 10.7554/eLife.14295 (PMC4917338; doi:10.7554/eLife.14295)
Supplement: Figure 1—source data 3. — DOI: http://dx.doi.org/10.7554/eLife.14295.006 [file elife-14295-fig1-data3.xlsx]

## Sheet: Inflammatory gene list
Figure 1 -Source Data 3. Expression of inflammatory related genes. See Figure 1 .
Microglia and astrocyte related genes were from previous reports, (Orre et al., 2014 & Chiu et al., 2013) were obtained from the Glia Open Access Database (GOAD).
http://bioinf.nl:8080/GOAD/databaseSelectServlet
From GOAD, significantly (p < 0.05) up or downregulated genes with fold changes more than 1.5 fold were used.
GOAD gene list (2074 genes)		Inflammatory related genes differentially expressed in B6J-nmf205-/- brain relative to B6J (249 genes)
GOAD microglial genes (1498 genes)	GOAD astrocyte genes (748 genes)	Microglia only genes (150 genes)	Astrocyte only genes (60 genes)	Microglia & astrocyte genes (39 genes)
0610009B22RIK	1600014C23RIK	5430435G22RIK	ACSL5	ANXA4
0610031J06RIK	1700016K19RIK	ABCA1	ALDH18A1	ASNS
0610040J01RIK	1700017B05RIK	ADAP2	ALDH1L2	CCL3
1500012F01RIK	1700019G17RIK	AF529169	ART3	CCL6
1700001K19RIK	1700084C01RIK	AI607873	ATP13A5	CD52
1700026D08RIK	2610034M16RIK	APOC1	ATP2B4	CD9
1810011O10RIK	4930506M07RIK	APOE	BEND6	CLEC7A
2010012O05RIK	9330159F19RIK	ATF5	C4B	COX6A2
2010015L04RIK	AACS	ATP6V0D2	CCNJL	CST7
2010111I01RIK	AASS	AXL	CD24A	CTSS
2310022B05RIK	ABAT	B2M	CLIC1	CXCL10
2410015M20RIK	ABCB9	BC028528	CTH	CYTH4
2510009E07RIK	ABCC9	BMP2K	CTXN1	ENTPD1
2900026A02RIK	ABCD2	C3AR1	DHRS7	ETV5
3110043O21RIK	ABHD2	CAMKV	DIO2	EVI2A
4833439L19RIK	ABHD6	CAPG	FBXL22	GCNT1
4930404N11RIK	ACAT3	CASP8	FCER1G	GPR84
4930427A07RIK	ACOT10	CD33	FCGR2B	GSTO1
4930486L24RIK	ACOT11	CD34	FCGR3	IFIT2
4931406P16RIK	ACOT9	CD63	FCRLS	IFIT3
5031414D18RIK	ACSBG1	CD68	GAP43	INPP5D
5430435G22RIK	ACSL3	CD72	GFAP	IRF7
9530068E07RIK	ACSL5	CD74	GLCE	ITGAX
9630033F20RIK	ACSL6	CD84	GRIN2C	LAP3
A430105I19RIK	ACSS1	CD86	HAPLN1	LDLR
AB124611	ACSS2	CD93	IFI44	LGI2
ABCA1	ADAMTSL2	CDKN1A	ISG20	LYZ2
ABCB1B	ADHFE1	CITED2	LCP1	MTHFD2
ABCC3	ADK	CLEC2D	LDB2	PHGDH
ABCC5	ADORA2B	CLIC4	LMO4	PQLC3
ABCD2	AEBP1	CSF1	LRRC4	RGS10
ABCF2	AF251705	CSF1R	LY86	SLC39A12
ABCG1	AFAP1L2	CTLA2A	LYPD6	SPP1
ABHD15	AGL	CTSD	MAL2	ST8SIA6
ABI1	AGPAT5	CTSZ	NOV	THBS1
ABI2	AHNAK	CX3CR1	NPAS4	TREM2
ABL1	AI464131	CXCL16	NSG2	TYROBP
ACAA2	AI661453	CYBA	NUDT10	USP18
ACACA	AK1	DAB2	OLFML3	VEGFA
ACOT1	AKR1C14	DACT1	OSMR
ACOT10	ALDH18A1	EIF4EBP1	PEX11A
ACPP	ALDH1L1	EMR1	PHACTR3
ACTB	ALDH1L2	EPRS	SERPINA3N
ACTG1	ALDOC	FN1	SLC15A2
ACTR3	ALG8	FOSL2	SLC25A18
ACTR3B	ALKBH7	FOXN2	SLC29A4
ACVR2B	AMPD2	FRMD4B	SLFN5
ACY1	ANGPTL4	FXYD5	ST6GALNAC5
ADA	ANKRD29	GALNT7	ST8SIA5
ADAM17	ANXA4	GAS7	SULF1
ADAM8	APBB1IP	GCA	SYT5
ADAM9	APLN	GDF15	TGFB1
ADAMTS1	APLP1	GPNMB	TM7SF2
ADAMTSL2	APOL9A	GPR137B	TMEM132A
ADAP1	APOL9B	GPR56	TMEM25
ADAP2	ARHGAP9	GPX3	TMTC4
ADARB1	ARHGDIG	GRN	TPRKB
ADD3	ARL4D	GUSB	UBASH3B
ADH5	ARMC3	GVIN1	WSCD2
ADI1	ARNT2	H2-AA	XAF1
ADIPOR1	ARRB1	H2-AB1
ADM	ART3	H2-K1
ADORA1	ARX	HEXA
ADRB2	ASNS	HIST1H1C
ADRBK1	ASPG	HSPA9
ADSSL1	ASTN1	ID3
AEBP2	ATP13A4	IFI30
AF529169	ATP13A5	IFITM3
AFAP1L1	ATP1A1	IGF1
AGAP1	ATP1A2	IL2RG
AGPAT4	ATP2B4	IRGM2
AHCYL1	ATP9A	ISOC1
AI607873	ATXN2	ITGB2
AIG1	B3GALTL	ITPKB
AKAP5	B4GALT1	KCNJ2
AKT3	BAALC	KCNK6
ALCAM	BAG1	KLHL6
ALDH3B1	BAI3	LAG3
ALDOA	BBC3	LEPROTL1
ALDOC	BBOX1	LGALS3BP
ALG10B	BC005764	LILRB4
ALKBH2	BCL2A1C	LIPA
ALOX5AP	BCL3	LPL
ANGPTL4	BEND6	MAMDC2
ANGPTL7	BIK	MICAL2
ANK	BTBD17	MPEG1
ANKRD33B	C1QTNF4	MS4A6C
ANKRD37	C4B	MYC
ANPEP	CAB39	NBL1
ANTXR2	CABLES1	NEURL1A
ANXA2	CACNB3	NFIL3
ANXA4	CALM2	NPL
ANXA5	CAR14	NPNT
AOAH	CAR2	NR4A2
AP2B1	CASP4	NR4A3
APBB2	CAST	NRP1
APH1C	CBR3	OASL2
API5	CBS	ODC1
APLP2	CCBL1	OLFR111
APOC1	CCDC102A	P2RY12
APOC2	CCDC19	P2RY13
APOC4	CCK	PHLDA3
APOE	CCL3	PHYHD1
APOLD1	CCL4	PID1
ARAP2	CCL5	PKIB
AREG	CCL6	PLAU
ARHGAP12	CCNJL	PLD4
ARHGAP22	CD14	PLEK
ARHGAP24	CD24A	PLEKHO1
ARHGAP26	CD3D	PLIN2
ARHGAP4	CD40	PLP2
ARHGEF10L	CD52	PNP
ARHGEF7	CD83	PON3
ARID3A	CD9	PRCP
ARIH1	CDC20	PRR15
ARIH2	CDC42EP5	PSAT1
ARL11	CDH19	PTCHD1
ARL5C	CDH2	PXDN
ARL8B	CDH20	QPCT
ARMC2	CDT1	RTP4
ARMC3	CEND1	RXRG
ARNT2	CGREF1	SCPEP1
ARPC2	CH25H	SELPLG
ARPC5	CHAF1A	SERPINB9
ARRB1	CHCHD10	SERPINE2
ARRDC4	CHGB	SERPINF1
ASB10	CHST1	SLA
ASB11	CHST8	SLC2A6
ASB15	CIDEB	SLC40A1
ASB2	CITED4	SLC43A3
ASF1B	CKAP5	SLC7A1
ASNS	CKB	SLC7A11
ASPM	CLCN2	SLCO2B1
ASXL1	CLEC7A	SOAT1
ATAD2	CLIC1	SPEG
ATF5	CLIP1	SRGN
ATG12	CLU	ST3GAL5
ATG16L2	CML1	STAB1
ATG7	CML3	STARD4
ATG9A	CML5	TANC2
ATOX1	CMPK2	TECPR1
ATP1A3	CMTM3	TGFBR1
ATP1B3	CNP	TGFBR2
ATP5B	CNTFR	TIMP2
ATP6V0A2	COBLL1	TMEM178
ATP6V0C	CORO1A	TPCN2
ATP6V0D1	COTL1	TRIB3
ATP6V0D2	COX6A2	TXNIP
ATP6V0E2	COX7A2L	UNC93B1
ATP6V1A	CPEB3	VAT1
ATP6V1B2	CPLX1
ATP6V1C1	CPNE8
ATP6V1D	CRLF3
ATP6V1G1	CROCC
ATP8A1	CROT
ATP8A2	CS
ATXN10	CSGALNACT1
AVPI1	CST3
AXL	CST7
B2M	CTH
B3GNTL1	CTSF
B4GALT4	CTSS
B4GALT5	CTXN1
BAIAP2L2	CTXN2
BANK1	CXCL10
BBS10	CXCL14
BBS9	CXCL5
BC028528	CXCR3
BCAN	CXCR6
BCAR3	CYGB
BCL2	CYP2J9
BCL2A1A	CYP4F15
BCL2A1C	CYP51
BCL2A1D	CYP7B1
BCL3	CYTH4
BCL6	D630039A03RIK
BHLHE40	DAP
BIN1	DBP
BMF	DBX2
BMP2K	DDT
BNIP3	DEXI
BRCA1	DFNA5
BRI3BP	DHCR24
BSG	DHCR7
BST1	DHRS13
BST2	DHRS7
BTBD3	DHX58
BTG2	DIO2
BTLA	DMP1
BUD31	DMRTA2
C1GALT1C1	DNAJC10
C1QBP	DNER
C3AR1	DOK4
C77080	DOK7
CACNA1A	DOLPP1
CACNA1D	DTX1
CACNB2	DUSP2
CACNB4	DUSP26
CADM1	DUSP3
CALM1	DUSP7
CALM2	DYNC1I1
CALM3	EEF1A1
CALR	EGR1
CAMK2N1	EGR2
CAMKK1	EIF1A
CAMKV	ELOVL2
CAPG	ELOVL4
CAPNS1	ELOVL6
CAR13	EML1
CARD11	EMP1
CASC5	EMX2
CASP8	ENHO
CAT	ENKUR
CBR2	ENTPD1
CBX5	ENTPD2
CBX7	EPB4.1L3
CCDC125	EPDR1
CCDC18	ESRRB
CCDC28B	ETV4
CCDC50	ETV5
CCK	EVI2A
CCL24	F3
CCL3	FABP3
CCL6	FABP5
CCL7	FADS1
CCL8	FADS2
CCNA2	FAM101B
CCNB1	FAM117A
CCNB2	FAM171B
CCNG1	FAM174A
CCNI	FAM181B
CCNY	FAM195A
CCR5	FAM20A
CCR7	FAM49A
CCRL2	FAM69A
CCRN4L	FAM69B
CCT3	FAM69C
CD14	FAM84A
CD164	FBLIM1
CD200R4	FBLN7
CD209A	FBXL22
CD209B	FBXL7
CD209F	FBXO27
CD209G	FBXW17
CD22	FCER1G
CD244	FCGR2B
CD274	FCGR3
CD28	FCRLS
CD300LB	FDPS
CD300LF	FES
CD33	FEZ1
CD34	FEZF2
CD3D	FGFR3
CD44	FGL2
CD48	FHL5
CD5	FHOD1
CD52	FJX1
CD63	FKBP10
CD68	FLNC
CD69	FNDC4
CD72	FOLH1
CD74	FOXG1
CD79B	FOXRED2
CD83	FREM1
CD84	FUT9
CD86	FZD1
CD9	FZD10
CD93	FZD2
CD99	G0S2
CDC42SE2	GABRG1
CDK18	GAL3ST4
CDKN1A	GAP43
CDKN2A	GAPDH
CDS1	GBP9
CEBPD	GCAT
CENPE	GCNT1
CENPF	GCNT2
CEP68	GDA
CFP	GDF1
CGN	GDPD1
CH25H	GFAP
CHAF1B	GGT7
CHCHD10	GGTA1
CHD9	GJB6
CHMP2A	GKN1
CHPT1	GLCE
CHST10	GLI1
CHST11	GLI2
CHST2	GLUL
CHST3	GM13152
CHST7	GM16442
CHST8	GM4907
CHSY1	GM4951
CIB1	GM4987
CISH	GM694
CITED2	GNG13
CITED4	GNG2
CKB	GNG3
CLCN7	GPD1
CLDN11	GPHN
CLDN12	GPR156
CLEC10A	GPR19
CLEC1A	GPR84
CLEC2D	GPRC5B
CLEC4A1	GPT
CLEC4A2	GRAMD1B
CLEC4A3	GRB10
CLEC7A	GRIN2C
CLIC4	GRM3
CLN5	GSDMD
CLN6	GSTM1
CLPTM1	GSTM2
CLTC	GSTM5
CLU	GSTO1
CMAS	GYS1
CMTM3	H3F3B
CMTM6	H6PD
CMTM7	HAPLN1
CNDP2	HAUS4
CNN3	HCLS1
COL27A1	HCRTR1
COL9A2	HCST
COL9A3	HDHD3
COLEC12	HECA
COPA	HEG1
COQ7	HES5
CORO1C	HHATL
COTL1	HIP1
COX17	HIPK1
COX4I1	HMGB2
COX5B	HMGCR
COX6A1	HMGCS1
COX6A2	HNMT
COX6C	HPDL
COX7A2L	HPX
CPD	HRH1
CPEB1	HSD17B7
CPEB4	HSPG2
CPNE3	HTRA1
CPT1A	ICA1
CREB3L2	ICAM1
CREG2	ID4
CREM	IDH1
CRIP1	IDI1
CRLF2	IFI203
CRTAP	IFI204
CRYBA4	IFI27L2A
CRYBB1	IFI35
CS	IFI44
CSF1	IFIT2
CSF1R	IFIT3
CSF2RA	IFITM1
CSF2RB2	IGFBP2
CSMD3	IL18
CSNK1G3	IL1B
CSNK2B	IL3RA
CSPG4	IL4I1
CSRNP1	IMPA2
CST3	INHBB
CST7	INPP5D
CSTB	IQGAP1
CTLA2A	IRF7
CTLA2B	ISG15
CTNNA1	ISG20
CTNND2	ISM1
CTSA	ITGAX
CTSB	ITGB1
CTSD	ITGB7
CTSE	ITIH3
CTSL	KANK4
CTSS	KAZALD1
CTSZ	KCNC4
CX3CR1	KCNJ10
CXCL1	KCNJ16
CXCL10	KCNK1
CXCL14	KCNN2
CXCL16	KCTD12
CXCL2	KIF21B
CXCR4	KIF5A
CYBA	KIRREL2
CYBB	KLHL32
CYFIP2	KY
CYP4F18	LAMC2
CYP4V3	LAP3
CYP51	LCAT
CYSLTR1	LCK
CYTH4	LCP1
CYTIP	LDB2
D10WSU102E	LDHB
D16ERTD472E	LDLR
D330045A20RIK	LFNG
DAB2	LGALS3
DACT1	LGI1
DAP	LGI2
DBP	LHX2
DDHD1	LIMA1
DDIT4	LMO4
DDOST	LMO7
DDX26B	LOX
DDX31	LRRC23
DEGS1	LRRC24
DERA	LRRC4
DGKH	LSP1
DGKZ	LSS
DHCR24	LTB
DHCR7	LUZP2
DHFR	LY6H
DHX32	LY86
DIAP1	LYPD6
DKK2	LYZ1
DNAJB14	LYZ2
DNASE1L1	MAL2
DNASE2A	MALL
DOCK10	MAP3K8
DOCK4	MATN2
DOK3	MBOAT2
DOT1L	MCM5
DPP7	MEGF10
DPY19L3	MERTK
DPYS	MFN1
DSCR3	MGLL
DTL	MID1IP1
DTNBP1	MILL2
DTX3	MKI67
DUOXA1	MLF1
DUSP27	MMD2
DUSP5	MNDA
DUSP7	MRAS
DYNLT3	MS4A4B
DYRK4	MSRB3
E2F1	MT1
E430025E21RIK	MT2
EAF1	MTHFD1
ECHS1	MTHFD2
ECSCR	MUM1L1
EEA1	MVD
EEF1A1	MVK
EEF1B2	MX2
EEF2	MYCN
EEF2K	MYLIP
EEPD1	MYO1H
EFEMP2	MYOM3
EFNA5	NAA15
EFNB1	NAIP2
EFR3B	NAP1L1
EGLN3	NAT8
EGR2	NAT8B
EHD1	NCAM1
EID1	NCF4
EIF1A	NDP
EIF2S1	NDRG2
EIF2S3X	NES
EIF3F	NEURL2
EIF4B	NGEF
EIF4EBP1	NGFR
EIF6	NHLRC1
ELL2	NINJ2
ELMO1	NKAIN4
ELOVL5	NLGN1
ELOVL7	NOV
EML2	NPAS4
EMR1	NR1D1
ENG	NR2E1
ENO1	NR2F1
ENPP1	NRCAM
ENTPD1	NRSN1
EPHA2	NRXN1
EPHX1	NSG2
EPN2	NT5DC3
EPRS	NTN1
EPS8	NTSR2
ERCC6	NUDT10
ERGIC3	NWD1
ERO1L	NXPH3
ETL4	OAS1C
ETS1	OAS1F
ETS2	OAS2
ETV4	OASL1
ETV5	OLFM1
EVI2A	OLFML3
EXOSC2	OLIG1
EYA4	OLIG2
F13A1	OMG
F2R	OSBPL10
F3	OSGIN2
FABP3	OSMR
FABP5	OSTF1
FAM102B	OTUD7A
FAM105A	PAFAH1B3
FAM129B	PAQR7
FAM132A	PAQR8
FAM162A	PARP9
FAM20C	PAWR
FAM72A	PBK
FASTKD3	PBX3
FBLIM1	PCDH20
FBXL16	PCDHB10
FBXO33	PCYT2
FBXW11	PDE1B
FCGR1	PDGFD
FCGR4	PDK2
FCHSD2	PDK4
FDPS	PEX11A
FDXR	PFKM
FEM1B	PFN2
FEZ2	PGM2
FGD2	PGP
FGF1	PGRMC1
FGF13	PHACTR3
FGL2	PHF11
FGR	PHGDH
FKBP1A	PHLPP1
FKBP1B	PI15
FKBP9	PIGS
FLCN	PIK3IP1
FLNA	PLA1A
FLT1	PLCB4
FMN1	PLCD1
FN1	PLCD4
FNDC3A	PLEKHO2
FNDC3B	PLS3
FNDC4	PLSCR1
FNIP1	PLXND1
FNIP2	PMEPA1
FOSL2	PMM1
FOXN2	PNPLA7
FRMD4A	POR
FRMD4B	PPAP2B
FTH1	PPAP2C
FUCA1	PPAPDC3
FUCA2	PPARA
FUNDC2	PPIL6
FXYD5	PPP1R12A
FXYD6	PPP1R3D
FYN	PPP1R3G
FZD5	PQLC3
G6PC3	PRC1
G6PD2	PRKCSH
G6PDX	PRKD1
GAA	PRNP
GAB1	PRODH
GABBR1	PRR5
GADD45A	PRX
GAL3ST4	PTGS1
GALC	PTGS2
GALK2	PTPLAD1
GALNT6	PTPLB
GALNT7	PTPN13
GAPDH	PTPN18
GARNL3	PTPN6
GAS2L3	PXMP2
GAS7	RAB19
GATAD1	RAB33A
GATM	RAB3IL1
GBA	RAB9
GCA	RAC2
GCH1	RALGDS
GCN1L1	RANBP3L
GCNT1	RAPGEF3
GCNT2	RASA3
GDF15	RASAL2
GDF9	RASD2
GEM	RASGEF1A
GFM2	RAVER2
GGA2	RDH11
GGCT	RECK
GGH	REEP1
GGT5	RELL1
GGTA1	REPIN1
GHITM	RET
GHR	RGS1
GIMAP1	RGS10
GIMAP6	RGS17
GJB6	RGS7
GKN1	RHBDF2
GLA	RIMKLA
GLB1	RIPPLY3
GLIPR1	RND1
GLRX	RNF182
GLT25D1	ROCK1
GLUL	RPE65
GM11545	RPL12
GM1673	RPL13
GM2A	RPL13A
GMFB	RPL26L1
GNA15	RPL35A
GNAI3	RPL36A
GNB2L1	RPL5
GNG12	RPLP1
GNPTAB	RPS12
GOLM1	RPS18
GOLPH3	RPS20
GOLT1B	RPS24
GOT1	RPS3A
GP49A	RPS4X
GP9	RPS4Y2
GPD1	RRAS
GPD2	RSAD2
GPHA2	SALL1
GPI1	SAP30
GPNMB	SBK1
GPR132	SC5D
GPR137B	SCARA3
GPR162	SCD2
GPR183	SCG3
GPR56	SCO2
GPR65	SDC4
GPR84	SDF2
GPRASP2	SDR39U1
GPX3	SEC14L2
GPX4	SEMA3B
GRAMD1A	SEMA4A
GRAMD1B	SEMA4B
GRAMD3	SEMA4D
GRAP	SERP2
GRASP	SERPINA3N
GRHL1	SESTD1
GRIFIN	SH3BGRL3
GRN	SHISA4
GRRP1	SKAP1
GSN	SKIL
GSTM5	SLAIN2
GSTO1	SLC13A5
GTF2H1	SLC15A2
GTF2H2	SLC19A2
GTF3C4	SLC1A3
GUSB	SLC22A17
GVIN1	SLC25A18
GYG	SLC25A24
GYK	SLC25A29
H1F0	SLC25A33
H2-AA	SLC26A6
H2-AB1	SLC29A4
H2-D1	SLC35E4
H2-K1	SLC38A3
H2-M3	SLC39A12
H2-Q2	SLC41A1
H2-Q6	SLC43A2
H2-Q7	SLC46A1
H2-T10	SLC4A4
H2AFX	SLC7A10
HAAO	SLC9A3R1
HBEGF	SLCO4A1
HCCS	SLFN2
HCK	SLFN3
HCST	SLFN5
HDAC9	SLITRK5
HECTD2	SLMAP
HELZ	SMAD6
HES1	SMOX
HEXA	SMPD1
HEY1	SMPDL3A
HGF	SNAI2
HIF1A	SORBS2
HIGD1A	SOX1
HIGD2A	SOX8
HIST1H1C	SOX9
HIST1H1D	SPAG5
HIST1H1E	SPAG9
HIST2H2AA1	SPATA13
HIVEP2	SPC25
HLF	SPEF2
HMGCS1	SPHK1
HMGN3	SPP1
HMHA1	SPRY2
HMMR	SQLE
HPS3	ST6GALNAC5
HPSE	ST8SIA5
HSD17B12	ST8SIA6
HSPA12A	STAMBPL1
HSPA1A	STMN3
HSPA9	SULF1
HSPD1	SULF2
HTATIP2	SYN2
HTRA1	SYNPO2
HTRA3	SYT5
I830077J02RIK	TBC1D10A
IARS2	TCF15
ID3	TEAD2
IDH1	TEF
IDH2	TGFB1
IDI1	TGFBI
IER2	THBS1
IER3	THRSP
IER5L	THSD7A
IFI204	TIFA
IFI205	TIMP4
IFI27L2A	TIPARP
IFI30	TKT
IFIT2	TLCD1
IFIT3	TLR12
IFITM2	TLR2
IFITM3	TM6SF1
IFNG	TM7SF2
IFNGR1	TMEM129
IGF1	TMEM130
IGF2R	TMEM132A
IGFBP5	TMEM229A
IGFBP6	TMEM25
IGSF6	TMEM35
IL10RA	TMEM38B
IL12B	TMEM55A
IL12RB2	TMEM56
IL16	TMEM59L
IL18BP	TMTC4
IL1A	TNF
IL1B	TNFAIP3
IL1R1	TOM1L1
IL1RN	TOX
IL23A	TPD52
IL2RG	TPRKB
IL3RA	TRAF4
IL4I1	TRAK2
IL6RA	TREM2
IL7R	TRF
IMPACT	TRIM34
IMPDH1	TRNP1
INF2	TSC22D3
INPP5D	TSNAX
IQGAP1	TSPAN2
IQGAP3	TSPAN7
IRAK3	TTC9B
IRF4	TTYH3
IRF7	TUBB2A
IRG1	TUBB2B
IRGM2	TYROBP
ISG15	UBASH3B
ISOC1	UBIAD1
ITGA4	UCHL1
ITGA5	UCK2
ITGA9	UQCRFS1
ITGAL	USP18
ITGAX	USP51
ITGB1	VEGFA
ITGB1BP1	VHL
ITGB2	VIM
ITM2B	WDR16
ITM2C	WISP1
ITPKB	WNT7A
ITPRIP	WNT7B
IVNS1ABP	WSCD2
JAG1	XAF1
JMJD6	YWHAH
JOSD1	ZC3HAV1
JUN	ZFP36L2
KCNJ2	ZFP428
KCNK12	ZFP661
KCNK6	ZFP710
KCTD6
KHDRBS3
KIF11
KIF14
KIF15
KIF1A
KIF5B
KLF10
KLF2
KLF3
KLF7
KLHL6
KLK8
KLRB1A
KLRB1B
KRR1
KYNU
L7RN6
LAG3
LAMC1
LAMP1
LAMP2
LANCL2
LAP3
LCK
LDHA
LDHB
LDLR
LDLRAD3
LEFTY1
LEPREL1
LEPREL2
LEPROT
LEPROTL1
LFNG
LGALS1
LGALS3
LGALS3BP
LGI2
LGMN
LHFPL2
LIFR
LILRB3
LILRB4
LIN54
LIPA
LITAF
LMBRD2
LMNA
LMNB1
LONRF3
LOX
LPL
LRBA
LRFN4
LRP12
LRPAP1
LRRC14B
LRRC3
LRRC58
LRRC59
LRRFIP1
LST1
LTC4S
LUZP1
LY6G6E
LY9
LYL1
LYPLAL1
LYST
LYZ
LYZ1
LYZ2
LYZL4
M6PR
MAF
MAFF
MAGED1
MALAT1
MALT1
MAMDC2
MAML1
MAN1C1
MAN2A1
MAN2B2
MANBA
MANSC1
MAP2K3
MAPK3
MAPKAPK2
MAPKAPK3
MARCH8
MARCKS
MARCKSL1
MAX
MBD2
MBOAT1
MCM3
MCOLN2
MDFIC
MED11
MED8
MEGF9
MEOX1
METRNL
METTL3
MEX3C
MFNG
MGAT4A
MIB1
MICAL2
MIF
MIPOL1
MKNK2
MLXIPL
MMD
MMP12
MNDA
MOCOS
MOSPD2
MPEG1
MPI
MPP1
MR1
MRAS
MRC1
MRGPRE
MRPL13
MRPS18A
MRPS2
MRPS21
MS4A4A
MS4A4B
MS4A6C
MS4A6D
MS4A7
MSN
MT1
MT2
MTHFD2
MTMR11
MTPN
MTSS1
MTUS1
MVD
MVP
MX1
MYC
MYL6
MYO10
MYO1E
MYO5A
NAB1
NAB2
NAGLU
NAP1L1
NAT6
NAT8L
NAV1
NAV3
NBEAL2
NBL1
NCAPG2
NCAPH
NCEH1
NDRG4
NDST1
NDUFA1
NDUFA12
NEIL2
NEIL3
NEK7
NENF
NES
NEURL1A
NEXN
NFAM1
NFIL3
NFKB2
NFKBIE
NGEF
NID2
NLRC3
NLRP3
NMB
NME1
NOD2
NPC2
NPL
NPNT
NR1D1
NR4A2
NR4A3
NRBF2
NRIP1
NRM
NRP1
NRP2
NRSN1
NSF
NSMCE2
NTN3
NUCKS1
NUDT19
NUDT4
NUF2
NUMB
NUP88
OAS1A
OAS1F
OAS1G
OASL1
OASL2
ODC1
OGDH
OLA1
OLFR110
OLFR111
OLFR128
OLR1
OS9
OSBPL3
OSBPL8
OSGIN1
OSM
OSTM1
OTUD1
OXCT1
P2RX4
P2RY12
P2RY13
P2RY2
P4HB
PACSIN1
PADI3
PAF1
PAICS
PAPOLG
PBXIP1
PCDHB22
PDCD1
PDCD6
PDCD6IP
PDE2A
PDE4B
PDGFA
PDGFC
PDK3
PDLIM4
PDXK
PEA15A
PEBP1
PELI2
PELO
PER3
PERP
PF4
PFKL
PFN1
PFN2
PGAM1
PGK1
PGM2
PHF11
PHGDH
PHLDA1
PHLDA3
PHLDB1
PHYHD1
PID1
PIGA
PIGS
PIK3R1
PIM3
PITPNA
PITRM1
PKIB
PKP2
PLAU
PLAUR
PLBD2
PLCL2
PLD1
PLD3
PLD4
PLEK
PLEKHA1
PLEKHB2
PLEKHH1
PLEKHM2
PLEKHO1
PLIN2
PLK2
PLP2
PLXNA2
PLXNA4
PLXNC1
PMAIP1
PMEPA1
PMVK
PNP
PNPLA7
PON3
POT1B
PPAP2A
PPFIBP1
PPIB
PPM1A
PPM1F
PPM1J
PPP1R3C
PPP1R3F
PPP3R1
PPT1
PQLC1
PQLC3
PRC1
PRCP
PRDM1
PRDX3
PRDX4
PRDX5
PRDX6
PRELID2
PRICKLE1
PRKAB1
PRKAR1A
PRKCA
PRKG1
PRKX
PRL2C1
PRNP
PROCR
PROX2
PRR11
PRR15
PRR18
PRR5L
PSAT1
PSEN2
PSMB6
PSMD10
PSMD2
PSME1
PTCHD1
PTGER4
PTGS1
PTGS2
PTPLAD2
PTPLB
PVR
PWP2
PXDN
PYGL
QPCT
QPCTL
QPRT
RAB20
RAB34
RAB39
RAB3IL1
RAB7
RACGAP1
RAI14
RALGPS2
RAMP1
RAMP3
RANBP2
RAP2A
RAP2B
RAPGEF5
RASD2
RASGEF1A
RASGRP4
RASSF1
RASSF3
RBM5
RCE1
REEP3
RELB
RELL1
REPS2
RFTN1
RFTN2
RFX5
RGS1
RGS10
RGS11
RGS14
RGS16
RHOB
RHOBTB1
RHOC
RHOF
RLF
RNASEH2B
RNF128
RNF149
RNF31
RNPC3
ROPN1L
RORA
RPL15
RPL22
RPL23
RPL31
RPL32
RPL36A
RPL36AL
RPL37A
RPL6
RPL8
RPS10
RPS11
RPS14
RPS15
RPS25
RPS26
RPS3
RPS5
RPS6KA1
RPS9
RPSA
RRAD
RRAGC
RRM2
RSAD2
RSBN1
RSPO1
RTN1
RTP4
RUNX3
RUSC2
RXRG
S100A1
SALL1
SAMD4B
SAMD8
SAMD9L
SAP30
SASH1
SASH3
SCAMP2
SCAMP5
SCARB1
SCD2
SCPEP1
SCRT1
SDC3
SDC4
SDCBP
SDF2L1
SDF4
SELM
SELPLG
SEMA4B
SEPHS1
SEPP1
SEPT11
SEPT4
SERF1
SERINC1
SERINC3
SERPINB6A
SERPINB6B
SERPINB6C
SERPINB9
SERPINE1
SERPINE2
SERPINF1
SESN1
SESTD1
SETBP1
SGCB
SGMS1
SGSH
SH3BGRL
SH3PXD2B
SH3YL1
SHE
SIAE
SIGLEC1
SIGLEC5
SIGLECH
SIK1
SIL1
SIPA1
SIVA1
SKAP1
SLA
SLC13A3
SLC15A3
SLC16A3
SLC1A3
SLC1A5
SLC23A2
SLC25A13
SLC25A19
SLC25A25
SLC25A27
SLC25A37
SLC25A4
SLC26A11
SLC27A1
SLC2A1
SLC2A3
SLC2A5
SLC2A6
SLC30A1
SLC31A1
SLC35A4
SLC35E4
SLC36A2
SLC36A4
SLC39A12
SLC40A1
SLC43A3
SLC44A1
SLC45A4
SLC46A1
SLC5A10
SLC6A6
SLC7A1
SLC7A11
SLCO2B1
SLCO4A1
SLFN2
SMARCA5
SMC4
SMPDL3A
SMYD2
SNAP29
SNHG6
SNN
SNORA74A
SNPH
SNRPD2
SNTA1
SNTB2
SNX3
SOAT1
SOCS4
SOCS6
SOD1
SOD2
SOX4
SOX7
SPARC
SPEG
SPG21
SPP1
SQLE
SQRDL
SREBF2
SRGAP2
SRGN
SRI
SRPK2
SRXN1
SSH2
SSR3
SSR4
ST14
ST3GAL5
ST3GAL6
ST8SIA1
ST8SIA4
ST8SIA6
STAB1
STAMBPL1
STARD3
STARD4
STARD8
STIL
STK3
STK4
STT3B
STX11
STX3
SULF2
SULT1A1
SUMO1
SURF4
SYNE2
SYNGR1
TANC2
TBC1D12
TBC1D16
TBC1D4
TCAP
TCF4
TCP1
TECPR1
TEF
TES
TGFBI
TGFBR1
TGFBR2
TGM2
TGOLN1
THBS1
TIGD4
TIMM8A1
TIMP2
TIPARP
TJP1
TLE3
TLK1
TLN1
TLR1
TLR2
TLR5
TM6SF1
TMBIM1
TMCO4
TMED10
TMED3
TMEM119
TMEM123
TMEM163
TMEM164
TMEM170B
TMEM173
TMEM178
TMEM184B
TMEM202
TMEM204
TMEM205
TMEM37
TMEM39A
TMEM44
TMEM51
TMEM52
TMEM63A
TMEM65
TMEM66
TMEM86A
TMSB4X
TNFAIP2
TNFAIP8
TNFAIP8L1
TNFSF8
TNFSF9
TNIP2
TNS3
TOLLIP
TOMM70A
TOP2A
TPCN2
TPD52
TPI1
TPM4
TPPP
TPST2
TRAF5
TREM2
TRF
TRIB3
TRIM62
TRMT5
TRPC4
TRPM1
TRPM6
TRPS1
TSC22D1
TSC22D3
TSPAN13
TSPAN14
TSPAN17
TSPAN18
TSPO
TTC3
TTC7
TTYH2
TUBA1A
TUBB5
TUSC1
TXNDC16
TXNDC5
TXNIP
TXNRD1
TYROBP
UAP1
UAP1L1
UBC
UBE2L3
UCK2
UNC13B
UNC5A
UNC93B1
UPK1A
UPK1B
UQCRFS1
USE1
USP12
USP18
USP2
USP21
USP30
USP9X
VAMP1
VAMP3
VAT1
VDAC2
VEGFA
VIM
VKORC1
VPRBP
VPS13C
VPS18
VPS26A
VPS29
VPS35
VPS37B
VSIG8
WASF2
WBP5
WDFY2
WEE1
WIF1
WIPF1
WIPF3
WSB2
XPR1
XYLT1
YBX1
YDJC
YIPF7
YWHAG
ZBP1
ZBTB16
ZDHHC21
ZFAND2A
ZFHX3
ZFP358
ZFP365
ZFP367
ZFP36L2
ZFP408
ZFP503
ZFP618
ZFP704
ZFP710
ZFP740
ZFP90
ZFP91
ZMAT3
ZMYND15
ZSCAN2
ZWILCH

## Sheet: RFC of inflammatory genes
Figure 1 -Source Data 3. Relative fold change of microglia- and astrocyte- related genes (249 genes). See Figure 1.
Symbol	3W Cb	5W Cb	3W Hp	5W Hp
Cst7	1.61	19.1	1.17	1.24
Ccl3	2.28	9.19	1.32	1.49
Serpina3n	1.84	9.02	-1.24	-1.22
Fcrls	2.05	8.23	-1.09	1.01
Tyrobp	1.76	6.6	-1.01	1.03
Lyz2	1.61	6.08	1.22	1.5
Spp1	1.4	6.08	1.5	1.48
Ly86	1.86	5.73	1.04	-1.02
Cd68	1.82	5.42	1.1	1.15
Cd52	1.36	5.14	1.12	1.1
Cox6a2	4.8	4.77	2.42	3.24
Gpnmb	1.12	4.59	-1.06	1.19
C3ar1	1.47	4.57	1.24	1.41
Fcer1g	1.44	4.42	-1.04	-1
Itgax	1.04	4.3	1.03	1.04
Gfap	1.55	4.12	1.07	1.35
Ctss	1.5	4.02	-1.01	-1.03
Mpeg1	1.78	3.99	1.04	1.05
Clec7a	1.19	3.9	1.1	1.13
Ccl6	1.36	3.89	1.14	1.07
Mthfd2	5.67	3.86	3.69	4.56
C4b	1.41	3.31	1.3	1.72
Lgals3bp	1.54	3.29	1.13	1.84
Ifit3	1.71	3.27	1.53	1.96
Emr1	1.33	3.2	-1.02	1.02
Slc7a11	2.43	3.18	1.17	1.74
Fcgr3	1.16	3.18	-1.11	-1
Gdf15	4.55	3.14	1.55	1.1
Cxcl10	1.17	3.13	1.28	1.45
Fcgr2b	1.36	3.04	-1.03	1.07
Cd74	1.24	2.99	1.14	1.32
Slc7a1	3.39	2.96	2.09	2.42
Cdkn1a	1.96	2.88	2.01	1.87
Oasl2	1.36	2.85	1.17	1.73
Olfml3	1.37	2.78	1	1.07
Aldh1l2	5.49	2.76	3.79	2.81
Pld4	1.38	2.68	-1.03	1
Slc43a3	1.56	2.68	1.03	1.45
Cd84	1.11	2.64	1.02	1.03
Atp6v0d2	-1.01	2.62	-1.04	-1.02
Csf1r	1.26	2.6	-1.08	-1.07
Olfr111	1.16	2.57	1.01	1.07
Cx3cr1	1.39	2.57	-1.03	1.03
Trem2	1.19	2.47	1	1.08
H2-Aa	1.12	2.47	1.09	1.35
Mamdc2	1.11	2.45	1.08	1.23
Syt5	1.55	2.44	-1.03	1.05
AI607873	1.11	2.41	1.06	1.07
Cd93	2.23	2.37	1.47	1.49
Ifitm3	1.45	2.35	1.24	2.01
Rtp4	1.22	2.35	1.21	1.74
Cd34	1.73	2.34	1.1	-1.01
H2-K1	1.13	2.33	1.01	1.39
Cd24a	1.39	2.33	-1.1	-1.08
Asns	2.93	2.31	1.88	2.04
Cd33	1.36	2.31	1.08	-1.06
Cth	1.86	2.31	1.1	1.15
Ctsz	1.23	2.27	1.04	1.31
Timp2	1.36	2.25	-1.09	1.13
Nrp1	1.53	2.24	-1.2	-1.17
Aldh18a1	2.66	2.21	1.91	2.23
Unc93b1	1.26	2.21	1.03	1.05
Eif4ebp1	3.14	2.2	2.13	2.25
Ctsd	1.26	2.18	1.01	1.15
Cyba	1.39	2.17	1.15	1.17
Tgfbr1	1.14	2.13	1	-1.07
Il2rg	1.66	2.12	1.46	1.41
Lag3	1.12	2.1	1.05	1.15
Apoc1	-1.03	2.08	-1.07	1.16
Osmr	1.31	2.07	1.17	1.14
Cd63	1.16	2.06	1.1	1.38
Psat1	1.86	2.06	1.3	1.51
Igf1	1.18	2.05	-1.01	-1.17
Phgdh	1.74	2.04	1.18	1.54
Casp8	1.33	2.04	1.07	1.28
Entpd1	1.27	2.03	-1.11	1.02
Inpp5d	1.12	2.03	-1.08	1.01
Irgm2	1.3	2.03	1.05	1.48
Lpl	1.2	2.01	-1.17	-1.09
Ifit2	1.2	2	-1	1.04
Slc40a1	2.04	2	1.46	1.2
Plau	1.17	1.98	1.04	1.08
Mal2	1.31	1.97	-1.02	1.02
P2ry13	1.19	1.96	-1.17	-1.11
Usp18	1.19	1.96	1.23	1.58
Hexa	1.09	1.95	-1.02	1.04
Ms4a6c	1.01	1.95	-1.09	1.17
Txnip	-1.08	1.94	1.06	1.59
Cyth4	1.14	1.94	-1.05	-1.06
Cd9	1.15	1.94	-1.02	1.15
Kcnj2	1.3	1.94	-1.27	-1.14
Id3	1.3	1.94	-1.05	1.13
Plek	1.11	1.93	1.02	1.02
Abca1	1.7	1.92	1.34	1.5
Gpx3	1.7	1.9	1.09	1.09
Isoc1	1.54	1.88	1.04	1.19
Hspa9	1.88	1.88	1.33	1.53
Slfn5	1.52	1.88	1.2	1.19
Leprotl1	1.94	1.87	1.32	1.55
Acsl5	1.49	1.84	-1.18	-1.09
Gpr84	1.17	1.84	1.11	1.03
Nov	1.15	1.82	-1.22	-1.18
Clic4	1.81	1.82	1.29	1.3
Atp13a5	1.43	1.82	1.22	1.2
Nbl1	1.29	1.81	-1.02	-1.07
Lcp1	1.34	1.8	1.04	1.05
Cd72	1.1	1.79	-1.01	1.05
Cd86	1.12	1.79	1.01	1.07
Serpinf1	1.48	1.78	1.2	1.35
Vegfa	2.17	1.78	1.56	1.48
Fxyd5	1.24	1.77	1.01	1.27
Nsg2	1.52	1.77	-1.1	-1.03
Srgn	1.49	1.76	1.35	1.32
Itpkb	1.18	1.76	1.12	1.08
Dab2	1.41	1.76	1.01	1.69
BC028528	1.53	1.76	1.2	1.25
Npl	1.03	1.75	1	-1.08
Scpep1	1.44	1.74	1.15	1.53
Vat1	1.28	1.74	-1.01	1.14
B2m	1.21	1.74	1.1	1.17
Xaf1	1.06	1.73	1.09	1.37
Grn	1.15	1.73	1.07	1.08
Myc	1.11	1.73	1.01	-1
Lilrb4	1.11	1.73	-1.01	1.07
Serpine2	1.18	1.72	-1.04	-1.06
Nfil3	1.71	1.72	1.18	1.29
H2-Ab1	1.12	1.72	-1.05	1.21
Trib3	2.21	1.72	1.27	1.24
Adap2	1.2	1.71	-1.01	-1.02
Gsto1	1.36	1.71	1.03	1.08
Slc39a12	1.05	1.71	-1	1.11
Eprs	1.78	1.69	1.38	1.47
Hist1h1c	1.3	1.68	-1.02	1.29
Soat1	1.19	1.68	-1.04	1.03
Rgs10	1.17	1.68	-1.01	-1.16
AF529169	1.62	1.67	1.3	1.07
Gpr137b	1.35	1.66	1.22	1.31
Dhrs7	1.62	1.65	1.28	1.57
Slco2b1	1.28	1.65	1.03	1.07
Plp2	1.25	1.65	1.13	1.36
Lmo4	1.59	1.65	-1.08	-1.06
Ifi44	1.04	1.65	1.06	1.39
Csf1	1.19	1.65	1.11	1.1
Nudt10	1.35	1.64	1	-1.01
Ldb2	1.53	1.64	-1.09	1.05
Thbs1	1.46	1.64	1.21	1.27
Selplg	1.01	1.64	-1.24	-1.11
Phyhd1	1.3	1.64	1.11	1.22
Evi2a	1.18	1.63	1.1	1.17
Capg	1.23	1.63	1.04	1.22
Camkv	1.34	1.62	-1.12	-1.03
Gvin1	-1.03	1.61	-1.02	1.16
Prcp	1.3	1.61	1.14	1.05
Pqlc3	1.27	1.61	1.08	1.38
Gca	1.42	1.61	-1.08	1.1
Itgb2	1.11	1.61	1.05	-1
Ctla2a	1.67	1.6	1.17	1.08
St8sia6	1.12	1.59	-1.09	-1.17
Sulf1	1.3	1.59	-1.11	1.7
Klhl6	1.24	1.59	1.01	-1.08
Kcnk6	1.3	1.58	-1.07	-1
Clec2d	1.02	1.58	1.14	1.21
Tprkb	1.14	1.58	1.22	1.08
Odc1	1.28	1.57	1.04	1.21
Rxrg	1.19	1.57	-1.18	1.18
Gusb	1.17	1.57	1.04	1.06
Apoe	1.04	1.56	-1.04	1.02
Bmp2k	1.23	1.56	1.17	1.19
Ctxn1	1.31	1.56	-1.11	-1.2
Tanc2	1.31	1.56	-1.02	1
Stab1	1.25	1.55	-1.01	1.04
Pex11a	1.24	1.54	-1.08	1.13
Tgfbr2	1.16	1.54	1.06	1.17
Pxdn	1.32	1.54	-1.09	-1.06
5430435G22Rik	1.14	1.54	-1.02	1.1
Anxa4	1.14	1.53	1.05	1.15
Axl	1.11	1.53	1.02	1
Pid1	1.19	1.53	-1.05	1.01
Glce	1.37	1.53	1.42	1.15
Irf7	1.09	1.53	1.08	1.1
St6galnac5	1.29	1.52	-1.14	-1.2
Lipa	1.09	1.52	1.01	1.15
Frmd4b	1.19	1.52	-1.04	1.06
Gpr56	1.14	1.52	-1.13	1
Tgfb1	1.2	1.51	1.05	1.04
Qpct	1.19	1.51	-1.08	1.01
Cxcl16	1.07	1.51	1.1	1.16
Serpinb9	1.18	1.51	1.01	1.15
Pon3	1.25	1.51	-1.02	1.46
Lap3	1.28	1.51	1.07	1.03
P2ry12	1.25	1.51	-1.08	-1.06
Pnp	1.11	1.51	-1.01	1.15
Lgi2	1.2	1.51	1.32	1.24
Slc25a18	1.06	1.51	-1.19	-1.13
Isg20	1.54	1.5	1.5	1.31
Phlda3	1.07	1.5	-1.04	1.18
Ifi30	1.35	1.5	1.13	1.32
Nr4a3	2.37	1.47	-1.06	-1
Etv5	1.75	1.46	1.03	1.1
Fn1	1.51	1.39	1.18	1.22
Npas4	2.01	1.37	1.27	1.26
Atf5	1.93	1.36	1.29	1.35
Fosl2	1.67	1.36	-1.09	1
Nr4a2	2.6	1.34	1.1	1.06
Art3	1.51	1.32	1.1	1.09
Prr15	1.84	1.29	1.27	-1.03
