# Supplementary material for: Activation of GCN2 kinase by ribosome stalling links translation elongation with translation initiation
Source: eLife. 2016 Apr 16;5:e14295. doi: 10.7554/eLife.14295 (PMC4917338; doi:10.7554/eLife.14295)
Supplement: Figure 2—source data 1. — DOI: http://dx.doi.org/10.7554/eLife.14295.012 [file elife-14295-fig2-data1.xlsx]

## Sheet: Overlap genes with ChIP-seq
Figure 2 -Source Data 1. ATF4 target genes in B6J-nmf205-/- differentially expressed genes. See Figure 2.
Significantly changed genes (1016 genes)	ChIP-seq ATF4 targets (472 genes)	Overlap genes (99 genes)
1110012J17Rik	1110018J18Rik	2700007P21Rik
1110032A04Rik	1300001I01Rik	Aars
1700003M02Rik	1700016K19Rik	Abcb1a
1700007K13Rik	1810031K17Rik	Acot2
1700028P14Rik	2310008H04Rik	Adm2
1700048O20Rik	2610528E23Rik	Akna
1700086D15Rik	2700007P21Rik	Aldh18a1
1810010H24Rik	2810006K23Rik	Aldh1l2
2310014L17Rik	2810408A11Rik	Apobec1
2700007P21Rik	2900073G15Rik	Arhgef2
2900055J20Rik	3110049J23Rik	Asns
2900092E17Rik	4921524J17Rik	Atf3
3110082D06Rik	4931414P19Rik	Atf5
4632428N05Rik	4933421E11Rik	Atxn2l
4930467E23Rik	5930403L14Rik	Bdnf
4930486G11Rik	6330503K22Rik	Calcrl
4930555G01Rik	9130023H24Rik	Cars
4930578G10Rik	A630007B06Rik	Cd74
4931406H21Rik	A630033E08Rik	Cebpg
4933415A04Rik	Aars	Chac1
5430435G22Rik	Abcb1a	Clic4
6330403K07Rik	Abcc4	Cp
6330527O06Rik	Acaa1a	Cth
6430571L13Rik	Acaca	Cxadr
6430573F11Rik	Acad8	Cyb5r1
6530402D11Rik	Acot2	Ddit3
9030425E11Rik	Acox2	Ddr2
9330155M09Rik	Adm2	Dhrs7
9830001H06Rik	Aff1	Dleu7
9930111J21Rik2	Agap1	Eif2s2
A230006K03Rik	Akap2	Eif3c
A2bp1	Akna	Eif4ebp1
A3galt2	Aldh18a1	Eprs
A730017C20Rik	Aldh1l2	Etf1
A830018L16Rik	Alkbh5	Fam129a
A930018M24Rik	Amacr	Fcer1g
Aars	Anapc1	Fibin
Abca1	Angptl4	Gars
Abca7	Angptl6	Gm129
Abca8b	Ank2	Gng5
Abcb1a	Ankrd1	Gpt2
Abcc12	Ankrd11	Gsto1
Abcc8	Anp32b	Gtpbp2
Abcg2	Apbb2	Hax1
Abhd4	Apobec1	Herpud1
Ablim1	Arhgef2	Hmox1
Acot2	Arid5b	Iars
Acpl2	Arpc5l	Ifi44
Acsl5	Ascc2	Kcnt2
Adam11	Asns	Lars
Adamts10	Atf3	Leprotl1
Adamts18	Atf5	Lmo4
Adap2	Atf6	Lonp1
Adcy1	Atl2	Mars
Adh1	Atp6v1g1	Mthfd1l
Adm2	Atxn2l	Mthfd2
Adrbk2	B230120H23Rik	Nars
AF529169	B230217C12Rik	Nupr1
Agap2	B230315N10Rik	Osmr
Agt	B4galnt2	Otub2
Agxt2l1	B9d2	Paqr3
AI118078	BB014433	Per2
AI428936	BC019943	Phf10
AI451617	BC055111	Phgdh
AI504432	Bcar1	Phyhd1
AI607873	Bcat1	Ppp2r5a
Aifm3	Bcat2	Psat1
Airn	Bcmo1	Pycr1
Ak3l1	Bdnf	Rcc2
Ak7	Bhlhe22	Reln
Akna	Bnip1	Rps6ka2
Akr1c18	Bola1	Sars
Aldh18a1	Btf3l4	Scpep1
Aldh1l2	C130039O16Rik	Serpinb9
Alms1	Cabp1	Serpinf1
Als2	Calcrl	Sesn2
Amy1	Camsap1	Shmt2
Ang	Cars	Slc16a14
Ankrd34a	Casc5	Slc1a4
Ankrd56	Casp4	Slc3a2
Ano3	Cast	Slc6a9
Anxa3	Ccl2	Slc7a1
Anxa4	Ccl7	Slc7a11
Apcdd1	Cct8l1	Slc7a5
Aplnr	Cd276	Slc9a9
Apobec1	Cd74	Slit1
Apoc1	Cdh24	Soat2
Apoe	Cdsn	Stard5
Appl2	Cebpg	Stc2
Aqp4	Chac1	Tars
Aqp6	Clcn3	Tgif1
Arhgap10	Clic4	Tor3a
Arhgap29	Cln5	Trem3
Arhgdib	Cnot1	Trib3
Arhgef2	Cnpy2	Trim66
Arhgef3	Coasy	Usp36
Arpc1b	Col18a1	Wars
Art3	Cp	Xpot
Asns	Cr1l	Yars
Aspn	Crispld2
Ass1	Crls1
Atf3	Crybg3
Atf4	Cth
Atf5	Cul2
Atp13a5	Cxadr
Atp2b3	Cxcl3
Atp2b4	Cyb5r1
Atp6v0d2	Cyp2ab1
Atxn2l	D4Bwg0951e
AW112010	Daam1
AW551984	Ddc
Axl	Ddit3
AY512949	Ddit4
B2m	Ddr2
B930041F14Rik	Deb1
Barhl2	Defb43
Basp1	Degs2
Bat5	Dhrs7
BC028528	Dhx57
Bche	Dleu7
Bcl6b	Dnaic2
Bclp2	Dnaja3
Bdnf	Dnajb12
Bend6	Dpf2
Bgn	Dpysl2
Bhlhe41	Dtnbp1
Blnk	Dusp6
Bmp1	Dut
Bmp2k	Dysf
Boc	Echs1
Btg1	Edem3
C130030K03Rik	Eif1
C1qa	Eif2s2
C1qb	Eif3c
C1qc	Eif4ebp1
C230004F18Rik	Eif4g2
C230081A13Rik	Eif5
C3ar1	Emilin1
C4b	Eprs
C530030P08Rik	Erlin1
Cabp2	Ero1l
Cachd1	Etf1
Cacna1c	Ets1
Cacna1e	F3
Cacng3	Fads3
Cadps2	Fam119a
Calcrl	Fam129a
Caln1	Fam159a
Camk4	Fam175a
Camkk2	Fam175b
Camkv	Fam188b
Capg	Fam26f
Capsl	Fam83f
Car10	Fam96a
Car15	Fbxl2
Car4	Fbxo11
Car5b	Fbxo31
Car9	Fcer1g
Cars	Fgf21
Casp12	Fibin
Casp8	Flad1
Cav1	Flnc
Cbln1	Flrt1
Cbln2	Fndc7
Ccdc11	Gars
Ccdc120	Gcfc1
Ccdc141	Ghitm
Ccdc3	Gm129
Ccdc63	Gm5627
Ccdc74a	Gm5820
Ccl21a	Gm867
Ccl3	Gng5
Ccl6	Gnpnat1
Ccl9	Golim4
Ccng2	Got1
Ccnjl	Gpam
Cd180	Gpatch3
Cd24a	Gpr85
Cd33	Gpt2
Cd34	Gpx4
Cd37	Grb10
Cd38	Gsk3a
Cd52	Gsto1
Cd53	Gtpbp2
Cd63	Gtpbp4
Cd68	H2-Q7
Cd72	H2afz
Cd74	Has2
Cd84	Hax1
Cd86	Hdac8
Cd9	Herpud1
Cd93	Hfe
Cd97	Hhipl1
Cdc42bpg	Hist2h4
Cdh10	Hmox1
Cdh15	Hspa5
Cdh5	Htatip2
Cdh7	Htra1
Cdh8	Iars
Cdkl5	Ick
Cdkn1a	Ier2
Cdon	Ifi44
Ceacam1	Ifitm6
Cebpg	Ift172
Cecr2	Il1r1
Cerkl	Il2
Cfh	Il23a
Chac1	Incenp
Chd5	Inpp4b
Chi3l1	Inpp5b
Chrd	Ip6k2
Chrm2	Ipmk
Chrm3	Itgb5
Chrna4	Itgb7
Cited2	Itih1
Cldn5	Jagn1
Clec2d	Jdp2
Clec5a	Jhdm1d
Clec7a	Kbtbd5
Clic1	Kcnt2
Clic4	Kdm5a
Clvs2	Kdm6b
Cmbl	Khnyn
Cnksr3	Kif13b
Cnn2	Kifc1
Cnnm4	Klf15
Cnpy1	Klf4
Cntn6	Klhdc10
Cntnap1	Krtcap2
Cntnap4	Lars
Coro2a	Lcn2
Cox6a2	Leprel1
Cp	Leprotl1
Cpne6	Lgals3
Cpne9	Lgals8
Cpxm2	Lhfpl2
Crabp1	Lmbrd1
Crip2	Lmo4
Crtam	Lonp1
Cry1	Lrrk1
Csf1	Lsg1
Csf1r	Lsm14a
Csf3r	Ltbp3
Cst7	Macrod1
Cth	Manea
Ctla2a	March6
Ctsc	Mars
Ctsd	Mat2b
Ctsh	Maz
Ctss	Mdfic
Ctsz	Mettl9
Ctxn1	Mff
Cx3cr1	Mid1ip1
Cxadr	Mmp19
Cxcl10	Mras
Cxcl16	Mrpl13
Cyb5r1	Mrpl24
Cyb5r2	Mrpl54
Cyba	Mtap4
Cyr61	Mthfd1l
Cyth4	Mthfd2
Cytsb	Mthfr
Cyyr1	Mtm1
D0H4S114	Mycbp2
D17H6S56E-3	Myom1
D830030K20Rik	Naaa
D8Ertd82e	Nars
D930030D11Rik	Ncl
Dab2	Ndrg1
Dab2ip	Ndufa4l2
Dach2	Nf1
Dact1	Nfe2l1
Dbpht2	Nfkb1
Ddit3	Nfu1
Ddr2	Nipbl
Ddx58	Nme2
Depdc6	Nos2
Dgkk	Nosip
Dhrs7	Nrbf2
Dio2	Nrip2
Diras2	Nupr1
Dixdc1	Optc
Dleu7	Ormdl3
Dnahc11	Osmr
Dnahc6	Otub2
Dock2	Pacsin2
Dpp6	Paqr3
Dpysl4	Pax8
Dtx3l	Pck2
Dus4l	Pdap1
Dusp16	Pde1a
Dusp4	Pde4dip
E330009J07Rik	Per2
E530001K10Rik	Per3
Echdc2	Pfdn1
Ecm2	Pgpep1l
Ednrb	Phf10
Efemp1	Phf21a
Eif2s2	Phgdh
Eif3c	Phyhd1
Eif4ebp1	Pik3c2g
Eltd1	Pkmyt1
Emcn	Pla2g12a
Emr1	Pld1
Eno2	Plekhh3
Entpd1	Pnrc2
Epb4.1l2	Pop5
Epb4.1l4b	Ppp1r15a
Epha3	Ppp1r15b
Ephb2	Ppp2r5a
Ephx3	Prdm15
Epn3	Prkg2
Eprs	Prss35
Erc1	Prss36
Esam	Psat1
Etf1	Ptbp1
Etv5	Ptn
Evi2a	Ptpn12
Exph5	Ptpn21
Extl1	Ptprs
Ezr	Pvrl2
Fam129a	Pycr1
Fam131b	Rab39b
Fam135b	Rad21
Fam189a2	Rai1
Fam19a1	Ran
Fam46c	Rbm39
Fam84b	Rbm4
Fat2	Rbm9
Fbln5	Rcc2
Fbxl22	Rd3
Fcer1g	Reln
Fcgr2b	Rhbdd1
Fcgr3	Rhoq
Fcrls	Rnaset2b
Fgf16	Rnf114
Fibin	Rpl13a
Fli1	Rpl7
Flrt3	Rprd2
Fmo1	Rps6ka2
Fmod	Rsbn1
Fn1	Runx3
Fnbp1l	Ruvbl2
Fos	Samd4
Fosb	Samd8
Fosl2	Sars
Foxn2	Scpep1
Frmd4b	Sema6d
Fstl5	Serpina3c
Ftsjd1	Serpinb9
Fxyd5	Serpinf1
Fxyd7	Sertad2
Fyb	Sesn2
Fzd7	Sh3bp5l
Gabra3	Shmt2
Gabra6	Slc16a14
Gabrd	Slc19a2
Gabrg3	Slc1a4
Gabrq	Slc1a5
Galnt13	Slc1a7
Galnt7	Slc20a1
Galnt9	Slc25a28
Gap43	Slc25a33
Gars	Slc25a39
Gas7	Slc35b4
Gbp2	Slc38a2
Gbp3	Slc38a7
Gbp4	Slc3a2
Gbp6	Slc41a3
Gca	Slc6a9
Gcnt1	Slc7a1
Gdf15	Slc7a11
Gfap	Slc7a5
Gfra1	Slc9a9
Glce	Slco1a5
Glra1	Slit1
Glra2	Sltm
Glra3	Snai2
Gm10048	Snrnp35
Gm10118	Snx12
Gm10403	Snx33
Gm10406	Soat2
Gm10561	Spats2
Gm10694	Spen
Gm11275	Spred1
Gm11277	Sqstm1
Gm11517	Srpk1
Gm12643	Srsf1
Gm129	Stard5
Gm1332	Stc2
Gm15470	Steap1
Gm3696	Stk40
Gm3893	Surf6
Gm5246	Synj2
Gm5502	Tab2
Gm6394	Taf15
Gm6548	Taf5
Gm7691	Tagln2
Gm885	Tars
Gm8936	Tbc1d9b
Gm8995	Tbce
Gm9753	Tbpl1
Gm996	Tet3
Gng4	Tgif1
Gng5	Tlcd2
Gpnmb	Tmem11
Gpr116	Tmem154
Gpr137b	Tmem189
Gpr137b-ps	Tmem74
Gpr137c	Tmigd1
Gpr165	Tmtc2
Gpr22	Tnfaip2
Gpr52	Tnks
Gpr56	Tnpo1
Gpr68	Tnrc6c
Gpr84	Tor3a
Gpr98	Tpx2
Gprc5c	Traf3ip2
Gpt2	Trem3
Gpx3	Trib3
Gpx8	Trim35
Grb7	Trim66
Grin2a	Tsc22d3
Grin2c	Tslp
Grk5	Tspan5
Grm4	Tspyl4
Grn	Ttc23
Gsto1	Ttc9c
Gtpbp2	Uba3
Gusb	Ube2g2
Gvin1	Ube2l3
H2-Aa	Ube2w
H2-Ab1	Ubp1
H2-DMa	Ubr2
H2-K1	Ubr4
Hap1	Ugt1a6a
Hapln1	Uhrf1bp1
Hax1	Uqcrc2
Herc5	Uqcrq
Herpud1	Usp11
Hexa	Usp2
Hexb	Usp36
Hist1h1c	Usp6nl
Hist1h2ak	Vac14
Hmgcs2	Vars
Hmox1	Vldlr
Hpgd	Vnn3
Hpgds	Vps54
Hr	Wars
Hrsp12	Wbp4
Hspa9	Wdr27
Htr2a	Wisp1
Htr2c	Wwp2
Hvcn1	Wwtr1
I830012O16Rik	Xpot
Iars	Yars
Id3	Ylpm1
Ifi27l1	Ypel5
Ifi30	Ywhag
Ifi44	Zbtb38
Ifih1	Zbtb7b
Ifit1	Zbtb7c
Ifit2	Zc3h18
Ifit3	Zc3hav1
Ifitm3	Zfc3h1
Igf1	Zfp238
Igfbp7	Zfp365
Igsf21	Zfp598
Igsf9b	Zfp608
Il10rb	Zfp623
Il13ra1	Zfp708
Il1rapl1	Zyg11b
Il20rb
Il2rg
Il33
Inadl
Inpp5d
Irf7
Irf8
Irgm1
Irgm2
Isg20
Isoc1
Itga1
Itga6
Itgam
Itgax
Itgb2
Itih5
Itm2a
Itpkb
Jph4
Kcnc1
Kcnc2
Kcnd2
Kcne1l
Kcnh1
Kcnh5
Kcnj12
Kcnj2
Kcnj6
Kcnj9
Kcnk10
Kcnk6
Kcnk9
Kcns2
Kcnt1
Kcnt2
Kctd15
Kctd16
Kctd4
Kdr
Kif26b
Kirrel3
Klhl3
Klhl6
Kndc1
Krt73
Lag3
Lair1
Lap3
Laptm5
Lars
Lbh
Lcp1
Lcp2
Lct
Ldb2
Ldlr
Ldoc1
Lect1
Leprotl1
Lgals3bp
Lgals9
Lgi2
Lgr5
Lilrb4
Lipa
Lmo2
Lmo3
Lmo4
Lonp1
Lpcat2
Lpl
Lrrc3b
Lrrc4
Lrrc7
Lrrc8d
Ltbp2
Ly6a
Ly6g
Ly86
Ly96
Lypd6
Lyz2
Mafb
Mal2
Mamdc2
Maml2
Maob
Mapk11
Mapk12
Mars
Mcm8
Mctp1
Meig1
Meis2
Mfsd4
Mgst1
Mgst3
Mical2
Mina
Mir134
Mir135a-2
Mir181b-1
Mir23b
Mir27b
Mir300
Mir30b
Mir340
Mir344
Mir369
Mir377
Mir380
Mir382
Mir384
Mir485
Mir487b
Mir505
Mir690
Mir703
Mirg
Mirlet7e
Mknk1
Mmp23
Mpa2l
Mpeg1
Mpp3
Mpp7
Mrgprf
Ms4a6c
Mtbp
Mthfd1l
Mthfd2
Mtus2
Mus81
Mustn1
Mybpc3
Myc
Myl9
Myof
Naaladl2
Naf1
Naip5
Nampt
Nars
Nbl1
Nckap1l
Ncrna00085
Ndst3
Necab2
Necab3
Nedd4l
Neto1
Neurl1a
Neurod1
Nfe2l2
Nfil3
Nkd1
Nnat
Nol8
Nop14
Nop58
Nos1
Nostrin
Nov
Npas2
Npas4
Npc1l1
Npl
Npnt
Npy2r
Nr4a1
Nr4a2
Nr4a3
Nrg2
Nrg3
Nrp1
Nsg2
Nt5c1a
Nt5dc2
Ntf3
Ntn4
Nudt10
Nudt11
Nup43
Nup62
Nupr1
Nxph4
Oasl2
Odc1
Odf2
Odz1
Odz3
Odz4
Ogn
Olfm3
Olfml3
Olfr111
Olfr46
Olfr539
Opn3
Osmr
Ostn
Otub2
P2ry12
P2ry13
P2ry14
P2ry6
Pabpc1l2b
Padi2
Palmd
Pam
Pamr1
Pappa
Paqr3
Pard6g
Pcdh11x
Pcdh18
Pcdh19
Pclo
Pde1c
Pdzd7
Pecam1
Peg10
Per2
Pex11a
Pglyrp1
Pgm2l1
Pgm5
Phactr3
Phf10
Phgdh
Phlda3
Phxr4
Phyhd1
Phyhip
Pid1
Pik3r3
Pip5k1b
Pisd-ps1
Pkib
Plagl1
Plau
Plch2
Plcxd3
Pld4
Pld5
Plek
Plekha2
Plekha5
Plekho1
Plin2
Plk5
Pllp
Pln
Plp2
Plscr2
Pms1
Pnp
Pnpla3
Podxl
Pon3
Porcn
Ppargc1b
Ppfia4
Ppp2r5a
Pqlc3
Prcp
Prelp
Prkar2b
Prkch
Prl2c3
Prnd
Pros1
Prosapip1
Prr15
Prrg4
Prrt2
Psat1
Psph
Ptchd1
Ptges
Ptpn22
Ptpro
Pxdn
Pycr1
Qpct
Rab15
Rabgap1l
Rad54l
Ralyl
Rapgef4
Rasgrf2
Rasgrp3
Rassf4
Rbp4
Rcc2
Reep6
Reln
Resp18
Rfx3
Rgl3
Rgs10
Rgs4
Rgs5
Rif1
Rimklb
Rims1
Rims2
Rin2
Rnf112
Rnf123
Rnf133
Rnf148
Rnf152
Rnf213
Ror1
Rpp25
Rps6ka2
Rrs1
Rsph4a
Rtp4
Rxrg
Ryr2
Ryr3
S1pr3
Samd14
Samsn1
Sars
Scn2a1
Scn3b
Scnn1g
Scpep1
Scx
Sebox
Selplg
Sema3c
Sema3d
Serpina3n
Serpinb2
Serpinb9
Serpine2
Serpinf1
Sesn2
Sfpi1
Sft2d2
Sgpp2
Sh2d3c
Sh3bgr
Sh3glb2
Sh3kbp1
Shmt2
Sidt1
Sla
Slc11a1
Slc14a1
Slc15a2
Slc16a11
Slc16a14
Slc16a4
Slc17a6
Slc1a4
Slc25a18
Slc29a4
Slc2a4
Slc2a6
Slc35f3
Slc39a12
Slc3a2
Slc40a1
Slc43a3
Slc6a11
Slc6a9
Slc7a1
Slc7a11
Slc7a2
Slc7a3
Slc7a5
Slc8a2
Slc9a5
Slc9a9
Slco1a4
Slco1c1
Slco2a1
Slco2b1
Slfn5
Slit1
Slit2
Slitrk4
Smyd5
Sncg
Soat1
Soat2
Sox11
Sp100
Spag1
Spata1
Speg
Sphkap
Spock1
Spp1
Spry4
Srebf1
Srgn
Srrm4
Ssbp2
Sstr2
St18
St3gal2
St3gal5
St6galnac5
St8sia5
St8sia6
Stab1
Stap2
Stard4
Stard5
Stat2
Stc2
Stxbp5l
Stxbp6
Suclg2
Sulf1
Sv2c
Svep1
Svop
Syde1
Syne1
Synpr
Syt12
Syt2
Syt5
Syt9
Tac1
Tanc2
Tars
Tbata
Tbc1d25
Tbc1d8
Tbrg1
Tbxas1
Tc2n
Tcfap2d
Tcn2
Tdo2
Tead4
Tecpr1
Tek
Tekt5
Tesc
Tgfb1
Tgfbr1
Tgfbr2
Tgif1
Tgm5
Tgtp1
Th
Thbd
Thbs1
Thbs4
Tiam1
Timp1
Timp2
Tle2
Tll1
Tlr13
Tlr3
Tlr7
Tm4sf1
Tm6sf2
Tm7sf2
Tmem100
Tmem108
Tmem132a
Tmem132c
Tmem140
Tmem145
Tmem176a
Tmem176b
Tmem178
Tmem179
Tmem201
Tmem229b
Tmem25
Tmtc4
Tnc
Tnfaip6
Tnfsf10
Tor3a
Tpcn2
Tprkb
Trank1
Trem2
Trem3
Trhde
Trib3
Trim12
Trim25
Trim30
Trim66
Trp53
Trpc6
Tshz2
Tspan6
Ttc18
Txnip
Tyro3
Tyrobp
Ubash3b
Ucp2
Unc13c
Unc93b1
Usp18
Usp3
Usp36
Vat1
Vav1
Vcam1
Vegfa
Vgf
Vipr2
Vstm2a
Vwa5a
Wars
Wdr17
Wscd2
Xaf1
Xk
Xkr6
Xlr
Xpot
Yars
Yjefn3
Ypel4
Zc3h6
Zcchc12
Zcchc5
Zdbf2
Zfp36l1
Zfp385b
Zfp467
Zfp521
Zfyve28
Zkscan16
Zmynd8
