# Supplementary material for: Activation of GCN2 kinase by ribosome stalling links translation elongation with translation initiation
Source: eLife. 2016 Apr 16;5:e14295. doi: 10.7554/eLife.14295 (PMC4917338; doi:10.7554/eLife.14295)
Supplement: Figure 2—source data 2. — DOI: http://dx.doi.org/10.7554/eLife.14295.013 [file elife-14295-fig2-data2.xlsx]

## Sheet: Common Genes
Figure 2-Source Data 2 Gene list of upregulated genes common between the B6-nmf205-/- cerebellum and hippocampus at 5 weeks of age.
	Significance (q < 0.05)				Fold of induction (B6J-nmf205-/- vs B6J)
Gene name	3W Cb	3W Hp	ATF4 Chip target		3W Cb	5W Cb	3W Hp	5W Hp
1700007K13Rik					1.16191	1.77757	-1.05643	1.69109
1700028P14Rik	+				1.51775	1.60521	1.40359	2.37125
1810010H24Rik	+				2.20655	2.23132	1.71567	2.02615
4930486G11Rik	+				3.77498	3.04966	1.75356	1.86134
Abca1	+				1.69853	1.91751	1.33548	1.50335
Aldh18a1	+		+		2.65826	2.21385	1.91422	2.23294
Aldh1l2	+		+		5.49436	2.75856	3.79245	2.81267
Asns	+	+	+		2.93384	2.31488	1.88053	2.041
Atf3	+		+		2.50295	2.28829	1.40742	1.74536
Atf4	+	+			1.75706	1.63127	1.84145	1.74076
C4b					1.41141	3.30785	1.29932	1.72486
Cars	+	+	+		2.49802	1.94815	2.09932	2.14677
Cdkn1a	+				1.96067	2.88096	2.01237	1.87034
Chac1	+	+	+		5.21389	4.55284	2.92925	3.91268
Cox6a2	+	+			4.79523	4.76665	2.41731	3.24027
Cyb5r1	+		+		4.66046	4.06544	2.12031	3.24917
Cyb5r2	+				3.16838	3.61377	1.32784	1.6853
Ddit3	+		+		1.90569	1.92681	1.58312	2.52465
Ddr2	+		+		5.52312	5.72143	2.54261	2.78892
Dhrs7	+		+		1.62084	1.6527	1.28378	1.56591
Eif2s2	+		+		1.90968	1.76801	1.49823	1.54084
Eif4ebp1	+		+		3.13856	2.19528	2.12686	2.24671
Fam129a	+		+		3.54396	5.91337	1.44033	1.73714
Fbln5	+				2.70945	3.41813	1.44675	1.66008
Fibin	+		+		2.3132	2.57685	1.3605	1.94807
Fos	+				3.97557	2.2456	1.80196	1.73893
Gars	+		+		2.38301	2.18357	1.45227	1.76131
Herpud1	+		+		2.19472	2.02941	1.46361	2.0013
Hmox1	+		+		1.86521	2.67507	1.29982	1.78977
Hspa9	+				1.87795	1.87871	1.32885	1.52615
Iars	+		+		2.02842	1.75086	1.5148	1.75927
Ifit3	+				1.70539	3.26866	1.52852	1.96282
Lars	+		+		2.24175	1.96108	1.64084	1.74738
Leprotl1	+		+		1.93728	1.86797	1.32434	1.55099
Mars	+		+		1.93632	1.53705	1.63596	1.74621
Mthfd2	+	+	+		5.67318	3.85968	3.69388	4.55955
Nars	+		+		1.84825	1.79843	1.52171	1.77715
Nupr1	+		+		2.98396	3.54273	1.73702	1.61851
Phf10	+		+		2.58976	2.85967	1.43378	1.69485
Phgdh	+		+		1.74481	2.04456	1.18149	1.54142
Prelp					1.40302	1.68094	1.11222	1.59796
Psat1	+		+		1.85979	2.06278	1.30193	1.50768
Psph	+	+			1.91059	1.79192	1.69756	1.96174
Pycr1	+		+		2.66742	2.04053	1.51952	2.01516
Rtp4					1.21669	2.34923	1.21382	1.7385
Sars	+		+		1.92284	1.62268	1.41711	1.66282
Scpep1			+		1.43939	1.74206	1.1478	1.52518
Sesn2	+		+		6.27984	4.41159	2.44292	2.79732
Shmt2	+		+		3.3674	2.7957	2.35013	2.75547
Slc16a14	+		+		2.55584	2.54339	1.62701	1.66063
Slc1a4	+	+	+		3.16693	2.9695	1.74872	2.13342
Slc7a1	+	+	+		3.3889	2.95889	2.09067	2.41845
Slc7a11	+		+		2.42607	3.1806	1.17349	1.74418
Slc7a3	+	+			21.2327	8.40456	6.54023	6.22612
Slc7a5	+		+		2.4969	2.38431	1.70539	2.02247
Stc2	+		+		4.41619	4.59298	2.07894	2.55019
Tars	+		+		2.13465	2.10637	1.39628	1.62594
Tm4sf1					1.49053	1.7037	1.20014	1.514
Trim66	+		+		4.38036	3.42583	3.02164	2.87694
Txnip					-1.08226	1.94494	1.05821	1.59014
Xpot	+		+		2.40369	2.26834	1.3506	1.60978
Yars	+		+		2.0642	1.8577	1.5983	1.64865
Zcchc12	+				3.05844	4.20378	1.24147	1.66071
