# Supplementary material for: Activation of GCN2 kinase by ribosome stalling links translation elongation with translation initiation
Source: eLife. 2016 Apr 16;5:e14295. doi: 10.7554/eLife.14295 (PMC4917338; doi:10.7554/eLife.14295)
Supplement: Figure 3—source data 1. — DOI: http://dx.doi.org/10.7554/eLife.14295.015 [file elife-14295-fig3-data1.xlsx]

## Sheet: Upregulated 205J vs B6J (146)
Figure 3 Supplement-Table 1. Genes that were upregulated in B6J-nmf205-/- vs B6J cerebellum.
id	name	baseMean	log2foldChange	lfcSE	stat	pval	padj	lfc	mlog10padj	RFC
NM_011819	Gdf15	130.236	-4.27428	0.236797	-18.0504	7.83043e-73	1.9811e-69	0.0516791	-68.7031	19.3502
NM_007515	Slc7a3	354.511	-4.06175	0.16652	-24.3919	2.08406e-131	1.5818e-127	0.0598813	-126.801	16.6997
NM_144907	Sesn2	185.822	-3.12489	0.179119	-17.4459	3.6984e-68	7.01772e-65	0.114634	-64.1538	8.72339
NM_007918	Eif4ebp1	51.2621	-2.7319	0.248568	-10.9906	4.24304e-28	1.4002e-25	0.150527	-24.8538	6.64331
NM_008638	Mthfd2	154.452	-2.6962	0.182341	-14.7866	1.78882e-49	1.9396e-46	0.154299	-45.7123	6.48092
NM_026929	Chac1	60.0823	-2.57661	0.236629	-10.8888	1.30329e-27	4.12165e-25	0.167634	-24.3849	5.96537
NM_011491	Stc2	41.7058	-2.51615	0.25337	-9.93072	3.0605e-23	7.03916e-21	0.174809	-20.1525	5.72053
NM_022563	Ddr2	139.582	-2.49123	0.187786	-13.2663	3.63082e-40	2.27645e-37	0.177855	-36.6427	5.62255
NM_028057	Cyb5r1	147.051	-2.31432	0.18707	-12.3714	3.73246e-35	1.77058e-32	0.201057	-31.7519	4.97371
NM_030693	Atf5	156.557	-2.10972	0.169175	-12.4707	1.07912e-35	5.85035e-33	0.231692	-32.2328	4.31608
NM_153543	Aldh1l2	121.229	-2.06874	0.187418	-11.0381	2.50325e-28	8.63621e-26	0.238368	-25.0637	4.1952
NM_012055	Asns	653.256	-2.03782	0.110064	-18.5149	1.56613e-76	5.94344e-73	0.243531	-72.226	4.10625
NM_007513	Slc7a1	235.16	-1.93816	0.156398	-12.3925	2.86999e-35	1.45221e-32	0.26095	-31.838	3.83216
NM_009829	Ccnd2	49.2289	-1.90668	0.236485	-8.06261	7.46816e-16	1.04969e-13	0.266705	-12.9789	3.74946
NM_176933	Dusp4	42.3246	-1.84522	0.245913	-7.50353	6.21197e-14	6.83316e-12	0.278314	-11.1654	3.59307
NM_018861	Slc1a4	190.099	-1.80662	0.152548	-11.843	2.33986e-32	1.04468e-29	0.28586	-28.981	3.49822
NM_001195265	Pdzd7	55.9488	-1.72634	0.224447	-7.69154	1.45371e-14	1.72401e-12	0.302218	-11.7635	3.30887
NM_009510	Ezr	209.388	-1.72508	0.165296	-10.4363	1.69275e-25	4.94153e-23	0.302481	-22.3061	3.30599
NM_011404	Slc7a5	710.559	-1.71637	0.107648	-15.9442	3.12543e-57	4.7444e-54	0.304313	-53.3238	3.28609
NM_019430	Cacng3	81.4402	-1.6559	0.202856	-8.16292	3.27034e-16	4.77344e-14	0.317341	-13.3212	3.15119
NM_028230	Shmt2	35.6476	-1.63735	0.248196	-6.59703	4.19488e-11	3.0323e-09	0.321445	-8.51823	3.11095
NM_022018	Fam129a	52.6769	-1.61824	0.229219	-7.05979	1.6676e-12	1.40635e-10	0.325733	-9.85191	3.07
NM_133900	Psph	128.256	-1.56847	0.169687	-9.24331	2.38981e-20	4.77333e-18	0.337167	-17.3212	2.96589
NM_024250	Phf10	204.87	-1.53198	0.147348	-10.397	2.55906e-25	7.19381e-23	0.345803	-22.143	2.89182
NM_022331	Herpud1	526.775	-1.5151	0.111199	-13.6252	2.83699e-42	1.95752e-39	0.349872	-38.7083	2.85819
NM_030707	Fcrls	109.155	-1.48401	0.184546	-8.04141	8.88135e-16	1.20374e-13	0.357494	-12.9195	2.79725
NM_173867	Rcc2	118.442	-1.46959	0.175263	-8.38509	5.06884e-17	8.18563e-15	0.361084	-14.0869	2.76944
NM_011812	Fbln5	54.446	-1.46687	0.224624	-6.53033	6.56238e-11	4.56958e-09	0.361767	-8.34012	2.76421
NM_026271	Fibin	36.5471	-1.45994	0.250068	-5.83814	5.27859e-09	2.80171e-07	0.363509	-6.55258	2.75096
NM_027921	Slc16a14	69.6193	-1.42768	0.210932	-6.76843	1.30188e-11	1.01869e-09	0.371728	-8.99196	2.69014
NM_180678	Gars	1343.79	-1.42011	0.092347	-15.3779	2.30192e-53	2.91192e-50	0.373685	-49.5358	2.67605
NM_134137	Lars	400.638	-1.33883	0.127992	-10.4603	1.3149e-25	3.99203e-23	0.395342	-22.3988	2.52945
NM_146200	Eif3c	1139.46	-1.33001	0.0926108	-14.3613	9.04664e-47	8.583e-44	0.397764	-43.0664	2.51405
NM_001081056	Xpot	317.943	-1.31971	0.1275	-10.3507	4.15578e-25	1.05141e-22	0.400616	-21.9782	2.49615
NM_010481	Hspa9	1333.46	-1.29293	0.0927769	-13.9359	3.83531e-44	2.911e-41	0.408122	-40.536	2.45024
NM_175093	Trib3	51.2307	-1.27928	0.26772	-4.77841	1.76683e-06	5.38565e-05	0.412002	-4.26876	2.42717
NM_007837	Ddit3	150.514	-1.2616	0.170833	-7.38502	1.52427e-13	1.52227e-11	0.417081	-10.8175	2.39762
NM_016966	Phgdh	597.912	-1.25775	0.107794	-11.6681	1.85571e-31	7.82492e-29	0.418197	-28.1065	2.39122
NM_134151	Yars	1304.5	-1.25246	0.0882517	-14.1919	1.02776e-45	8.66743e-43	0.419731	-42.0621	2.38248
NM_198422	Paqr3	50.8078	-1.23129	0.228007	-5.40025	6.65492e-08	3.04282e-06	0.425936	-5.51672	2.34777
NM_010444	Nr4a1	317.183	-1.23025	0.2265	-5.43156	5.58638e-08	2.60127e-06	0.426244	-5.58482	2.34608
NM_178080	Pde4dip	155.454	-1.17205	0.183664	-6.38147	1.75399e-10	1.17813e-08	0.443791	-7.92881	2.25331
NM_033074	Tars	185.763	-1.15145	0.153586	-7.49708	6.52559e-14	7.07561e-12	0.450173	-11.1502	2.22137
NM_029735	Eprs	885.617	-1.14199	0.112299	-10.1692	2.72223e-24	6.66506e-22	0.453135	-21.1762	2.20685
NM_010234	Fos	474.783	-1.13274	0.259508	-4.36497	1.27141e-05	0.000312565	0.456047	-3.50506	2.19275
NM_031172	Trim17	53.0113	-1.10412	0.229889	-4.80286	1.56417e-06	4.96737e-05	0.465185	-4.30387	2.14968
NM_053074	Nup62	215.737	-1.09748	0.140763	-7.79661	6.35937e-15	7.7851e-13	0.467333	-12.1087	2.1398
NM_021461	Mknk1	144.386	-1.09651	0.173923	-6.30455	2.89041e-10	1.87186e-08	0.467648	-7.72773	2.13836
NM_009780	C4b	150.989	-1.07359	0.170587	-6.29353	3.10334e-10	1.97936e-08	0.475134	-7.70348	2.10467
NM_173866	Gpt2	190.635	-1.07292	0.155719	-6.89011	5.57477e-12	4.54973e-10	0.475355	-9.34201	2.10369
NM_016701	Nes	206.126	-1.07242	0.155635	-6.8906	5.55586e-12	4.54973e-10	0.47552	-9.34201	2.10296
NM_178932	Aoc2	42.0382	-1.06892	0.234938	-4.54981	5.36949e-06	0.000146599	0.476675	-3.83387	2.09786
NM_010442	Hmox1	55.0697	-1.06457	0.217331	-4.89838	9.66285e-07	3.23088e-05	0.478115	-4.49068	2.09155
NM_009777	C1qb	86.7532	-1.04882	0.19071	-5.49955	3.80767e-08	1.85258e-06	0.483365	-5.73222	2.06883
NM_172015	Iars	691.209	-1.04235	0.106326	-9.80338	1.08875e-22	2.36103e-20	0.485535	-19.6269	2.05959
NM_013657	Sema3c	56.8049	-1.03134	0.215337	-4.78943	1.67258e-06	5.18159e-05	0.489255	-4.28554	2.04392
NM_146217	Aars	1269.74	-1.02895	0.103289	-9.96185	2.23848e-23	5.3094e-21	0.490067	-20.275	2.04054
NM_013885	Clic4	392.073	-1.02571	0.1224	-8.38	5.29293e-17	8.36944e-15	0.491168	-14.0773	2.03596
NM_009744	Bcl6	197.9	-1.02117	0.153093	-6.67022	2.55415e-11	1.90059e-09	0.492717	-8.72111	2.02956
NM_023794	Etv5	338.193	-0.994975	0.127566	-7.7997	6.20544e-15	7.7212e-13	0.501745	-12.1123	1.99305
NM_001033302	Gm129	125.262	-0.99334	0.170094	-5.83993	5.22212e-09	2.79126e-07	0.502314	-6.5542	1.99079
NM_133859	Olfml3	81.9842	-0.992925	0.191548	-5.1837	2.17527e-07	8.25516e-06	0.502458	-5.08327	1.99022
NM_001045514	Akna	95.4279	-0.992237	0.181889	-5.45517	4.89262e-08	2.29228e-06	0.502698	-5.63973	1.98927
NM_009716	Atf4	950.219	-0.991326	0.0957469	-10.3536	4.02988e-25	1.05141e-22	0.503015	-21.9782	1.98801
NM_010277	Gfap	128.016	-0.985653	0.181752	-5.42308	5.85814e-08	2.71117e-06	0.504997	-5.56684	1.98021
NM_133674	Arhgef5	45.897	-0.973042	0.229862	-4.23315	2.30436e-05	0.00052681	0.509431	-3.27835	1.96298
NM_019578	Extl1	73.8064	-0.967098	0.201601	-4.79708	1.60996e-06	5.07038e-05	0.511534	-4.29496	1.9549
NM_011580	Thbs1	42.1172	-0.950962	0.232996	-4.08144	4.47567e-05	0.000938407	0.517287	-3.02761	1.93316
NM_026030	Eif2s2	564.721	-0.937454	0.111762	-8.38794	4.9474e-17	8.16322e-15	0.522154	-14.0881	1.91514
NM_010740	Cd93	56.24	-0.935962	0.222793	-4.20103	2.65698e-05	0.000596641	0.522694	-3.22429	1.91317
NM_001159964	Eps15	38.9862	-0.930695	0.236138	-3.94132	8.1033e-05	0.00158915	0.524605	-2.79884	1.90619
NM_183289	Tcerg1l	53.4646	-0.924542	0.225773	-4.09501	4.22157e-05	0.000900049	0.526848	-3.04573	1.89808
NM_010686	Laptm5	51.4322	-0.895684	0.225924	-3.96454	7.35388e-05	0.00145354	0.537492	-2.83757	1.86049
NM_009884	Cebpg	43.0774	-0.892521	0.23147	-3.85588	0.000115314	0.00211409	0.538672	-2.67488	1.85642
NM_007572	C1qa	74.0851	-0.882383	0.200975	-4.39052	1.13082e-05	0.000284203	0.542471	-3.54637	1.84342
NM_013805	Cldn5	119.596	-0.878497	0.169413	-5.18554	2.1539e-07	8.23192e-06	0.543934	-5.0845	1.83846
NM_026609	Leprotl1	135.759	-0.878146	0.167029	-5.25743	1.46079e-07	5.95786e-06	0.544066	-5.22491	1.83801
NM_010422	Hexb	301.456	-0.872313	0.130945	-6.66168	2.7072e-11	1.99492e-09	0.54627	-8.70008	1.8306
NM_133234	Bbc3	59.0691	-0.864571	0.21187	-4.08067	4.49066e-05	0.000938956	0.54921	-3.02735	1.8208
NM_011671	Ucp2	149.904	-0.860934	0.162411	-5.30095	1.15204e-07	4.88491e-06	0.550596	-5.31114	1.81621
NM_153505	Nckap1l	40.6901	-0.847575	0.232122	-3.65142	0.000260791	0.00419365	0.555718	-2.37741	1.79947
NM_011340	Serpinf1	99.8785	-0.845579	0.177214	-4.7715	1.82856e-06	5.54764e-05	0.556487	-4.25589	1.79699
NM_147776	Vwa1	151.502	-0.843183	0.160006	-5.2697	1.36649e-07	5.65235e-06	0.557413	-5.24777	1.794
NM_001166651	Klhl33	138.644	-0.841261	0.160179	-5.25199	1.50461e-07	6.01053e-06	0.558156	-5.22109	1.79162
NM_001164659	Trank1	1124.62	-0.838395	0.0888963	-9.43115	4.05602e-21	8.32033e-19	0.559265	-18.0799	1.78806
NM_183020	Atxn2l	1346.53	-0.830703	0.0955017	-8.6983	3.36889e-18	6.23655e-16	0.562255	-15.2051	1.77855
NM_027280	Nkd1	39.9597	-0.820942	0.232858	-3.5255	0.000422688	0.00621744	0.566072	-2.20639	1.76656
NM_007805	Cyb561	40.0238	-0.818479	0.236975	-3.45386	0.000552616	0.00766793	0.567039	-2.11532	1.76355
NM_007574	C1qc	51.1664	-0.816815	0.231113	-3.53427	0.000408911	0.00604997	0.567694	-2.21825	1.76151
NM_009931	Col4a1	423.537	-0.807761	0.113916	-7.09087	1.33275e-12	1.1495e-10	0.571268	-9.93949	1.75049
NM_011299	Rps6ka2	73.0056	-0.791398	0.198552	-3.98585	6.724e-05	0.00133951	0.577784	-2.87306	1.73075
NM_025522	Dhrs7	147.011	-0.790191	0.153928	-5.13349	2.84411e-07	1.03783e-05	0.578268	-4.98388	1.7293
NM_175483	Snx33	62.9731	-0.789837	0.211934	-3.72682	0.000193914	0.0032562	0.578409	-2.48729	1.72888
NM_001039385	Vgf	90.129	-0.782744	0.204274	-3.83184	0.000127188	0.0022608	0.58126	-2.64574	1.7204
NM_008409	Itm2a	139.306	-0.782239	0.160518	-4.87322	1.09792e-06	3.60745e-05	0.581464	-4.4428	1.7198
NM_029078	Pcf11	296.633	-0.776763	0.154029	-5.04297	4.58358e-07	1.58855e-05	0.583675	-4.799	1.71328
NM_001199136	Macf1	170.242	-0.774635	0.172683	-4.48589	7.26114e-06	0.000193376	0.584537	-3.7136	1.71076
NM_007585	Anxa2	72.0101	-0.774416	0.201947	-3.83474	0.000125695	0.00224487	0.584625	-2.64881	1.7105
NM_021524	Nampt	177.271	-0.772752	0.150255	-5.14292	2.70502e-07	9.96654e-06	0.5853	-5.00146	1.70853
NM_009968	Cryz	67.4135	-0.771493	0.203301	-3.79483	0.000147746	0.00258386	0.585811	-2.58773	1.70704
NM_009976	Cst3	912.199	-0.766181	0.106637	-7.18496	6.72285e-13	6.14777e-11	0.587972	-10.2113	1.70076
NM_007771	Cry1	282.19	-0.765689	0.137657	-5.56231	2.66229e-08	1.31213e-06	0.588172	-5.88202	1.70018
NM_018868	Nop58	81.4596	-0.763272	0.201524	-3.7875	0.000152171	0.00265513	0.589159	-2.57591	1.69734
NM_145967	Vstm2a	52.4231	-0.753865	0.220377	-3.4208	0.000624378	0.00841746	0.593013	-2.07482	1.6863
NM_010495	Id1	62.0795	-0.750439	0.208291	-3.60284	0.000314759	0.00488553	0.594422	-2.31109	1.68231
NM_009063	Rgs5	109.435	-0.749004	0.177403	-4.22206	2.42084e-05	0.000550125	0.595014	-3.25954	1.68063
NM_010588	Jag2	103.103	-0.748529	0.176688	-4.23645	2.27079e-05	0.000520704	0.59521	-3.28341	1.68008
NM_001271397	unknown	131.679	-0.744935	0.170975	-4.35699	1.31863e-05	0.000321813	0.596695	-3.4924	1.6759
NM_080708	Bmp2k	128.318	-0.743763	0.164974	-4.50837	6.53272e-06	0.000175827	0.59718	-3.75491	1.67454
NM_198606	Dcaf13	60.9737	-0.737683	0.211588	-3.48642	0.00048954	0.00699738	0.599702	-2.15506	1.6675
NM_054053	Gpr98	69.5724	-0.723819	0.20221	-3.57954	0.000344197	0.00528838	0.605493	-2.27668	1.65155
NM_011150	Lgals3bp	59.4305	-0.719974	0.208154	-3.45886	0.000542466	0.00754592	0.607108	-2.12229	1.64715
NM_028782	Lonp1	699.998	-0.707741	0.0993491	-7.12378	1.05004e-12	9.26723e-11	0.612278	-10.0331	1.63324
NM_026376	Plxnd1	264.073	-0.70623	0.140287	-5.03418	4.79903e-07	1.65567e-05	0.61292	-4.78103	1.63154
NM_017373	Nfil3	84.2064	-0.703781	0.191615	-3.67289	0.000239824	0.00388946	0.613961	-2.41011	1.62877
NM_001081337	Sipa1l2	463.311	-0.703191	0.135365	-5.19479	2.0495e-07	7.89628e-06	0.614212	-5.10258	1.6281
NM_007913	Egr1	198.546	-0.699062	0.151612	-4.61087	4.00988e-06	0.000112306	0.615973	-3.9496	1.62345
NM_028994	Pck2	265.276	-0.697507	0.129397	-5.39044	7.02872e-08	3.13812e-06	0.616637	-5.50333	1.6217
NM_009983	Ctsd	571.93	-0.697323	0.0998098	-6.98652	2.81791e-12	2.35032e-10	0.616715	-9.62887	1.62149
NM_011587	Tie1	133.723	-0.694915	0.166625	-4.17054	3.03879e-05	0.000674398	0.617746	-3.17108	1.61879
NM_013454	Abca1	309.539	-0.688825	0.130727	-5.26919	1.37027e-07	5.65235e-06	0.620359	-5.24777	1.61197
NM_001033528	Usp36	291.163	-0.675283	0.123457	-5.46978	4.50593e-08	2.14706e-06	0.626209	-5.66815	1.59691
NM_028599	Wdr75	132.371	-0.674902	0.164037	-4.11432	3.88321e-05	0.000837317	0.626375	-3.07711	1.59649
NM_007625	Cbx4	249.695	-0.673209	0.129475	-5.19954	1.99782e-07	7.81623e-06	0.62711	-5.107	1.59462
NM_025289	Tbrg1	168.917	-0.672111	0.146752	-4.5799	4.65203e-06	0.000129337	0.627588	-3.88828	1.5934
NM_181071	Tanc2	256.975	-0.670856	0.14411	-4.65517	3.2371e-06	9.34206e-05	0.628134	-4.02956	1.59202
NM_133222	Eltd1	87.2708	-0.667741	0.186866	-3.57337	0.000352411	0.00540363	0.629492	-2.26731	1.58858
NM_029278	Nop14	171.403	-0.666021	0.152091	-4.37908	1.19179e-05	0.000297556	0.630243	-3.52643	1.58669
NM_007586	Calb2	3145.78	-0.66476	0.112714	-5.89775	3.68494e-09	2.04151e-07	0.630794	-6.69005	1.5853
NM_145154	Angptl6	88.4801	-0.662351	0.184293	-3.59402	0.000325615	0.00504372	0.631848	-2.29725	1.58266
NM_029023	Scpep1	105.444	-0.656233	0.175955	-3.72955	0.000191819	0.00322817	0.634533	-2.49104	1.57596
NM_013932	Ddx25	92.8378	-0.653386	0.179064	-3.6489	0.000263361	0.00422602	0.635786	-2.37407	1.57286
NM_144523	Zfp622	205.579	-0.647004	0.147805	-4.37741	1.201e-05	0.000298873	0.638605	-3.52451	1.56591
NM_001081395	Amotl1	103.204	-0.643455	0.174787	-3.68137	0.000231985	0.00379475	0.640178	-2.42082	1.56207
NM_016750	H2afz	372.991	-0.633016	0.120469	-5.25459	1.48358e-07	5.95786e-06	0.644827	-5.22491	1.5508
NM_146251	Pnpla7	115.212	-0.631795	0.168586	-3.74762	0.000178523	0.00306559	0.645373	-2.51349	1.54949
NM_009932	Col4a2	366.012	-0.631596	0.126729	-4.98384	6.23343e-07	2.1408e-05	0.645462	-4.66942	1.54928
NM_009875	Cdkn1b	361.569	-0.618105	0.118372	-5.2217	1.77286e-07	7.04501e-06	0.651526	-5.15212	1.53486
NM_153533	Tenc1	151.341	-0.613658	0.156944	-3.91004	9.22814e-05	0.00175984	0.653537	-2.75453	1.53013
NM_027427	Taf15	223.456	-0.606167	0.144712	-4.18878	2.80454e-05	0.000627918	0.65694	-3.2021	1.52221
NM_177897	B4galnt4	385.047	-0.604084	0.115747	-5.21901	1.79884e-07	7.11103e-06	0.657889	-5.14807	1.52001
NM_001081379	Ankrd11	1572.01	-0.598025	0.0953676	-6.27074	3.59338e-10	2.27281e-08	0.660658	-7.64344	1.51364
NM_001081178	Gpr116	167.317	-0.59591	0.1615	-3.68985	0.00022439	0.00371861	0.661627	-2.42962	1.51143
NM_177214	Snrnp200	798.553	-0.594972	0.101393	-5.86798	4.41125e-09	2.40873e-07	0.662057	-6.61821	1.51044
NM_013562	Ifrd1	103.471	-0.592374	0.174431	-3.39605	0.000683667	0.00904012	0.663251	-2.04383	1.50773
NM_013614	Odc1	149.857	-0.591436	0.162751	-3.634	0.000279064	0.00443116	0.663682	-2.35348	1.50675

## Sheet: Upreg genes -GCN2 downs (83)
Figure 3 Supplement-Table 1. Genes that were upregulated in B6J-nmf205-/- vs B6J cerebellum that go down in the B6J-Nmf205-/-;Gcn2 cerebellum.
		Comparison between B6J and B6J-nmf205-/-									Comparison between B6J-nmf205-/- and B6J-Gcn2-/-; nmf205-/-
id	name	baseMean	log2foldChange	lfcSE	stat	pval	padj	lfc	mlog10padj	RFC	baseMean	log2foldChange	lfcSE	stat	pval	padj	lfc	mlog10padj	RFC
NM_011819	Gdf15	130.236	-4.27428	0.236797	-18.0504	7.83043e-73	1.9811e-69	0.0516791	-68.7031	19.3502	144.421	4.30416	0.225211	19.1117	2.01859e-81	5.78327e-78	19.7552	-77.2378	0.0506195
NM_007515	Slc7a3	354.511	-4.06175	0.16652	-24.3919	2.08406e-131	1.5818e-127	0.0598813	-126.801	16.6997	393.559	3.96817	0.152795	25.9706	1.06455e-148	9.1498e-145	15.6508	-144.039	0.0638943
NM_144907	Sesn2	185.822	-3.12489	0.179119	-17.4459	3.6984e-68	7.01772e-65	0.114634	-64.1538	8.72339	222.043	2.32389	0.147296	15.777	4.47865e-56	6.41566e-53	5.00681	-52.1928	0.199728
NM_007918	Eif4ebp1	51.2621	-2.7319	0.248568	-10.9906	4.24304e-28	1.4002e-25	0.150527	-24.8538	6.64331	57.9837	2.64238	0.231242	11.4269	3.06856e-30	1.82852e-27	6.24363	-26.7379	0.160163
NM_008638	Mthfd2	154.452	-2.6962	0.182341	-14.7866	1.78882e-49	1.9396e-46	0.154299	-45.7123	6.48092	179.586	2.2479	0.162129	13.8649	1.03426e-43	9.87722e-41	4.74992	-40.0054	0.21053
NM_026929	Chac1	60.0823	-2.57661	0.236629	-10.8888	1.30329e-27	4.12165e-25	0.167634	-24.3849	5.96537	67.8839	2.46852	0.219986	11.2213	3.20557e-29	1.72199e-26	5.53477	-25.764	0.180676
NM_011491	Stc2	41.7058	-2.51615	0.25337	-9.93072	3.0605e-23	7.03916e-21	0.174809	-20.1525	5.72053	47.9731	2.30257	0.236137	9.75098	1.82692e-22	5.06528e-20	4.93335	-19.2954	0.202702
NM_022563	Ddr2	139.582	-2.49123	0.187786	-13.2663	3.63082e-40	2.27645e-37	0.177855	-36.6427	5.62255	152.06	2.64989	0.180623	14.6708	9.91611e-49	1.06536e-45	6.27618	-44.9725	0.159333
NM_028057	Cyb5r1	147.051	-2.31432	0.18707	-12.3714	3.73246e-35	1.77058e-32	0.201057	-31.7519	4.97371	155.814	2.74209	0.181975	15.0685	2.60841e-51	3.20276e-48	6.69041	-47.4945	0.149468
NM_030693	Atf5	156.557	-2.10972	0.169175	-12.4707	1.07912e-35	5.85035e-33	0.231692	-32.2328	4.31608	169.626	2.25786	0.165062	13.6788	1.35857e-42	1.16769e-39	4.78282	-38.9327	0.209082
NM_153543	Aldh1l2	121.229	-2.06874	0.187418	-11.0381	2.50325e-28	8.63621e-26	0.238368	-25.0637	4.1952	139.032	1.35187	0.251322	5.37905	7.48816e-08	3.23421e-06	2.55243	-5.49023	0.391783
NM_012055	Asns	653.256	-2.03782	0.110064	-18.5149	1.56613e-76	5.94344e-73	0.243531	-72.226	4.10625	764.03	1.65783	0.103086	16.0821	3.40783e-58	5.85806e-55	3.15542	-54.2322	0.316915
NM_007513	Slc7a1	235.16	-1.93816	0.156398	-12.3925	2.86999e-35	1.45221e-32	0.26095	-31.838	3.83216	277.056	1.54966	0.147421	10.5118	7.62541e-26	2.84958e-23	2.92748	-22.5452	0.341591
NM_009829	Ccnd2	49.2289	-1.90668	0.236485	-8.06261	7.46816e-16	1.04969e-13	0.266705	-12.9789	3.74946	55.9795	1.81754	0.220497	8.24291	1.68065e-16	2.8611e-14	3.52479	-13.5435	0.283705
NM_176933	Dusp4	42.3246	-1.84522	0.245913	-7.50353	6.21197e-14	6.83316e-12	0.278314	-11.1654	3.59307	57.6644	1.00347	0.20862	4.81005	1.50894e-06	4.41134e-05	2.00482	-4.35543	0.498798
NM_018861	Slc1a4	190.099	-1.80662	0.152548	-11.843	2.33986e-32	1.04468e-29	0.28586	-28.981	3.49822	218.741	1.57674	0.138026	11.4235	3.19114e-30	1.82852e-27	2.98295	-26.7379	0.335238
NM_001195265	Pdzd7	55.9488	-1.72634	0.224447	-7.69154	1.45371e-14	1.72401e-12	0.302218	-11.7635	3.30887	63.6333	1.60672	0.209263	7.67801	1.61582e-14	2.13661e-12	3.0456	-11.6703	0.328343
NM_009510	Ezr	209.388	-1.72508	0.165296	-10.4363	1.69275e-25	4.94153e-23	0.302481	-22.3061	3.30599	314.854	0.44485	0.134621	3.30448	0.000951545	0.00990136	1.36117	-2.00431	0.734661
NM_011404	Slc7a5	710.559	-1.71637	0.107648	-15.9442	3.12543e-57	4.7444e-54	0.304313	-53.3238	3.28609	737.407	2.1313	0.110064	19.3643	1.54516e-83	6.64031e-80	4.38112	-79.1778	0.228252
NM_019430	Cacng3	81.4402	-1.6559	0.202856	-8.16292	3.27034e-16	4.77344e-14	0.317341	-13.3212	3.15119	88.1002	1.75746	0.202436	8.68159	3.90259e-18	7.80065e-16	3.38103	-15.1079	0.295768
NM_028230	Shmt2	35.6476	-1.63735	0.248196	-6.59703	4.19488e-11	3.0323e-09	0.321445	-8.51823	3.11095	36.3893	2.13763	0.246497	8.67202	4.24507e-18	8.29237e-16	4.40037	-15.0813	0.227253
NM_022018	Fam129a	52.6769	-1.61824	0.229219	-7.05979	1.6676e-12	1.40635e-10	0.325733	-9.85191	3.07	55.2199	1.96691	0.22175	8.86991	7.3204e-19	1.6133e-16	3.90929	-15.7923	0.255801
NM_133900	Psph	128.256	-1.56847	0.169687	-9.24331	2.38981e-20	4.77333e-18	0.337167	-17.3212	2.96589	146.694	1.3714	0.165179	8.30252	1.01927e-16	1.78789e-14	2.58722	-13.7477	0.386515
NM_024250	Phf10	204.87	-1.53198	0.147348	-10.397	2.55906e-25	7.19381e-23	0.345803	-22.143	2.89182	227.852	1.49869	0.138083	10.8536	1.91726e-27	8.23941e-25	2.82587	-24.0841	0.353874
NM_022331	Herpud1	526.775	-1.5151	0.111199	-13.6252	2.83699e-42	1.95752e-39	0.349872	-38.7083	2.85819	626.83	1.14466	0.105991	10.7996	3.45794e-27	1.41529e-24	2.21093	-23.8492	0.452298
NM_173867	Rcc2	118.442	-1.46959	0.175263	-8.38509	5.06884e-17	8.18563e-15	0.361084	-14.0869	2.76944	146.746	0.975626	0.154494	6.31498	2.702e-10	1.77696e-08	1.96649	-7.75032	0.508519
NM_011812	Fbln5	54.446	-1.46687	0.224624	-6.53033	6.56238e-11	4.56958e-09	0.361767	-8.34012	2.76421	66.7569	1.05934	0.204544	5.17901	2.23071e-07	8.13238e-06	2.08397	-5.08978	0.479853
NM_026271	Fibin	36.5471	-1.45994	0.250068	-5.83814	5.27859e-09	2.80171e-07	0.363509	-6.55258	2.75096	39.339	1.67327	0.237371	7.0492	1.79955e-12	1.7985e-10	3.18937	-9.74509	0.313542
NM_027921	Slc16a14	69.6193	-1.42768	0.210932	-6.76843	1.30188e-11	1.01869e-09	0.371728	-8.99196	2.69014	80.7007	1.25017	0.19334	6.46617	1.0052e-10	7.64571e-09	2.37869	-8.11658	0.420399
NM_180678	Gars	1343.79	-1.42011	0.092347	-15.3779	2.30192e-53	2.91192e-50	0.373685	-49.5358	2.67605	1606.84	1.03922	0.0870132	11.9432	7.04642e-33	4.65877e-30	2.05511	-29.3317	0.486592
NM_134137	Lars	400.638	-1.33883	0.127992	-10.4603	1.3149e-25	3.99203e-23	0.395342	-22.3988	2.52945	486.46	0.918906	0.116381	7.89568	2.88737e-15	4.35385e-13	1.89068	-12.3611	0.52891
NM_146200	Eif3c	1139.46	-1.33001	0.0926108	-14.3613	9.04664e-47	8.583e-44	0.397764	-43.0664	2.51405	1516.09	0.559466	0.0818737	6.83328	8.2997e-12	7.35422e-10	1.47372	-9.13346	0.678553
NM_001081056	Xpot	317.943	-1.31971	0.1275	-10.3507	4.15578e-25	1.05141e-22	0.400616	-21.9782	2.49615	374.314	1.03683	0.113074	9.16947	4.75364e-20	1.10426e-17	2.05172	-16.9569	0.487397
NM_175093	Trib3	51.2307	-1.27928	0.26772	-4.77841	1.76683e-06	5.38565e-05	0.412002	-4.26876	2.42717	56.6086	2.26556	0.225259	10.0576	8.5067e-24	2.61125e-21	4.80841	-20.5832	0.207969
NM_007837	Ddit3	150.514	-1.2616	0.170833	-7.38502	1.52427e-13	1.52227e-11	0.417081	-10.8175	2.39762	153.092	1.72396	0.158805	10.8558	1.87128e-27	8.23941e-25	3.30342	-24.0841	0.302716
NM_016966	Phgdh	597.912	-1.25775	0.107794	-11.6681	1.85571e-31	7.82492e-29	0.418197	-28.1065	2.39122	680.943	1.11021	0.10637	10.4372	1.67647e-25	6.00387e-23	2.15877	-22.2216	0.463227
NM_134151	Yars	1304.5	-1.25246	0.0882517	-14.1919	1.02776e-45	8.66743e-43	0.419731	-42.0621	2.38248	1564.94	0.886388	0.082736	10.7135	8.80118e-27	3.43846e-24	1.84854	-23.4636	0.540967
NM_198422	Paqr3	50.8078	-1.23129	0.228007	-5.40025	6.65492e-08	3.04282e-06	0.425936	-5.51672	2.34777	54.8846	1.38229	0.214599	6.44127	1.18477e-10	8.55726e-09	2.60682	-8.06767	0.38361
NM_178080	Pde4dip	155.454	-1.17205	0.183664	-6.38147	1.75399e-10	1.17813e-08	0.443791	-7.92881	2.25331	182.193	0.932672	0.175772	5.30616	1.11958e-07	4.51772e-06	1.90881	-5.34508	0.523887
NM_033074	Tars	185.763	-1.15145	0.153586	-7.49708	6.52559e-14	7.07561e-12	0.450173	-11.1502	2.22137	233.398	0.660724	0.131744	5.01522	5.29725e-07	1.74545e-05	1.58088	-4.75809	0.632561
NM_029735	Eprs	885.617	-1.14199	0.112299	-10.1692	2.72223e-24	6.66506e-22	0.453135	-21.1762	2.20685	1101.76	0.66056	0.107996	6.1165	9.56522e-10	5.59272e-08	1.5807	-7.25238	0.632633
NM_053074	Nup62	215.737	-1.09748	0.140763	-7.79661	6.35937e-15	7.7851e-13	0.467333	-12.1087	2.1398	240.877	1.05999	0.129998	8.15391	3.52353e-16	5.7141e-14	2.08492	-13.2431	0.479635
NM_021461	Mknk1	144.386	-1.09651	0.173923	-6.30455	2.89041e-10	1.87186e-08	0.467648	-7.72773	2.13836	146.883	1.4858	0.168839	8.80006	1.36746e-18	2.86665e-16	2.80072	-15.5426	0.357051
NM_173866	Gpt2	190.635	-1.07292	0.155719	-6.89011	5.57477e-12	4.54973e-10	0.475355	-9.34201	2.10369	208.93	1.11096	0.150806	7.3668	1.74767e-13	2.01325e-11	2.15989	-10.6961	0.462987
NM_016701	Nes	206.126	-1.07242	0.155635	-6.8906	5.55586e-12	4.54973e-10	0.47552	-9.34201	2.10296	220.126	1.23336	0.144825	8.51622	1.64845e-17	3.08009e-15	2.35114	-14.5114	0.425325
NM_010442	Hmox1	55.0697	-1.06457	0.217331	-4.89838	9.66285e-07	3.23088e-05	0.478115	-4.49068	2.09155	68.2669	0.671491	0.202064	3.32316	0.000890034	0.0094094	1.59272	-2.02644	0.627857
NM_172015	Iars	691.209	-1.04235	0.106326	-9.80338	1.08875e-22	2.36103e-20	0.485535	-19.6269	2.05959	860.657	0.576773	0.0999892	5.76835	8.00508e-09	4.09546e-07	1.49151	-6.3877	0.670462
NM_146217	Aars	1269.74	-1.02895	0.103289	-9.96185	2.23848e-23	5.3094e-21	0.490067	-20.275	2.04054	1385.28	1.0899	0.0864907	12.6013	2.07621e-36	1.62227e-33	2.12859	-32.7899	0.469795
NM_013885	Clic4	392.073	-1.02571	0.1224	-8.38	5.29293e-17	8.36944e-15	0.491168	-14.0773	2.03596	410.181	1.27463	0.115145	11.0698	1.75852e-28	8.39692e-26	2.41937	-25.0759	0.413331
NM_023794	Etv5	338.193	-0.994975	0.127566	-7.7997	6.20544e-15	7.7212e-13	0.501745	-12.1123	1.99305	338.724	1.44394	0.130074	11.1009	1.24148e-28	6.2768e-26	2.72063	-25.2023	0.367562
NM_001033302	Gm129	125.262	-0.99334	0.170094	-5.83993	5.22212e-09	2.79126e-07	0.502314	-6.5542	1.99079	137.483	1.02772	0.162436	6.32692	2.501e-10	1.66636e-08	2.0388	-7.77823	0.490484
NM_001045514	Akna	95.4279	-0.992237	0.181889	-5.45517	4.89262e-08	2.29228e-06	0.502698	-5.63973	1.98927	101.573	1.15392	0.174199	6.62414	3.49283e-11	2.83216e-09	2.22518	-8.54788	0.449403
NM_009716	Atf4	950.219	-0.991326	0.0957469	-10.3536	4.02988e-25	1.05141e-22	0.503015	-21.9782	1.98801	1263.86	0.316374	0.0906419	3.49037	0.000482345	0.00579016	1.2452	-2.23731	0.803086
NM_019578	Extl1	73.8064	-0.967098	0.201601	-4.79708	1.60996e-06	5.07038e-05	0.511534	-4.29496	1.9549	80.594	1.03003	0.193255	5.32987	9.82812e-08	4.10061e-06	2.04206	-5.38715	0.489702
NM_010740	Cd93	56.24	-0.935962	0.222793	-4.20103	2.65698e-05	0.000596641	0.522694	-3.22429	1.91317	58.7908	1.16038	0.216115	5.36924	7.90676e-08	3.39793e-06	2.23516	-5.46879	0.447396
NM_001159964	Eps15	38.9862	-0.930695	0.236138	-3.94132	8.1033e-05	0.00158915	0.524605	-2.79884	1.90619	39.6493	1.25771	0.230581	5.45452	4.91055e-08	2.16442e-06	2.39116	-5.66466	0.418207
NM_013805	Cldn5	119.596	-0.878497	0.169413	-5.18554	2.1539e-07	8.23192e-06	0.543934	-5.0845	1.83846	126.181	1.06613	0.163523	6.51971	7.04429e-11	5.50415e-09	2.0938	-8.25931	0.4776
NM_026609	Leprotl1	135.759	-0.878146	0.167029	-5.25743	1.46079e-07	5.95786e-06	0.544066	-5.22491	1.83801	153.146	0.800653	0.156289	5.1229	3.00875e-07	1.04851e-05	1.74189	-4.97943	0.574089
NM_011340	Serpinf1	99.8785	-0.845579	0.177214	-4.7715	1.82856e-06	5.54764e-05	0.556487	-4.25589	1.79699	105.101	1.01595	0.176753	5.74787	9.03765e-09	4.52083e-07	2.02224	-6.34478	0.494502
NM_147776	Vwa1	151.502	-0.843183	0.160006	-5.2697	1.36649e-07	5.65235e-06	0.557413	-5.24777	1.794	159.831	1.03529	0.149996	6.90211	5.12363e-12	4.68485e-10	2.04952	-9.3293	0.487918
NM_001166651	Klhl33	138.644	-0.841261	0.160179	-5.25199	1.50461e-07	6.01053e-06	0.558156	-5.22109	1.79162	133.475	1.42821	0.162541	8.78677	1.53919e-18	3.14983e-16	2.69113	-15.5017	0.371591
NM_183020	Atxn2l	1346.53	-0.830703	0.0955017	-8.6983	3.36889e-18	6.23655e-16	0.562255	-15.2051	1.77855	1504.21	0.785057	0.0889752	8.82332	1.11119e-18	2.38767e-16	1.72316	-15.622	0.580329
NM_027280	Nkd1	39.9597	-0.820942	0.232858	-3.5255	0.000422688	0.00621744	0.566072	-2.20639	1.76656	41.924	1.01877	0.22547	4.51844	6.22964e-06	0.000149983	2.02619	-3.82396	0.493536
NM_009931	Col4a1	423.537	-0.807761	0.113916	-7.09087	1.33275e-12	1.1495e-10	0.571268	-9.93949	1.75049	443.944	1.00934	0.117053	8.62296	6.52431e-18	1.24614e-15	2.01299	-14.9044	0.496774
NM_011299	Rps6ka2	73.0056	-0.791398	0.198552	-3.98585	6.724e-05	0.00133951	0.577784	-2.87306	1.73075	82.1115	0.738047	0.187468	3.93692	8.25353e-05	0.00136159	1.66792	-2.86595	0.59955
NM_025522	Dhrs7	147.011	-0.790191	0.153928	-5.13349	2.84411e-07	1.03783e-05	0.578268	-4.98388	1.7293	159.406	0.851186	0.15012	5.67004	1.42764e-08	6.97193e-07	1.80398	-6.15665	0.554329
NM_001039385	Vgf	90.129	-0.782744	0.204274	-3.83184	0.000127188	0.0022608	0.58126	-2.64574	1.7204	103.358	0.671276	0.188656	3.55821	0.000373395	0.00469887	1.59248	-2.32801	0.627951
NM_008409	Itm2a	139.306	-0.782239	0.160518	-4.87322	1.09792e-06	3.60745e-05	0.581464	-4.4428	1.7198	154.244	0.775456	0.151484	5.11907	3.07044e-07	1.06413e-05	1.71173	-4.97301	0.584204
NM_145967	Vstm2a	52.4231	-0.753865	0.220377	-3.4208	0.000624378	0.00841746	0.593013	-2.07482	1.6863	56.9787	0.818656	0.209105	3.91504	9.03891e-05	0.00145486	1.76376	-2.83718	0.56697
NM_009063	Rgs5	109.435	-0.749004	0.177403	-4.22206	2.42084e-05	0.000550125	0.595014	-3.25954	1.68063	110.613	1.0838	0.178582	6.06889	1.28801e-09	7.38027e-08	2.11961	-7.13193	0.471786
NM_080708	Bmp2k	128.318	-0.743763	0.164974	-4.50837	6.53272e-06	0.000175827	0.59718	-3.75491	1.67454	143.251	0.709038	0.151888	4.66816	3.03914e-06	8.08713e-05	1.63471	-4.09221	0.611728
NM_028782	Lonp1	699.998	-0.707741	0.0993491	-7.12378	1.05004e-12	9.26723e-11	0.612278	-10.0331	1.63324	786.502	0.643103	0.0922378	6.97222	3.11967e-12	2.97929e-10	1.56168	-9.52589	0.640334
NM_026376	Plxnd1	264.073	-0.70623	0.140287	-5.03418	4.79903e-07	1.65567e-05	0.61292	-4.78103	1.63154	298.56	0.63514	0.118349	5.36669	8.01959e-08	3.42927e-06	1.55309	-5.4648	0.643878
NM_001081337	Sipa1l2	463.311	-0.703191	0.135365	-5.19479	2.0495e-07	7.89628e-06	0.614212	-5.10258	1.6281	552.714	0.445723	0.11714	3.80504	0.000141782	0.00211565	1.362	-2.67456	0.734216
NM_028994	Pck2	265.276	-0.697507	0.129397	-5.39044	7.02872e-08	3.13812e-06	0.616637	-5.50333	1.6217	237.319	1.63118	0.135728	12.0181	2.85553e-33	2.04527e-30	3.09767	-29.6892	0.322823
NM_011587	Tie1	133.723	-0.694915	0.166625	-4.17054	3.03879e-05	0.000674398	0.617746	-3.17108	1.61879	146.486	0.737293	0.151579	4.86408	1.14993e-06	3.45582e-05	1.66704	-4.46145	0.599864
NM_133222	Eltd1	87.2708	-0.667741	0.186866	-3.57337	0.000352411	0.00540363	0.629492	-2.26731	1.58858	90.0298	0.907104	0.18034	5.02996	4.90589e-07	1.62804e-05	1.87528	-4.78834	0.533255
NM_007586	Calb2	3145.78	-0.66476	0.112714	-5.89775	3.68494e-09	2.04151e-07	0.630794	-6.69005	1.5853	2898.57	1.47391	0.0838368	17.5807	3.46561e-69	7.44673e-66	2.77773	-65.128	0.360006
NM_145154	Angptl6	88.4801	-0.662351	0.184293	-3.59402	0.000325615	0.00504372	0.631848	-2.29725	1.58266	95.1393	0.742842	0.180855	4.10739	4.00162e-05	0.000718037	1.67347	-3.14385	0.597561
NM_001081395	Amotl1	103.204	-0.643455	0.174787	-3.68137	0.000231985	0.00379475	0.640178	-2.42082	1.56207	115.652	0.602052	0.165094	3.64671	0.000265616	0.00360089	1.51787	-2.44359	0.658816
NM_016750	H2afz	372.991	-0.633016	0.120469	-5.25459	1.48358e-07	5.95786e-06	0.644827	-5.22491	1.5508	421.612	0.541573	0.125306	4.32201	1.54613e-05	0.000328123	1.45556	-3.48396	0.687021
NM_009932	Col4a2	366.012	-0.631596	0.126729	-4.98384	6.23343e-07	2.1408e-05	0.645462	-4.66942	1.54928	376.182	0.904261	0.120324	7.51523	5.68105e-14	7.07662e-12	1.87159	-11.1502	0.534306
NM_177897	B4galnt4	385.047	-0.604084	0.115747	-5.21901	1.79884e-07	7.11103e-06	0.657889	-5.14807	1.52001	431.42	0.552658	0.108012	5.11665	3.11004e-07	1.07353e-05	1.46679	-4.96919	0.681763

## Sheet: Upreg genes incomp down GCN (9)
Figure 3-Source Data 1. Genes that were upregulated in B6J-nmf205-/- vs B6J cerebellum that are incompetely downregulated in the B6J-Nmf205-/-;Gcn2 cerebellum.
		Comparison between B6J and B6J-nmf205-/-									Comparison between B6J and B6J-Gcn2-/-; nmf205-/-
id	name	baseMean	log2foldChange	lfcSE	stat	pval	padj	lfc	mlog10padj	RFC	baseMean	log2foldChange	lfcSE	stat	pval	padj	lfc	mlog10padj	RFC
NM_144907	Sesn2	185.822	-3.12489	0.179119	-17.4459	3.6984e-68	7.01772e-65	0.114634	-64.1538	8.72339	38.4172	-0.908086	0.267085	-3.39999	0.000673893	0.00444666	0.532892	-2.35197	1.87655
NM_009510	Ezr	209.388	-1.72508	0.165296	-10.4363	1.69275e-25	4.94153e-23	0.302481	-22.3061	3.30599	144.276	-1.34836	0.193756	-6.95909	3.42466e-12	1.40263e-10	0.392737	-9.85306	2.54623
NM_180678	Gars	1343.79	-1.42011	0.092347	-15.3779	2.30192e-53	2.91192e-50	0.373685	-49.5358	2.67605	732.042	-0.390389	0.100849	-3.87101	0.000108384	0.000925135	0.762924	-3.03379	1.31075
NM_134137	Lars	400.638	-1.33883	0.127992	-10.4603	1.3149e-25	3.99203e-23	0.395342	-22.3988	2.52945	228.057	-0.441657	0.138599	-3.18657	0.00143969	0.0085023	0.736289	-2.07046	1.35816
NM_146200	Eif3c	1139.46	-1.33001	0.0926108	-14.3613	9.04664e-47	8.583e-44	0.397764	-43.0664	2.51405	769.724	-0.786651	0.0973929	-8.07708	6.6334e-16	4.85883e-14	0.579688	-13.3135	1.72506
NM_134151	Yars	1304.5	-1.25246	0.0882517	-14.1919	1.02776e-45	8.66743e-43	0.419731	-42.0621	2.38248	771.419	-0.375068	0.0938102	-3.99816	6.38381e-05	0.000580006	0.771069	-3.23657	1.2969
NM_029735	Eprs	885.617	-1.14199	0.112299	-10.1692	2.72223e-24	6.66506e-22	0.453135	-21.1762	2.20685	576.143	-0.498961	0.0992948	-5.02505	5.03306e-07	7.75814e-06	0.707616	-5.11024	1.4132
NM_172015	Iars	691.209	-1.04235	0.106326	-9.80338	1.08875e-22	2.36103e-20	0.485535	-19.6269	2.05959	470.406	-0.479208	0.108773	-4.40557	1.05504e-05	0.000119964	0.717371	-3.92095	1.39398
NM_009716	Atf4	950.219	-0.991326	0.0957469	-10.3536	4.02988e-25	1.05141e-22	0.503015	-21.9782	1.98801	727.573	-0.68874	0.0977323	-7.04721	1.82542e-12	7.73471e-11	0.620395	-10.1116	1.61188

## Sheet: Upregul further in GCN2d (21)
Figure 3 -Source Data 1. Genes that were upregulated in B6J-nmf205-/- vs B6J cerebellum that go further up in the B6J-nmf205-/-;Gcn2-/- cerebellum.
		Comparison between B6J and B6J-nmf205-/-									Comparison between B6J-nmf205-/- and B6J-Gcn2-/-; nmf205-/-
id	name	baseMean	log2foldChange	lfcSE	stat	pval	padj	lfc	mlog10padj	RFC	baseMean	log2foldChange	lfcSE	stat	pval	padj	lfc	mlog10padj	RFC
NM_030707	Fcrls	109.155	-1.48401	0.184546	-8.04141	8.88135e-16	1.20374e-13	0.357494	-12.9195	2.79725	266.641	-0.85141	0.135661	-6.276	3.47401e-10	2.15372e-08	0.554243	-7.66681	1.80426
NM_031172	Trim17	53.0113	-1.10412	0.229889	-4.80286	1.56417e-06	4.96737e-05	0.465185	-4.30387	2.14968	159.727	-1.30017	0.157755	-8.24171	1.69769e-16	2.8611e-14	0.406079	-13.5435	2.46258
NM_009780	C4b	150.989	-1.07359	0.170587	-6.29353	3.10334e-10	1.97936e-08	0.475134	-7.70348	2.10467	309.192	-0.682003	0.135281	-5.04138	4.62198e-07	1.54575e-05	0.623299	-4.81086	1.60437
NM_178932	Aoc2	42.0382	-1.06892	0.234938	-4.54981	5.36949e-06	0.000146599	0.476675	-3.83387	2.09786	118.293	-1.14781	0.17038	-6.73677	1.61942e-11	1.40595e-09	0.45131	-8.85203	2.21577
NM_009777	C1qb	86.7532	-1.04882	0.19071	-5.49955	3.80767e-08	1.85258e-06	0.483365	-5.73222	2.06883	172.492	-0.594701	0.151414	-3.92765	8.57814e-05	0.00139375	0.662182	-2.85582	1.51016
NM_010277	Gfap	128.016	-0.985653	0.181752	-5.42308	5.85814e-08	2.71117e-06	0.504997	-5.56684	1.98021	296.305	-0.952502	0.149365	-6.37703	1.80557e-10	1.25152e-08	0.516735	-7.90256	1.93523
NM_007572	C1qa	74.0851	-0.882383	0.200975	-4.39052	1.13082e-05	0.000284203	0.542471	-3.54637	1.84342	148.412	-0.671171	0.167405	-4.00926	6.091e-05	0.00104287	0.627997	-2.98177	1.59236
NM_010422	Hexb	301.456	-0.872313	0.130945	-6.66168	2.7072e-11	1.99492e-09	0.54627	-8.70008	1.8306	578.836	-0.69503	0.106014	-6.55601	5.52664e-11	4.39828e-09	0.617697	-8.35672	1.61892
NM_029078	Pcf11	296.633	-0.776763	0.154029	-5.04297	4.58358e-07	1.58855e-05	0.583675	-4.799	1.71328	612.567	-0.885889	0.112267	-7.8909	3.00025e-15	4.44606e-13	0.541154	-12.352	1.8479
NM_007771	Cry1	282.19	-0.765689	0.137657	-5.56231	2.66229e-08	1.31213e-06	0.588172	-5.88202	1.70018	572.405	-0.864919	0.111908	-7.72885	1.08521e-14	1.50442e-12	0.549077	-11.8226	1.82124
NM_018868	Nop58	81.4596	-0.763272	0.201524	-3.7875	0.000152171	0.00265513	0.589159	-2.57591	1.69734	186.577	-1.03409	0.141425	-7.31197	2.63246e-13	2.9771e-11	0.488323	-10.5262	2.04783
NM_001271397	unknown	131.679	-0.744935	0.170975	-4.35699	1.31863e-05	0.000321813	0.596695	-3.4924	1.6759	254.946	-0.734391	0.143258	-5.12637	2.9538e-07	1.03624e-05	0.601072	-4.98454	1.6637
NM_198606	Dcaf13	60.9737	-0.737683	0.211588	-3.48642	0.00048954	0.00699738	0.599702	-2.15506	1.6675	117.872	-0.667949	0.164393	-4.06312	4.84204e-05	0.000847603	0.629401	-3.07181	1.58881
NM_011150	Lgals3bp	59.4305	-0.719974	0.208154	-3.45886	0.000542466	0.00754592	0.607108	-2.12229	1.64715	118.686	-0.75398	0.162233	-4.64752	3.35941e-06	8.83002e-05	0.592965	-4.05404	1.68644
NM_017373	Nfil3	84.2064	-0.703781	0.191615	-3.67289	0.000239824	0.00388946	0.613961	-2.41011	1.62877	159.263	-0.676466	0.150059	-4.50801	6.54387e-06	0.000156235	0.625696	-3.80622	1.59822
NM_007913	Egr1	198.546	-0.699062	0.151612	-4.61087	4.00988e-06	0.000112306	0.615973	-3.9496	1.62345	333.216	-0.462569	0.131687	-3.51264	0.000443685	0.0054323	0.725693	-2.26502	1.37799
NM_009983	Ctsd	571.93	-0.697323	0.0998098	-6.98652	2.81791e-12	2.35032e-10	0.616715	-9.62887	1.62149	1068.69	-0.753206	0.100372	-7.50418	6.18136e-14	7.57217e-12	0.593284	-11.1208	1.68553
NM_025289	Tbrg1	168.917	-0.672111	0.146752	-4.5799	4.65203e-06	0.000129337	0.627588	-3.88828	1.5934	286.488	-0.513711	0.128348	-4.00248	6.26816e-05	0.001067	0.700418	-2.97184	1.42772
NM_029278	Nop14	171.403	-0.666021	0.152091	-4.37908	1.19179e-05	0.000297556	0.630243	-3.52643	1.58669	340.012	-0.859629	0.123645	-6.95239	3.59143e-12	3.39213e-10	0.551094	-9.46953	1.81457
NM_144523	Zfp622	205.579	-0.647004	0.147805	-4.37741	1.201e-05	0.000298873	0.638605	-3.52451	1.56591	465.772	-1.15014	0.113924	-10.0957	5.77161e-24	1.8373e-21	0.450582	-20.7358	2.21935
NM_177214	Snrnp200	798.553	-0.594972	0.101393	-5.86798	4.41125e-09	2.40873e-07	0.662057	-6.61821	1.51044	1510.63	-0.846691	0.090919	-9.31258	1.2476e-20	3.06374e-18	0.556059	-17.5137	1.79837

## Sheet: Downregulated 205J vs B6J (191)
Figure 3 -Source Data 1. Genes that were downregulated in B6J-nmf205-/- vs B6J cerebellum.
id	name	baseMean	log2foldChange	lfcSE	stat	pval	padj	lfc	mlog10padj	RFC
NM_138582	D17H6S56E-3	47.2687	1.87543	0.231655	8.09578	5.68976e-16	8.14816e-14	3.66911	-13.0889	0.272546
NM_139305	Car9	62.8849	1.70285	0.218146	7.80601	5.90258e-15	7.46677e-13	3.25543	-12.1269	0.307179
NM_021344	Tesc	129.285	1.4313	0.164991	8.67501	4.13519e-18	7.47287e-16	2.6969	-15.1265	0.370797
NM_182840	Emilin3	44.6314	1.2879	0.229622	5.60879	2.03744e-08	1.01073e-06	2.44172	-5.99537	0.409547
NM_175178	Aifm3	571.678	1.27935	0.111902	11.4328	2.86633e-30	1.08777e-27	2.4273	-26.9635	0.411981
NM_022814	Svep1	158.595	1.27838	0.155947	8.19753	2.45373e-16	3.65172e-14	2.42566	-13.4375	0.412259
NM_172619	Adamts10	691.802	1.25861	0.0949111	13.261	3.89906e-40	2.27645e-37	2.39265	-36.6427	0.417946
NM_025685	Col27a1	69.7986	1.24957	0.20558	6.07829	1.21469e-09	7.14687e-08	2.37771	-7.14588	0.420573
NM_145934	Stap2	73.9858	1.21687	0.199026	6.11412	9.70928e-10	5.84378e-08	2.32441	-7.23331	0.430216
NM_207202	Ccdc120	108.219	1.2063	0.178638	6.75276	1.45055e-11	1.11209e-09	2.30746	-8.95386	0.433378
NM_011607	Tnc	144.136	1.1867	0.16516	7.18516	6.713e-13	6.14777e-11	2.27632	-10.2113	0.439306
NM_009893	Chrd	189.655	1.16966	0.157602	7.42158	1.15734e-13	1.20331e-11	2.24958	-10.9196	0.444527
NM_019392	Tyro3	453.209	1.09765	0.105667	10.3878	2.81679e-25	7.63552e-23	2.14007	-22.1172	0.467275
NM_021272	Fabp7	101.92	1.08934	0.189552	5.74692	9.08844e-09	4.6926e-07	2.12777	-6.32859	0.469975
NM_153081	Slc16a11	240.81	1.07855	0.134062	8.04516	8.61353e-16	1.18867e-13	2.11192	-12.9249	0.473503
NM_021546	Necab3	201.104	1.05237	0.143909	7.31273	2.61765e-13	2.48349e-11	2.07394	-10.6049	0.482175
NM_183152	Plk5	129.713	1.04945	0.15996	6.5607	5.35566e-11	3.76384e-09	2.06974	-8.42437	0.483153
NM_183307	Ccdc63	70.6166	1.04336	0.196015	5.32288	1.02139e-07	4.37987e-06	2.06103	-5.35854	0.485195
NM_133733	9030425E11Rik	83.9489	1.03929	0.189351	5.48872	4.0486e-08	1.95725e-06	2.05522	-5.70835	0.486566
NM_019754	Tagln3	885.669	1.02713	0.0894687	11.4803	1.65649e-30	6.61722e-28	2.03797	-27.1793	0.490685
NM_001039198	Zfhx2	533.747	1.00561	0.131644	7.63886	2.19145e-14	2.55894e-12	2.00779	-11.5919	0.498059
NM_001207021	AI848285	215.406	0.998819	0.134389	7.43229	1.0673e-13	1.12511e-11	1.99836	-10.9488	0.500409
NM_197945	Prosapip1	434.417	0.995862	0.117521	8.47391	2.37284e-17	4.09314e-15	1.99427	-14.3879	0.501436
NM_175486	6430571L13Rik	80.8933	0.983341	0.189275	5.19531	2.04381e-07	7.89628e-06	1.97704	-5.10258	0.505807
NM_001199676	Camkk2	101.165	0.975239	0.181203	5.38202	7.36543e-08	3.26922e-06	1.96597	-5.48556	0.508656
NM_175651	Cnpy1	173.613	0.966581	0.160335	6.02852	1.65463e-09	9.58677e-08	1.9542	-7.01833	0.511717
NM_007607	Car4	274.286	0.962398	0.135501	7.10253	1.22494e-12	1.06866e-10	1.94855	-9.97116	0.513203
NM_001013385	Grm4	1671.79	0.954881	0.0965841	9.88653	4.76244e-23	1.06314e-20	1.93842	-19.9734	0.515884
NM_027865	Tmem25	273.87	0.95383	0.123303	7.73568	1.02854e-14	1.23914e-12	1.93701	-11.9069	0.51626
NM_001024139	Adamts15	55.7516	0.952743	0.215358	4.424	9.68915e-06	0.000247612	1.93555	-3.60623	0.516649
NM_178699	B930041F14Rik	114.096	0.927451	0.169802	5.46196	4.70893e-08	2.21992e-06	1.90191	-5.65366	0.525786
NM_177139	Lypd6	46.2757	0.913332	0.227782	4.00967	6.08036e-05	0.00121447	1.88339	-2.91561	0.530958
NM_172924	C230081A13Rik	162.798	0.902227	0.153139	5.89157	3.8255e-09	2.10403e-07	1.86895	-6.67695	0.53506
NM_009782	Cacna1e	773.908	0.898709	0.136739	6.57242	4.95035e-11	3.52428e-09	1.8644	-8.45293	0.536366
NM_175432	Tmem132c	75.4138	0.895171	0.201009	4.4534	8.45229e-06	0.000219702	1.85983	-3.65817	0.537683
NM_183311	Tmem145	407.29	0.891968	0.126313	7.06155	1.64654e-12	1.40418e-10	1.85571	-9.85258	0.538879
NM_013509	Eno2	2606.18	0.890033	0.0802381	11.0924	1.36568e-28	4.93597e-26	1.85322	-25.3066	0.539602
NM_001193305	Mical2	83.1166	0.887269	0.18935	4.68586	2.78789e-06	8.16991e-05	1.84967	-4.08778	0.540637
NM_175750	Plxna4	244.4	0.881797	0.131263	6.7178	1.84483e-11	1.38636e-09	1.84267	-8.85812	0.542691
NM_001195075	Klhl3	80.773	0.881009	0.198151	4.44616	8.74203e-06	0.000226457	1.84166	-3.64501	0.542988
NM_016974	Dbp	160.212	0.878932	0.152853	5.75017	8.91512e-09	4.63464e-07	1.83901	-6.33398	0.54377
NM_009946	Cplx2	611.709	0.87556	0.119249	7.34227	2.1e-13	2.07e-11	1.83472	-10.684	0.545042
NM_001161665	Kif26b	273.843	0.8753	0.13796	6.34459	2.23022e-10	1.45926e-08	1.83439	-7.83587	0.54514
NM_177049	Jph4	462.128	0.875217	0.11956	7.32034	2.47342e-13	2.37636e-11	1.83428	-10.6241	0.545172
NM_001001326	St5	80.1856	0.873174	0.193716	4.5075	6.5596e-06	0.000175927	1.83169	-3.75467	0.545944
NM_008690	Nfkbie	51.0389	0.866612	0.227035	3.81709	0.000135037	0.00238356	1.82338	-2.62277	0.548433
NM_001129787	Igsf9b	115.091	0.86561	0.183125	4.72688	2.28001e-06	6.75988e-05	1.82211	-4.17006	0.548814
NM_145220	Appl2	902.865	0.855488	0.112379	7.61251	2.68829e-14	3.04539e-12	1.80937	-11.5164	0.552679
NM_011993	Dpysl4	609.463	0.848705	0.123973	6.84589	7.60035e-12	6.13688e-10	1.80088	-9.21205	0.555283
NM_026161	C1qtnf4	326.473	0.847128	0.132881	6.37509	1.82853e-10	1.21741e-08	1.79892	-7.91456	0.55589
NM_013832	Rasal1	89.842	0.843851	0.180933	4.6639	3.10272e-06	9.02284e-05	1.79484	-4.04466	0.557154
NM_013866	Zfp385a	399.818	0.835786	0.111949	7.46575	8.28275e-14	8.85437e-12	1.78483	-11.0528	0.560278
NM_133804	Tmem132a	2169.4	0.834942	0.0877432	9.51574	1.80429e-21	3.80405e-19	1.78378	-18.4198	0.560606
NM_001166164	Ccdc74a	123.764	0.832726	0.174943	4.75999	1.93599e-06	5.78511e-05	1.78105	-4.23769	0.561467
NM_175191	Gpr22	104.255	0.831842	0.173939	4.78237	1.73244e-06	5.30211e-05	1.77996	-4.27555	0.561812
NM_023622	Rgl3	131.445	0.823018	0.159979	5.14455	2.68168e-07	9.92876e-06	1.7691	-5.00311	0.565258
NM_019465	Crtam	87.0222	0.822569	0.186051	4.42121	9.8149e-06	0.000249984	1.76855	-3.60209	0.565434
NM_146025	Samd14	310.086	0.820446	0.126871	6.46677	1.00118e-10	6.84593e-09	1.76595	-8.16457	0.566267
NM_001128103	Ano3	50.007	0.81749	0.233601	3.49952	0.000466097	0.00672562	1.76234	-2.17227	0.567428
NM_028417	Ttc9b	242.608	0.815564	0.13309	6.12793	8.90321e-10	5.40603e-08	1.75999	-7.26712	0.568186
NM_010611	Kcnq2	109.791	0.813669	0.170551	4.77084	1.83459e-06	5.54764e-05	1.75768	-4.25589	0.568933
NM_001144855	Ppfia4	1763.43	0.808814	0.101485	7.96983	1.58891e-15	2.07928e-13	1.75177	-12.6821	0.570851
NM_001005424	Gm996	1067.89	0.805791	0.0972527	8.28554	1.17579e-16	1.82127e-14	1.7481	-13.7396	0.572048
NM_011503	Stxbp2	147.502	0.805038	0.155794	5.16731	2.37489e-07	8.92347e-06	1.74719	-5.04947	0.572347
NM_027410	Tecpr1	1056.76	0.803935	0.101695	7.90536	2.67161e-15	3.43687e-13	1.74586	-12.4638	0.572785
NM_001013749	Tmem151b	324.139	0.79721	0.121306	6.57188	4.96835e-11	3.52428e-09	1.73774	-8.45293	0.575461
NM_008712	Nos1	484.604	0.795378	0.125057	6.36013	2.01587e-10	1.33048e-08	1.73553	-7.87599	0.576192
NM_016782	Cntnap1	786.518	0.794238	0.0942896	8.42339	3.65733e-17	6.1687e-15	1.73416	-14.2098	0.576648
NM_019697	Kcnd2	234.04	0.791316	0.148013	5.34626	8.979e-08	3.87219e-06	1.73065	-5.41204	0.577817
NM_198034	Sidt1	82.5507	0.7908	0.194425	4.06737	4.75459e-05	0.000980634	1.73003	-3.00849	0.578024
NM_030240	2900092E17Rik	476.49	0.789479	0.126667	6.23271	4.58435e-10	2.87564e-08	1.72845	-7.54127	0.578553
NM_001110783	Ank1	105.562	0.78331	0.179491	4.36408	1.27661e-05	0.000312565	1.72108	-3.50506	0.581032
NM_009447	Tuba4a	554.917	0.779788	0.102223	7.62832	2.37835e-14	2.7351e-12	1.71688	-11.563	0.582452
NM_027984	Epn3	66.3262	0.775377	0.206799	3.74943	0.000177234	0.00305036	1.71164	-2.51565	0.584236
NM_145579	Mypop	61.9855	0.773789	0.20355	3.80147	0.000143838	0.00252715	1.70975	-2.59737	0.584879
NM_175692	Snhg11	321.974	0.773307	0.129487	5.97208	2.34242e-09	1.33676e-07	1.70918	-6.87395	0.585075
NM_018775	Tbc1d8	217.269	0.771036	0.137	5.62802	1.82292e-08	9.1629e-07	1.7065	-6.03797	0.585996
NM_144816	Rhbdl1	193.877	0.770962	0.146719	5.2547	1.48269e-07	5.95786e-06	1.70641	-5.22491	0.586027
NM_013871	Mapk12	79.8995	0.769331	0.188623	4.07866	4.52957e-05	0.000944491	1.70448	-3.0248	0.586689
NM_009800	Car11	177.018	0.768607	0.142405	5.39732	6.76419e-08	3.07426e-06	1.70362	-5.51226	0.586984
NM_019626	Cbln1	1743.66	0.767713	0.0879293	8.73103	2.52368e-18	4.78869e-16	1.70257	-15.3198	0.587348
NM_001113569	Stxbp1	174.484	0.767592	0.14908	5.14887	2.62059e-07	9.75015e-06	1.70243	-5.01099	0.587397
NM_053272	Dhcr24	233.474	0.762071	0.144409	5.27716	1.31198e-07	5.50161e-06	1.69592	-5.25951	0.589649
NM_011510	Abcc8	300.248	0.759773	0.129526	5.86579	4.47006e-09	2.42341e-07	1.69322	-6.61557	0.590589
NM_024229	Pcyt2	378.973	0.758579	0.124093	6.11299	9.77812e-10	5.84378e-08	1.69182	-7.23331	0.591078
NM_009179	St3gal2	132.335	0.756291	0.157779	4.79335	1.64016e-06	5.12296e-05	1.68914	-4.29048	0.592017
NM_177137	Gnal	54.6014	0.756177	0.213378	3.54383	0.000394361	0.00586903	1.68901	-2.23143	0.592063
NM_023179	Atp6v1g2	380.343	0.75274	0.111415	6.7562	1.4166e-11	1.09714e-09	1.68499	-8.95974	0.593475
NM_177204	Fam40b	49.8811	0.750633	0.222989	3.36623	0.000762018	0.00992062	1.68253	-2.00346	0.594343
NM_007408	Plin2	77.363	0.746333	0.190638	3.91492	9.04355e-05	0.00174035	1.67752	-2.75936	0.596117
NM_028454	Tm7sf2	98.4036	0.746205	0.181513	4.11103	3.93891e-05	0.000846922	1.67737	-3.07216	0.59617
NM_027518	Gpr137c	76.4563	0.743886	0.199117	3.73592	0.000187032	0.00319005	1.67468	-2.4962	0.597129
NM_008979	Ptpn22	135.601	0.740901	0.173041	4.28165	1.85509e-05	0.000431905	1.67122	-3.36461	0.598365
NM_001081332	Slc9a5	185.749	0.739856	0.14551	5.08457	3.68466e-07	1.31838e-05	1.67001	-4.87996	0.598799
NM_008844	Pip5k1c	56.2847	0.739319	0.209381	3.53097	0.000414036	0.00611387	1.66939	-2.21368	0.599022
NM_053195	Slc24a3	287.127	0.738449	0.128067	5.7661	8.11256e-09	4.24651e-07	1.66838	-6.37197	0.599384
NM_008422	Kcnc3	1534.43	0.737424	0.0856178	8.61298	7.11873e-18	1.25654e-15	1.6672	-14.9008	0.599809
NM_021339	Cdon	101.642	0.735891	0.17683	4.16158	3.16056e-05	0.000699378	1.66543	-3.15529	0.600447
NM_026125	Fam132a	53.5009	0.73513	0.214782	3.42268	0.000620072	0.00840419	1.66455	-2.0755	0.600764
NM_175556	Plch2	162.674	0.733332	0.148698	4.93167	8.15289e-07	2.76252e-05	1.66247	-4.55869	0.601513
NM_022980	Rcan3	90.4903	0.732347	0.19811	3.69667	0.000218445	0.00363596	1.66134	-2.43938	0.601924
NM_008429	Kcnj9	176.572	0.731896	0.145074	5.04498	4.5356e-07	1.57914e-05	1.66082	-4.80158	0.602112
NM_177652	Ryr3	129.176	0.729711	0.181748	4.01497	5.94529e-05	0.00119694	1.65831	-2.92193	0.603025
NM_008851	Pitpnm1	1853.23	0.727326	0.0886691	8.20269	2.35057e-16	3.56817e-14	1.65557	-13.4476	0.604023
NM_011322	Scn1b	1816.83	0.723623	0.078558	9.21132	3.22137e-20	6.26929e-18	1.65132	-17.2028	0.605575
NM_175457	Heatr7a	132.507	0.722085	0.166448	4.33819	1.43659e-05	0.000346311	1.64956	-3.46053	0.606221
NM_026805	Svop	216.869	0.721687	0.142633	5.05973	4.19841e-07	1.47528e-05	1.64911	-4.83113	0.606388
NM_027877	Mus81	196.49	0.721601	0.151557	4.76125	1.92395e-06	5.77186e-05	1.64901	-4.23868	0.606424
NM_008846	Pip5k1b	155.871	0.714283	0.160956	4.43774	9.09073e-06	0.000234689	1.64067	-3.62951	0.609508
NM_139302	Sh3glb2	688.913	0.713242	0.0965447	7.38769	1.49405e-13	1.51198e-11	1.63948	-10.8205	0.609948
NM_198610	Igsf21	232.933	0.713054	0.130381	5.46899	4.52609e-08	2.14706e-06	1.63927	-5.66815	0.610027
NM_001167891	Nrg2	54.9724	0.712638	0.210978	3.37778	0.000730745	0.00956268	1.6388	-2.01942	0.610204
NM_145981	Phyhip	1618.36	0.7125	0.0949516	7.50383	6.1982e-14	6.83316e-12	1.63864	-11.1654	0.610262
NM_001081081	Gls	122.824	0.709495	0.167143	4.24484	2.18745e-05	0.000503114	1.63523	-3.29833	0.611534
NM_021567	Pcbp4	383.032	0.708986	0.116154	6.10385	1.03546e-09	6.13996e-08	1.63466	-7.21183	0.61175
NM_007662	Cdh15	175.287	0.706862	0.142957	4.94459	7.63037e-07	2.59706e-05	1.63225	-4.58552	0.612651
NM_001002927	Penk	277.036	0.70479	0.143243	4.92024	8.64382e-07	2.90295e-05	1.62991	-4.53716	0.613532
NM_001034895	Zfr2	183.836	0.701487	0.146578	4.78576	1.70342e-06	5.25567e-05	1.62618	-4.27937	0.614938
NM_001080925	Rapgefl1	161.083	0.699724	0.150234	4.65756	3.19974e-06	9.26948e-05	1.62419	-4.03294	0.61569
NM_001029936	Specc1	536.595	0.698876	0.115913	6.0293	1.64671e-09	9.58677e-08	1.62324	-7.01833	0.616052
NM_001102563	Prrt2	862.456	0.697917	0.103885	6.71817	1.84015e-11	1.38636e-09	1.62216	-8.85812	0.616462
NM_031396	Cnnm1	268.884	0.692807	0.1288	5.37894	7.49261e-08	3.30633e-06	1.61643	-5.48065	0.618649
NM_001164663	9830001H06Rik	1387.44	0.690364	0.123041	5.61086	2.01326e-08	1.00531e-06	1.61369	-5.9977	0.619697
NM_031186	Ndst3	131.168	0.68892	0.170266	4.04615	5.2067e-05	0.00106233	1.61208	-2.97374	0.620318
NM_013589	Ltbp2	159.454	0.687585	0.154345	4.45486	8.39472e-06	0.000218955	1.61059	-3.65965	0.620892
NM_010630	Kifc2	947.401	0.686008	0.0942226	7.28072	3.32047e-13	3.11141e-11	1.60883	-10.507	0.621571
NM_021883	Tmod1	190.595	0.68399	0.151569	4.51274	6.3994e-06	0.000172852	1.60658	-3.76233	0.622441
NM_001114664	Iqsec2	154.164	0.683528	0.150087	4.55421	5.2583e-06	0.000144081	1.60606	-3.84139	0.622641
NM_175414	Tspan9	493.234	0.680846	0.108011	6.30349	2.91013e-10	1.87186e-08	1.60308	-7.72773	0.623799
NM_148946	Slc8a2	798.954	0.674866	0.115547	5.84062	5.20059e-09	2.79126e-07	1.59645	-6.5542	0.62639
NM_026239	Tmem35	114.911	0.667477	0.172687	3.86524	0.000110981	0.00204453	1.58829	-2.68941	0.629607
NM_175482	Usp28	173.85	0.667063	0.15116	4.41295	1.0197e-05	0.000257983	1.58784	-3.58841	0.629787
NM_013636	Ppp1cc	731.253	0.66543	0.0976136	6.81698	9.29733e-12	7.42808e-10	1.58604	-9.12912	0.630501
NM_025569	Mgst3	229.054	0.663304	0.138689	4.78266	1.72988e-06	5.30211e-05	1.58371	-4.27555	0.631431
NM_178702	Radil	105.258	0.662533	0.177842	3.72541	0.000194997	0.00326718	1.58286	-2.48583	0.631768
NM_001033263	Agap2	876.693	0.661029	0.0922588	7.16494	7.78183e-13	6.94871e-11	1.58121	-10.1581	0.632427
NM_011976	Sema4g	353.526	0.660197	0.122965	5.36898	7.91812e-08	3.4342e-06	1.5803	-5.46417	0.632792
NM_001085378	Myh7b	92.4622	0.65982	0.182217	3.62106	0.000293403	0.00461062	1.57989	-2.33624	0.632957
NM_182993	Slc17a7	2020.94	0.658395	0.0898104	7.33094	2.28545e-13	2.22392e-11	1.57833	-10.6529	0.633583
NM_007756	Cplx1	1081.8	0.657377	0.0969557	6.78017	1.20031e-11	9.48999e-10	1.57721	-9.02273	0.63403
NM_001033399	Gfod1	298.232	0.654955	0.121791	5.37771	7.54388e-08	3.30972e-06	1.57457	-5.48021	0.635095
NM_019914	Mllt11	105.492	0.654814	0.170631	3.83761	0.000124237	0.0022345	1.57441	-2.65082	0.635157
NM_174988	Cdh22	413.894	0.653505	0.118347	5.52195	3.35267e-08	1.64173e-06	1.57298	-5.7847	0.635734
NM_001005477	Barhl2	161.74	0.651948	0.158404	4.11572	3.85969e-05	0.000834617	1.57129	-3.07851	0.63642
NM_001164518	Iglon5	158.233	0.64989	0.1494	4.34998	1.36148e-05	0.000330147	1.56905	-3.48129	0.637329
NM_010065	Dnm1	4132.41	0.647097	0.0810283	7.98606	1.39316e-15	1.8551e-13	1.56601	-12.7316	0.638564
NM_008083	Gap43	241.633	0.64677	0.150872	4.28688	1.81199e-05	0.000424475	1.56566	-3.37215	0.638709
NM_177078	Adrbk2	285.896	0.644215	0.132414	4.86514	1.14373e-06	3.72572e-05	1.56289	-4.42879	0.639841
NM_007939	Epha8	227.936	0.641744	0.138581	4.63084	3.64191e-06	0.000102759	1.56021	-3.98818	0.640938
NM_001033342	Cdc42bpg	482.915	0.637563	0.125983	5.06072	4.17669e-07	1.47447e-05	1.5557	-4.83136	0.642798
NM_009616	Adam19	104.042	0.637213	0.184236	3.45868	0.000542829	0.00754592	1.55532	-2.12229	0.642954
NM_033610	Sncb	430.995	0.636962	0.130156	4.89383	9.88947e-07	3.29215e-05	1.55505	-4.48252	0.643065
NM_028841	Tspan17	96.2319	0.636736	0.17739	3.58947	0.000331353	0.00512213	1.55481	-2.29055	0.643167
NM_175528	E330009J07Rik	261.063	0.636012	0.146611	4.33809	1.43726e-05	0.000346311	1.55403	-3.46053	0.643489
NM_025933	Higd2a	99.5095	0.631976	0.182701	3.45907	0.000542054	0.00754592	1.54969	-2.12229	0.645292
NM_019963	Stat2	373.597	0.631709	0.119812	5.27251	1.34567e-07	5.6119e-06	1.5494	-5.25089	0.645412
NM_145128	Mgat5	122.842	0.631258	0.161284	3.91394	9.08011e-05	0.00174035	1.54891	-2.75936	0.645613
NM_009548	Rnf112	1121.44	0.630845	0.106717	5.91139	3.39236e-09	1.89324e-07	1.54847	-6.72279	0.645798
NM_018873	Srcin1	1691.99	0.630555	0.0878916	7.17423	7.27142e-13	6.57024e-11	1.54816	-10.1824	0.645928
NM_001101506	Gm5151	85.7297	0.629741	0.182453	3.45152	0.000557438	0.00770665	1.54729	-2.11313	0.646293
NM_177261	Kndc1	1937.17	0.625739	0.103863	6.02466	1.69466e-09	9.74432e-08	1.543	-7.01125	0.648088
NM_013851	Abca8b	139.918	0.623857	0.162563	3.83763	0.000124226	0.0022345	1.54099	-2.65082	0.648934
NM_011994	Abcd2	132.285	0.62011	0.159992	3.87587	0.000106242	0.00197642	1.53699	-2.70412	0.650621
NM_172283	Fuk	172.489	0.619432	0.151418	4.09088	4.29744e-05	0.000911105	1.53627	-3.04043	0.650927
NM_009451	Tubb4a	1397.65	0.617547	0.107533	5.74288	9.30782e-09	4.7734e-07	1.53426	-6.32117	0.651778
NM_178592	Abhd16a	719.93	0.617402	0.0997826	6.18748	6.11355e-10	3.80343e-08	1.53411	-7.41982	0.651844
NM_009127	Scd1	136.178	0.616055	0.170895	3.60487	0.000312314	0.0048575	1.53268	-2.31359	0.652453
NM_146241	Trhde	121.526	0.614224	0.167977	3.65659	0.000255588	0.00411871	1.53073	-2.38524	0.653281
NM_001001160	Fbxo41	269.131	0.614124	0.126091	4.87048	1.11329e-06	3.64218e-05	1.53063	-4.43864	0.653326
NM_010591	Jun	207.708	0.613917	0.140361	4.37383	1.22084e-05	0.000301829	1.53041	-3.52024	0.65342
NM_013850	Abca7	350.869	0.610141	0.1189	5.13155	2.8737e-07	1.04361e-05	1.52641	-4.98146	0.655133
NM_177819	Fam135b	129.782	0.609766	0.175598	3.47252	0.000515601	0.00730114	1.52601	-2.13661	0.655303
NM_028627	Psd	823.888	0.607875	0.0949068	6.40497	1.50402e-10	1.01924e-08	1.52401	-7.99172	0.656162
NM_010271	Gpd1	429.002	0.607471	0.112996	5.37606	7.61328e-08	3.32097e-06	1.52359	-5.47874	0.656346
NM_134050	Rab15	131.705	0.607258	0.160593	3.78134	0.000155984	0.0027154	1.52336	-2.56617	0.656443
NM_017376	Tef	120.061	0.605836	0.165229	3.66663	0.000245767	0.00397733	1.52186	-2.40041	0.657091
NM_001085521	Tmem90b	214.732	0.605253	0.140764	4.29978	1.70965e-05	0.000408058	1.52125	-3.38928	0.657356
NM_011866	Pde10a	142.738	0.603803	0.172847	3.49328	0.000477131	0.00684579	1.51972	-2.16458	0.658017
NM_028055	Btbd17	171.118	0.602693	0.14882	4.0498	5.12606e-05	0.0010487	1.51855	-2.97935	0.658524
NM_172911	D8Ertd82e	296.433	0.601657	0.134406	4.47641	7.59069e-06	0.000199354	1.51746	-3.70037	0.658997
NM_021877	Hr	373.913	0.599366	0.135385	4.42713	9.54946e-06	0.000244866	1.51505	-3.61107	0.660044
NM_010894	Neurod1	1109.09	0.59936	0.112646	5.32075	1.0334e-07	4.40646e-06	1.51504	-5.35591	0.660047
NM_080553	Itpr3	103.925	0.598951	0.176358	3.39622	0.000683236	0.00904012	1.51461	-2.04383	0.660234
NM_001004173	Sgpp2	103.638	0.598197	0.171949	3.47891	0.000503454	0.00715583	1.51382	-2.14534	0.660579
NM_011103	Prkcd	390.151	0.596825	0.112657	5.29771	1.17263e-07	4.94457e-06	1.51238	-5.30587	0.661208
NM_032543	Rnf123	713.63	0.595765	0.110456	5.39369	6.90236e-08	3.11839e-06	1.51127	-5.50607	0.661693
NM_177235	Bend6	146.612	0.59425	0.169062	3.51498	0.000439794	0.00640698	1.50969	-2.19335	0.662389
NM_009472	Unc5c	178.279	0.591231	0.152831	3.86853	0.000109496	0.00202207	1.50653	-2.6942	0.663776
NM_020271	Pdxp	274.055	0.590501	0.130153	4.53696	5.7072e-06	0.00015526	1.50577	-3.80894	0.664112
NM_013533	Gpr162	684.114	0.586831	0.0986267	5.95002	2.68102e-09	1.50733e-07	1.50194	-6.82179	0.665804
NM_030725	Syt13	273.351	0.585686	0.13725	4.2673	1.97857e-05	0.000457846	1.50075	-3.33928	0.666333

## Sheet: Down genes upreg in Gcn2 (2)
Figure 3 -Source Data 1. Genes that were downregulated in B6J-nmf205-/- vs B6J cerebellum that go up in the B6J-nmf205-/-;Gcn2-/- cerebellum.
		Comparison between B6J and B6J-nmf205-/-									Comparison between B6J-nmf205-/- and B6J-Gcn2-/-; nmf205-/-
id	name	baseMean	log2foldChange	lfcSE	stat	pval	padj	lfc	mlog10padj	RFC	baseMean	log2foldChange	lfcSE	stat	pval	padj	lfc	mlog10padj	RFC
NM_010591	Jun	207.708	0.613917	0.140361	4.37383	1.22084e-05	0.000301829	1.53041	-3.52024	0.65342	218.95	-0.512305	0.136238	-3.76037	0.00016966	0.00245494	0.701101	-2.60996	1.42633
NM_011103	Prkcd	390.151	0.596825	0.112657	5.29771	1.17263e-07	4.94457e-06	1.51238	-5.30587	0.661208	393.139	-0.383684	0.113128	-3.3916	0.000694854	0.00767956	0.766478	-2.11466	1.30467

## Sheet: Down genes further down Gcn(32)
Figure 3 -Source Data 1. Genes that were downregulated in B6J-nmf205-/- vs B6J cerebellum that go further down in the B6J-Nmf205-/-;Gcn2 cerebellum.
		Comparison between B6J and B6J-nmf205-/-									Comparison between B6J-nmf205-/- and B6J-Gcn2-/-; nmf205-/-
id	name	baseMean	log2foldChange	lfcSE	stat	pval	padj	lfc	mlog10padj	RFC	baseMean	log2foldChange	lfcSE	stat	pval	padj	lfc	mlog10padj	RFC
NM_175178	Aifm3	571.678	1.27935	0.111902	11.4328	2.86633e-30	1.08777e-27	2.4273	-26.9635	0.411981	304.126	0.469118	0.130309	3.60004	0.00031817	0.00412469	1.38426	-2.38461	0.722406
NM_172619	Adamts10	691.802	1.25861	0.0949111	13.261	3.89906e-40	2.27645e-37	2.39265	-36.6427	0.417946	389.136	0.367613	0.108243	3.39619	0.000683307	0.0075977	1.29022	-2.11932	0.775064
NM_011607	Tnc	144.136	1.1867	0.16516	7.18516	6.713e-13	6.14777e-11	2.27632	-10.2113	0.439306	65.8454	0.917921	0.203083	4.51992	6.1862e-06	0.000149355	1.88939	-3.82578	0.529271
NM_009893	Chrd	189.655	1.16966	0.157602	7.42158	1.15734e-13	1.20331e-11	2.24958	-10.9196	0.444527	93.5436	0.774577	0.178613	4.33662	1.4469e-05	0.000313253	1.71069	-3.50411	0.58456
NM_001039198	Zfhx2	533.747	1.00561	0.131644	7.63886	2.19145e-14	2.55894e-12	2.00779	-11.5919	0.498059	322.926	0.48198	0.123232	3.91115	9.18589e-05	0.001473	1.39666	-2.8318	0.715994
NM_197945	Prosapip1	434.417	0.995862	0.117521	8.47391	2.37284e-17	4.09314e-15	1.99427	-14.3879	0.501436	269.383	0.439387	0.124309	3.53464	0.000408334	0.00504983	1.35603	-2.29672	0.737448
NM_007607	Car4	274.286	0.962398	0.135501	7.10253	1.22494e-12	1.06866e-10	1.94855	-9.97116	0.513203	144.343	1.02496	0.158661	6.46005	1.04669e-10	7.82287e-09	2.0349	-8.10663	0.491424
NM_183311	Tmem145	407.29	0.891968	0.126313	7.06155	1.64654e-12	1.40418e-10	1.85571	-9.85258	0.538879	244.688	0.701721	0.132041	5.31443	1.06992e-07	4.35826e-06	1.62644	-5.36069	0.614838
NM_013509	Eno2	2606.18	0.890033	0.0802381	11.0924	1.36568e-28	4.93597e-26	1.85322	-25.3066	0.539602	1646.93	0.603683	0.0913971	6.60505	3.97379e-11	3.19203e-09	1.51959	-8.49593	0.658072
NM_001161665	Kif26b	273.843	0.8753	0.13796	6.34459	2.23022e-10	1.45926e-08	1.83439	-7.83587	0.54514	167.859	0.616016	0.163478	3.76818	0.000164442	0.00239555	1.53264	-2.62059	0.65247
NM_177049	Jph4	462.128	0.875217	0.11956	7.32034	2.47342e-13	2.37636e-11	1.83428	-10.6241	0.545172	279.316	0.724031	0.122992	5.8868	3.93738e-09	2.07618e-07	1.65179	-6.68273	0.605403
NM_146025	Samd14	310.086	0.820446	0.126871	6.46677	1.00118e-10	6.84593e-09	1.76595	-8.16457	0.566267	195.086	0.648019	0.139458	4.64671	3.37275e-06	8.83804e-05	1.56702	-4.05364	0.638156
NM_001144855	Ppfia4	1763.43	0.808814	0.101485	7.96983	1.58891e-15	2.07928e-13	1.75177	-12.6821	0.570851	1165.5	0.556878	0.0948932	5.86847	4.39832e-09	2.29113e-07	1.47108	-6.63995	0.679772
NM_001005424	Gm996	1067.89	0.805791	0.0972527	8.28554	1.17579e-16	1.82127e-14	1.7481	-13.7396	0.572048	655.339	0.833067	0.108311	7.69143	1.45496e-14	1.98498e-12	1.78147	-11.7022	0.561335
NM_027410	Tecpr1	1056.76	0.803935	0.101695	7.90536	2.67161e-15	3.43687e-13	1.74586	-12.4638	0.572785	700.602	0.550464	0.104791	5.25295	1.49682e-07	5.79511e-06	1.46456	-5.23694	0.682801
NM_016782	Cntnap1	786.518	0.794238	0.0942896	8.42339	3.65733e-17	6.1687e-15	1.73416	-14.2098	0.576648	452.332	1.12245	0.115001	9.76035	1.6658e-22	4.77252e-20	2.17716	-19.3213	0.459314
NM_019626	Cbln1	1743.66	0.767713	0.0879293	8.73103	2.52368e-18	4.78869e-16	1.70257	-15.3198	0.587348	1061.14	0.950459	0.0968589	9.81282	9.91583e-23	2.93885e-20	1.93249	-19.5318	0.517468
NM_175556	Plch2	162.674	0.733332	0.148698	4.93167	8.15289e-07	2.76252e-05	1.66247	-4.55869	0.601513	104.022	0.676841	0.168331	4.0209	5.79763e-05	0.00100062	1.59864	-2.99973	0.625533
NM_008429	Kcnj9	176.572	0.731896	0.145074	5.04498	4.5356e-07	1.57914e-05	1.66082	-4.80158	0.602112	110.64	0.756765	0.172138	4.39627	1.10128e-05	0.000248438	1.6897	-3.60478	0.591822
NM_008851	Pitpnm1	1853.23	0.727326	0.0886691	8.20269	2.35057e-16	3.56817e-14	1.65557	-13.4476	0.604023	1257.08	0.611265	0.0829833	7.36611	1.75677e-13	2.01325e-11	1.5276	-10.6961	0.654623
NM_027877	Mus81	196.49	0.721601	0.151557	4.76125	1.92395e-06	5.77186e-05	1.64901	-4.23868	0.606424	129.652	0.581369	0.165629	3.51006	0.000448	0.0054659	1.49627	-2.26234	0.668329
NM_139302	Sh3glb2	688.913	0.713242	0.0965447	7.38769	1.49405e-13	1.51198e-11	1.63948	-10.8205	0.609948	489.453	0.457613	0.1053	4.34581	1.38764e-05	0.000304254	1.37327	-3.51676	0.72819
NM_001102563	Prrt2	862.456	0.697917	0.103885	6.71817	1.84015e-11	1.38636e-09	1.62216	-8.85812	0.616462	604.89	0.519985	0.100886	5.15417	2.54761e-07	9.07621e-06	1.43394	-5.0421	0.697379
NM_013589	Ltbp2	159.454	0.687585	0.154345	4.45486	8.39472e-06	0.000218955	1.61059	-3.65965	0.620892	105.13	0.637967	0.169033	3.77422	0.000160507	0.00235019	1.55613	-2.6289	0.642618
NM_010630	Kifc2	947.401	0.686008	0.0942226	7.28072	3.32047e-13	3.11141e-11	1.60883	-10.507	0.621571	658.426	0.573248	0.108741	5.27168	1.35178e-07	5.28117e-06	1.48787	-5.27727	0.672102
NM_001033263	Agap2	876.693	0.661029	0.0922588	7.16494	7.78183e-13	6.94871e-11	1.58121	-10.1581	0.632427	583.895	0.777371	0.0987761	7.87004	3.54539e-15	5.16485e-13	1.71401	-12.2869	0.583429
NM_174988	Cdh22	413.894	0.653505	0.118347	5.52195	3.35267e-08	1.64173e-06	1.57298	-5.7847	0.635734	290.888	0.556735	0.12125	4.59162	4.39826e-06	0.000111185	1.47094	-3.95395	0.679839
NM_001005477	Barhl2	161.74	0.651948	0.158404	4.11572	3.85969e-05	0.000834617	1.57129	-3.07851	0.63642	106.717	0.672267	0.17885	3.75883	0.000170712	0.00246599	1.59358	-2.60801	0.62752
NM_001033342	Cdc42bpg	482.915	0.637563	0.125983	5.06072	4.17669e-07	1.47447e-05	1.5557	-4.83136	0.642798	303.309	0.998639	0.125334	7.9678	1.61527e-15	2.52422e-13	1.99811	-12.5979	0.500472
NM_033610	Sncb	430.995	0.636962	0.130156	4.89383	9.88947e-07	3.29215e-05	1.55505	-4.48252	0.643065	292.317	0.675392	0.145576	4.63946	3.49326e-06	9.0839e-05	1.59703	-4.04173	0.626162
NM_178592	Abhd16a	719.93	0.617402	0.0997826	6.18748	6.11355e-10	3.80343e-08	1.53411	-7.41982	0.651844	503.182	0.653196	0.109972	5.93966	2.85617e-09	1.54395e-07	1.57265	-6.81137	0.63587
NM_028627	Psd	823.888	0.607875	0.0949068	6.40497	1.50402e-10	1.01924e-08	1.52401	-7.99172	0.656162	607.965	0.483287	0.11164	4.32896	1.49816e-05	0.000321023	1.39792	-3.49346	0.715346

## Sheet: Triple mut specific up (580)
Figure 3 -Source Data 1. Genes that were upregulated in the B6J-nmf205-/-;Gcn2-/- cerebellum but not in the B6-nmf205-/- cerebellum.
id	name	baseMean	log2foldChange	lfcSE	stat	pval	padj	lfc	mlog10padj	RFC
NM_008341	Igfbp1	77.3073	-3.23235	0.264422	-12.2242	2.30906e-34	1.28343e-31	0.106406	-30.8916	9.39795
NM_013697	Ttr	4500.13	-3.22673	0.367049	-8.791	1.48229e-18	1.53913e-16	0.106821	-15.8127	9.36142
NM_207242	Npc1l1	64.0913	-2.51292	0.2595	-9.68367	3.5378e-22	5.21653e-20	0.175201	-19.2826	5.70773
NM_031393	Sytl1	34.5277	-2.39331	0.306671	-7.80418	5.98914e-15	3.72312e-13	0.190345	-12.4291	5.25362
NM_001009819	A3galt2	33.1995	-2.31174	0.311382	-7.42411	1.13541e-13	5.79921e-12	0.201418	-11.2366	4.96481
NM_011540	Tcap	18.563	-2.12941	0.34454	-6.18044	6.39236e-10	1.76097e-08	0.228552	-7.75425	4.37538
NM_007403	Adam8	44.4818	-2.10393	0.272323	-7.72586	1.111e-14	6.64421e-13	0.232624	-12.1776	4.29878
NM_013823	Kl	31.0002	-2.06345	0.334878	-6.1618	7.19246e-10	1.95292e-08	0.239244	-7.70932	4.17984
NM_053253	Zmynd10	26.1381	-1.96517	0.321183	-6.11853	9.44402e-10	2.53513e-08	0.256109	-7.596	3.90459
NM_009394	Tnnc2	17.4234	-1.95468	0.347282	-5.62852	1.81767e-08	3.88578e-07	0.257978	-6.41052	3.8763
NM_010821	Mpeg1	44.3312	-1.95328	0.271329	-7.19891	6.06939e-13	2.76538e-11	0.258229	-10.5582	3.87253
NM_007738	Col7a1	209.714	-1.90775	0.172283	-11.0733	1.68975e-28	4.31525e-26	0.266507	-25.365	3.75225
NM_011662	Tyrobp	30.3657	-1.8064	0.300253	-6.01625	1.78504e-09	4.51822e-08	0.285903	-7.34503	3.49768
NM_008509	Lpl	45.9946	-1.77518	0.2628	-6.75489	1.4294e-11	5.33849e-10	0.292157	-9.27258	3.42282
NM_032394	Myo7b	66.6358	-1.74926	0.348294	-5.02235	5.10432e-07	7.85516e-06	0.297455	-5.10484	3.36185
NM_001004140	Ckap2	20.4843	-1.73345	0.333466	-5.19828	2.01138e-07	3.41826e-06	0.300732	-5.46619	3.32522
NM_009377	Th	65.4189	-1.72465	0.236126	-7.30393	2.79489e-13	1.36834e-11	0.302573	-10.8638	3.30499
NM_153408	Neurl3	15.6003	-1.72165	0.356811	-4.82512	1.39918e-06	1.96105e-05	0.303201	-4.70751	3.29814
NM_008479	Lag3	24.7972	-1.68867	0.321081	-5.25932	1.44588e-07	2.55366e-06	0.310214	-5.59284	3.22359
NM_008404	Itgb2	25.0379	-1.63593	0.323294	-5.06019	4.18839e-07	6.59601e-06	0.321763	-5.18072	3.10788
NM_007498	Atf3	17.3558	-1.63076	0.339492	-4.80354	1.55887e-06	2.14719e-05	0.322918	-4.66813	3.09677
NM_010130	Emr1	30.0564	-1.61332	0.300307	-5.37224	7.77663e-08	1.44648e-06	0.326845	-5.83969	3.05955
NM_020516	Slc16a8	16.2091	-1.58868	0.344552	-4.61085	4.01018e-06	5.03885e-05	0.332475	-4.29767	3.00774
NM_010185	Fcer1g	32.1615	-1.56734	0.292997	-5.34934	8.82732e-08	1.6196e-06	0.33743	-5.79059	2.96358
NM_010745	Ly86	20.2342	-1.53676	0.347259	-4.42541	9.6261e-06	0.000110923	0.344658	-3.95498	2.90142
NM_011485	Star	25.9824	-1.51901	0.307731	-4.93618	7.96656e-07	1.17435e-05	0.348924	-4.9302	2.86595
NM_008655	Gadd45b	38.828	-1.50802	0.276178	-5.46033	4.75241e-08	9.3165e-07	0.351592	-6.03075	2.8442
NM_007839	Dhx15	81.5962	-1.4391	0.209119	-6.88173	5.91283e-12	2.29919e-10	0.368796	-9.63842	2.71152
NM_024283	1500015O10Rik	63.5251	-1.42005	0.368044	-3.85837	0.000114147	0.000965041	0.3737	-3.01545	2.67595
NM_007695	Chi3l1	47.8029	-1.4112	0.256276	-5.50656	3.65909e-08	7.29425e-07	0.375999	-6.13702	2.65958
NM_011854	Oasl2	29.4595	-1.40155	0.294424	-4.76032	1.93289e-06	2.62035e-05	0.378522	-4.58164	2.64185
NM_011905	Tlr2	27.2509	-1.39983	0.310823	-4.50362	6.68052e-06	8.03107e-05	0.378974	-4.09523	2.63871
NM_026550	Pak1ip1	105.63	-1.398	0.215136	-6.49822	8.12764e-11	2.6666e-09	0.379454	-8.57404	2.63536
NM_146249	Zfp119b	19.1744	-1.39738	0.342852	-4.07573	4.58695e-05	0.000440468	0.379619	-3.35609	2.63422
NM_080467	Atp6v0a4	18.6663	-1.37848	0.33237	-4.14741	3.36254e-05	0.000336575	0.384625	-3.47292	2.59994
NM_198095	Bst2	48.5297	-1.37263	0.248977	-5.51308	3.5261e-08	7.04399e-07	0.386187	-6.15218	2.58942
NM_001160399	Ccdc112	47.4313	-1.37126	0.262458	-5.22467	1.74464e-07	3.01925e-06	0.386554	-5.5201	2.58696
NM_007504	Atp2a1	19.9315	-1.36197	0.329265	-4.13639	3.52812e-05	0.000350181	0.389051	-3.45571	2.57036
NM_027541	Prpf3	99.0314	-1.35309	0.203792	-6.63957	3.14609e-11	1.12604e-09	0.391453	-8.94845	2.55459
NM_027435	Atad2	69.0491	-1.35012	0.224642	-6.01011	1.85402e-09	4.67163e-08	0.392258	-7.33053	2.54934
NM_013692	Klf10	100.689	-1.34965	0.196158	-6.8804	5.96849e-12	2.31132e-10	0.392388	-9.63614	2.5485
NM_138659	Prpf8	2478.3	-1.33393	0.0935676	-14.2563	4.09435e-46	4.83594e-43	0.396686	-42.3155	2.52089
NM_027452	Lrfn2	51.4308	-1.32688	0.248647	-5.3364	9.48081e-08	1.71617e-06	0.39863	-5.76544	2.50859
NM_013749	Tnfrsf12a	28.6213	-1.31958	0.295134	-4.47112	7.78126e-06	9.20215e-05	0.400652	-4.03611	2.49593
NM_178713	Aldh8a1	15.9382	-1.31654	0.341406	-3.85623	0.000115149	0.000972338	0.401497	-3.01218	2.49068
NM_175770	Taf7	95.7024	-1.31321	0.204211	-6.43063	1.27077e-10	4.02937e-09	0.402425	-8.39476	2.48493
NM_001166067	Slc4a5	29.9026	-1.30476	0.323802	-4.0295	5.58947e-05	0.000520343	0.404788	-3.28371	2.47043
NM_015751	Abce1	284.249	-1.30043	0.135819	-9.5747	1.02153e-21	1.41948e-19	0.406006	-18.8479	2.46302
NM_030557	Mynn	139.99	-1.29742	0.170838	-7.59442	3.09184e-14	1.71852e-12	0.406854	-11.7648	2.45788
NM_021308	Piwil2	20.1363	-1.2903	0.325184	-3.96792	7.25041e-05	0.000646923	0.408865	-3.18915	2.4458
NM_007445	Amh	30.9558	-1.2641	0.28909	-4.37267	1.22738e-05	0.000137901	0.41636	-3.86043	2.40177
NM_015783	Isg15	23.347	-1.25558	0.313107	-4.01006	6.07024e-05	0.000556871	0.418826	-3.25425	2.38763
NM_009778	C3	16.2171	-1.25413	0.345992	-3.62474	0.000289255	0.00212864	0.419247	-2.6719	2.38523
NM_007661	Cdk11b	588.448	-1.24943	0.102519	-12.1873	3.633e-34	1.80675e-31	0.420615	-30.7431	2.37747
NM_146348	Olfr1121	52.6841	-1.24204	0.246239	-5.04407	4.55732e-07	7.10597e-06	0.422773	-5.14838	2.36533
NM_177310	Xpnpep3	18.0136	-1.24144	0.337422	-3.6792	0.00023397	0.00177037	0.422949	-2.75194	2.36435
NM_011240	Ranbp2	1064.31	-1.23942	0.105344	-11.7654	5.88277e-32	2.05875e-29	0.423543	-28.6864	2.36103
NM_026197	Mettl16	67.91	-1.23848	0.220913	-5.60617	2.0685e-08	4.34338e-07	0.42382	-6.36217	2.35949
NM_145585	Thumpd1	89.841	-1.23601	0.199078	-6.20867	5.34357e-10	1.51172e-08	0.424546	-7.82053	2.35546
NM_001081013	Rlf	267.267	-1.22328	0.138677	-8.82109	1.13355e-18	1.21714e-16	0.428308	-15.9147	2.33477
NM_022325	Ctsz	157.617	-1.22142	0.185978	-6.56755	5.11485e-11	1.77034e-09	0.428861	-8.75194	2.33176
NM_033374	Dock2	17.6029	-1.21467	0.337294	-3.60121	0.000316742	0.00230578	0.430873	-2.63718	2.32087
NM_001081171	Lama5	140.729	-1.2121	0.175407	-6.91022	4.83914e-12	1.91745e-10	0.431639	-9.71728	2.31675
NM_178911	Pld4	22.6039	-1.21195	0.313473	-3.86622	0.000110534	0.000939244	0.431683	-3.02722	2.31651
NM_145600	Zfp330	132.8	-1.20938	0.180855	-6.687	2.27791e-11	8.37508e-10	0.432454	-9.07701	2.31238
NM_177707	Stac3	22.2633	-1.20343	0.32922	-3.65538	0.000256801	0.00191365	0.434243	-2.71814	2.30286
NM_021526	Psmd14	278.78	-1.19885	0.13898	-8.62606	6.35045e-18	6.06115e-16	0.435622	-15.2174	2.29557
NM_001167746	Dnahc17	54.7314	-1.19796	0.252807	-4.73863	2.15168e-06	2.88796e-05	0.435892	-4.53941	2.29415
NM_008186	Gtf2h1	195.399	-1.19558	0.153795	-7.77386	7.61313e-15	4.70173e-13	0.436611	-12.3277	2.29037
NM_153553	Npas4	48.51	-1.19444	0.253641	-4.70918	2.4871e-06	3.2868e-05	0.436956	-4.48323	2.28856
NM_012048	Polk	47.5382	-1.19412	0.259927	-4.59407	4.34691e-06	5.4317e-05	0.437052	-4.26506	2.28806
NM_021315	Noc3l	87.6373	-1.19271	0.206564	-5.77406	7.73844e-09	1.78343e-07	0.43748	-6.74874	2.28582
NM_001012324	Ecm2	66.9796	-1.18586	0.219988	-5.39057	7.02336e-08	1.31936e-06	0.439562	-5.87964	2.27499
NM_026483	Mphosph10	48.0117	-1.18554	0.259189	-4.57403	4.78428e-06	5.88628e-05	0.43966	-4.23016	2.27449
NM_207277	A930005I04Rik	21.3992	-1.17807	0.323338	-3.64346	0.000268999	0.00199668	0.441943	-2.69969	2.26274
NM_172407	Cdkn2aip	85.092	-1.17144	0.20758	-5.64333	1.66793e-08	3.59823e-07	0.443978	-6.44391	2.25237
NM_008566	Mcm5	87.0155	-1.16733	0.211717	-5.51364	3.51484e-08	7.03639e-07	0.445245	-6.15265	2.24596
NM_175366	Mex3b	104.738	-1.16121	0.186893	-6.21323	5.19048e-10	1.47282e-08	0.447137	-7.83185	2.23645
NM_008225	Hcls1	14.6972	-1.16083	0.350214	-3.31464	0.000917608	0.00578032	0.447254	-2.23805	2.23586
NM_023065	Ifi30	18.3226	-1.15891	0.33807	-3.428	0.000608039	0.0040546	0.447852	-2.39205	2.23288
NM_008467	Kpna4	217.274	-1.15602	0.145407	-7.95021	1.86189e-15	1.2936e-13	0.44875	-12.8882	2.22841
NM_009186	Tra2b	115.871	-1.15499	0.185351	-6.23134	4.62451e-10	1.32817e-08	0.449071	-7.87674	2.22682
NM_177680	Ythdc1	398.887	-1.15265	0.128094	-8.99844	2.28942e-19	2.60635e-17	0.449798	-16.584	2.22322
NM_175551	Dido1	237.63	-1.15262	0.153576	-7.50521	6.13322e-14	3.2196e-12	0.449807	-11.4922	2.22318
NM_008533	Cd180	26.6276	-1.15218	0.299767	-3.84358	0.000121253	0.00101751	0.449945	-2.99246	2.22249
NM_023799	Mgea5	607.225	-1.14888	0.109088	-10.5317	6.17064e-26	1.2957e-23	0.450975	-22.8875	2.21742
NM_008326	Irgm1	44.2762	-1.1473	0.260337	-4.40698	1.0482e-05	0.00011933	0.451469	-3.92325	2.21499
NM_029967	Adamtsl1	39.5383	-1.14703	0.267041	-4.29532	1.74439e-05	0.000189457	0.451554	-3.72249	2.21457
NM_027213	Med6	96.6626	-1.14643	0.191869	-5.97505	2.30016e-09	5.73461e-08	0.451742	-7.2415	2.21365
NM_007630	Ccnb2	19.4705	-1.14441	0.326939	-3.50038	0.000464603	0.00322797	0.452375	-2.49107	2.21056
NM_198303	Eif5b	440.089	-1.13968	0.112121	-10.1647	2.8491e-24	4.9854e-22	0.45386	-21.3023	2.20332
NM_008842	Pim1	25.7316	-1.12901	0.30273	-3.72943	0.00019191	0.00150361	0.457228	-2.82286	2.18709
NM_027000	Gtpbp4	93.4288	-1.12797	0.205054	-5.50085	3.77954e-08	7.5185e-07	0.457559	-6.12387	2.18551
NM_133904	Acacb	83.0232	-1.12769	0.20958	-5.38071	7.41912e-08	1.38271e-06	0.457648	-5.85927	2.18509
NM_053110	Gpnmb	15.8713	-1.1225	0.341581	-3.28621	0.00101547	0.0063126	0.459296	-2.19979	2.17725
NM_001024806	Cebpz	275.305	-1.11988	0.143373	-7.81098	5.67444e-15	3.59851e-13	0.460132	-12.4439	2.17329
NM_017371	Hpx	19.1427	-1.11472	0.32668	-3.41226	0.000644272	0.00426496	0.461781	-2.37008	2.16553
NM_030175	Hhipl2	14.4174	-1.10809	0.353418	-3.13535	0.0017165	0.0098353	0.463908	-2.00721	2.1556
NM_026456	Tceb1	97.1038	-1.107	0.197615	-5.60178	2.12168e-08	4.43534e-07	0.46426	-6.35307	2.15397
NM_026396	Brix1	148.482	-1.10446	0.174516	-6.32869	2.47252e-10	7.39331e-09	0.465077	-8.13116	2.15018
NM_025380	Eef1e1	42.3958	-1.09844	0.261738	-4.19673	2.70793e-05	0.000280561	0.46702	-3.55197	2.14124
NM_001029982	Sec23ip	309.745	-1.09693	0.126353	-8.68151	3.90541e-18	3.92577e-16	0.467509	-15.4061	2.139
NM_001081431	Zfp498	129.265	-1.09486	0.182189	-6.00947	1.86132e-09	4.67757e-08	0.468182	-7.32998	2.13592
NM_144531	Kazn	95.8212	-1.09169	0.190837	-5.72052	1.06196e-08	2.37222e-07	0.469213	-6.62485	2.13123
NM_009831	Ccng1	138.917	-1.09129	0.173874	-6.27633	3.4665e-10	1.01724e-08	0.469341	-7.99258	2.13065
NM_011121	Plk1	21.2498	-1.08711	0.323346	-3.36205	0.000773658	0.00501392	0.470705	-2.29982	2.12447
NM_008626	Mrc2	90.4232	-1.08572	0.198445	-5.47116	4.47109e-08	8.8199e-07	0.471156	-6.05454	2.12244
NM_009735	B2m	340.993	-1.0825	0.136127	-7.95213	1.83335e-15	1.28321e-13	0.47221	-12.8917	2.1177
NM_170684	Cpne7	18.6109	-1.08109	0.325836	-3.31791	0.000906936	0.00573584	0.47267	-2.2414	2.11564
NM_025680	Ctnnbl1	153.39	-1.07933	0.159548	-6.7649	1.33399e-11	5.02185e-10	0.47325	-9.29914	2.11305
NM_172146	Ppat	27.9653	-1.07718	0.310185	-3.47271	0.000515225	0.00352727	0.473953	-2.45256	2.10991
NM_027592	Taf9	163.347	-1.0767	0.159229	-6.76193	1.36163e-11	5.10556e-10	0.474114	-9.29196	2.1092
NM_008331	Ifit1	23.2874	-1.07648	0.313572	-3.43296	0.00059703	0.00399811	0.474185	-2.39814	2.10888
NM_007790	Smc3	729.14	-1.07436	0.0987048	-10.8846	1.36475e-27	3.07037e-25	0.474881	-24.5128	2.10579
NM_028250	Acbd6	34.6351	-1.0734	0.279473	-3.8408	0.000122632	0.00102544	0.475197	-2.98909	2.10439
NM_001085421	Tspyl5	64.2394	-1.07191	0.22292	-4.80851	1.52063e-06	2.11301e-05	0.475689	-4.6751	2.10221
NM_170786	Cntf	23.862	-1.06996	0.311788	-3.43171	0.000599791	0.00401376	0.476331	-2.39645	2.09938
NM_025465	1810029B16Rik	30.905	-1.06888	0.285381	-3.74544	0.000180081	0.00142392	0.47669	-2.84651	2.0978
NM_026816	Gtf2f2	33.9479	-1.06628	0.281567	-3.78694	0.000152516	0.00123702	0.47755	-2.90762	2.09402
NM_011247	Rbbp6	417.143	-1.06451	0.124282	-8.56529	1.07806e-17	9.88993e-16	0.478135	-15.0048	2.09146
NM_030187	Ak7	29.2076	-1.06288	0.290728	-3.65592	0.000256262	0.00191266	0.478676	-2.71836	2.08909
NM_015786	Hist1h1c	26.9838	-1.06158	0.317222	-3.3465	0.000818392	0.00526053	0.479106	-2.27897	2.08722
NM_026479	Zcchc10	55.0928	-1.06148	0.236061	-4.49663	6.90374e-06	8.26786e-05	0.47914	-4.08261	2.08707
NM_009225	Snrpb	569.168	-1.06003	0.10532	-10.0649	7.89881e-24	1.3094e-21	0.479621	-20.8829	2.08498
NM_175639	Wdr43	125.809	-1.05484	0.170405	-6.19019	6.00906e-10	1.67492e-08	0.48135	-7.77601	2.07749
NM_029888	Zfp142	391.688	-1.05024	0.133061	-7.8929	2.95245e-15	1.97856e-13	0.482889	-12.7037	2.07087
NM_053089	Naa15	207.702	-1.04698	0.145955	-7.17331	7.32043e-13	3.29384e-11	0.48398	-10.4823	2.0662
NM_134063	BC016423	381.854	-1.04665	0.13617	-7.68638	1.51356e-14	8.72053e-13	0.48409	-12.0595	2.06573
NM_001037742	1110034B05Rik	47.4183	-1.04322	0.250545	-4.16379	3.13013e-05	0.000315989	0.485245	-3.50033	2.06082
NM_145706	Nup43	18.476	-1.04284	0.331746	-3.1435	0.00166939	0.00963007	0.48537	-2.01637	2.06029
NM_146153	Thrap3	664.357	-1.04006	0.102226	-10.1742	2.58633e-24	4.66647e-22	0.486306	-21.331	2.05632
NM_011902	Tekt2	33.7141	-1.03958	0.275964	-3.76708	0.000165165	0.00132483	0.486469	-2.87784	2.05563
NM_178610	Krr1	164.06	-1.038	0.159468	-6.50911	7.55997e-11	2.4977e-09	0.487003	-8.60246	2.05337
NM_007759	Crabp2	26.9867	-1.03548	0.297578	-3.47968	0.000502008	0.00345709	0.487854	-2.46129	2.04979
NM_028032	Ppp2r2a	49.5584	-1.03498	0.250441	-4.13263	3.58642e-05	0.000354849	0.488022	-3.44996	2.04909
NM_153806	Dnttip2	89.9076	-1.02766	0.200919	-5.1148	3.14066e-07	5.10729e-06	0.490504	-5.29181	2.03872
NM_029157	Sf3a3	199.111	-1.02433	0.15327	-6.68318	2.33805e-11	8.56287e-10	0.491637	-9.06738	2.03402
NM_009281	Zfp143	73.4665	-1.02264	0.215897	-4.73669	2.17239e-06	2.91162e-05	0.492216	-4.53587	2.03163
NM_053124	Smarca5	427.453	-1.02136	0.132563	-7.70472	1.31129e-14	7.69588e-13	0.492651	-12.1137	2.02983
NM_025816	Tax1bp1	752.89	-1.01667	0.0988773	-10.2822	8.47788e-25	1.57073e-22	0.494254	-21.8039	2.02325
NM_019673	Actl6a	88.3874	-1.01606	0.199616	-5.09008	3.5792e-07	5.73218e-06	0.494464	-5.24168	2.02239
NM_144866	Etf1	141.065	-1.01397	0.164894	-6.14921	7.78683e-10	2.10222e-08	0.495183	-7.67732	2.01946
NM_172939	Sowahc	51.0695	-1.00791	0.247797	-4.06747	4.75267e-05	0.000454075	0.497267	-3.34287	2.01099
NM_001102565	Alkbh1	36.4618	-1.00557	0.269163	-3.73594	0.000187016	0.00147022	0.498072	-2.83262	2.00774
NM_133953	Sf3b3	703.719	-1.0031	0.113833	-8.81196	1.22974e-18	1.3056e-16	0.498928	-15.8842	2.0043
NM_026472	Mki67ip	26.1343	-1.00143	0.302111	-3.31478	0.000917155	0.00578032	0.499504	-2.23805	2.00199
NM_178069	Lsg1	87.1578	-1.00015	0.199258	-5.01938	5.18396e-07	7.96476e-06	0.499947	-5.09883	2.00021
NM_177670	Tmem69	31.6467	-0.999784	0.288761	-3.46232	0.000535538	0.00364312	0.500075	-2.43853	1.9997
NM_011958	Orc4	150.268	-0.998291	0.161731	-6.17255	6.71981e-10	1.84045e-08	0.500593	-7.73508	1.99763
NM_021511	Rrs1	37.4201	-0.995001	0.282036	-3.52792	0.000418834	0.00294461	0.501736	-2.53097	1.99308
NM_177695	Tmc3	26.6143	-0.993871	0.305254	-3.25588	0.00113041	0.00692934	0.502129	-2.15931	1.99152
NM_009558	Zfp51	35.0011	-0.991739	0.283891	-3.49338	0.000476949	0.00330403	0.502871	-2.48096	1.98858
NM_016784	Plrg1	173.714	-0.990153	0.153493	-6.45078	1.11274e-10	3.56416e-09	0.503424	-8.44804	1.9864
NM_016716	Cul3	681.089	-0.990027	0.117147	-8.45118	2.88363e-17	2.45472e-15	0.503468	-14.61	1.98622
NM_145591	Zfp958	69.8912	-0.989748	0.221242	-4.47361	7.69098e-06	9.10678e-05	0.503566	-4.04064	1.98584
NM_025706	Tbc1d15	285.985	-0.982375	0.139989	-7.01752	2.25845e-12	9.44251e-11	0.506146	-10.0249	1.97571
NM_028768	Armc8	64.0799	-0.981522	0.219899	-4.46351	8.06289e-06	9.49953e-05	0.506445	-4.0223	1.97455
NM_026141	Ppil4	151.795	-0.98116	0.166481	-5.89352	3.78064e-09	9.11308e-08	0.506572	-7.04033	1.97405
NM_011018	Sqstm1	1387.43	-0.980867	0.0886465	-11.0649	1.85616e-28	4.61548e-26	0.506675	-25.3358	1.97365
NM_025377	Fam33a	37.1332	-0.9802	0.271419	-3.61139	0.00030456	0.00222911	0.506909	-2.65187	1.97274
NM_133701	Prpf6	464.962	-0.978505	0.111059	-8.81065	1.24419e-18	1.30626e-16	0.507505	-15.884	1.97042
NM_001081392	Mdn1	745.257	-0.977373	0.118394	-8.25527	1.51564e-16	1.19344e-14	0.507904	-13.9232	1.96888
NM_028185	Lsm11	83.3704	-0.975316	0.211023	-4.62184	3.80347e-06	4.79187e-05	0.508629	-4.31949	1.96607
NM_013745	Nufip1	65.6377	-0.975057	0.221512	-4.40182	1.07346e-05	0.00012162	0.50872	-3.91499	1.96572
NM_026276	Aasdhppt	42.8366	-0.973324	0.25538	-3.81128	0.000138249	0.00113396	0.509331	-2.9454	1.96336
NM_016897	Timm23	277.416	-0.973277	0.130304	-7.46927	8.06417e-14	4.20985e-12	0.509348	-11.3757	1.9633
NM_145610	Ppan	173.525	-0.972865	0.156098	-6.2324	4.59349e-10	1.32329e-08	0.509493	-7.87835	1.96274
NM_001081090	Esf1	169.956	-0.972574	0.173177	-5.61606	1.95358e-08	4.14817e-07	0.509596	-6.38214	1.96234
NM_029497	Urb1	130.78	-0.972158	0.169416	-5.73827	9.56461e-09	2.16211e-07	0.509743	-6.66512	1.96177
NM_028276	Utp14a	112.804	-0.970989	0.182085	-5.33262	9.68083e-08	1.74569e-06	0.510156	-5.75803	1.96018
NM_001105557	Zfp938	105.633	-0.970489	0.195479	-4.96468	6.88141e-07	1.0321e-05	0.510333	-4.98628	1.9595
NM_008300	Hspa4	1005.19	-0.968401	0.092702	-10.4464	1.52214e-25	2.99639e-23	0.511072	-22.5234	1.95667
NM_145619	Parp3	32.1306	-0.968266	0.296678	-3.26369	0.00109971	0.00677392	0.51112	-2.16916	1.95649
NM_144835	Heatr1	294.356	-0.967347	0.139841	-6.91747	4.59788e-12	1.84091e-10	0.511446	-9.73497	1.95524
NM_153566	Yrdc	43.2317	-0.962869	0.278943	-3.45185	0.000556755	0.00377413	0.513036	-2.42318	1.94918
NM_009836	Cct3	425.928	-0.96147	0.113144	-8.49774	1.93315e-17	1.73965e-15	0.513533	-14.7595	1.94729
NM_001205231	U2af2	27.0623	-0.961339	0.301048	-3.19331	0.00140654	0.00833254	0.51358	-2.07922	1.94712
NM_172517	Rbbp5	150.767	-0.961177	0.170081	-5.65128	1.59258e-08	3.45939e-07	0.513638	-6.461	1.9469
NM_175158	Utp20	320.699	-0.959829	0.134415	-7.14078	9.28007e-13	4.09754e-11	0.514118	-10.3875	1.94508
NM_009837	Cct4	249.503	-0.959297	0.135418	-7.08396	1.40097e-12	6.10035e-11	0.514307	-10.2146	1.94436
NM_001160222	Pum2	24.8822	-0.959289	0.30317	-3.1642	0.0015551	0.00907048	0.51431	-2.04237	1.94435
NM_001033341	Zfp407	129.465	-0.957938	0.185826	-5.15503	2.53594e-07	4.21867e-06	0.514792	-5.37482	1.94253
NM_146224	Zfp280d	202.314	-0.955996	0.15462	-6.18288	6.29441e-10	1.73906e-08	0.515486	-7.75969	1.93992
NM_025310	Ftsj3	249.621	-0.953209	0.132019	-7.22025	5.18917e-13	2.40355e-11	0.516482	-10.6191	1.93617
NM_008651	Mybl1	27.9964	-0.951388	0.293919	-3.23691	0.00120832	0.00734713	0.517135	-2.13388	1.93373
NM_134139	Wdr74	141.128	-0.949175	0.172015	-5.51797	3.42937e-08	6.8945e-07	0.517929	-6.1615	1.93077
NM_025860	Ddx18	128.7	-0.947345	0.17141	-5.52677	3.26172e-08	6.58546e-07	0.518586	-6.18141	1.92832
NM_197993	Tut1	140.86	-0.943181	0.164321	-5.73985	9.47589e-09	2.14719e-07	0.520085	-6.66813	1.92276
NM_198101	Gmip	53.3215	-0.937678	0.239209	-3.91991	8.8583e-05	0.000772872	0.522072	-3.11189	1.91544
NM_008823	Cfp	66.3685	-0.936357	0.248179	-3.77292	0.00016135	0.00129863	0.522551	-2.88651	1.91369
NM_011879	Ik	522.011	-0.935978	0.105517	-8.87038	7.28945e-19	8.16664e-17	0.522688	-16.088	1.91319
NM_028543	Zfp763	139.206	-0.933842	0.163404	-5.71494	1.0974e-08	2.4456e-07	0.523462	-6.61161	1.91036
NM_133787	Nmd3	104.75	-0.928354	0.192302	-4.82758	1.38204e-06	1.94329e-05	0.525457	-4.71146	1.9031
NM_026374	Ilf2	362.61	-0.922468	0.119309	-7.73177	1.06058e-14	6.38306e-13	0.527606	-12.195	1.89536
NM_026201	Ccar1	362.436	-0.917916	0.11925	-7.69739	1.38877e-14	8.10027e-13	0.529273	-12.0915	1.88938
NM_021556	Mrps30	71.318	-0.915753	0.229799	-3.98502	6.74754e-05	0.000608955	0.530067	-3.21542	1.88655
NM_172699	Foxj3	73.9138	-0.914442	0.220694	-4.14348	3.4208e-05	0.000342044	0.530549	-3.46592	1.88484
NM_175749	Nup153	347.173	-0.909701	0.150242	-6.05492	1.40489e-09	3.64692e-08	0.532296	-7.43807	1.87866
NM_008847	Pip5k1a	193.437	-0.909409	0.156671	-5.80456	6.45343e-09	1.50564e-07	0.532403	-6.82228	1.87828
NM_152810	Cdc5l	219.94	-0.903522	0.145147	-6.22487	4.81948e-10	1.37998e-08	0.53458	-7.86013	1.87063
NM_025936	Rars	232.259	-0.900997	0.137704	-6.543	6.02972e-11	2.03482e-09	0.535517	-8.69147	1.86736
NM_028820	1700017B05Rik	61.1037	-0.899397	0.234723	-3.83173	0.000127244	0.00105827	0.536111	-2.9754	1.86529
NM_026040	Srfbp1	79.3012	-0.898971	0.203604	-4.4153	1.0087e-05	0.000115459	0.536269	-3.93757	1.86474
NM_145393	Ythdf2	160.518	-0.89847	0.165564	-5.42673	5.73948e-08	1.10097e-06	0.536455	-5.95822	1.86409
NM_172824	Ccdc14	34.0448	-0.897335	0.280254	-3.20187	0.00136541	0.00812965	0.536878	-2.08993	1.86262
NM_001005859	Rpl34	614.447	-0.896751	0.118601	-7.56108	3.99738e-14	2.17076e-12	0.537095	-11.6634	1.86187
NM_007991	Fbl	167.432	-0.895733	0.166147	-5.39122	6.99828e-08	1.31727e-06	0.537474	-5.88033	1.86056
NM_025844	Chordc1	234.23	-0.895562	0.140842	-6.35864	2.03542e-10	6.20409e-09	0.537538	-8.20732	1.86033
NM_031249	Cstf2t	308.109	-0.895376	0.126932	-7.05396	1.73896e-12	7.40154e-11	0.537607	-10.1307	1.86009
NM_001162537	9330159F19Rik	120.352	-0.894856	0.192098	-4.65832	3.18801e-06	4.08178e-05	0.537801	-4.38915	1.85942
NM_016714	Nup50	73.2672	-0.89328	0.219856	-4.06302	4.8442e-05	0.00046142	0.538389	-3.3359	1.85739
NM_172253	Twistnb	64.3886	-0.893038	0.224684	-3.97464	7.04855e-05	0.000633097	0.538479	-3.19853	1.85708
NM_008065	Gabpa	66.6011	-0.891952	0.229498	-3.88654	0.000101683	0.000876645	0.538884	-3.05718	1.85569
NM_031403	Dbr1	82.2149	-0.891483	0.201631	-4.42136	9.8081e-06	0.000112883	0.53906	-3.94737	1.85508
NM_134097	Topors	117.247	-0.890691	0.175899	-5.06365	4.11314e-07	6.49917e-06	0.539356	-5.18714	1.85406
NM_001033042	Lrrc14b	77.735	-0.888103	0.208463	-4.26025	2.04203e-05	0.000217043	0.540324	-3.66345	1.85074
NM_172697	Prpf38a	240.786	-0.887477	0.143813	-6.17104	6.78436e-10	1.85276e-08	0.540558	-7.73218	1.84994
NM_026344	Dph2	72.7312	-0.886642	0.215437	-4.11555	3.86263e-05	0.000378218	0.540871	-3.42226	1.84887
NM_027927	Ints12	105.664	-0.886125	0.191451	-4.62848	3.68356e-06	4.65944e-05	0.541065	-4.33167	1.84821
NM_178115	2700050L05Rik	271.049	-0.885819	0.14614	-6.06145	1.34896e-09	3.52109e-08	0.54118	-7.45332	1.84781
NM_138747	Nop2	71.5571	-0.884732	0.213929	-4.13563	3.53978e-05	0.00035097	0.541588	-3.45473	1.84642
NM_024459	Ppp3r1	644.091	-0.884712	0.10884	-8.12853	4.34523e-16	3.25858e-14	0.541596	-13.487	1.8464
NM_025283	Mob4	95.5508	-0.884228	0.195539	-4.52201	6.12542e-06	7.38254e-05	0.541777	-4.13179	1.84578
NM_029947	Prdm8	51.7846	-0.883568	0.23864	-3.70252	0.000213469	0.00163989	0.542025	-2.78519	1.84493
NM_010368	Gusb	98.3406	-0.883127	0.199819	-4.41964	9.88673e-06	0.000113511	0.542191	-3.94496	1.84437
NM_011184	Psma3	411.047	-0.879226	0.129148	-6.8079	9.90359e-12	3.78862e-10	0.543659	-9.42152	1.83939
NM_133801	Gtf2f1	238.839	-0.878787	0.135974	-6.46293	1.02695e-10	3.32316e-09	0.543824	-8.47845	1.83883
NM_026453	Mak16	105.596	-0.878183	0.196891	-4.46025	8.18654e-06	9.59735e-05	0.544052	-4.01785	1.83806
NM_133780	Tpr	1036.04	-0.876484	0.0916319	-9.56527	1.11914e-21	1.53257e-19	0.544693	-18.8146	1.8359
NM_201226	Lrrc47	225.108	-0.87529	0.139868	-6.25799	3.89972e-10	1.1373e-08	0.545144	-7.94413	1.83438
NM_026578	Gar1	35.9888	-0.875081	0.271576	-3.22223	0.00127196	0.00766503	0.545223	-2.11549	1.83411
NM_001007574	A830010M20Rik	363.569	-0.87472	0.120167	-7.2792	3.35814e-13	1.62724e-11	0.54536	-10.7885	1.83365
NM_020560	Mrps31	177.549	-0.874261	0.152791	-5.72195	1.05309e-08	2.35798e-07	0.545533	-6.62746	1.83307
NM_008564	Mcm2	39.7042	-0.869774	0.275431	-3.15786	0.00158931	0.00924718	0.547233	-2.03399	1.82738
NM_021303	Noc2l	479.825	-0.869458	0.107095	-8.11859	4.71643e-16	3.50108e-14	0.547353	-13.4558	1.82698
NM_178668	Pde12	51.3539	-0.868977	0.239532	-3.62781	0.00028584	0.00210679	0.547535	-2.67638	1.82637
NM_028814	2810403A07Rik	94.16	-0.868311	0.20278	-4.28204	1.85186e-05	0.000199524	0.547788	-3.7	1.82552
NM_008799	Pdcd2	93.268	-0.868209	0.195978	-4.43013	9.4177e-06	0.000108654	0.547827	-3.96395	1.8254
NM_001080706	Btaf1	261.208	-0.866432	0.142426	-6.08338	1.17672e-09	3.11453e-08	0.548502	-7.50661	1.82315
NM_023243	Ccnh	52.308	-0.8664	0.258845	-3.34718	0.000816392	0.00525125	0.548514	-2.27974	1.82311
NM_028810	Rnd3	36.5423	-0.866345	0.271229	-3.19415	0.00140246	0.00831877	0.548535	-2.07994	1.82304
NM_172730	C130022K22Rik	173.429	-0.866138	0.154977	-5.58883	2.28602e-08	4.74739e-07	0.548614	-6.32355	1.82278
NM_145573	Mrps35	74.7314	-0.860579	0.21447	-4.01258	6.00592e-05	0.000551556	0.550732	-3.25841	1.81577
NM_007806	Cyba	51.7041	-0.859974	0.239113	-3.59652	0.000322501	0.0023416	0.550962	-2.63049	1.81501
NM_007479	Arf4	270.438	-0.85898	0.140546	-6.11172	9.85628e-10	2.63085e-08	0.551342	-7.5799	1.81376
NM_007690	Chd1	169.961	-0.858038	0.160557	-5.34414	9.08484e-08	1.66362e-06	0.551702	-5.77895	1.81257
NM_011917	Xrn2	233.647	-0.857166	0.140521	-6.0999	1.06138e-09	2.82505e-08	0.552036	-7.54897	1.81148
NM_011277	Rnf2	161.502	-0.856762	0.155299	-5.51686	3.45118e-08	6.92361e-07	0.552191	-6.15967	1.81097
NM_013684	Tbp	44.8055	-0.854529	0.253434	-3.3718	0.00074679	0.00486314	0.553046	-2.31308	1.80817
NM_153547	Gnl3	62.8571	-0.85387	0.237418	-3.59648	0.000322553	0.0023416	0.553298	-2.63049	1.80734
NM_172695	Plaa	197.607	-0.850995	0.147501	-5.7694	7.9556e-09	1.82901e-07	0.554402	-6.73778	1.80374
NM_153063	Zfp472	47.3984	-0.849281	0.246729	-3.44216	0.000577098	0.00388667	0.555061	-2.41042	1.8016
NM_001045486	Zfp180	141.66	-0.848384	0.173164	-4.8993	9.61766e-07	1.39382e-05	0.555406	-4.85579	1.80048
NM_212484	Cnot6	163.088	-0.847293	0.173444	-4.8851	1.03375e-06	1.48811e-05	0.555827	-4.82737	1.79912
NM_133242	Rbm39	565.423	-0.84604	0.115703	-7.31219	2.62827e-13	1.29346e-11	0.55631	-10.8882	1.79756
NM_139236	Nol6	491.888	-0.844398	0.107071	-7.88631	3.11263e-15	2.07121e-13	0.556943	-12.6838	1.79551
NM_145605	Klhdc4	166.85	-0.84295	0.155245	-5.42981	5.64141e-08	1.08566e-06	0.557503	-5.96431	1.79371
NM_019536	Dnahc10	58.8667	-0.842403	0.227481	-3.70318	0.000212913	0.00163695	0.557714	-2.78596	1.79303
NM_027513	Nup205	260.251	-0.840017	0.144447	-5.81538	6.04951e-09	1.41841e-07	0.558637	-6.8482	1.79007
NM_001081345	Chd2	238.177	-0.838452	0.144436	-5.80499	6.43688e-09	1.5055e-07	0.559243	-6.82232	1.78813
NM_133807	Lrrc59	259.144	-0.83734	0.133796	-6.25834	3.89096e-10	1.1373e-08	0.559674	-7.94413	1.78675
NM_201369	N4bp2l2	178.137	-0.836499	0.163327	-5.12162	3.02924e-07	4.95212e-06	0.560001	-5.30521	1.78571
NM_001039522	Leo1	298.32	-0.836348	0.128336	-6.51687	7.17915e-11	2.3802e-09	0.56006	-8.62339	1.78552
NM_011867	Slc26a4	49.917	-0.836233	0.252793	-3.30798	0.000939722	0.00589996	0.560104	-2.22915	1.78538
NM_008388	Eif3e	370.567	-0.835947	0.116375	-7.18322	6.80893e-13	3.07835e-11	0.560215	-10.5117	1.78503
NM_001039474	Tcerg1	394.686	-0.833522	0.115275	-7.23074	4.80357e-13	2.24698e-11	0.561158	-10.6484	1.78203
NM_025942	Ola1	223.029	-0.833117	0.139841	-5.95759	2.55989e-09	6.3155e-08	0.561315	-7.19959	1.78153
NM_019553	Ddx21	91.1531	-0.83241	0.196639	-4.23318	2.30411e-05	0.000242175	0.56159	-3.61587	1.78066
NM_008448	Kif5b	1383.94	-0.830166	0.0935977	-8.86952	7.34643e-19	8.16664e-17	0.562464	-16.088	1.77789
NM_176972	Usp37	83.5802	-0.829774	0.204364	-4.06028	4.90145e-05	0.000465235	0.562618	-3.33233	1.77741
NM_001033441	Alg10b	104.722	-0.823619	0.188103	-4.37856	1.19466e-05	0.000134545	0.565023	-3.87113	1.76984
NM_011484	Stam	281.421	-0.822915	0.128108	-6.42363	1.33067e-10	4.17723e-09	0.565299	-8.37911	1.76898
NM_025824	Bzw1	855.585	-0.820916	0.0968941	-8.47231	2.40584e-17	2.11852e-15	0.566082	-14.674	1.76653
NM_025456	Eapp	95.8824	-0.820542	0.191176	-4.29208	1.77009e-05	0.000191607	0.566229	-3.71759	1.76607
NM_019676	Plcd1	75.6552	-0.820247	0.205537	-3.99074	6.58663e-05	0.000596712	0.566345	-3.22424	1.76571
NM_009297	Supt6h	1007.88	-0.818208	0.09675	-8.45693	2.74503e-17	2.37961e-15	0.567146	-14.6235	1.76321
NM_028151	Skiv2l2	428.318	-0.81505	0.11226	-7.26037	3.86021e-13	1.82376e-11	0.568389	-10.739	1.75936
NM_001004363	Nuak1	147.269	-0.814674	0.181069	-4.49923	6.81987e-06	8.17779e-05	0.568537	-4.08736	1.7589
NM_134077	Rbm26	352.881	-0.813807	0.137418	-5.92214	3.17775e-09	7.75879e-08	0.568879	-7.11021	1.75784
NM_145434	Nr1d1	906.42	-0.8137	0.122443	-6.64555	3.02092e-11	1.08535e-09	0.568921	-8.96443	1.75771
NM_212450	Ctdspl2	87.6262	-0.813259	0.196848	-4.13141	3.60537e-05	0.000356351	0.569095	-3.44812	1.75718
NM_001001892	H2-K1	56.6883	-0.813025	0.24127	-3.36977	0.0007523	0.00489228	0.569187	-2.31049	1.75689
NM_018785	Prpf40a	265.779	-0.812153	0.134619	-6.03297	1.60969e-09	4.09971e-08	0.569531	-7.38725	1.75583
NM_001081340	Setd2	520.191	-0.811638	0.121969	-6.65447	2.84321e-11	1.02933e-09	0.569735	-8.98745	1.7552
NM_010022	Dbt	47.0708	-0.811135	0.255058	-3.1802	0.00147175	0.00865916	0.569933	-2.06252	1.75459
NM_028871	Hnrnpr	219.926	-0.809832	0.138152	-5.86187	4.57671e-09	1.09482e-07	0.570448	-6.96066	1.75301
NM_007566	Birc6	1399.99	-0.80862	0.116199	-6.95892	3.42903e-12	1.40263e-10	0.570928	-9.85306	1.75154
NM_026114	Eif2s1	171.514	-0.805674	0.152056	-5.29855	1.16728e-07	2.085e-06	0.572095	-5.68089	1.74796
NM_027264	Zfp715	196.817	-0.805091	0.143557	-5.60815	2.04503e-08	4.30368e-07	0.572326	-6.36616	1.74726
NM_001199048	Zfp942	47.8228	-0.803695	0.247923	-3.24171	0.00118815	0.00723847	0.57288	-2.14035	1.74557
NM_028097	Tmem68	66.157	-0.802749	0.222685	-3.60487	0.000312312	0.00227528	0.573256	-2.64297	1.74442
NM_025878	Mrps18b	92.4631	-0.802261	0.208761	-3.84296	0.000121558	0.00101917	0.57345	-2.99175	1.74383
NM_153144	Ggnbp2	341.827	-0.79878	0.132099	-6.04681	1.47742e-09	3.82469e-08	0.574835	-7.4174	1.73963
NM_145456	Zswim6	90.346	-0.797883	0.191823	-4.15947	3.18993e-05	0.000321682	0.575193	-3.49257	1.73855
NM_011574	Cirh1a	95.196	-0.797698	0.194172	-4.10821	3.98745e-05	0.000388341	0.575266	-3.41079	1.73833
NM_172713	Sdad1	97.9111	-0.797499	0.189643	-4.20527	2.6077e-05	0.000271367	0.575346	-3.56644	1.73809
NM_019570	Rev1	344.174	-0.796807	0.122874	-6.48476	8.88749e-11	2.89077e-09	0.575622	-8.53899	1.73725
NM_001081214	Pprc1	176.007	-0.796184	0.156345	-5.09247	3.53429e-07	5.67951e-06	0.57587	-5.24569	1.7365
NM_172635	Patl1	125.209	-0.795484	0.180633	-4.40387	1.06334e-05	0.000120764	0.57615	-3.91806	1.73566
NM_001033300	Gmps	234.314	-0.795284	0.142361	-5.58639	2.31837e-08	4.80402e-07	0.57623	-6.3184	1.73542
NM_016856	Cpsf2	225.805	-0.792521	0.1455	-5.44689	5.12585e-08	9.92504e-07	0.577334	-6.00327	1.7321
NM_175552	Wdr3	134.19	-0.791812	0.182613	-4.33601	1.45093e-05	0.000160162	0.577618	-3.79544	1.73125
NM_134010	Nup107	72.6956	-0.791544	0.209474	-3.77871	0.00015764	0.00127311	0.577726	-2.89513	1.73093
NM_029936	Ddx10	101.754	-0.791115	0.199574	-3.96402	7.36966e-05	0.000656686	0.577897	-3.18264	1.73041
NM_145943	BC031781	115.354	-0.79011	0.187285	-4.21875	2.45656e-05	0.000257054	0.5783	-3.58997	1.72921
NM_007638	Cct7	1011.39	-0.789083	0.0916717	-8.60771	7.45377e-18	6.97333e-16	0.578712	-15.1566	1.72798
NM_008565	Mcm4	69.6432	-0.788323	0.214615	-3.67319	0.000239539	0.0018063	0.579017	-2.74321	1.72707
NM_133786	Smc4	94.8779	-0.788014	0.195791	-4.02476	5.70329e-05	0.000528855	0.579141	-3.27666	1.7267
NM_172304	Tex10	96.9901	-0.78631	0.204949	-3.83662	0.000124739	0.00104122	0.579825	-2.98246	1.72466
NM_172429	Smndc1	70.5569	-0.784389	0.211563	-3.70759	0.000209245	0.00161532	0.580598	-2.79174	1.72236
NM_023140	Glrx3	388.06	-0.784161	0.120325	-6.51702	7.17179e-11	2.3802e-09	0.58069	-8.62339	1.72209
NM_009361	Tfdp1	193.024	-0.7837	0.148323	-5.28375	1.26567e-07	2.23957e-06	0.580875	-5.64984	1.72154
NM_012010	Eif2s3x	383.84	-0.783615	0.157364	-4.97964	6.37038e-07	9.66191e-06	0.580909	-5.01494	1.72144
NM_173026	Zbtb11	239.562	-0.783265	0.137576	-5.69334	1.24578e-08	2.73754e-07	0.58105	-6.56264	1.72102
NM_028607	Bloc1s2	72.3524	-0.7826	0.213541	-3.66487	0.000247467	0.00185728	0.581318	-2.73112	1.72023
NM_028074	Ddx42	617.425	-0.78252	0.109455	-7.14923	8.72647e-13	3.87119e-11	0.58135	-10.4122	1.72013
NM_026352	Ppid	267.077	-0.782472	0.12861	-6.08407	1.17168e-09	3.10988e-08	0.58137	-7.50726	1.72008
NM_028339	Tmx1	120.986	-0.782406	0.172655	-4.53163	5.85316e-06	7.0815e-05	0.581396	-4.14987	1.72
NM_026219	Uqcrb	667.43	-0.779742	0.110372	-7.06468	1.6099e-12	6.97794e-11	0.582471	-10.1563	1.71682
NM_022997	Vps35	587.209	-0.778063	0.106719	-7.29077	3.08185e-13	1.50105e-11	0.583149	-10.8236	1.71483
NM_021512	Nup160	150.397	-0.777601	0.167879	-4.63191	3.62316e-06	4.58917e-05	0.583336	-4.33827	1.71428
NM_001100591	Rc3h2	219.044	-0.777447	0.161696	-4.80806	1.52401e-06	2.1146e-05	0.583398	-4.67477	1.71409
NM_025934	Riok2	145.225	-0.777205	0.162659	-4.77812	1.76946e-06	2.42313e-05	0.583496	-4.61562	1.71381
NM_021510	Hnrnph1	925.405	-0.776687	0.0956757	-8.11791	4.7427e-16	3.50108e-14	0.583706	-13.4558	1.71319
NM_181517	Ipo7	735.279	-0.774469	0.102485	-7.55689	4.12805e-14	2.22891e-12	0.584604	-11.6519	1.71056
NM_153167	Dcaf10	71.6206	-0.773269	0.210075	-3.68092	0.000232393	0.00176518	0.58509	-2.75321	1.70914
NM_026054	2810474O19Rik	68.7428	-0.771532	0.215406	-3.58175	0.000341295	0.00244867	0.585795	-2.61107	1.70708
NM_025959	Psmc6	554.34	-0.771244	0.11476	-6.72048	1.81129e-11	6.68548e-10	0.585912	-9.17487	1.70674
NM_025433	Rpl7l1	232.263	-0.770981	0.143106	-5.38747	7.14562e-08	1.33701e-06	0.586019	-5.87387	1.70643
NM_001004468	Tacc2	66.1284	-0.770798	0.225899	-3.41214	0.000644551	0.00426496	0.586093	-2.37008	1.70621
NM_001008421	Nol10	67.154	-0.766492	0.222004	-3.4526	0.000555202	0.00376875	0.587845	-2.4238	1.70113
NM_177721	Ranbp6	187.014	-0.766364	0.158908	-4.82269	1.41632e-06	1.9797e-05	0.587897	-4.7034	1.70098
NM_023773	Mphosph8	291.261	-0.76408	0.129448	-5.90259	3.57843e-09	8.6699e-08	0.588829	-7.06199	1.69829
NM_009702	Aqr	286.024	-0.76364	0.15348	-4.97551	6.50764e-07	9.8385e-06	0.589009	-5.00707	1.69777
NM_001081402	Wdr70	108.796	-0.763136	0.182898	-4.17248	3.01309e-05	0.000308124	0.589214	-3.51127	1.69718
NM_182939	Ppp4r2	134.687	-0.761282	0.191079	-3.98412	6.77297e-05	0.000610666	0.589972	-3.2142	1.695
NM_025825	Appbp2	280.637	-0.761028	0.145671	-5.22429	1.74825e-07	3.01997e-06	0.590076	-5.52	1.6947
NM_024478	Grpel1	157.676	-0.760545	0.158086	-4.81094	1.50221e-06	2.09666e-05	0.590273	-4.67847	1.69413
NM_016723	Uchl3	63.5997	-0.755236	0.225053	-3.35581	0.000791329	0.00510394	0.59245	-2.29209	1.68791
NM_029330	Fpgt	98.9115	-0.755123	0.193017	-3.9122	9.14584e-05	0.000797224	0.592496	-3.09842	1.68778
NM_172722	Naa25	179.363	-0.755047	0.154475	-4.88784	1.01951e-06	1.47073e-05	0.592527	-4.83247	1.68769
NM_001033463	Tatdn2	166.732	-0.753597	0.153519	-4.90883	9.16229e-07	1.33809e-05	0.593123	-4.87351	1.68599
NM_144802	Hnrpll	243.997	-0.752412	0.138102	-5.44822	5.0877e-08	9.8714e-07	0.59361	-6.00562	1.68461
NM_173439	Fbxo45	115.924	-0.751713	0.184148	-4.08212	4.46266e-05	0.000429844	0.593898	-3.36669	1.68379
NM_027748	Taf3	73.4844	-0.751132	0.236491	-3.17616	0.00149239	0.00875334	0.594137	-2.05783	1.68311
NM_025441	Nemf	227.744	-0.750676	0.147117	-5.10258	3.35059e-07	5.40268e-06	0.594325	-5.26739	1.68258
NM_029546	Pwp2	89.9681	-0.749213	0.194311	-3.85573	0.000115384	0.000973448	0.594928	-3.01169	1.68088
NM_001113533	Wtap	136.93	-0.748723	0.180876	-4.13942	3.48181e-05	0.000347409	0.59513	-3.45916	1.68031
NM_011959	Orc5	80.6787	-0.748529	0.204472	-3.66078	0.000251445	0.00188116	0.59521	-2.72558	1.68008
NM_011053	Pdcd11	224.173	-0.748498	0.154405	-4.84764	1.24941e-06	1.76997e-05	0.595223	-4.75204	1.68004
NM_207302	Zranb1	488.177	-0.748404	0.112576	-6.64801	2.97081e-11	1.07142e-09	0.595262	-8.97004	1.67993
NM_033618	Supt16h	382.656	-0.748042	0.12086	-6.18934	6.04177e-10	1.67908e-08	0.595411	-7.77493	1.67951
NM_026045	Prpf18	162.591	-0.746816	0.159889	-4.67085	2.9996e-06	3.86147e-05	0.595917	-4.41325	1.67808
NM_145955	Mcmbp	146.28	-0.746358	0.168452	-4.43068	9.39384e-06	0.000108512	0.596107	-3.96452	1.67755
NM_023750	Zfp84	83.5856	-0.745057	0.224568	-3.31773	0.000907511	0.00573584	0.596644	-2.2414	1.67604
NM_029017	Mrpl47	88.486	-0.743481	0.201233	-3.69463	0.00022021	0.0016821	0.597296	-2.77415	1.67421
NM_134034	Smek2	180.039	-0.743229	0.157951	-4.70544	2.53322e-06	3.3245e-05	0.597401	-4.47827	1.67392
NM_010123	Eif3a	1016.86	-0.742649	0.0930755	-7.979	1.47529e-15	1.05606e-13	0.597641	-12.9763	1.67325
NM_008175	Grn	164.317	-0.741635	0.157575	-4.70654	2.51951e-06	3.32034e-05	0.598061	-4.47882	1.67207
NM_001159507	Grip2	86.872	-0.741498	0.206591	-3.58921	0.000331677	0.00238692	0.598118	-2.62216	1.67191
NM_026934	Zc3h15	273.598	-0.74135	0.137319	-5.39873	6.71135e-08	1.27085e-06	0.598179	-5.8959	1.67174
NM_008675	Nbl1	81.7724	-0.741217	0.215559	-3.43859	0.000584756	0.00393544	0.598234	-2.40501	1.67159
NM_010500	Ier5	82.5811	-0.73994	0.207682	-3.56286	0.000366841	0.00261409	0.598764	-2.58268	1.67011
NM_017397	Ddx20	91.7654	-0.739803	0.191108	-3.87112	0.000108336	0.000925135	0.598821	-3.03379	1.66995
NM_028136	Dhx36	435.551	-0.737536	0.115944	-6.36116	2.00241e-10	6.12323e-09	0.599763	-8.21302	1.66733
NM_033370	Copb1	447.298	-0.736639	0.10919	-6.7464	1.51555e-11	5.61587e-10	0.600136	-9.25058	1.66629
NM_178380	Dhx38	197.066	-0.735211	0.143205	-5.13397	2.8369e-07	4.68634e-06	0.60073	-5.32917	1.66464
NM_013771	Yme1l1	324.415	-0.734729	0.124277	-5.91203	3.37914e-09	8.22925e-08	0.600931	-7.08464	1.66408
NM_010421	Hexa	183.179	-0.734604	0.165033	-4.45126	8.53661e-06	9.95833e-05	0.600983	-4.00181	1.66394
NM_018749	Eif3d	359.82	-0.734603	0.115927	-6.33679	2.34604e-10	7.08235e-09	0.600983	-8.14982	1.66394
NM_009227	Snrpe	101.251	-0.73332	0.197136	-3.71987	0.000199323	0.00154758	0.601518	-2.81035	1.66246
NM_025602	Ccdc59	132.601	-0.733274	0.17152	-4.27514	1.91015e-05	0.00020487	0.601537	-3.68852	1.66241
NM_011997	Casp8ap2	173.582	-0.732835	0.152944	-4.79151	1.65533e-06	2.27343e-05	0.60172	-4.64332	1.6619
NM_025485	Mrps22	61.7449	-0.732773	0.224726	-3.26074	0.00111121	0.00683138	0.601746	-2.16549	1.66183
NM_026375	Ahctf1	469.488	-0.732252	0.125113	-5.85273	4.83578e-09	1.15096e-07	0.601963	-6.93894	1.66123
NM_026083	Zc3h13	298.694	-0.73186	0.13177	-5.55406	2.79106e-08	5.70838e-07	0.602127	-6.24349	1.66078
NM_026057	Zfp422	69.1943	-0.731199	0.216732	-3.37374	0.000741538	0.00483227	0.602403	-2.31585	1.66002
NM_001080977	Rsbn1l	86.479	-0.730902	0.201069	-3.63507	0.000277904	0.0020515	0.602527	-2.68793	1.65968
NM_138599	Tomm70a	464.764	-0.730811	0.111651	-6.54548	5.93032e-11	2.00844e-09	0.602565	-8.69714	1.65957
NM_001005509	Eif2a	67.1867	-0.730005	0.215324	-3.39026	0.000698257	0.00458501	0.602902	-2.33866	1.65864
NM_009360	Tfam	84.9374	-0.72746	0.197459	-3.6841	0.000229509	0.00174947	0.603966	-2.75709	1.65572
NM_001030307	Dkc1	113.742	-0.725747	0.18432	-3.93743	8.23583e-05	0.000723237	0.604684	-3.14072	1.65376
NM_013716	G3bp1	191.912	-0.725125	0.153555	-4.72226	2.33233e-06	3.10397e-05	0.604945	-4.50808	1.65304
NM_008947	Psmc1	525.266	-0.721675	0.11014	-6.55236	5.66362e-11	1.93197e-09	0.606393	-8.714	1.6491
NM_011894	Sh3bp5	519.688	-0.720227	0.11972	-6.01595	1.78835e-09	4.51822e-08	0.607002	-7.34503	1.64744
NM_018779	Pde3a	73.2301	-0.718155	0.221268	-3.24563	0.0011719	0.00715328	0.607874	-2.14549	1.64508
NM_145997	Kdm5a	272.65	-0.717989	0.135549	-5.29691	1.17781e-07	2.09983e-06	0.607944	-5.67782	1.64489
NM_175270	Sowahb	137.584	-0.717536	0.197983	-3.62422	0.000289834	0.00213124	0.608135	-2.67137	1.64437
NM_011755	Zfp35	155.663	-0.71738	0.161253	-4.44879	8.6355e-06	0.000100608	0.608201	-3.99737	1.64419
NM_025431	Llph	110.209	-0.717211	0.211766	-3.38681	0.000707112	0.00463993	0.608272	-2.33349	1.644
NM_001081061	Bdp1	257.145	-0.716177	0.137022	-5.22673	1.72535e-07	2.99135e-06	0.608708	-5.52413	1.64282
NM_026119	Med4	103.219	-0.715195	0.189697	-3.77019	0.000163125	0.00130957	0.609123	-2.88287	1.6417
NM_001081152	Npat	141.77	-0.713567	0.16982	-4.20191	2.64674e-05	0.000275127	0.609811	-3.56047	1.63985
NM_007993	Fbn1	93.4289	-0.712686	0.206787	-3.44647	0.000567961	0.00383722	0.610183	-2.41598	1.63885
NM_011968	Psma6	215.748	-0.712598	0.149834	-4.75592	1.97548e-06	2.67425e-05	0.61022	-4.5728	1.63875
NM_024454	Rab21	177.829	-0.708948	0.157223	-4.50918	6.50775e-06	7.83334e-05	0.611766	-4.10605	1.63461
NM_144873	Uhrf2	149.922	-0.708405	0.166852	-4.2457	2.17914e-05	0.000230321	0.611997	-3.63767	1.634
NM_013663	Srsf3	319.739	-0.70761	0.124106	-5.70167	1.1864e-08	2.61922e-07	0.612334	-6.58183	1.6331
NM_145958	Kbtbd2	222.15	-0.705615	0.136698	-5.16184	2.44535e-07	4.08904e-06	0.613181	-5.38838	1.63084
NM_028127	Frmd6	79.7117	-0.702456	0.201884	-3.47951	0.000502337	0.00345709	0.614525	-2.46129	1.62727
NM_207541	Zfp81	87.8788	-0.70225	0.198274	-3.54181	0.000397392	0.00280221	0.614613	-2.5525	1.62704
NM_009408	Top1	270.13	-0.701879	0.13275	-5.28723	1.24184e-07	2.20223e-06	0.614771	-5.65714	1.62662
NM_145952	Tbc1d12	90.6371	-0.699623	0.193151	-3.62216	0.000292152	0.00214494	0.615733	-2.66858	1.62408
NM_026890	Ngdn	124.299	-0.698701	0.170172	-4.10585	4.02837e-05	0.000391606	0.616127	-3.40715	1.62304
NM_011432	Snrpc	76.71	-0.69852	0.207635	-3.36418	0.000767712	0.0049788	0.616204	-2.30288	1.62284
NM_011086	Pikfyve	196.739	-0.696915	0.159571	-4.36744	1.25713e-05	0.000140909	0.61689	-3.85106	1.62103
NM_173753	Fnip1	307.742	-0.694978	0.141757	-4.9026	9.45776e-07	1.37275e-05	0.617719	-4.86241	1.61886
NM_008229	Hdac2	297.746	-0.694902	0.128787	-5.39575	6.82378e-08	1.28956e-06	0.617751	-5.88956	1.61877
NM_173382	2810046L04Rik	136.701	-0.694749	0.182151	-3.81413	0.000136662	0.00112191	0.617817	-2.95004	1.6186
NM_021535	Smu1	342.672	-0.693902	0.118757	-5.84304	5.12569e-09	1.21385e-07	0.61818	-6.91583	1.61765
NM_177296	Tnpo3	408.088	-0.693574	0.114243	-6.07105	1.27079e-09	3.34476e-08	0.61832	-7.47564	1.61729
NM_138667	Tab2	255.513	-0.693547	0.13961	-4.96775	6.77348e-07	1.01753e-05	0.618332	-4.99245	1.61725
NM_019772	1110004F10Rik	269.873	-0.6929	0.12864	-5.38634	7.19068e-08	1.34278e-06	0.618609	-5.87199	1.61653
NM_008188	Thumpd3	80.6313	-0.69057	0.201985	-3.41892	0.000628692	0.00418052	0.619609	-2.37877	1.61392
NM_001003893	Masp2	93.547	-0.689665	0.194695	-3.54228	0.000396677	0.00279925	0.619998	-2.55296	1.61291
NM_153053	Sf3b4	117.911	-0.689629	0.176748	-3.90176	9.54941e-05	0.000830105	0.620013	-3.08087	1.61287
NM_152812	Otud6b	259.839	-0.689624	0.130429	-5.28736	1.24092e-07	2.20223e-06	0.620015	-5.65714	1.61286
NM_172593	Mier3	98.3367	-0.687488	0.190511	-3.60864	0.000307805	0.00224764	0.620934	-2.64827	1.61048
NM_013559	Hsph1	492.649	-0.687158	0.107419	-6.39699	1.58474e-10	4.92573e-09	0.621076	-8.30753	1.61011
NM_144860	Mib1	433.877	-0.686358	0.135367	-5.07034	3.97096e-07	6.29558e-06	0.621421	-5.20096	1.60922
NM_019745	Pdcd10	151.516	-0.686228	0.160998	-4.26234	2.02293e-05	0.000215498	0.621477	-3.66656	1.60907
NM_007466	Api5	379.759	-0.685395	0.121593	-5.63678	1.73261e-08	3.72077e-07	0.621835	-6.42937	1.60814
NM_021335	Snrpb2	116.056	-0.685186	0.17588	-3.89576	9.78931e-05	0.000849396	0.621925	-3.07089	1.60791
NM_001163818	Ppp1r10	297.33	-0.68441	0.124973	-5.47648	4.33874e-08	8.5947e-07	0.62226	-6.06577	1.60704
NM_033560	Vps37a	108.303	-0.683017	0.17867	-3.82278	0.000131957	0.00108693	0.622861	-2.9638	1.60549
NM_138585	Cherp	261.258	-0.682969	0.137615	-4.9629	6.94477e-07	1.03961e-05	0.622882	-4.98313	1.60544
NM_001004436	Wapal	196.838	-0.682902	0.153319	-4.45412	8.42392e-06	9.85119e-05	0.622911	-4.00651	1.60537
NM_054089	Tgs1	118.311	-0.68231	0.174868	-3.90186	9.54556e-05	0.000830105	0.623167	-3.08087	1.60471
NM_008143	Gnb2l1	489.801	-0.680172	0.10815	-6.28918	3.19141e-10	9.39428e-09	0.624091	-8.02714	1.60233
NM_175318	Spty2d1	90.9962	-0.678753	0.199877	-3.39586	0.000684141	0.00450484	0.624705	-2.34632	1.60076
NM_011801	Cfdp1	280.122	-0.678083	0.142625	-4.75431	1.99121e-06	2.6917e-05	0.624995	-4.56997	1.60001
NM_080848	Wdr5	136.422	-0.677755	0.162585	-4.16862	3.06455e-05	0.000311365	0.625137	-3.50673	1.59965
NM_025645	Snrnp40	124.202	-0.676638	0.176967	-3.82354	0.00013155	0.00108466	0.625621	-2.96471	1.59841
NM_001039214	Mex3c	180.225	-0.676564	0.165638	-4.0846	4.41534e-05	0.00042572	0.625654	-3.37088	1.59833
NM_027159	Ccdc115	123.354	-0.674198	0.170471	-3.95491	7.65639e-05	0.000678661	0.626681	-3.16835	1.59571
NM_145991	Cdc73	86.7853	-0.673853	0.195362	-3.44925	0.000562139	0.00380763	0.62683	-2.41934	1.59533
NM_008568	Mcm7	82.0813	-0.673421	0.207548	-3.24465	0.00117593	0.00717326	0.627018	-2.14428	1.59485
NM_181854	Zfp828	101.608	-0.673198	0.189185	-3.5584	0.000373115	0.00264835	0.627115	-2.57703	1.5946
NM_013889	Zfp292	294.606	-0.672044	0.142076	-4.73018	2.24322e-06	2.99381e-05	0.627617	-4.52378	1.59333
NM_025894	Psmd12	308.327	-0.669043	0.130611	-5.1224	3.01664e-07	4.94251e-06	0.628924	-5.30605	1.59002
NM_145139	Eif3l	389.365	-0.668395	0.116026	-5.76075	8.37395e-09	1.91587e-07	0.629207	-6.71763	1.5893
NM_133993	Pwp1	129.059	-0.667549	0.174782	-3.81933	0.000133814	0.00110044	0.629575	-2.95843	1.58837
NM_026155	Ssr3	160.031	-0.665741	0.160842	-4.13909	3.48682e-05	0.000347541	0.630365	-3.45899	1.58638
NM_173761	Ythdf1	249.175	-0.663997	0.145335	-4.56873	4.90691e-06	6.01366e-05	0.631127	-4.22086	1.58447
NM_145422	D10Wsu52e	414.329	-0.663357	0.113991	-5.81937	5.90698e-09	1.3919e-07	0.631408	-6.85639	1.58376
NM_025279	Hnrnpk	1534.51	-0.662261	0.0830346	-7.97572	1.51495e-15	1.0763e-13	0.631887	-12.9681	1.58256
NM_028986	Gzf1	126.822	-0.662172	0.171623	-3.85829	0.000114183	0.000965041	0.631926	-3.01545	1.58246
NM_033583	Pcdhgc5	75.9532	-0.660474	0.208944	-3.16101	0.00157225	0.00915932	0.63267	-2.03814	1.5806
NM_023363	Zfp788	117.808	-0.657725	0.175766	-3.74204	0.000182531	0.00143968	0.633877	-2.84174	1.57759
NM_022979	Nup98	118.572	-0.657137	0.179475	-3.66144	0.000250797	0.00187861	0.634136	-2.72616	1.57695
NM_009080	Rpl26	507.982	-0.65414	0.125059	-5.23065	1.68915e-07	2.93396e-06	0.635454	-5.53255	1.57368
NM_001005525	Rsrc2	224.369	-0.652531	0.142586	-4.57638	4.73081e-06	5.8357e-05	0.636163	-4.23391	1.57192
NM_001081080	Phf3	618.969	-0.652306	0.116568	-5.59594	2.19431e-08	4.56698e-07	0.636262	-6.34037	1.57168
NM_010897	Nf1	462.612	-0.651382	0.127708	-5.10057	3.38638e-07	5.4511e-06	0.63667	-5.26352	1.57067
NM_007715	Clock	174.102	-0.651314	0.159195	-4.09128	4.28993e-05	0.000414473	0.6367	-3.3825	1.5706
NM_172277	Snx8	119.116	-0.650057	0.192375	-3.37911	0.000727197	0.00475851	0.637255	-2.32253	1.56923
NM_001033276	Mll2	1377.47	-0.649905	0.186364	-3.48728	0.000487955	0.00337532	0.637322	-2.47168	1.56907
NM_011588	Trim28	1001.17	-0.647457	0.0912385	-7.09632	1.28126e-12	5.60491e-11	0.638405	-10.2514	1.5664
NM_008682	Nedd1	122.868	-0.646603	0.179901	-3.59422	0.000325368	0.00235046	0.638783	-2.62885	1.56548
NM_178619	1810026J23Rik	132.931	-0.644458	0.168042	-3.83511	0.000125509	0.00104672	0.639733	-2.98017	1.56315
NM_001190401	Usp34	1240.09	-0.644278	0.100954	-6.3819	1.74906e-10	5.41863e-09	0.639813	-8.26611	1.56296
NM_198246	Yars2	97.609	-0.644137	0.195889	-3.28827	0.00100804	0.0062788	0.639876	-2.20212	1.5628
NM_008465	Kpna1	265.854	-0.64348	0.130688	-4.92378	8.48868e-07	1.24549e-05	0.640167	-4.90466	1.56209
NM_145483	Zfp160	118.359	-0.642072	0.178026	-3.60662	0.000310216	0.0022635	0.640792	-2.64522	1.56057
NM_133869	Cept1	88.2245	-0.641775	0.194081	-3.30675	0.000943864	0.00591417	0.640924	-2.22811	1.56025
NM_001081086	Ppig	154.896	-0.641751	0.157967	-4.06257	4.85356e-05	0.000461846	0.640934	-3.3355	1.56022
NM_016980	Rpl5	937.708	-0.641738	0.0994199	-6.45482	1.08346e-10	3.49405e-09	0.64094	-8.45667	1.56021
NM_030147	Brd8	418.865	-0.640094	0.118657	-5.39451	6.87116e-08	1.29592e-06	0.641671	-5.88742	1.55843
NM_001081068	Ltn1	344.233	-0.639263	0.119646	-5.34294	9.1452e-08	1.6682e-06	0.642041	-5.77775	1.55753
NM_031179	Sf3b1	1631.86	-0.63722	0.0902348	-7.06179	1.64367e-12	7.09179e-11	0.642951	-10.1492	1.55533
NM_177325	Tsr1	238.176	-0.635938	0.138694	-4.58518	4.53603e-06	5.6248e-05	0.643522	-4.24989	1.55395
NM_009148	Exoc4	298.09	-0.635371	0.133185	-4.77059	1.83684e-06	2.51176e-05	0.643775	-4.60002	1.55334
NM_019710	Smc1a	741.61	-0.631168	0.101949	-6.19105	5.97643e-10	1.67075e-08	0.645653	-7.77709	1.54882
NM_026454	Ube2f	100.205	-0.629758	0.182684	-3.44725	0.000566323	0.00383323	0.646285	-2.41644	1.5473
NM_016686	Vezf1	150.523	-0.628519	0.161592	-3.88954	0.000100435	0.000867466	0.64684	-3.06175	1.54598
NM_177038	Trappc8	357.138	-0.628483	0.120974	-5.19521	2.04486e-07	3.46892e-06	0.646856	-5.45981	1.54594
NM_001037859	Csf1r	178.256	-0.627945	0.150243	-4.17954	2.92101e-05	0.000299681	0.647098	-3.52334	1.54536
NM_178392	Snapc1	123.06	-0.627894	0.170985	-3.67221	0.000240461	0.00181045	0.64712	-2.74221	1.54531
NM_011672	Ufd1l	200.209	-0.627613	0.146416	-4.28652	1.81495e-05	0.00019612	0.647246	-3.70748	1.54501
NM_019715	Kcmf1	290.881	-0.627427	0.127793	-4.90973	9.1203e-07	1.33402e-05	0.64733	-4.87484	1.54481
NM_027892	Ppp1r12a	344.342	-0.626926	0.135686	-4.62041	3.82989e-06	4.81873e-05	0.647555	-4.31707	1.54427
NM_009939	Cops2	224.508	-0.626626	0.146766	-4.26955	1.95865e-05	0.000209359	0.64769	-3.67911	1.54395
NM_026482	Atp2b1	1070.23	-0.625743	0.090832	-6.88902	5.61774e-12	2.19347e-10	0.648086	-9.65887	1.54301
NM_025699	3230401D17Rik	88.4739	-0.625342	0.193639	-3.22942	0.00124043	0.00751335	0.648266	-2.12417	1.54258
NM_009031	Rbbp7	320.134	-0.623793	0.127936	-4.87583	1.08353e-06	1.5489e-05	0.648963	-4.80998	1.54092
NM_008408	Stt3a	118.018	-0.62341	0.172715	-3.60948	0.000306811	0.00224211	0.649135	-2.64934	1.54051
NM_183225	Usp24	735.926	-0.623179	0.107158	-5.8155	6.04542e-09	1.41841e-07	0.649239	-6.8482	1.54027
NM_026417	Yipf4	161.579	-0.62295	0.153736	-4.05207	5.07671e-05	0.00048066	0.649342	-3.31816	1.54002
NM_172086	Rpl32	117.52	-0.622907	0.193339	-3.22185	0.00127368	0.00767046	0.649361	-2.11518	1.53998
NM_153798	Polr2b	432.495	-0.622525	0.112111	-5.55276	2.81202e-08	5.73883e-07	0.649533	-6.24118	1.53957
NM_001081118	Phrf1	386.516	-0.618895	0.12351	-5.01089	5.41782e-07	8.29707e-06	0.65117	-5.08108	1.5357
NM_080558	Ssfa2	354.385	-0.618402	0.124126	-4.98205	6.29132e-07	9.55734e-06	0.651392	-5.01966	1.53517
NM_009071	Rock1	147.557	-0.617897	0.18843	-3.27918	0.00104107	0.00645056	0.65162	-2.1904	1.53464
NM_026377	Sfr1	148.394	-0.617885	0.163208	-3.78587	0.000153172	0.00124127	0.651626	-2.90613	1.53462
NM_009455	Ube2e1	123.62	-0.617196	0.178545	-3.45681	0.000546606	0.00371307	0.651937	-2.43027	1.53389
NM_025948	Lsm14a	365.227	-0.616338	0.126	-4.89156	1.00038e-06	1.44535e-05	0.652325	-4.84003	1.53298
NM_007428	Agt	697.597	-0.615941	0.124714	-4.93883	7.85909e-07	1.16396e-05	0.652504	-4.93406	1.53256
NM_026474	Sugt1	162.923	-0.613824	0.152457	-4.02622	5.66818e-05	0.000526634	0.653463	-3.27849	1.53031
NM_001003915	Slc5a12	140.827	-0.613077	0.164467	-3.72766	0.000193264	0.00150918	0.653801	-2.82126	1.52952
NM_133826	Atp6v1h	344.581	-0.612815	0.127443	-4.80852	1.5205e-06	2.11301e-05	0.65392	-4.6751	1.52924
NM_009840	Cct8	757.916	-0.611301	0.0999056	-6.11879	9.42882e-10	2.53513e-08	0.654606	-7.596	1.52764
NM_175028	Adnp2	164.868	-0.610101	0.156831	-3.89017	0.000100174	0.00086601	0.655151	-3.06248	1.52637
NM_027994	Cand1	482.583	-0.609714	0.113924	-5.35191	8.70287e-08	1.59987e-06	0.655327	-5.79591	1.52596
NM_134156	Actn1	201.819	-0.607361	0.144345	-4.20772	2.57959e-05	0.00026963	0.656396	-3.56923	1.52347
NM_019766	Ptges3	172.152	-0.607322	0.149988	-4.04913	5.14088e-05	0.000485164	0.656414	-3.31411	1.52343
NM_175255	Sec24a	117.862	-0.607178	0.179832	-3.37636	0.000734522	0.00479979	0.656479	-2.31878	1.52328
NM_011699	Lin7c	147.934	-0.606978	0.170407	-3.56193	0.000368143	0.00262083	0.656571	-2.58156	1.52307
NM_198017	Fam175b	112.012	-0.605685	0.181157	-3.34342	0.000827529	0.00531204	0.657159	-2.27474	1.5217
NM_010362	Gsto1	127.38	-0.604079	0.169311	-3.56786	0.000359913	0.00256859	0.657891	-2.5903	1.52001
NM_178602	Polr2m	322.902	-0.603648	0.122358	-4.93346	8.07844e-07	1.18899e-05	0.658088	-4.92482	1.51955
NM_019794	Dnaja2	624.576	-0.603505	0.101492	-5.94633	2.74227e-09	6.74784e-08	0.658153	-7.17084	1.5194
NM_194462	Akap9	1105.7	-0.603072	0.104445	-5.77406	7.73842e-09	1.78343e-07	0.658351	-6.74874	1.51895
NM_001081300	Tshz1	224.606	-0.602476	0.1415	-4.2578	2.06453e-05	0.000219188	0.658622	-3.65918	1.51832
NM_030081	Zfyve20	197.541	-0.601868	0.141445	-4.25515	2.08912e-05	0.00022155	0.6589	-3.65453	1.51768
NM_023502	Elf2	139.325	-0.600321	0.181374	-3.30985	0.000933444	0.00586885	0.659607	-2.23145	1.51605
NM_007861	Dld	406.184	-0.597955	0.120622	-4.95725	7.14989e-07	1.06393e-05	0.66069	-4.97309	1.51357
NM_008211	H3f3b	1086.5	-0.597898	0.094373	-6.33547	2.36617e-10	7.12036e-09	0.660716	-8.1475	1.51351
NM_016699	Exosc10	283.493	-0.597472	0.142036	-4.20647	2.5939e-05	0.000270826	0.660911	-3.56731	1.51306
NM_001045529	Morc3	188.313	-0.597182	0.148556	-4.01992	5.8217e-05	0.000537725	0.661044	-3.26944	1.51276
NM_152804	Plk2	167.209	-0.596499	0.157643	-3.78385	0.000154419	0.00125031	0.661357	-2.90298	1.51204
NM_009030	Rbbp4	713.324	-0.595757	0.104593	-5.69594	1.22698e-08	2.70249e-07	0.661697	-6.56824	1.51127
NM_138592	Usp39	143.919	-0.595605	0.163575	-3.64117	0.0002714	0.00201134	0.661767	-2.69651	1.51111
NM_172712	Uba6	115.551	-0.594578	0.18667	-3.18518	0.00144662	0.00853254	0.662238	-2.06892	1.51003
NM_022981	Zfp110	102.935	-0.593497	0.184438	-3.21787	0.00129148	0.00775789	0.662734	-2.11026	1.5089
NM_133916	Eif3b	180.553	-0.592314	0.154588	-3.83158	0.000127325	0.00105827	0.663278	-2.9754	1.50766
NM_028866	Wdr33	230.591	-0.590168	0.141472	-4.17163	3.02434e-05	0.000308607	0.664266	-3.51059	1.50542
NM_009005	Rab7	301.185	-0.588483	0.121952	-4.82552	1.39641e-06	1.96058e-05	0.665042	-4.70762	1.50366
NM_016926	Sart3	266.262	-0.588131	0.129154	-4.55371	5.27084e-06	6.43464e-05	0.665204	-4.19148	1.5033
NM_010435	Hira	240.274	-0.588129	0.140366	-4.18998	2.78984e-05	0.000288415	0.665205	-3.53998	1.5033
NM_026295	Ctdp1	138.174	-0.587809	0.167198	-3.51563	0.000438704	0.0030638	0.665353	-2.51374	1.50296
NM_053075	Rheb	403.972	-0.587304	0.116073	-5.0598	4.1969e-07	6.59841e-06	0.665586	-5.18056	1.50244
NM_010431	Hif1a	517.88	-0.586574	0.109461	-5.35876	8.37932e-08	1.55247e-06	0.665922	-5.80898	1.50168
NM_013933	Vapa	342.33	-0.586494	0.123624	-4.74419	2.09339e-06	2.82175e-05	0.665959	-4.54948	1.50159
NM_017374	Ppp2cb	310.308	-0.585676	0.124058	-4.72097	2.34717e-06	3.11495e-05	0.666337	-4.50655	1.50074
NM_008913	Ppp3ca	1455.29	-0.585194	0.107168	-5.46053	4.74713e-08	9.3165e-07	0.66656	-6.03075	1.50024
NM_025542	2410001C21Rik	214.356	-0.585136	0.143802	-4.06903	4.72094e-05	0.000451957	0.666586	-3.3449	1.50018
NM_031172	Trim17	106.145	-2.59414	0.224923	-11.5334	8.95017e-31	3.02036e-28	0.16561	-27.5199	6.03828
NM_030707	Fcrls	162.157	-2.44371	0.192196	-12.7147	4.90161e-37	3.08769e-34	0.18381	-33.5104	5.4404
NM_178932	Aoc2	77.7318	-2.41233	0.240333	-10.0375	1.04325e-23	1.69959e-21	0.187852	-20.7697	5.32334
NM_010277	Gfap	195.044	-2.05071	0.173768	-11.8014	3.83649e-32	1.39427e-29	0.241365	-28.8557	4.1431
NM_018868	Nop58	127.579	-1.88859	0.194384	-9.71579	2.58245e-22	3.93573e-20	0.270071	-19.405	3.70273
NM_144523	Zfp622	330.11	-1.85385	0.13131	-14.1181	2.93651e-45	3.083e-42	0.276653	-41.511	3.61464
NM_009780	C4b	194.751	-1.84487	0.16305	-11.3147	1.10951e-29	3.38186e-27	0.278381	-26.4708	3.5922
NM_009777	C1qb	107.369	-1.73541	0.199558	-8.69626	3.42999e-18	3.48494e-16	0.300324	-15.4578	3.32974
NM_007771	Cry1	390.024	-1.67395	0.135146	-12.3862	3.10416e-35	1.8332e-32	0.313395	-31.7368	3.19086
NM_007572	C1qa	95.854	-1.65132	0.212925	-7.75542	8.805e-15	5.4025e-13	0.318348	-12.2674	3.14121
NM_010422	Hexb	381.08	-1.60105	0.135529	-11.8134	3.32787e-32	1.2578e-29	0.329636	-28.9004	3.03365
NM_029078	Pcf11	416.345	-1.59756	0.226251	-7.06102	1.65282e-12	7.09888e-11	0.330435	-10.1488	3.02632
NM_029278	Nop14	235.079	-1.57881	0.144441	-10.9305	8.24223e-28	1.99694e-25	0.334758	-24.6996	2.98724
NM_011150	Lgals3bp	79.5693	-1.56755	0.212753	-7.36796	1.73254e-13	8.70783e-12	0.33738	-11.0601	2.96402
NM_001271397	unknown	171.344	-1.5534	0.165538	-9.38397	6.35337e-21	8.22369e-19	0.340705	-18.0849	2.93509
NM_198606	Dcaf13	78.0844	-1.51184	0.21303	-7.09687	1.27616e-12	5.60491e-11	0.350663	-10.2514	2.85174
NM_009983	Ctsd	733.279	-1.47376	0.109881	-13.4123	5.12401e-41	4.03473e-38	0.360043	-37.3942	2.77745
NM_177214	Snrnp200	1063.03	-1.46837	0.0950956	-15.441	8.67833e-54	1.64003e-50	0.361391	-49.7851	2.76709
NM_017373	Nfil3	107.122	-1.45349	0.19638	-7.40141	1.34741e-13	6.80838e-12	0.365138	-11.167	2.73869
NM_007574	C1qc	59.6183	-1.44461	0.240033	-6.01836	1.76195e-09	4.47546e-08	0.367393	-7.34916	2.72188
NM_133859	Olfml3	86.276	-1.38168	0.215509	-6.41125	1.44332e-10	4.51589e-09	0.38377	-8.34526	2.60572
NM_009510	Ezr	144.276	-1.34836	0.193756	-6.95909	3.42466e-12	1.40263e-10	0.392737	-9.85306	2.54623
NM_010686	Laptm5	53.035	-1.28596	0.249802	-5.14792	2.63394e-07	4.37401e-06	0.410098	-5.35912	2.43844
NM_153505	Nckap1l	43.0673	-1.28051	0.258689	-4.94999	7.42191e-07	1.10267e-05	0.411651	-4.95756	2.42924
NM_025289	Tbrg1	192.792	-1.22307	0.154692	-7.90653	2.64652e-15	1.80982e-13	0.428369	-12.7424	2.33444
NM_007913	Egr1	221.794	-1.19879	0.16488	-7.27068	3.57684e-13	1.70695e-11	0.435641	-10.7678	2.29547
NM_028599	Wdr75	145.813	-1.16341	0.167886	-6.92977	4.21519e-12	1.70211e-10	0.446455	-9.76901	2.23987
NM_010481	Hspa9	1091.99	-1.15659	0.0974898	-11.8637	1.82689e-32	7.19262e-30	0.448571	-29.1431	2.2293
NM_010444	Nr4a1	222.731	-1.07747	0.166162	-6.4845	8.90268e-11	2.89077e-09	0.473858	-8.53899	2.11034
NM_010234	Fos	331.33	-1.05474	0.304346	-3.46558	0.000529085	0.00360962	0.481385	-2.44254	2.07734
NM_009744	Bcl6	166.89	-0.963347	0.163307	-5.89898	3.65763e-09	8.83911e-08	0.512866	-7.05359	1.94983
NM_144907	Sesn2	38.4172	-0.908086	0.267085	-3.39999	0.000673893	0.00444666	0.532892	-2.35197	1.87655
NM_001033528	Usp36	283.004	-0.894143	0.133952	-6.67508	2.47105e-11	8.98037e-10	0.538067	-9.04671	1.85851
NM_013657	Sema3c	43.7928	-0.874226	0.255937	-3.41579	0.000635981	0.00421711	0.545546	-2.37498	1.83302
NM_021524	Nampt	155.751	-0.787727	0.161908	-4.86527	1.14301e-06	1.62656e-05	0.579256	-4.78873	1.72635
NM_146200	Eif3c	769.724	-0.786651	0.0973929	-8.07708	6.6334e-16	4.85883e-14	0.579688	-13.3135	1.72506
NM_013614	Odc1	136.749	-0.690581	0.170095	-4.05996	4.90802e-05	0.000465235	0.619604	-3.33233	1.61393
NM_009716	Atf4	727.573	-0.68874	0.0977323	-7.04721	1.82542e-12	7.73471e-11	0.620395	-10.1116	1.61188
NM_013454	Abca1	270.642	-0.685954	0.13235	-5.18286	2.18509e-07	3.68037e-06	0.621595	-5.43411	1.60876
NM_029023	Scpep1	91.6991	-0.653079	0.199885	-3.26728	0.00108586	0.00670605	0.635922	-2.17353	1.57252
NM_013932	Ddx25	80.6272	-0.650894	0.198817	-3.27383	0.00106102	0.00656125	0.636886	-2.18301	1.57014
NM_011671	Ucp2	116.693	-0.628316	0.174568	-3.59927	0.000319118	0.00232128	0.646931	-2.63427	1.54576
NM_026030	Eif2s2	427.373	-0.610534	0.129743	-4.70571	2.52983e-06	3.3245e-05	0.654954	-4.47827	1.52682
NM_001164659	Trank1	886.229	-0.586305	0.094282	-6.21863	5.01506e-10	1.42733e-08	0.666046	-7.84548	1.5014

## Sheet: Triple mut specific down (547)
Figure 3 -Source Data 1. Genes that weredownregulated in the B6J-nmf205-/-;Gcn2-/- cerebellum but not in the B6-nmf205-/- cerebellum.
id	name	baseMean	log2foldChange	lfcSE	stat	pval	padj	lfc	mlog10padj	RFC
NM_138582	D17H6S56E-3	38.7306	2.71775	0.296204	9.17524	4.5059e-20	5.38939e-18	6.57844	-17.2685	0.152012
NM_139305	Car9	51.1469	2.51178	0.268051	9.37055	7.2153e-21	9.21316e-19	5.70324	-18.0356	0.175339
NM_011607	Tnc	108.081	2.25894	0.19657	11.4918	1.45037e-30	4.72569e-28	4.7864	-27.3255	0.208925
NM_007607	Car4	199.093	2.06538	0.157959	13.0754	4.55149e-39	3.30824e-36	4.18544	-35.4804	0.238923
NM_009893	Chrd	145.289	2.03201	0.186337	10.905	1.0907e-27	2.51367e-25	4.08974	-24.5997	0.244514
NM_016782	Cntnap1	554.859	1.95132	0.1128	17.299	4.78928e-67	1.50846e-63	3.86729	-62.8215	0.258579
NM_181045	Caln1	16.3865	1.88457	0.345713	5.45125	5.00165e-08	9.74099e-07	3.69243	-6.0114	0.270825
NM_145934	Stap2	59.0374	1.85655	0.241452	7.6891	1.48177e-14	8.5897e-13	3.6214	-12.066	0.276136
NM_175178	Aifm3	463.676	1.7828	0.128127	13.9143	5.18917e-44	4.45749e-41	3.44093	-40.3509	0.290619
NM_019626	Cbln1	1262.79	1.74259	0.094062	18.526	1.27485e-76	1.20461e-72	3.34635	-71.9192	0.298833
NM_001033342	Cdc42bpg	341.297	1.67379	0.138708	12.0671	1.57649e-33	7.09347e-31	3.19053	-30.1491	0.313428
NM_001005424	Gm996	791.123	1.65782	0.118065	14.0416	8.67284e-45	8.19497e-42	3.15539	-41.0865	0.316918
NM_172619	Adamts10	570.635	1.64858	0.103582	15.9157	4.92819e-57	1.16416e-53	3.13525	-52.934	0.318954
NM_177049	Jph4	350.786	1.63156	0.133799	12.1941	3.34142e-34	1.75406e-31	3.09848	-30.756	0.322739
NM_183311	Tmem145	310.431	1.62726	0.14649	11.1083	1.1429e-28	3.17625e-26	3.08926	-25.4981	0.323703
NM_001199676	Camkk2	79.0298	1.62161	0.215047	7.54072	4.67392e-14	2.47102e-12	3.07718	-11.6071	0.324973
NM_183180	Tspan18	15.9511	1.59677	0.343785	4.64467	3.40622e-06	4.34351e-05	3.02464	-4.36216	0.330617
NM_183152	Plk5	103.515	1.58431	0.191857	8.25775	1.48448e-16	1.17873e-14	2.99864	-13.9286	0.333484
NM_008429	Kcnj9	130.53	1.55036	0.178044	8.70775	3.09973e-18	3.18363e-16	2.92891	-15.4971	0.341424
NM_001161665	Kif26b	211.036	1.54164	0.167072	9.2274	2.77292e-20	3.35914e-18	2.91126	-17.4738	0.343494
NM_001039198	Zfhx2	427.006	1.51903	0.145401	10.4472	1.50952e-25	2.99639e-23	2.86598	-22.5234	0.348921
NM_013509	Eno2	2024.54	1.50968	0.0868695	17.3787	1.19539e-67	5.64762e-64	2.84748	-63.2481	0.351188
NM_146025	Samd14	236.771	1.50356	0.14936	10.0667	7.75706e-24	1.30886e-21	2.83541	-20.8831	0.352683
NM_153081	Slc16a11	196.884	1.48326	0.153194	9.68222	3.58847e-22	5.21653e-20	2.7958	-19.2826	0.35768
NM_175556	Plch2	122.412	1.46613	0.177492	8.26025	1.45373e-16	1.1641e-14	2.7628	-13.934	0.361952
NM_197945	Prosapip1	349.719	1.46302	0.131843	11.0967	1.30187e-28	3.51467e-26	2.75684	-25.4541	0.362734
NM_001033263	Agap2	647.748	1.45732	0.101396	14.3726	7.6918e-47	1.19601e-43	2.74599	-42.9223	0.364168
NM_010601	Kcnh3	34.6667	1.45635	0.280987	5.18298	2.18367e-07	3.68037e-06	2.74413	-5.43411	0.364414
NM_213616	Atp2b4	26.704	1.43461	0.304224	4.71563	2.40964e-06	3.1889e-05	2.70309	-4.49636	0.369948
NM_022814	Svep1	137.836	1.41815	0.170549	8.3152	9.15951e-17	7.46105e-15	2.67243	-14.1272	0.374191
NM_001005477	Barhl2	120.969	1.39775	0.182051	7.67784	1.61796e-14	9.20968e-13	2.63491	-12.0358	0.379519
NM_001085378	Myh7b	68.5649	1.39089	0.235443	5.90753	3.47267e-09	8.43528e-08	2.6224	-7.0739	0.381329
NM_001144855	Ppfia4	1376.36	1.38271	0.107716	12.8366	1.02257e-37	6.90165e-35	2.60757	-34.161	0.383499
NM_013589	Ltbp2	120.513	1.37992	0.181443	7.60522	2.84424e-14	1.59025e-12	2.60253	-11.7985	0.384241
NM_027410	Tecpr1	824.72	1.37283	0.112974	12.1517	5.61568e-34	2.65313e-31	2.58978	-30.5762	0.386134
NM_019581	Gtpbp2	23.4953	1.36806	0.312479	4.37808	1.19729e-05	0.000134681	2.58123	-3.87069	0.387413
NM_175087	Aqp6	21.8933	1.36577	0.319089	4.28023	1.86702e-05	0.0002007	2.57714	-3.69745	0.388027
NM_001113360	Plch2	294.843	1.36305	0.133987	10.173	2.61745e-24	4.66647e-22	2.57228	-21.331	0.38876
NM_033610	Sncb	322.211	1.36195	0.137109	9.93332	2.98168e-23	4.69565e-21	2.57032	-20.3283	0.389056
NM_008979	Ptpn22	104.979	1.35633	0.193707	7.00195	2.52422e-12	1.04611e-10	2.56033	-9.98042	0.390575
NM_008851	Pitpnm1	1424.01	1.35041	0.0940215	14.3628	8.86026e-47	1.19601e-43	2.54985	-42.9223	0.39218
NM_027829	Izumo4	17.1665	1.35019	0.333764	4.04533	5.22487e-05	0.000491242	2.54945	-3.3087	0.392241
NM_027877	Mus81	150.455	1.34854	0.181847	7.41579	1.20898e-13	6.14176e-12	2.54654	-11.2117	0.392689
NM_009800	Car11	137.552	1.34511	0.167132	8.04818	8.40351e-16	6.10806e-14	2.54049	-13.2141	0.393624
NM_011503	Stxbp2	115.827	1.34462	0.180971	7.43005	1.08554e-13	5.57463e-12	2.53964	-11.2538	0.393757
NM_182929	Rims3	284.002	1.33319	0.139839	9.53376	1.51683e-21	2.0475e-19	2.51959	-18.6888	0.39689
NM_146257	Slc29a4	95.1245	1.32743	0.219916	6.03605	1.57928e-09	4.04408e-08	2.50954	-7.39318	0.398479
NM_009946	Cplx2	492.244	1.32317	0.115186	11.4873	1.52796e-30	4.81255e-28	2.50216	-27.3176	0.399655
NM_207202	Ccdc120	94.6476	1.31484	0.212932	6.1749	6.62035e-10	1.81848e-08	2.48774	-7.74029	0.401971
NM_028454	Tm7sf2	76.9546	1.30748	0.207575	6.29882	2.99914e-10	8.88366e-09	2.47509	-8.05141	0.404026
NM_010768	Matk	97.3754	1.29901	0.209705	6.19446	5.84864e-10	1.63988e-08	2.4606	-7.78519	0.406405
NM_178592	Abhd16a	543.068	1.2935	0.107411	12.0425	2.12386e-33	9.122e-31	2.45122	-30.0399	0.407961
NM_001114664	Iqsec2	118.514	1.28316	0.17805	7.20676	5.72981e-13	2.6282e-11	2.43372	-10.5803	0.410894
NM_013871	Mapk12	63.0266	1.28221	0.228446	5.61276	1.99126e-08	4.20926e-07	2.43212	-6.37579	0.411165
NM_001034895	Zfr2	142.275	1.27769	0.166309	7.68264	1.55846e-14	8.92477e-13	2.4245	-12.0494	0.412456
NM_010630	Kifc2	729.529	1.27762	0.107149	11.9238	8.89392e-33	3.65386e-30	2.42439	-29.4372	0.412475
NM_175462	Kcnt1	31.3282	1.27618	0.290249	4.39684	1.09839e-05	0.000124295	2.42197	-3.90555	0.412888
NM_011846	Mmp17	67.5845	1.27241	0.222924	5.70783	1.14429e-08	2.54409e-07	2.41565	-6.59447	0.413967
NM_008083	Gap43	185.807	1.25682	0.153405	8.19283	2.55145e-16	1.97612e-14	2.38969	-13.7042	0.418465
NM_175651	Cnpy1	145.35	1.24961	0.170347	7.33565	2.20656e-13	1.09736e-11	2.37777	-10.9597	0.420563
NM_027865	Tmem25	227.832	1.24933	0.141115	8.85331	8.49634e-19	9.2278e-17	2.37731	-16.0349	0.420643
NM_028417	Ttc9b	195.091	1.24774	0.144619	8.62779	6.25469e-18	6.03067e-16	2.37469	-15.2196	0.421108
NM_025582	2810405K02Rik	175.413	1.24269	0.158987	7.8163	5.44003e-15	3.47317e-13	2.36639	-12.4593	0.422585
NM_001024474	Diras2	382.506	1.24205	0.134051	9.26553	1.94107e-20	2.41332e-18	2.36535	-17.6174	0.422771
NM_008844	Pip5k1c	44.4961	1.23687	0.254138	4.8669	1.1336e-06	1.6156e-05	2.35686	-4.79167	0.424293
NM_021272	Fabp7	88.263	1.23592	0.218928	5.64534	1.64855e-08	3.56456e-07	2.35532	-6.44799	0.424571
NM_001102563	Prrt2	673.388	1.23466	0.111382	11.0849	1.48488e-28	3.8974e-26	2.35326	-25.4092	0.424943
NM_174988	Cdh22	319.292	1.23461	0.130709	9.44548	3.53793e-21	4.70843e-19	2.35317	-18.3271	0.424958
NM_008690	Nfkbie	42.1152	1.23172	0.278973	4.41517	1.0093e-05	0.000115459	2.34846	-3.93757	0.425811
NM_175486	6430571L13Rik	68.6666	1.22583	0.216976	5.64961	1.60817e-08	3.48522e-07	2.3389	-6.45777	0.427551
NM_016974	Dbp	131.737	1.22502	0.174022	7.03947	1.92974e-12	8.14021e-11	2.33759	-10.0894	0.42779
NM_001081332	Slc9a5	147.15	1.21295	0.167929	7.22299	5.08578e-13	2.36727e-11	2.31812	-10.6258	0.431385
NM_019392	Tyro3	392.811	1.20806	0.113327	10.6599	1.56746e-26	3.36612e-24	2.31026	-23.4729	0.432851
NM_001024560	Snx32	160.616	1.20596	0.159872	7.5433	4.58218e-14	2.44616e-12	2.30691	-11.6115	0.433479
NM_025685	Col27a1	63.5845	1.2042	0.230883	5.21562	1.83201e-07	3.1474e-06	2.30409	-5.50205	0.43401
NM_001080925	Rapgefl1	126.596	1.19953	0.173596	6.9099	4.84994e-12	1.91745e-10	2.29665	-9.71728	0.435418
NM_030890	Prrt1	265.909	1.19016	0.141287	8.42371	3.64762e-17	3.07735e-15	2.28178	-14.5118	0.438254
NM_139302	Sh3glb2	544.845	1.18753	0.105409	11.266	1.93254e-29	5.70644e-27	2.27762	-26.2436	0.439055
NM_019820	Cbln3	619.507	1.18007	0.108143	10.9121	1.00864e-27	2.38266e-25	2.26589	-24.6229	0.441329
NM_153557	BC029214	174.242	1.17691	0.155069	7.58957	3.20976e-14	1.75312e-12	2.26092	-11.7562	0.442299
NM_021344	Tesc	122.006	1.17522	0.177766	6.61104	3.81629e-11	1.35057e-09	2.25827	-8.86948	0.442817
NM_001193305	Mical2	69.4445	1.17355	0.21444	5.47263	4.43393e-08	8.76491e-07	2.25567	-6.05725	0.443328
NM_177204	Fam40b	40.2676	1.17243	0.274089	4.27754	1.88967e-05	0.000202903	2.2539	-3.69271	0.443675
NM_025980	Nrarp	14.91	1.17213	0.352079	3.32917	0.000871065	0.00556103	2.25344	-2.25484	0.443766
NM_138313	Bmf	22.2635	1.17092	0.316526	3.69928	0.00021621	0.00165691	2.25155	-2.7807	0.444139
NM_001195075	Klhl3	67.6273	1.16994	0.232366	5.03491	4.78069e-07	7.40953e-06	2.25003	-5.13021	0.444439
NM_010599	Kcnab3	40.405	1.16925	0.276518	4.22849	2.35266e-05	0.000246903	2.24895	-3.60747	0.444652
NM_030240	2900092E17Rik	387.054	1.16664	0.138785	8.40612	4.23812e-17	3.54389e-15	2.24489	-14.4505	0.445457
NM_021546	Necab3	174.935	1.16623	0.16046	7.26807	3.64654e-13	1.73147e-11	2.24425	-10.7616	0.445583
NM_009179	St3gal2	106.747	1.1633	0.182435	6.37651	1.81168e-10	5.5943e-09	2.23969	-8.25225	0.446491
NM_010119	Ehd1	113.071	1.15925	0.179683	6.45166	1.10632e-10	3.55565e-09	2.23342	-8.44908	0.447744
NM_030166	Galntl2	116.199	1.14995	0.179586	6.40335	1.52001e-10	4.74013e-09	2.21907	-8.32421	0.45064
NM_022980	Rcan3	73.0967	1.1453	0.230208	4.97507	6.52238e-07	9.84504e-06	2.21192	-5.00678	0.452096
NM_007762	Crhr1	117.698	1.14185	0.192089	5.94441	2.77453e-09	6.80949e-08	2.20664	-7.16689	0.453177
NM_025850	Fank1	23.5104	1.13968	0.309767	3.67915	0.000234013	0.00177037	2.20332	-2.75194	0.453861
NM_001007220	Adam22	24.0857	1.13846	0.316694	3.59485	0.000324583	0.00234838	2.20147	-2.62923	0.454243
NM_001114096	Smarcc2	68.7304	1.13596	0.21806	5.20936	1.89489e-07	3.24362e-06	2.19764	-5.48897	0.455033
NM_001013385	Grm4	1425.17	1.1287	0.105786	10.6696	1.41181e-26	3.10238e-24	2.18661	-23.5083	0.457328
NM_207203	BC068157	102.516	1.12267	0.184863	6.07297	1.25564e-09	3.31411e-08	2.1775	-7.47963	0.459243
NM_001024645	Lrrc16b	282.807	1.1196	0.132161	8.47155	2.42143e-17	2.11852e-15	2.17287	-14.674	0.46022
NM_172875	Adc	50.4268	1.11924	0.239498	4.67328	2.96423e-06	3.82115e-05	2.17233	-4.41781	0.460336
NM_144852	Slc7a4	92.3967	1.11696	0.206779	5.40171	6.60079e-08	1.25476e-06	2.1689	-5.90144	0.461064
NM_001025577	Maf	48.7133	1.11236	0.242967	4.57825	4.68874e-06	5.79136e-05	2.162	-4.23722	0.462535
NM_028627	Psd	643.52	1.1071	0.109074	10.15	3.31406e-24	5.69355e-22	2.15413	-21.2446	0.464225
NM_001199242	Kcnip4	17.7212	1.10664	0.332883	3.32441	0.000886053	0.00562497	2.15344	-2.24988	0.464374
NM_146241	Trhde	95.2731	1.10341	0.199565	5.5291	3.21884e-08	6.52678e-07	2.14862	-6.1853	0.465414
NM_177370	Rhbdd3	33.909	1.0995	0.276046	3.98304	6.804e-05	0.000612295	2.14281	-3.21304	0.466678
NM_001162489	Heatr7a	16.1239	1.09912	0.339936	3.2333	0.0012237	0.0074263	2.14223	-2.12923	0.466803
NM_007740	Col9a1	25.0247	1.09896	0.308541	3.56179	0.000368341	0.00262083	2.142	-2.58156	0.466854
NM_026161	C1qtnf4	273.92	1.09594	0.134534	8.1462	3.75535e-16	2.83874e-14	2.13752	-13.5469	0.467832
NM_019798	Pde4a	14.6746	1.09437	0.34213	3.19869	0.00138052	0.00820929	2.1352	-2.08569	0.468341
NM_001039645	Asphd1	41.1575	1.09411	0.261738	4.18019	2.91269e-05	0.000299554	2.13482	-3.52352	0.468424
NM_011993	Dpysl4	511.309	1.09295	0.126963	8.60837	7.41037e-18	6.97333e-16	2.13309	-15.1566	0.468803
NM_001101506	Gm5151	67.5292	1.0883	0.22306	4.87897	1.06643e-06	1.52909e-05	2.12624	-4.81557	0.470314
NM_153169	Pnma3	46.068	1.08675	0.252759	4.29955	1.71147e-05	0.000186465	2.12395	-3.7294	0.47082
NM_023179	Atp6v1g2	311.066	1.08548	0.125556	8.6454	5.36189e-18	5.27755e-16	2.12208	-15.2776	0.471236
NM_001033458	Gm1673	40.9814	1.08198	0.271434	3.98615	6.71532e-05	0.000606625	2.11694	-3.21708	0.47238
NM_172439	Inpp5j	365.49	1.07894	0.125986	8.56404	1.08981e-17	9.90155e-16	2.11249	-15.0043	0.473375
NM_011350	Sema4f	30.4493	1.07864	0.29426	3.66561	0.000246746	0.00185334	2.11205	-2.73204	0.473474
NM_172923	AI118078	239.299	1.07848	0.13708	7.86748	3.61859e-15	2.37445e-13	2.1118	-12.6244	0.473529
NM_175432	Tmem132c	64.9936	1.07694	0.231881	4.64438	3.41106e-06	4.34382e-05	2.10956	-4.36213	0.474033
NM_001042407	Pex10	37.0846	1.07458	0.266076	4.03863	5.37638e-05	0.000502984	2.10611	-3.29845	0.474808
NM_011838	Lynx1	147.653	1.07452	0.164283	6.54067	6.12447e-11	2.05943e-09	2.10602	-8.68625	0.474828
NM_145220	Appl2	761.558	1.07414	0.1155	9.29988	1.40601e-20	1.77138e-18	2.10546	-17.7517	0.474956
NM_178699	B930041F14Rik	98.3798	1.07213	0.187862	5.70702	1.14973e-08	2.54421e-07	2.10254	-6.59445	0.475616
NM_198034	Sidt1	69.0663	1.07024	0.221453	4.83281	1.34621e-06	1.89856e-05	2.09979	-4.72158	0.476239
NM_001242940	E130003G02Rik	60.2185	1.06561	0.229677	4.63961	3.49067e-06	4.43921e-05	2.09305	-4.35269	0.477771
NM_001033379	Dcp1b	37.7411	1.06115	0.266405	3.98323	6.79843e-05	0.000612295	2.0866	-3.21304	0.479249
NM_001001160	Fbxo41	212.958	1.06094	0.145809	7.27623	3.4328e-13	1.65492e-11	2.08629	-10.7812	0.479319
NM_019754	Tagln3	779.097	1.06038	0.0953657	11.1191	1.01335e-28	2.90156e-26	2.08548	-25.5374	0.479507
NM_028841	Tspan17	76.8588	1.0594	0.207153	5.11407	3.15289e-07	5.11006e-06	2.08406	-5.29157	0.479833
NM_030251	Abtb1	192.934	1.05901	0.162487	6.51747	7.15033e-11	2.3802e-09	2.0835	-8.62339	0.479962
NM_026720	Ankrd13d	183.441	1.0575	0.147615	7.16392	7.84038e-13	3.49452e-11	2.08133	-10.4566	0.480463
NM_178702	Radil	84.4442	1.05571	0.206416	5.1145	3.14577e-07	5.10729e-06	2.07874	-5.29181	0.48106
NM_013534	Leprel2	82.0963	1.05315	0.205565	5.12319	3.00416e-07	4.93675e-06	2.07505	-5.30656	0.481916
NM_144816	Rhbdl1	161.183	1.0518	0.159605	6.59001	4.39804e-11	1.53915e-09	2.07311	-8.81272	0.482366
NM_148946	Slc8a2	646.495	1.05081	0.111462	9.42753	4.19873e-21	5.51025e-19	2.07169	-18.2588	0.482697
NM_010564	Inha	26.4338	1.04502	0.29969	3.487	0.000488477	0.00337646	2.06339	-2.47154	0.484639
NM_146206	Tpcn2	32.2731	1.03994	0.285415	3.64359	0.000268864	0.00199668	2.05614	-2.69969	0.486349
NM_007732	Col17a1	26.6894	1.03565	0.298237	3.47256	0.000515521	0.00352727	2.05003	-2.45256	0.487797
NM_009208	Slc4a3	406.06	1.03197	0.11261	9.1641	4.99624e-20	5.90119e-18	2.04481	-17.2291	0.489042
NM_053199	Cadm3	1192.19	1.02876	0.112291	9.16154	5.11639e-20	5.96849e-18	2.04027	-17.2241	0.490132
NM_177672	Tmem201	173.262	1.02868	0.156709	6.56426	5.2291e-11	1.79021e-09	2.04015	-8.7471	0.490159
NM_029798	Flywch2	22.4677	1.02757	0.309016	3.32529	0.000883273	0.00562023	2.03858	-2.25025	0.490537
NM_001002927	Penk	227.616	1.02274	0.149353	6.84781	7.49905e-12	2.89219e-10	2.03177	-9.53877	0.492181
NM_011866	Pde10a	114.265	1.02182	0.191452	5.33721	9.43858e-08	1.71181e-06	2.03048	-5.76655	0.492495
NM_175692	Snhg11	269.656	1.01352	0.144299	7.02377	2.15954e-12	9.0691e-11	2.01883	-10.0424	0.495335
NM_178389	Gale	23.1604	1.01263	0.313231	3.23285	0.00122562	0.00743318	2.01758	-2.12883	0.495642
NM_001024139	Adamts15	49.7474	1.01237	0.242474	4.17518	2.97751e-05	0.000305146	2.01722	-3.51549	0.495731
NM_008916	Inpp5k	123.433	1.01105	0.172773	5.8519	4.85997e-09	1.15382e-07	2.01538	-6.93786	0.496185
NM_172748	Fbxl19	97.5766	1.00861	0.196628	5.12955	2.90433e-07	4.78936e-06	2.01198	-5.31972	0.497023
NM_009734	Azi1	171.809	1.00294	0.157311	6.37555	1.82313e-10	5.61132e-09	2.00408	-8.25093	0.498981
NM_001013749	Tmem151b	274.334	0.993711	0.131519	7.55565	4.16775e-14	2.23756e-12	1.9913	-11.6502	0.502184
NM_144941	Mtap7d1	94.1254	0.992592	0.191332	5.1878	2.12792e-07	3.59691e-06	1.98976	-5.44407	0.502574
NM_025933	Higd2a	80.828	0.991026	0.205254	4.8283	1.37704e-06	1.93914e-05	1.9876	-4.71239	0.50312
NM_172449	Bzrap1	992.957	0.990981	0.0950628	10.4245	1.91676e-25	3.69621e-23	1.98754	-22.4322	0.503135
NM_176834	Rnf208	265.088	0.990615	0.130465	7.59295	3.12703e-14	1.72791e-12	1.98703	-11.7625	0.503263
NM_020002	Rec8	111.597	0.987754	0.18988	5.202	1.97153e-07	3.36263e-06	1.9831	-5.47332	0.504262
NM_001014995	Fam189b	94.3485	0.987253	0.199679	4.94419	7.64627e-07	1.13422e-05	1.98241	-4.9453	0.504438
NM_023622	Rgl3	112.562	0.98692	0.181054	5.45097	5.00956e-08	9.74099e-07	1.98195	-6.0114	0.504554
NM_001081081	Gls	101.628	0.98549	0.18954	5.19939	1.99948e-07	3.40417e-06	1.97999	-5.46799	0.505054
NM_008815	Etv4	54.1242	0.984897	0.246354	3.9979	6.39068e-05	0.000580073	1.97917	-3.23652	0.505262
NM_153545	Lrrc45	193.748	0.981828	0.150956	6.50405	7.81835e-11	2.57406e-09	1.97497	-8.58938	0.506338
NM_011789	Apc2	752.654	0.97959	0.0984152	9.95365	2.43099e-23	3.89329e-21	1.97191	-20.4097	0.507124
NM_026616	Rnaseh2c	54.5696	0.978393	0.238653	4.09964	4.1379e-05	0.000401016	1.97027	-3.39684	0.507545
NM_027984	Epn3	56.7552	0.977503	0.23358	4.18487	2.85332e-05	0.000294334	1.96905	-3.53116	0.507858
NM_177708	Rtn4rl1	126.141	0.976633	0.184156	5.30329	1.13731e-07	2.03917e-06	1.96787	-5.69055	0.508164
NM_001002895	AI413582	36.5441	0.976208	0.274732	3.55331	0.000380416	0.00269053	1.96729	-2.57016	0.508314
NM_011777	Zyx	285.781	0.970711	0.128733	7.54052	4.68105e-14	2.47102e-12	1.95981	-11.6071	0.510255
NM_001114333	Grm1	22.338	0.969523	0.309186	3.13573	0.00171428	0.0098353	1.95819	-2.00721	0.510675
NM_173068	Syt7	84.7004	0.969307	0.211001	4.59384	4.35157e-06	5.4317e-05	1.9579	-4.26506	0.510752
NM_026137	Wdr13	283.021	0.968453	0.124012	7.80932	5.74982e-15	3.622e-13	1.95674	-12.4411	0.511054
NM_008759	Sebox	27.5549	0.965129	0.302913	3.18616	0.00144173	0.00850898	1.95224	-2.07012	0.512233
NM_172779	Ddx26b	198.807	0.964604	0.155905	6.18711	6.12757e-10	1.69793e-08	1.95153	-7.77008	0.512419
NM_018775	Tbc1d8	184.255	0.964171	0.15451	6.2402	4.37003e-10	1.27054e-08	1.95094	-7.89601	0.512573
NM_021793	Tmem8	68.6189	0.963645	0.216686	4.44719	8.70023e-06	0.000101117	1.95023	-3.99517	0.51276
NM_026125	Fam132a	45.2306	0.961639	0.253857	3.78812	0.000151791	0.00123219	1.94752	-2.90932	0.513473
NM_134050	Rab15	106.786	0.961496	0.180568	5.32483	1.01049e-07	1.81869e-06	1.94733	-5.74024	0.513524
NM_133185	Rogdi	151.752	0.956952	0.1721	5.56045	2.69083e-08	5.51532e-07	1.9412	-6.25843	0.515144
NM_028994	Pck2	131.29	0.955378	0.170137	5.61534	1.96175e-08	4.15618e-07	1.93909	-6.38131	0.515706
NM_009599	Ache	248.855	0.952833	0.138051	6.90204	5.12597e-12	2.01814e-10	1.93567	-9.69505	0.516617
NM_175137	Vars2	83.7333	0.95205	0.20417	4.66302	3.116e-06	3.99499e-05	1.93462	-4.39848	0.516898
NM_021551	Slc22a17	1124.81	0.947736	0.0978488	9.68572	3.46771e-22	5.20101e-20	1.92884	-19.2839	0.518445
NM_013566	Itgb7	31.5096	0.947445	0.28134	3.36762	0.0007582	0.00492387	1.92845	-2.30769	0.51855
NM_015807	Nt5c	136.294	0.945294	0.16971	5.57005	2.54662e-08	5.25393e-07	1.92558	-6.27952	0.519324
NM_133922	Krba1	288.809	0.943174	0.124272	7.58962	3.20856e-14	1.75312e-12	1.92275	-11.7562	0.520088
NM_028211	2210016L21Rik	281.351	0.939653	0.130189	7.21761	5.29109e-13	2.43881e-11	1.91807	-10.6128	0.521358
NM_024229	Pcyt2	321.23	0.939128	0.135117	6.95046	3.64108e-12	1.48295e-10	1.91737	-9.82887	0.521548
NM_026530	Mpnd	288.305	0.937979	0.125662	7.4643	8.37467e-14	4.34788e-12	1.91584	-11.3617	0.521963
NM_018883	Camkk1	97.1378	0.937959	0.19526	4.80364	1.55808e-06	2.14719e-05	1.91582	-4.66813	0.521971
NM_011510	Abcc8	255.011	0.936943	0.143087	6.54808	5.82819e-11	1.98096e-09	1.91447	-8.70312	0.522338
NM_013866	Zfp385a	346.268	0.935036	0.119808	7.80446	5.9756e-15	3.72312e-13	1.91194	-12.4291	0.523029
NM_198113	Ssh3	169.524	0.93424	0.163153	5.72616	1.02731e-08	2.3112e-07	1.91088	-6.63616	0.523318
NM_001163154	Etv1	29.4379	0.933228	0.290764	3.20957	0.00132932	0.00794482	1.90954	-2.09992	0.523685
NM_001166164	Ccdc74a	107.809	0.932556	0.193281	4.82488	1.4009e-06	1.96105e-05	1.90865	-4.70751	0.523929
NM_053267	Selm	343.516	0.930216	0.124634	7.46357	8.4206e-14	4.34788e-12	1.90556	-11.3617	0.52478
NM_009897	Ckmt1	470.255	0.930171	0.114184	8.14627	3.75321e-16	2.83874e-14	1.9055	-13.5469	0.524796
NM_020605	Jph3	557.89	0.928575	0.11647	7.97265	1.55311e-15	1.09517e-13	1.90339	-12.9605	0.525377
NM_013533	Gpr162	554.422	0.9275	0.117319	7.90579	2.66235e-15	1.80982e-13	1.90198	-12.7424	0.525769
NM_199011	Dgkq	223.23	0.926165	0.149185	6.20816	5.36076e-10	1.51205e-08	1.90022	-7.82043	0.526255
NM_017383	Cntn6	211.146	0.92589	0.159544	5.80336	6.4998e-09	1.51272e-07	1.89986	-6.82024	0.526356
NM_008422	Kcnc3	1295.82	0.919964	0.117296	7.84312	4.39475e-15	2.84425e-13	1.89207	-12.546	0.528522
NM_183307	Ccdc63	65.4816	0.919425	0.217444	4.22833	2.35432e-05	0.000246903	1.89136	-3.60747	0.52872
NM_010611	Kcnq2	95.4284	0.919078	0.195404	4.70348	2.55763e-06	3.35187e-05	1.89091	-4.47471	0.528847
NM_008027	Flot1	260.058	0.917109	0.132919	6.89977	5.20872e-12	2.04221e-10	1.88833	-9.6899	0.529569
NM_001099636	Pnmal2	449.167	0.915325	0.11552	7.92352	2.30874e-15	1.59236e-13	1.88599	-12.798	0.530224
NM_028055	Btbd17	140.526	0.908682	0.162675	5.58587	2.32532e-08	4.80786e-07	1.87733	-6.31805	0.532672
NM_010173	Faah	126.665	0.908029	0.168111	5.40138	6.61306e-08	1.25476e-06	1.87648	-5.90144	0.532913
NM_024211	Slc25a11	178.413	0.907554	0.161807	5.60887	2.03646e-08	4.29521e-07	1.87586	-6.36702	0.533088
NM_010047	Dgcr6	156.136	0.907095	0.156721	5.78796	7.12474e-09	1.65409e-07	1.87527	-6.78144	0.533258
NM_029007	Fam84a	59.6209	0.906932	0.225912	4.01454	5.95607e-05	0.000547993	1.87505	-3.26122	0.533318
NM_198168	Ppp2r5b	191.807	0.906393	0.145374	6.23489	4.52092e-10	1.30637e-08	1.87435	-7.88393	0.533517
NM_030205	Coro7	229.519	0.906048	0.140639	6.44238	1.17613e-10	3.74185e-09	1.87391	-8.42691	0.533645
NM_001013829	Shf	543.813	0.90337	0.101977	8.85858	8.10416e-19	8.90421e-17	1.87043	-16.0504	0.534637
NM_001009573	Unc13d	31.7246	0.901593	0.278117	3.24178	0.00118786	0.00723847	1.86813	-2.14035	0.535295
NM_025960	Trappc6a	32.5799	0.901487	0.286253	3.14927	0.0016368	0.00946518	1.86799	-2.02387	0.535335
NM_030074	Zfp687	339.198	0.901206	0.117844	7.64746	2.04987e-14	1.15983e-12	1.86763	-11.9356	0.535439
NM_001040106	Aak1	45.2833	0.900965	0.250542	3.59606	0.00032307	0.0023416	1.86732	-2.63049	0.535528
NM_033444	Clic1	98.3876	0.900138	0.189664	4.74596	2.07523e-06	2.80127e-05	1.86624	-4.55265	0.535836
NM_177235	Bend6	119.71	0.899751	0.194103	4.63543	3.56192e-06	4.51766e-05	1.86574	-4.34509	0.535979
NM_001037878	Tcf25	50.0237	0.89898	0.242448	3.70793	0.000208963	0.00161447	1.86475	-2.79197	0.536266
NM_001029868	Pdzd4	256.284	0.893586	0.135569	6.59139	4.35742e-11	1.5306e-09	1.85779	-8.81514	0.538274
NM_009548	Rnf112	929.394	0.892511	0.109114	8.17966	2.84651e-16	2.18672e-14	1.8564	-13.6602	0.538676
NM_019914	Mllt11	88.3864	0.892157	0.196825	4.53274	5.82242e-06	7.0624e-05	1.85595	-4.15105	0.538808
NM_182840	Emilin3	44.9082	0.889823	0.254087	3.50205	0.000461701	0.00321016	1.85295	-2.49347	0.53968
NM_130457	Cntnap4	179.916	0.889327	0.16649	5.34162	9.21173e-08	1.6771e-06	1.85231	-5.77544	0.539866
NM_001033409	Lgr6	44.0911	0.889154	0.253748	3.50408	0.000458182	0.00318804	1.85209	-2.49648	0.539931
NM_011049	Cdk16	1087.55	0.88861	0.0857187	10.3666	3.51879e-25	6.64982e-23	1.85139	-22.1772	0.540134
NM_182991	Tmem59l	1528.8	0.888342	0.0843991	10.5255	6.5917e-26	1.35402e-23	1.85105	-22.8684	0.540235
NM_172434	Celf3	68.3468	0.886424	0.213139	4.1589	3.19781e-05	0.000322133	1.84859	-3.49196	0.540953
NM_007708	Cit	294.504	0.883596	0.144433	6.11767	9.49526e-10	2.54166e-08	1.84497	-7.59488	0.542015
NM_001007570	Slc25a42	38.5164	0.881858	0.266436	3.30983	0.000933526	0.00586885	1.84275	-2.23145	0.542668
NM_011322	Scn1b	1544.72	0.881418	0.0893515	9.86462	5.92583e-23	9.1792e-21	1.84219	-20.0372	0.542833
NM_172911	D8Ertd82e	244.303	0.880807	0.152831	5.76325	8.25073e-09	1.89226e-07	1.8414	-6.72302	0.543064
NM_133733	9030425E11Rik	78.6801	0.880329	0.207322	4.2462	2.17429e-05	0.000230065	1.84079	-3.63815	0.543244
NM_008478	L1cam	409.894	0.879762	0.112545	7.81696	5.41152e-15	3.47317e-13	1.84007	-12.4593	0.543457
NM_011906	Tpra1	110.816	0.877747	0.183681	4.77866	1.7647e-06	2.42012e-05	1.8375	-4.61616	0.544216
NM_009326	Tcea2	72.4209	0.872985	0.216286	4.03625	5.43116e-05	0.000507105	1.83145	-3.2949	0.546016
NM_001160353	Grm2	58.1569	0.870997	0.234363	3.71644	0.000202046	0.00156486	1.82893	-2.80552	0.546769
NM_010350	Grin2c	1382.81	0.870769	0.104798	8.30904	9.64806e-17	7.79184e-15	1.82864	-14.1084	0.546855
NM_145579	Mypop	54.3244	0.869892	0.230251	3.77802	0.000158082	0.00127559	1.82753	-2.89429	0.547188
NM_145217	Diras1	41.2513	0.868135	0.273416	3.17514	0.00149764	0.00877321	1.8253	-2.05684	0.547855
NM_026708	Tlcd1	63.435	0.867455	0.223473	3.88171	0.000103726	0.000892629	1.82444	-3.04933	0.548113
NM_001081051	D130043K22Rik	42.1221	0.866805	0.269637	3.21472	0.00130574	0.00782365	1.82362	-2.10659	0.54836
NM_001110783	Ank1	92.3448	0.86553	0.199117	4.34684	1.3811e-05	0.000153396	1.82201	-3.81419	0.548845
NM_183019	Arhgef4	133.746	0.864754	0.179824	4.8089	1.5176e-06	2.11301e-05	1.82103	-4.6751	0.54914
NM_182993	Slc17a7	1698.79	0.862273	0.0931164	9.26016	2.04121e-20	2.50486e-18	1.8179	-17.6012	0.550085
NM_177139	Lypd6	42.6024	0.861758	0.260799	3.3043	0.000952141	0.00596208	1.81725	-2.2246	0.550281
NM_146178	Ccdc106	46.5506	0.861533	0.246524	3.49473	0.00047455	0.00328982	1.81697	-2.48283	0.550368
NM_001081040	Coq10a	38.8889	0.861435	0.269831	3.1925	0.00141047	0.00835059	1.81684	-2.07828	0.550405
NM_021485	Rps6kb2	90.0732	0.861024	0.197612	4.35714	1.31772e-05	0.000147177	1.81633	-3.83216	0.550561
NM_177994	C030046I01Rik	178.874	0.860736	0.157906	5.45095	5.01018e-08	9.74099e-07	1.81596	-6.0114	0.550672
NM_030729	Nckipsd	133.735	0.860122	0.166641	5.16153	2.44935e-07	4.08904e-06	1.81519	-5.38838	0.550906
NM_019479	Hes6	39.5766	0.858856	0.259609	3.30826	0.000938774	0.00589792	1.8136	-2.2293	0.55139
NM_001081333	Plekhg4	39.6312	0.858634	0.27366	3.13759	0.00170341	0.0097929	1.81332	-2.00909	0.551474
NM_028009	Rpusd1	88.1938	0.858597	0.198462	4.32626	1.51663e-05	0.000166636	1.81327	-3.77823	0.551489
NM_028375	Cxx1c	138.075	0.856968	0.209005	4.10022	4.12757e-05	0.000400425	1.81123	-3.39748	0.552112
NM_007756	Cplx1	911.481	0.856161	0.0886152	9.66156	4.39141e-22	6.28704e-20	1.81021	-19.2016	0.552421
NM_008451	Klc2	832.741	0.854724	0.0993608	8.60222	7.81856e-18	7.2429e-16	1.80841	-15.1401	0.552971
NM_013675	Spnb1	1556.2	0.854356	0.10191	8.38344	5.14039e-17	4.22361e-15	1.80795	-14.3743	0.553112
NM_025898	Napa	671.302	0.849735	0.0979561	8.67465	4.14835e-18	4.12608e-16	1.80217	-15.3845	0.554887
NM_053272	Dhcr24	203.239	0.849487	0.149439	5.68453	1.31176e-08	2.86918e-07	1.80186	-6.54224	0.554982
NM_177788	Exoc3l	61.6888	0.848022	0.246025	3.44689	0.000567084	0.00383563	1.80003	-2.41616	0.555546
NM_176973	Podxl2	705.094	0.845837	0.10932	7.73729	1.01558e-14	6.15142e-13	1.79731	-12.211	0.556388
NM_001033128	Bbs1	57.7695	0.845693	0.230444	3.66985	0.000242695	0.00182582	1.79713	-2.73854	0.556444
NM_032543	Rnf123	592.709	0.84289	0.119389	7.06002	1.66475e-12	7.11775e-11	1.79364	-10.1477	0.557526
NM_029884	Hgsnat	125.961	0.8426	0.1725	4.88464	1.03617e-06	1.48811e-05	1.79328	-4.82737	0.557638
NM_172283	Fuk	144.552	0.842554	0.168063	5.01332	5.34996e-07	8.20645e-06	1.79322	-5.08584	0.557655
NM_054040	Tulp4	75.0183	0.840789	0.209148	4.02006	5.81822e-05	0.000537725	1.79103	-3.26944	0.558338
NM_175528	E330009J07Rik	219.814	0.839608	0.162663	5.16163	2.44807e-07	4.08904e-06	1.78956	-5.38838	0.558796
NM_023229	Fastk	184.027	0.83862	0.151114	5.5496	2.86328e-08	5.81831e-07	1.78834	-6.2352	0.559178
NM_009451	Tubb4a	1170.74	0.838155	0.0989278	8.47239	2.40409e-17	2.11852e-15	1.78776	-14.674	0.559359
NM_198305	Klhl17	233.252	0.835806	0.140224	5.9605	2.51475e-09	6.23671e-08	1.78485	-7.20504	0.56027
NM_178774	Prr18	86.9858	0.834359	0.203105	4.10802	3.99068e-05	0.000388341	1.78306	-3.41079	0.560832
NM_177261	Kndc1	1626.46	0.834214	0.105686	7.89334	2.94193e-15	1.97856e-13	1.78289	-12.7037	0.560889
NM_146094	Fads1	255.624	0.832777	0.15004	5.55038	2.85049e-08	5.8048e-07	1.78111	-6.23621	0.561447
NM_001033320	Rltpr	267.022	0.831835	0.129441	6.42639	1.30669e-10	4.11565e-09	1.77995	-8.38556	0.561814
NM_016703	Preb	197.973	0.831441	0.142665	5.82792	5.61239e-09	1.32579e-07	1.77946	-6.87753	0.561968
NM_138682	Lrrc4	169.787	0.830268	0.163093	5.09076	3.56628e-07	5.72118e-06	1.77802	-5.24251	0.562425
NM_001099631	Sh2d5	69.954	0.830218	0.224405	3.69964	0.000215904	0.00165591	1.77795	-2.78096	0.562444
NM_080793	Setd7	176.285	0.824842	0.15203	5.42551	5.7789e-08	1.10536e-06	1.77134	-5.9565	0.564544
NM_009782	Cacna1e	695.632	0.822066	0.20508	4.00851	6.11034e-05	0.000559463	1.76794	-3.25223	0.565631
NM_177354	Vash1	139.843	0.819884	0.161367	5.08086	3.75721e-07	5.97674e-06	1.76526	-5.22354	0.566488
NM_145520	Trub2	57.7582	0.819875	0.237021	3.45909	0.000542013	0.00368452	1.76525	-2.43362	0.566491
NM_007863	Mpp3	542.65	0.818397	0.129273	6.33079	2.43916e-10	7.3167e-09	1.76345	-8.13568	0.567072
NM_144786	Ggt7	373.981	0.815164	0.128971	6.32051	2.60701e-10	7.77085e-09	1.7595	-8.10953	0.568344
NM_021567	Pcbp4	331.17	0.813989	0.117722	6.91452	4.69454e-12	1.87167e-10	1.75807	-9.72777	0.568807
NM_018747	Akap7	60.0563	0.813156	0.226378	3.59203	0.000328118	0.00236851	1.75705	-2.62552	0.569136
NM_172546	Cnksr3	187.398	0.811476	0.150548	5.39015	7.03996e-08	1.31985e-06	1.75501	-5.87947	0.569799
NM_173751	Ilvbl	130.533	0.811341	0.166812	4.86379	1.15159e-06	1.6363e-05	1.75484	-4.78614	0.569852
NM_153791	Flywch1	938.46	0.806617	0.104433	7.72375	1.12953e-14	6.71254e-13	1.74911	-12.1731	0.571721
NM_001113181	Gria4	388.259	0.804715	0.116197	6.92544	4.34627e-12	1.74757e-10	1.7468	-9.75757	0.572475
NM_028651	Tmtc4	136.435	0.804357	0.169848	4.73574	2.18257e-06	2.92111e-05	1.74637	-4.53445	0.572617
NM_009872	Cdk5r2	103.953	0.801533	0.181769	4.40961	1.03556e-05	0.000118033	1.74295	-3.92799	0.573739
NM_134438	Gpr37l1	1336.91	0.80082	0.0927881	8.63063	6.10146e-18	5.94358e-16	1.74209	-15.226	0.574023
NM_008855	Prkcb	476.108	0.79938	0.111558	7.16558	7.74574e-13	3.4687e-11	1.74035	-10.4598	0.574596
NM_027875	Syde1	52.4838	0.799118	0.236846	3.374	0.00074085	0.00483112	1.74004	-2.31595	0.5747
NM_175274	Ttyh3	452.902	0.798786	0.125714	6.35401	2.0977e-10	6.37338e-09	1.73964	-8.19563	0.574833
NM_197943	Sgsm2	88.1488	0.797005	0.193606	4.11664	3.84432e-05	0.000376815	1.73749	-3.42387	0.575543
NM_133708	Gmppa	173.793	0.794273	0.151434	5.245	1.5628e-07	2.73968e-06	1.7342	-5.5623	0.576633
NM_145410	Fam173a	233.631	0.793593	0.139421	5.69205	1.25526e-08	2.75195e-07	1.73339	-6.56036	0.576906
NM_021286	Sez6	373.404	0.793418	0.119558	6.63629	3.21687e-11	1.14703e-09	1.73318	-8.94043	0.576976
NM_008170	Grin2a	98.011	0.790751	0.189808	4.16605	3.09922e-05	0.000313778	1.72998	-3.50338	0.578043
NM_019427	Epb4.1l4b	66.4106	0.790543	0.221006	3.57703	0.000347524	0.0024877	1.72973	-2.6042	0.578126
NM_001029877	Nova2	55.9689	0.790023	0.230348	3.42969	0.000604272	0.00404005	1.7291	-2.39361	0.578335
NM_031404	Actl6b	145.574	0.789965	0.158819	4.974	6.55839e-07	9.88361e-06	1.72903	-5.00508	0.578358
NM_001126047	Sema4c	128.57	0.789191	0.185077	4.26412	2.00693e-05	0.000214035	1.72811	-3.66951	0.578668
NM_023556	Mvk	82.7832	0.789054	0.199738	3.95045	7.80036e-05	0.000688194	1.72794	-3.16229	0.578723
NM_008258	Hn1	47.8601	0.788344	0.248253	3.17556	0.00149546	0.00876587	1.72709	-2.05721	0.579008
NM_025877	Slc25a23	490.697	0.787755	0.106969	7.36433	1.78037e-13	8.9009e-12	1.72639	-11.0506	0.579245
NM_145219	Lgi3	238.154	0.787421	0.137538	5.72511	1.03369e-08	2.32002e-07	1.72599	-6.63451	0.579379
NM_001014761	Scn2b	271.231	0.787036	0.131896	5.96711	2.41486e-09	6.00475e-08	1.72553	-7.2215	0.579534
NM_008520	Ltbp3	271.047	0.786616	0.131436	5.9848	2.16661e-09	5.41594e-08	1.72502	-7.26633	0.579702
NM_009415	Tpi1	1367.59	0.785669	0.095328	8.24174	1.69718e-16	1.32534e-14	1.72389	-13.8777	0.580083
NM_027081	Fam116b	219.007	0.784076	0.146427	5.35473	8.56857e-08	1.58119e-06	1.72199	-5.80101	0.580724
NM_146030	Plekhh3	234.915	0.783589	0.150934	5.1916	2.08498e-07	3.53064e-06	1.72141	-5.45215	0.58092
NM_033072	Mbd6	168.835	0.781811	0.164198	4.76139	1.92265e-06	2.61022e-05	1.71929	-4.58332	0.581636
NM_197991	2310044H10Rik	270.844	0.781541	0.136154	5.74013	9.46024e-09	2.14719e-07	1.71897	-6.66813	0.581745
NM_001195006	Ndrg4	279.146	0.780033	0.138462	5.63357	1.76518e-08	3.78213e-07	1.71717	-6.42226	0.582354
NM_030725	Syt13	230.471	0.779141	0.143407	5.43307	5.53921e-08	1.06816e-06	1.71611	-5.97136	0.582714
NM_010065	Dnm1	3536.53	0.777639	0.0808918	9.61332	7.02456e-22	9.90672e-20	1.71432	-19.0041	0.583321
NM_145633	Ankrd27	53.9035	0.775954	0.236186	3.28535	0.00101855	0.0063276	1.71232	-2.19876	0.584002
NM_008323	Idh3g	508.146	0.775489	0.113268	6.84651	7.56731e-12	2.90665e-10	1.71177	-9.53661	0.584191
NM_007705	Cirbp	182.732	0.774898	0.164885	4.69964	2.60623e-06	3.40215e-05	1.71107	-4.46825	0.58443
NM_172466	Adamts18	152.277	0.774369	0.192288	4.02713	5.6461e-05	0.000525098	1.71044	-3.27976	0.584644
NM_175414	Tspan9	427.091	0.773971	0.113756	6.80378	1.01909e-11	3.88282e-10	1.70997	-9.41085	0.584805
NM_023061	Mcam	130.13	0.773281	0.174004	4.44405	8.82819e-06	0.000102479	1.70915	-3.98937	0.585085
NM_028715	Fcho1	127.866	0.772078	0.182091	4.24007	2.23445e-05	0.000235378	1.70773	-3.62824	0.585574
NM_012038	Vsnl1	456.419	0.770861	0.109891	7.0148	2.30283e-12	9.58566e-11	1.70629	-10.0184	0.586067
NM_175195	3110056O03Rik	213.744	0.76927	0.142	5.41741	6.0469e-08	1.15429e-06	1.70441	-5.93769	0.586714
NM_028420	Camk2n2	136.458	0.766673	0.166627	4.60114	4.20178e-06	5.26559e-05	1.70134	-4.27855	0.587771
NM_133667	Pdk2	149.752	0.766174	0.162272	4.72154	2.34062e-06	3.11062e-05	1.70075	-4.50715	0.587975
NM_009000	Rab24	122.571	0.76591	0.184627	4.14843	3.34763e-05	0.000335437	1.70044	-3.47439	0.588082
NM_021457	Fzd1	108.152	0.765811	0.184317	4.15485	3.25503e-05	0.000327548	1.70033	-3.48472	0.588123
NM_020035	Pigo	149.335	0.765432	0.160533	4.76808	1.85988e-06	2.5396e-05	1.69988	-4.59523	0.588277
NM_177129	Cntn2	915.028	0.765274	0.114545	6.68098	2.37357e-11	8.65941e-10	1.69969	-9.06251	0.588342
NM_001164679	Ano8	310.955	0.764677	0.121039	6.31763	2.65603e-10	7.89209e-09	1.69899	-8.10281	0.588585
NM_001163319	Tubgcp6	348.124	0.764326	0.118893	6.4287	1.28703e-10	4.06726e-09	1.69858	-8.3907	0.588728
NM_013851	Abca8b	119.75	0.763457	0.182074	4.19312	2.75146e-05	0.00028476	1.69755	-3.54552	0.589083
NM_173347	Prune	143.959	0.762333	0.162468	4.6922	2.70285e-06	3.5178e-05	1.69623	-4.45373	0.589542
NM_017395	Rfx5	88.4672	0.761234	0.196379	3.87636	0.000106032	0.000907513	1.69494	-3.04215	0.589991
NM_019963	Stat2	320.45	0.759627	0.132413	5.73679	9.64898e-09	2.17597e-07	1.69305	-6.66235	0.590649
NM_138602	Praf2	83.3969	0.758971	0.196164	3.86906	0.000109254	0.000930874	1.69228	-3.03111	0.590918
NM_029348	Zbtb4	344.032	0.755908	0.118815	6.36204	1.99097e-10	6.108e-09	1.68869	-8.2141	0.592173
NM_021452	Kcnmb4	93.8853	0.75513	0.189122	3.99282	6.52931e-05	0.000592087	1.68778	-3.22761	0.592493
NM_173426	Fam110b	84.962	0.755118	0.200248	3.77092	0.000162646	0.00130795	1.68777	-2.88341	0.592498
NM_199302	Lrsam1	131.828	0.754803	0.170977	4.41464	1.01176e-05	0.0001156	1.6874	-3.93704	0.592627
NM_013908	Fbxw5	258.707	0.753852	0.13097	5.75592	8.61731e-09	1.96679e-07	1.68629	-6.70624	0.593018
NM_177318	Zfp653	128.206	0.753513	0.173426	4.34486	1.39367e-05	0.000154201	1.68589	-3.81191	0.593157
NM_001081373	Cep164	129.345	0.752128	0.180344	4.17051	3.03913e-05	0.000309782	1.68428	-3.50894	0.593727
NM_019697	Kcnd2	211.14	0.75133	0.146884	5.11512	3.13539e-07	5.10729e-06	1.68334	-5.29181	0.594056
NM_018873	Srcin1	1451.89	0.7495	0.0968282	7.74051	9.90152e-15	6.03609e-13	1.68121	-12.2192	0.59481
NM_007668	Cdk5	125.03	0.749112	0.169582	4.41741	9.98901e-06	0.000114546	1.68076	-3.94102	0.59497
NM_009059	Rgl2	178.989	0.749111	0.153912	4.86714	1.13225e-06	1.6156e-05	1.68076	-4.79167	0.59497
NM_028636	Man2c1	203.831	0.748841	0.148489	5.04306	4.58143e-07	7.12005e-06	1.68044	-5.14752	0.595082
NM_001001985	Nat8l	328.662	0.747929	0.140241	5.33318	9.65054e-08	1.74356e-06	1.67938	-5.75856	0.595458
NM_019861	Ctsf	270.506	0.746674	0.133246	5.60371	2.09807e-08	4.39572e-07	1.67792	-6.35697	0.595976
NM_153577	AI428936	53.587	0.746521	0.232978	3.20425	0.00135413	0.00807265	1.67774	-2.09298	0.596039
NM_133772	Ssbp4	99.0866	0.746237	0.187447	3.98105	6.86111e-05	0.000616847	1.67741	-3.20982	0.596156
NM_146226	Apeh	147.348	0.74621	0.158469	4.70888	2.49084e-06	3.28715e-05	1.67738	-4.48318	0.596168
NM_001207021	AI848285	204.533	0.744247	0.150751	4.93693	7.93627e-07	1.17172e-05	1.6751	-4.93118	0.596979
NM_019488	Slc2a8	66.4679	0.744026	0.22328	3.33226	0.000861446	0.00551104	1.67484	-2.25877	0.597071
NM_144801	Tmem143	53.7436	0.743156	0.235854	3.15091	0.00162763	0.00943528	1.67383	-2.02525	0.597431
NM_011670	Uchl1	462.66	0.741908	0.106402	6.9727	3.10915e-12	1.2829e-10	1.67239	-9.89181	0.597948
NM_153793	Rell2	377.889	0.7393	0.133919	5.52051	3.38013e-08	6.80999e-07	1.66937	-6.16685	0.59903
NM_023824	Paqr4	149.535	0.738853	0.172144	4.29206	1.77027e-05	0.000191607	1.66885	-3.71759	0.599216
NM_198250	Lrrc4b	531.701	0.736953	0.114306	6.44717	1.13957e-10	3.63778e-09	1.66665	-8.43916	0.600005
NM_008721	Npdc1	472.394	0.736504	0.113395	6.49503	8.30176e-11	2.7143e-09	1.66613	-8.56634	0.600192
NM_026813	Ppp6r2	477.137	0.736347	0.108655	6.77694	1.22745e-11	4.63927e-10	1.66595	-9.33355	0.600257
NM_175103	Bola2	56.2051	0.736119	0.232008	3.17282	0.00150967	0.00883824	1.66569	-2.05363	0.600352
NM_009053	Rfng	128.619	0.73398	0.173973	4.21894	2.45455e-05	0.000257054	1.66322	-3.58997	0.601243
NM_010415	Hbegf	70.5105	0.733824	0.21183	3.46422	0.00053178	0.00362539	1.66304	-2.44065	0.601308
NM_009127	Scd1	117.402	0.732033	0.185543	3.94536	7.96818e-05	0.000701037	1.66098	-3.15426	0.602055
NM_201407	Dennd4b	270.315	0.731058	0.136513	5.35524	8.54446e-08	1.57997e-06	1.65986	-5.80135	0.602462
NM_009447	Tuba4a	498.752	0.730344	0.107493	6.79437	1.0879e-11	4.12833e-10	1.65903	-9.38423	0.60276
NM_144810	Klhdc8a	93.4449	0.729628	0.203785	3.58038	0.000343101	0.00245789	1.65821	-2.60944	0.603059
NM_178060	Thra	1112.04	0.728313	0.0861784	8.45123	2.88262e-17	2.45472e-15	1.6567	-14.61	0.603609
NM_023279	Tubb3	388.972	0.727959	0.137297	5.30208	1.14493e-07	2.04896e-06	1.65629	-5.68847	0.603757
NM_001113569	Stxbp1	157.119	0.725972	0.153056	4.74318	2.10394e-06	2.83192e-05	1.65401	-4.54792	0.604589
NM_026988	Ptms	495.261	0.725375	0.117028	6.19828	5.7082e-10	1.60526e-08	1.65333	-7.79445	0.60484
NM_025285	Stmn2	1369.49	0.724628	0.0939841	7.71011	1.25714e-14	7.42419e-13	1.65247	-12.1294	0.605153
NM_172924	C230081A13Rik	152.196	0.724548	0.161234	4.49375	6.99795e-06	8.3595e-05	1.65238	-4.07782	0.605187
NM_007694	Chgb	1968.57	0.723683	0.098784	7.32592	2.37268e-13	1.17379e-11	1.65139	-10.9304	0.605549
NM_008911	Ppox	79.1242	0.723559	0.20518	3.52645	0.000421168	0.00295882	1.65125	-2.52888	0.605602
NM_207237	Man1c1	156.194	0.723554	0.158115	4.57611	4.73699e-06	5.8357e-05	1.65124	-4.23391	0.605604
NM_175160	Zdhhc1	98.6512	0.72306	0.188216	3.84165	0.000122212	0.00102283	1.65068	-2.99019	0.605811
NM_173788	Npr2	137.197	0.722048	0.175317	4.11853	3.81289e-05	0.000374571	1.64952	-3.42647	0.606236
NM_011778	Coro1b	268.001	0.721712	0.140896	5.12231	3.01813e-07	4.94251e-06	1.64914	-5.30605	0.606378
NM_013892	Pcsk1n	510.116	0.720404	0.128217	5.61864	1.92466e-08	4.09597e-07	1.64764	-6.38764	0.606928
NM_008057	Fzd7	70.2609	0.71945	0.210836	3.41237	0.000644004	0.00426496	1.64655	-2.37008	0.607329
NM_029391	Rab4b	115.846	0.71765	0.183074	3.92	8.85494e-05	0.000772872	1.6445	-3.11189	0.608087
NM_177298	Pisd	179.945	0.716947	0.184533	3.8852	0.000102246	0.000880692	1.6437	-3.05518	0.608383
NM_007750	Cox8a	768.461	0.715714	0.0988952	7.23709	4.58409e-13	2.15498e-11	1.6423	-10.6666	0.608904
NM_146002	Rhbdd2	101.749	0.715432	0.193005	3.7068	0.000209897	0.00161904	1.64197	-2.79074	0.609023
NM_008403	Itgb1bp1	68.0397	0.715418	0.213913	3.34444	0.000824487	0.00529611	1.64196	-2.27604	0.609029
NM_007379	Abca2	1825.94	0.714683	0.0895649	7.9795	1.46924e-15	1.05606e-13	1.64112	-12.9763	0.609339
NM_001102455	Aplp2	60.9894	0.714082	0.227445	3.13958	0.00169191	0.00974214	1.64044	-2.01135	0.609593
NM_010045	Darc	181.893	0.712006	0.157103	4.53208	5.84046e-06	7.0752e-05	1.63808	-4.15026	0.610471
NM_145587	Sbk1	799.497	0.710922	0.0977213	7.275	3.46419e-13	1.66158e-11	1.63685	-10.7795	0.61093
NM_134164	Syt12	286.209	0.70924	0.136099	5.21119	1.8763e-07	3.21763e-06	1.63494	-5.49246	0.611642
NM_133804	Tmem132a	1988.03	0.708389	0.0902951	7.84526	4.32055e-15	2.81551e-13	1.63398	-12.5504	0.612003
NM_001002005	Panx2	143.033	0.707386	0.161192	4.38848	1.14148e-05	0.000128863	1.63284	-3.88987	0.612429
NM_153129	Pacs1	170.302	0.706596	0.152335	4.63843	3.51058e-06	4.45854e-05	1.63195	-4.35081	0.612764
NM_026599	Cgnl1	166.142	0.704888	0.150189	4.69335	2.68768e-06	3.50288e-05	1.63002	-4.45557	0.61349
NM_080553	Itpr3	90.3544	0.703227	0.191458	3.673	0.000239719	0.0018063	1.62814	-2.74321	0.614197
NM_021316	Cend1	224.654	0.702999	0.139878	5.0258	5.01325e-07	7.74023e-06	1.62788	-5.11125	0.614294
NM_144518	2900011O08Rik	152.768	0.702361	0.178478	3.93528	8.31003e-05	0.000727724	1.62717	-3.13803	0.614566
NM_019465	Crtam	80.447	0.701029	0.204465	3.42861	0.000606684	0.00404841	1.62566	-2.39272	0.615133
NM_153161	BC037034	106.024	0.699409	0.186774	3.74468	0.00018062	0.00142699	1.62384	-2.84558	0.615824
NM_177652	Ryr3	116.852	0.698227	0.174552	4.00011	6.33123e-05	0.000576337	1.62251	-3.23932	0.616329
NM_001024717	Gal3st3	94.7355	0.697092	0.201309	3.4628	0.000534586	0.00363927	1.62123	-2.43899	0.616814
NM_001033347	D430041D05Rik	501.147	0.696152	0.130015	5.35439	8.58453e-08	1.58119e-06	1.62018	-5.80101	0.617216
NM_053177	Mcoln1	175.062	0.696025	0.148836	4.67645	2.91882e-06	3.76775e-05	1.62004	-4.42392	0.61727
NM_175381	2700081O15Rik	63.8581	0.694213	0.216864	3.20115	0.00136879	0.00814464	1.618	-2.08913	0.618046
NM_153514	Rhobtb2	151.098	0.693603	0.164921	4.20566	2.60321e-05	0.000271199	1.61732	-3.56671	0.618308
NM_025650	Uqcr11	287.752	0.690218	0.131738	5.23933	1.61165e-07	2.81487e-06	1.61353	-5.55054	0.61976
NM_029741	Ppfia3	618.478	0.689232	0.102136	6.74816	1.49733e-11	5.57019e-10	1.61243	-9.25413	0.620184
NM_008846	Pip5k1b	140.33	0.688976	0.166663	4.13395	3.56575e-05	0.000353174	1.61214	-3.45201	0.620294
NM_007906	Eef1a2	2637.15	0.688853	0.0764847	9.00641	2.12902e-19	2.45331e-17	1.612	-16.6102	0.620347
NM_027905	1300018J18Rik	204.998	0.688812	0.139784	4.9277	8.32023e-07	1.22267e-05	1.61196	-4.91269	0.620365
NM_010010	Cyp46a1	212.575	0.687689	0.156701	4.38854	1.14115e-05	0.000128863	1.6107	-3.88987	0.620847
NM_029933	Bcl9	189.001	0.687569	0.150596	4.56564	4.97968e-06	6.09495e-05	1.61057	-4.21503	0.620899
NM_001081652	Nacad	229.996	0.686782	0.137547	4.99306	5.94295e-07	9.04267e-06	1.60969	-5.0437	0.621238
NM_175521	6430598A04Rik	171.867	0.686758	0.160219	4.28638	1.81611e-05	0.00019612	1.60966	-3.70748	0.621248
NM_027402	Fndc5	220.374	0.684483	0.136158	5.0271	4.9794e-07	7.70055e-06	1.60713	-5.11348	0.622229
NM_026142	3632451O06Rik	268.23	0.684374	0.144697	4.72969	2.24858e-06	2.99673e-05	1.607	-4.52335	0.622276
NM_009010	Rad23a	139.603	0.684131	0.163682	4.17963	2.91981e-05	0.000299681	1.60673	-3.52334	0.622381
NM_009573	Zic1	817.152	0.683611	0.10983	6.22424	4.83898e-10	1.38137e-08	1.60615	-7.85969	0.622605
NM_010787	Mea1	86.4178	0.683442	0.210388	3.24848	0.00116021	0.00708653	1.60597	-2.14957	0.622678
NM_153319	Amot	81.5201	0.680293	0.202585	3.35806	0.000784925	0.00507591	1.60247	-2.29449	0.624038
NM_153152	2410015M20Rik	127.54	0.679373	0.179922	3.77594	0.000159406	0.00128518	1.60144	-2.89104	0.624436
NM_178874	Tmcc2	451.464	0.6792	0.112463	6.03932	1.54769e-09	3.98477e-08	1.60125	-7.3996	0.624511
NM_177387	Ust	121.572	0.678935	0.174447	3.89192	9.94534e-05	0.000861353	1.60096	-3.06482	0.624626
NM_001024707	Lrp3	347.22	0.677167	0.118647	5.70742	1.14701e-08	2.54415e-07	1.599	-6.59446	0.625392
NM_145382	Fam193b	177.535	0.67652	0.155691	4.34528	1.39101e-05	0.000154087	1.59828	-3.81223	0.625673
NM_001080929	Cdr2l	240.774	0.676021	0.143833	4.70004	2.60108e-06	3.40215e-05	1.59773	-4.46825	0.625889
NM_153420	Acpl2	93.9759	0.675577	0.199122	3.39278	0.000691864	0.00454619	1.59724	-2.34235	0.626082
NM_198862	Nlgn2	670.644	0.674126	0.10167	6.63051	3.34523e-11	1.18831e-09	1.59563	-8.92507	0.626712
NM_001081567	Mapk10	75.4641	0.671331	0.21315	3.14957	0.00163509	0.00946518	1.59254	-2.02387	0.627927
NM_026636	5430437P03Rik	183.15	0.670923	0.162905	4.1185	3.8135e-05	0.000374571	1.59209	-3.42647	0.628105
NM_009597	Accn2	138.801	0.66814	0.166966	4.00166	6.28995e-05	0.000573684	1.58902	-3.24133	0.629318
NM_178884	Obsl1	105.5	0.666984	0.187704	3.55338	0.000380315	0.00269053	1.58775	-2.57016	0.629822
NM_172506	Boc	261.498	0.664938	0.138376	4.8053	1.54517e-06	2.13455e-05	1.5855	-4.67069	0.630716
NM_011976	Sema4g	314.214	0.664661	0.132013	5.0348	4.78338e-07	7.40953e-06	1.5852	-5.13021	0.630837
NM_178740	Slitrk4	84.8176	0.664364	0.200681	3.31054	0.000931148	0.0058617	1.58487	-2.23198	0.630967
NM_007480	Arf5	142.606	0.663122	0.159114	4.16759	3.07833e-05	0.000312094	1.58351	-3.50571	0.63151
NM_053194	Ric8	133.723	0.66255	0.165446	4.00464	6.21117e-05	0.000568145	1.58288	-3.24554	0.631761
NM_008817	Peg3	980.851	0.660347	0.0917339	7.19851	6.0874e-13	2.76538e-11	1.58046	-10.5582	0.632726
NM_080555	Ppap2b	176.474	0.659733	0.158069	4.17371	2.9968e-05	0.00030679	1.57979	-3.51316	0.632995
NM_001024142	Fbxo10	104.619	0.657314	0.18073	3.63699	0.00027584	0.00204104	1.57714	-2.69015	0.634058
NM_175457	Heatr7a	120.449	0.65718	0.177522	3.70197	0.000213935	0.00164214	1.577	-2.78459	0.634116
NM_032610	Spnb4	289.881	0.65609	0.136838	4.79465	1.62957e-06	2.24132e-05	1.57581	-4.6495	0.634596
NM_001160400	Megf8	525.882	0.655888	0.110064	5.95916	2.5354e-09	6.27148e-08	1.57559	-7.20263	0.634685
NM_025791	Tmem223	91.3095	0.654874	0.194065	3.37451	0.000739485	0.00482555	1.57448	-2.31645	0.635131
NM_172257	Sidt2	183.405	0.654849	0.15016	4.361	1.29472e-05	0.000144951	1.57445	-3.83878	0.635142
NM_145922	Kcnc4	186.207	0.654673	0.148696	4.40278	1.06874e-05	0.000121231	1.57426	-3.91639	0.635219
NM_053201	Magee1	627.606	0.653725	0.103059	6.34324	2.24979e-10	6.81354e-09	1.57323	-8.16663	0.635637
NM_177078	Adrbk2	254.032	0.652932	0.137035	4.76471	1.89123e-06	2.57125e-05	1.57236	-4.58986	0.635986
NM_138601	D10Jhu81e	221.906	0.652673	0.143064	4.56209	5.06467e-06	6.19095e-05	1.57208	-4.20824	0.636101
NM_001081079	Ogfrl1	164.227	0.651867	0.157847	4.12973	3.63185e-05	0.000358593	1.5712	-3.4454	0.636456
NM_133719	Metrn	803.625	0.651785	0.0986042	6.61011	3.84025e-11	1.35398e-09	1.57111	-8.86839	0.636492
NM_145999	Rhot2	181.387	0.651754	0.150602	4.32765	1.50708e-05	0.000165778	1.57108	-3.78047	0.636506
NM_026805	Svop	197.016	0.651294	0.149369	4.36029	1.2989e-05	0.000145247	1.57058	-3.83789	0.636709
NM_198100	Tbkbp1	303.278	0.650984	0.128445	5.0682	4.01602e-07	6.35635e-06	1.57024	-5.19679	0.636846
NM_026192	Calcoco1	322.498	0.650243	0.126012	5.16019	2.46705e-07	4.11132e-06	1.56943	-5.38602	0.637173
NM_178632	Ints7	145.775	0.648762	0.166708	3.89161	9.9582e-05	0.000861676	1.56782	-3.06466	0.637827
NM_001142965	6430704M03Rik	216.566	0.648655	0.151389	4.2847	1.82989e-05	0.000197381	1.56771	-3.70469	0.637875
NM_133764	Atp6v0e2	135.844	0.647544	0.173759	3.72668	0.000194015	0.00151133	1.5665	-2.82064	0.638366
NM_175244	Hectd3	134.017	0.645193	0.169881	3.79791	0.000145922	0.00119069	1.56395	-2.9242	0.639407
NM_008070	Gabrb2	270.538	0.645179	0.127837	5.04688	4.49075e-07	7.02534e-06	1.56393	-5.15333	0.639414
NM_008712	Nos1	448.527	0.642671	0.136561	4.7061	2.52495e-06	3.32287e-05	1.56122	-4.47849	0.640526
NM_011428	Snap25	3235.4	0.642517	0.0764812	8.40098	4.42786e-17	3.67007e-15	1.56105	-14.4353	0.640595
NM_001024851	Ankrd34a	204.297	0.642504	0.160514	4.0028	6.25962e-05	0.00057182	1.56104	-3.24274	0.6406
NM_153112	Cadm4	793.639	0.642261	0.104231	6.16191	7.18732e-10	1.95292e-08	1.56077	-7.70932	0.640708
NM_011889	42250	731.863	0.642113	0.121447	5.28717	1.24224e-07	2.20223e-06	1.56061	-5.65714	0.640774
NM_013648	Rtn2	97.8493	0.640661	0.189434	3.38198	0.000719661	0.00471246	1.55904	-2.32675	0.641419
NM_001081270	Dscaml1	173.927	0.639638	0.147152	4.34678	1.38152e-05	0.000153396	1.55794	-3.81419	0.641874
NM_001164518	Iglon5	141.312	0.639483	0.168	3.80644	0.000140983	0.00115538	1.55777	-2.93728	0.641943
NM_028805	Katnb1	122.507	0.638726	0.170491	3.74638	0.000179402	0.00141974	1.55695	-2.84779	0.64228
NM_029745	Tbc1d9b	729.141	0.638018	0.096915	6.58328	4.60187e-11	1.60454e-09	1.55619	-8.79465	0.642595
NM_138748	Ppp2r4	389.578	0.637245	0.113838	5.59784	2.17038e-08	4.52713e-07	1.55536	-6.34418	0.642939
NM_033218	Srebf2	603.611	0.636589	0.105455	6.03661	1.57389e-09	4.04122e-08	1.55465	-7.39349	0.643232
NM_007760	Crat	124.393	0.636506	0.172796	3.68357	0.000229987	0.00175113	1.55456	-2.75668	0.643269
NM_029293	Phpt1	96.6568	0.636262	0.185188	3.43576	0.000590897	0.00396829	1.5543	-2.4014	0.643378
NM_178694	Zer1	463.506	0.636024	0.124196	5.12115	3.03677e-07	4.95586e-06	1.55404	-5.30488	0.643484
NM_139311	Mllt6	430.674	0.635866	0.115015	5.52853	3.22931e-08	6.534e-07	1.55387	-6.18482	0.643554
NM_198167	Tmem63b	379.24	0.63553	0.124868	5.08963	3.58761e-07	5.73593e-06	1.55351	-5.2414	0.643704
NM_183178	Fsd1	150.519	0.632929	0.165162	3.83218	0.000127014	0.00105827	1.55071	-2.9754	0.644866
NM_198027	Alkbh6	82.3239	0.632772	0.196232	3.22461	0.00126145	0.00761625	1.55054	-2.11826	0.644936
NM_022653	Thop1	133.812	0.632067	0.169645	3.72583	0.000194674	0.00151522	1.54978	-2.81953	0.645251
NM_177034	Apba1	261.088	0.631584	0.130084	4.85519	1.20271e-06	1.70637e-05	1.54926	-4.76793	0.645467
NM_010271	Gpd1	377.929	0.631507	0.120516	5.24003	1.60552e-07	2.80937e-06	1.54918	-5.55139	0.645502
NM_019811	Acss2	264.267	0.630989	0.129371	4.87736	1.07517e-06	1.53929e-05	1.54863	-4.81268	0.645734
NM_009478	Urod	140.287	0.630138	0.181182	3.47793	0.000505297	0.00346988	1.54771	-2.45969	0.646115
NM_017394	Slc7a10	120.202	0.627135	0.170682	3.67429	0.000238515	0.0018001	1.5445	-2.7447	0.647461
NM_010091	Dvl1	303.87	0.62546	0.123579	5.0612	4.16635e-07	6.57226e-06	1.5427	-5.18229	0.648213
NM_153583	Atg4d	176.624	0.625339	0.146051	4.28166	1.85506e-05	0.00019964	1.54257	-3.69975	0.648267
NM_018781	Egr3	87.3069	0.624343	0.198527	3.14488	0.00166154	0.00959652	1.54151	-2.01789	0.648715
NM_178705	Luzp2	313.248	0.623944	0.125832	4.95854	7.10238e-07	1.05852e-05	1.54108	-4.9753	0.648895
NM_148938	Slc1a3	3224.86	0.623298	0.0791539	7.87451	3.42078e-15	2.26035e-13	1.54039	-12.6458	0.649185
NM_134126	Ift140	100.646	0.623079	0.189922	3.28071	0.00103545	0.00641992	1.54016	-2.19247	0.649284
NM_170760	U2af1l4	154.803	0.621473	0.165605	3.75274	0.000174913	0.0013877	1.53844	-2.8577	0.650007
NM_134091	Sgsm3	112.882	0.621469	0.176423	3.52261	0.000427313	0.00299309	1.53844	-2.52388	0.650009
NM_019945	Mast1	545.345	0.6205	0.111407	5.56966	2.55242e-08	5.25443e-07	1.53741	-6.27947	0.650446
NM_032393	Mtap1a	212.845	0.619885	0.152195	4.07297	4.64175e-05	0.000445278	1.53675	-3.35137	0.650723
NM_001159724	Pvrl2	124.627	0.619758	0.177217	3.49716	0.000470238	0.00326232	1.53662	-2.48647	0.65078
NM_177782	Prex1	801.243	0.619406	0.0943271	6.56657	5.14868e-11	1.77554e-09	1.53624	-8.75067	0.650939
NM_138301	Trpm2	120.033	0.618811	0.172523	3.58684	0.000334709	0.00240507	1.53561	-2.61887	0.651207
NM_007693	Chga	305.086	0.618627	0.123795	4.99717	5.81786e-07	8.87247e-06	1.53541	-5.05196	0.651291
NM_029770	Unc5b	472.102	0.61653	0.125753	4.90269	9.45323e-07	1.37275e-05	1.53318	-4.86241	0.652238
NM_011215	Ptprn2	639.631	0.616364	0.115352	5.34333	9.12549e-08	1.66783e-06	1.53301	-5.77785	0.652313
NM_012030	Slc9a3r1	88.3396	0.616101	0.193896	3.17748	0.00148561	0.00872437	1.53273	-2.05927	0.652432
NM_144942	Csad	114.688	0.615639	0.185475	3.31926	0.000902555	0.00571598	1.53224	-2.24291	0.652641
NM_177900	Hapln4	201.332	0.614718	0.163643	3.75646	0.000172336	0.00137233	1.53126	-2.86254	0.653057
NM_011067	Per3	147.256	0.613735	0.163385	3.75637	0.000172394	0.00137233	1.53022	-2.86254	0.653502
NM_016976	Grm1	184.294	0.613719	0.16758	3.66224	0.000250018	0.00187493	1.5302	-2.72701	0.65351
NM_011989	Slc27a4	264.218	0.61354	0.130828	4.68967	2.7365e-06	3.55181e-05	1.53001	-4.44955	0.653591
NM_023328	Agtpbp1	257.52	0.613271	0.127567	4.80746	1.52863e-06	2.11789e-05	1.52972	-4.6741	0.653713
NM_009469	Ulk1	387.946	0.613027	0.119092	5.14751	2.63969e-07	4.37587e-06	1.52946	-5.35894	0.653824
NM_023684	Lime1	136.841	0.611979	0.171452	3.56939	0.000357815	0.00255555	1.52835	-2.59252	0.654299
NM_009006	Map4k2	355.335	0.611802	0.122433	4.99704	5.8217e-07	8.87247e-06	1.52817	-5.05196	0.654379
NM_007590	Calm3	1000.99	0.611477	0.101345	6.03364	1.60306e-09	4.09386e-08	1.52782	-7.38787	0.654526
NM_021921	Mapk8ip2	614.795	0.610896	0.0991728	6.15991	7.27846e-10	1.97061e-08	1.52721	-7.7054	0.65479
NM_133237	Apcdd1	97.8806	0.608047	0.188562	3.22466	0.00126123	0.00761625	1.52419	-2.11826	0.656084
NM_178256	Reps2	179.214	0.607932	0.155507	3.90936	9.25428e-05	0.000805933	1.52407	-3.0937	0.656136
NM_015731	Atp9a	1276.34	0.607652	0.0876015	6.93654	4.01816e-12	1.62951e-10	1.52378	-9.78794	0.656264
NM_194345	Fam160b2	107.52	0.607113	0.182617	3.32451	0.000885728	0.00562497	1.52321	-2.24988	0.656509
NM_009162	Scg5	281.472	0.606686	0.141262	4.29475	1.74892e-05	0.00018973	1.52276	-3.72186	0.656703
NM_008874	Plcb3	300.997	0.606338	0.1363	4.44854	8.64572e-06	0.000100608	1.52239	-3.99737	0.656862
NM_198625	Mtss1l	725.683	0.605179	0.0997498	6.06697	1.30343e-09	3.41166e-08	1.52117	-7.46703	0.65739
NM_001005511	Lmtk3	346.121	0.60277	0.125408	4.80646	1.53628e-06	2.12537e-05	1.51863	-4.67257	0.658489
NM_145970	Cc2d1a	205.207	0.601665	0.148815	4.04305	5.27614e-05	0.000495569	1.51747	-3.3049	0.658993
NM_008072	Gabrd	437.981	0.601432	0.116949	5.14267	2.70862e-07	4.48226e-06	1.51722	-5.3485	0.6591
NM_009025	Rasa3	383.085	0.598576	0.114593	5.2235	1.75569e-07	3.02728e-06	1.51422	-5.51895	0.660405
NM_133350	Mapre3	343.047	0.597839	0.116978	5.11068	3.20993e-07	5.18472e-06	1.51345	-5.28527	0.660743
NM_026203	Ahi1	201.012	0.596002	0.163838	3.63775	0.000275035	0.00203668	1.51152	-2.69108	0.661585
NM_028707	Psd2	667.279	0.595946	0.111619	5.33911	9.34018e-08	1.69722e-06	1.51146	-5.77026	0.66161
NM_013535	Grcc10	178.695	0.593781	0.159689	3.71835	0.000200526	0.00155564	1.5092	-2.80809	0.662604
NM_011211	Ptprd	652.721	0.592831	0.0988856	5.99512	2.03334e-09	5.09629e-08	1.5082	-7.29275	0.663041
NM_198616	Ccdc85b	253.126	0.592403	0.132616	4.46704	7.93089e-06	9.35568e-05	1.50776	-4.02892	0.663237
NM_019439	Gabbr1	2529.04	0.591913	0.0774628	7.64125	2.15116e-14	1.2099e-12	1.50724	-11.9173	0.663463
NM_033134	Inpp5e	149.504	0.590473	0.158727	3.72006	0.000199176	0.00154758	1.50574	-2.81035	0.664125
NM_010917	Nid1	221.865	0.588573	0.142262	4.13726	3.51475e-05	0.000349399	1.50376	-3.45668	0.665
NM_153508	Clstn3	1409.9	0.587161	0.089435	6.56523	5.19531e-11	1.78511e-09	1.50229	-8.74834	0.665652
NM_198610	Igsf21	214.593	0.586931	0.136516	4.29936	1.7129e-05	0.000186465	1.50205	-3.7294	0.665757
NM_016759	Rundc3a	116.669	0.585892	0.171419	3.41789	0.000631083	0.00419346	1.50097	-2.37743	0.666237
NM_173774	Slc45a1	161.951	0.585322	0.167597	3.49245	0.000478614	0.00331313	1.50037	-2.47976	0.6665
