# Supplementary material for: Activation of GCN2 kinase by ribosome stalling links translation elongation with translation initiation
Source: eLife. 2016 Apr 16;5:e14295. doi: 10.7554/eLife.14295 (PMC4917338; doi:10.7554/eLife.14295)
Supplement: Figure 3—source data 2. — DOI: http://dx.doi.org/10.7554/eLife.14295.016 [file elife-14295-fig3-data2.xlsx]

## Sheet: New ATF4 targets
Figure 3 --Source Data 2.
Identification of previously undescribed targets of ATF4 genes.
Previously undescribed targets of ATF4 genes were obtained from GCN2/ATF4 downstream 83 genes obtained in this study by comparing to the gene lists reported previously.
GCN2/ATF4 downstream genes		Han, J., et al. (2013)	Lange, P.S., et al. (2008)	Harding, H.P., et al. (2003)	Ebert, S.M., et al., (2012)	Undescribed targets of ATF4
83 genes		48 genes	17 genes	16 genes	26 genes	27 genes
NM_011819	Gdf15					+
NM_007515	Slc7a3		+		+
NM_144907	Sesn2	+			+
NM_007918	Eif4ebp1	+	+	+	+
NM_008638	Mthfd2	+	+	+	+
NM_026929	Chac1	+			+
NM_011491	Stc2	+	+		+
NM_022563	Ddr2	+			+
NM_028057	Cyb5r1	+		+	+
NM_030693	Atf5	+	+
NM_153543	Aldh1l2	+			+
NM_012055	Asns	+	+	+	+
NM_007513	Slc7a1	+
NM_009829	Ccnd2				+
NM_176933	Dusp4					+
NM_018861	Slc1a4	+	+		+
NM_001195265	Pdzd7					+
NM_009510	Ezr					+
NM_011404	Slc7a5	+	+	+	+
NM_019430	Cacng3					+
NM_028230	Shmt2	+	+		+
NM_022018	Fam129a	+
NM_133900	Psph			+	+
NM_024250	Phf10	+
NM_022331	Herpud1	+	+		+
NM_173867	Rcc2	+
NM_011812	Fbln5				+
NM_026271	Fibin	+
NM_027921	Slc16a14	+
NM_180678	Gars	+		+
NM_134137	Lars	+		+
NM_146200	Eif3c	+
NM_001081056	Xpot	+
NM_175093	Trib3	+	+		+
NM_007837	Ddit3	+
NM_016966	Phgdh	+	+
NM_134151	Yars	+		+
NM_198422	Paqr3	+			+
NM_178080	Pde4dip	+
NM_033074	Tars	+		+
NM_029735	Eprs	+
NM_053074	Nup62					+
NM_021461	Mknk1				+
NM_173866	Gpt2	+			+
NM_016701	Nes					+
NM_010442	Hmox1	+	+	+	+
NM_172015	Iars	+		+
NM_146217	Aars	+	+	+
NM_013885	Clic4	+		+
NM_023794	Etv5				+
NM_001033302	Gm129	+
NM_001045514	Akna	+
NM_009716	Atf4		+
NM_019578	Extl1					+
NM_010740	Cd93				+
NM_001159964	Eps15					+
NM_013805	Cldn5					+
NM_026609	Leprotl1	+
NM_011340	Serpinf1	+	+	+
NM_147776	Vwa1					+
NM_001166651	Klhl33					+
NM_183020	Atxn2l	+
NM_027280	Nkd1					+
NM_009931	Col4a1					+
NM_011299	Rps6ka2	+
NM_025522	Dhrs7	+	+
NM_001039385	Vgf					+
NM_008409	Itm2a					+
NM_145967	Vstm2a					+
NM_009063	Rgs5					+
NM_080708	Bmp2k					+
NM_028782	Lonp1	+		+	+
NM_026376	Plxnd1					+
NM_001081337	Sipa1l2					+
NM_028994	Pck2	+			+
NM_011587	Tie1					+
NM_133222	Eltd1					+
NM_007586	Calb2					+
NM_145154	Angptl6	+
NM_001081395	Amotl1					+
NM_016750	H2afz	+
NM_009932	Col4a2					+
NM_177897	B4galnt4					+

## Sheet: IPA
Figure 3 --Source Data 2.
IPA analysis of genes that reverted to wild type levels upon Gcn2 deletion
Upstream Regulator	Molecule Type	p-value of overlap	Mechanistic Network
ATF4	transcription regulator	8.16e-34
EIF2AK3	kinase	1.45e-26
UCP1	transporter	2.38e-20
TRIB3	kinase	8.18e-19	ATF4,TRIB3
ALDH2	enzyme	1.46e-17
EIF2AK4	kinase	2.32e-12
histidinol	chemical - endogenous mammalian	2.83e-12
tunicamycin	chemical - endogenous non-mammalian	5.01e-12	Jnk,NFkB (complex),TP53,tunicamycin
tosedostat	chemical drug	9.67e-12
MXI1	transcription regulator	2e-09
GNE	kinase	4.91e-09
thapsigargin	chemical toxicant	8.19e-09	ATF3,Jnk,NFkB (complex),TP53,thapsigargin
TGFB1	growth factor	2.58e-08	BRCA1,EZH2,IFNG,JUN,MYC,NFkB (complex),TGFB1,TP53
D-glucose	chemical - endogenous mammalian	2.98e-08	ATF4,CEBPA,D-glucose,FOXO3,MAP2K1/2,MYC,NFE2L2,NFkB (complex),PI3K (complex),PIK3R1,TP53,dexamethasone
CNB-001	chemical reagent	4.58e-08
L-serine	chemical - endogenous mammalian	4.58e-08
25-hydroxycholesterol	chemical reagent	8.19e-08
bexarotene	chemical drug	1.06e-07
dexamethasone	chemical drug	1.36e-07	AKT1,BRCA1,EGR1,EZH2,MAP2K1/2,MYC,NFkB (complex),TNF,TP53,dexamethasone
FOXO3	transcription regulator	1.38e-07	FOXO3,MXI1

## Sheet: KEGG analysis
Figure 3 --Source Data 2.
KEGG analysis of genes (83) that reverted to wild type levels upon Gcn2 deletion
Category	Term	PValue	Fold Enrichment	Bonferroni	Benjamini	FDR
KEGG_PATHWAY	mmu00970:Aminoacyl-tRNA biosynthesis	1.01569e-07	28.1275	4.67214e-06	4.67214e-06	9.60006e-05
KEGG_PATHWAY	mmu00260:Glycine, serine and threonine metabolism	0.0142855	15.8217	0.484116	0.281749	12.7155
KEGG_PATHWAY	mmu04010:MAPK signaling pathway	0.0166119	3.82109	0.537249	0.22652	14.6433
