# Supplementary material for: Activation of GCN2 kinase by ribosome stalling links translation elongation with translation initiation
Source: eLife. 2016 Apr 16;5:e14295. doi: 10.7554/eLife.14295 (PMC4917338; doi:10.7554/eLife.14295)
Supplement: Figure 3—source data 3. — DOI: http://dx.doi.org/10.7554/eLife.14295.017 [file elife-14295-fig3-data3.xlsx]

## Sheet: Further upregulated GO
Figure 3 -Source Data 3. GO analysis of 21 genes (see Fig. 3B) that were further upregulated by Gcn2 deletion among the upregulated genes in B6J-nmf205-/- cerebellum
Enrichment Score	Category	Term	Count	PValue	Fold Enrichment	Benjamini	FDR
2.07037	GOTERM_BP_FAT	GO:0006958~complement activation, classical pathway	3	0.000421814	90.5867	0.0820811	0.528698
	GOTERM_BP_FAT	GO:0002455~humoral immune response mediated by circulating immunoglobulin	3	0.000575268	77.6457	0.0567336	0.720397
	GOTERM_BP_FAT	GO:0002541~activation of plasma proteins involved in acute inflammatory response	3	0.000608749	75.4889	0.0403672	0.762177
	GOTERM_BP_FAT	GO:0006956~complement activation	3	0.000608749	75.4889	0.0403672	0.762177
	GOTERM_BP_FAT	GO:0006959~humoral immune response	3	0.00136816	50.3259	0.0671227	1.70549
	GOTERM_BP_FAT	GO:0016064~immunoglobulin mediated immune response	3	0.00185737	43.1365	0.0727012	2.3088
	GOTERM_BP_FAT	GO:0019724~B cell mediated immunity	3	0.00197583	41.8092	0.0647253	2.45437
	GOTERM_BP_FAT	GO:0051605~protein maturation by peptide bond cleavage	3	0.00197583	41.8092	0.0647253	2.45437
	GOTERM_BP_FAT	GO:0002449~lymphocyte mediated immunity	3	0.0026898	35.7579	0.0751368	3.32754
	GOTERM_BP_FAT	GO:0002526~acute inflammatory response	3	0.0030489	33.5506	0.0745583	3.76398
	GOTERM_BP_FAT	GO:0002250~adaptive immune response	3	0.00327461	32.3524	0.0713115	4.03738
	GOTERM_BP_FAT	GO:0002460~adaptive immune response based on somatic recombination of immune receptors built from immunoglobulin superfamily domains	3	0.00327461	32.3524	0.0713115	4.03738
	GOTERM_BP_FAT	GO:0002253~activation of immune response	3	0.00342933	31.6	0.0673591	4.22437
	GOTERM_BP_FAT	GO:0002443~leukocyte mediated immunity	3	0.00366774	30.5348	0.0655628	4.51185
	GOTERM_BP_FAT	GO:0016485~protein processing	3	0.00374889	30.1956	0.0615614	4.60953
	GOTERM_BP_FAT	GO:0051604~protein maturation	3	0.00425337	28.3083	0.0643928	5.21466
	GOTERM_BP_FAT	GO:0045087~innate immune response	3	0.00525556	25.3981	0.0735606	6.40636
	GOTERM_BP_FAT	GO:0002252~immune effector process	3	0.00721707	21.5683	0.0878023	8.69894
	GOTERM_BP_FAT	GO:0050778~positive regulation of immune response	3	0.00836375	19.9824	0.0954277	10.0151
	GOTERM_BP_FAT	GO:0048584~positive regulation of response to stimulus	3	0.0152217	14.6108	0.151158	17.5291
	GOTERM_BP_FAT	GO:0002684~positive regulation of immune system process	3	0.0184631	13.1922	0.172339	20.8755
	GOTERM_BP_FAT	GO:0006954~inflammatory response	3	0.0217909	12.0782	0.191823	24.1809
	GOTERM_BP_FAT	GO:0009611~response to wounding	3	0.0483319	7.8317	0.366889	46.3362
1.26152	GOTERM_BP_FAT	GO:0042254~ribosome biogenesis	3	0.00574373	24.2643	0.0749948	6.98182
	GOTERM_BP_FAT	GO:0022613~ribonucleoprotein complex biogenesis	3	0.00848268	19.8365	0.091603	10.1506
	GOTERM_CC_FAT	GO:0005730~nucleolus	3	0.0290686	10.0839	0.622235	22.7008

## Sheet: Further downregulated GO
Figure 3 -Source Datae 3. GO analysis of 32 genes (see Fig. 3B) that were further downregulated by Gcn2 deletion among the downregulated genes in B6J-nmf205-/- cerebellum
Enrichment Score	Category	Term	Count	PValue	Fold Enrichment	Benjamini	FDR
1.85966	GOTERM_MF_FAT	GO:0005083~small GTPase regulator activity	3	0.0477651	8.12556	0.723285	42.2027
1.28542	GOTERM_MF_FAT	GO:0046872~metal ion binding	13	0.00641103	2.03948	0.491009	6.95088
	GOTERM_MF_FAT	GO:0043169~cation binding	13	0.00694253	2.02111	0.306326	7.5069
	GOTERM_MF_FAT	GO:0043167~ion binding	13	0.00774769	1.99593	0.238317	8.34344

## Sheet: Triple mut up GO
Figure 3 -Source Data 3. GO analysis of 580 genes (see in text) that were upregulated in the B6J-nmf205-/-; Gcn2-/- cerebellum but not in the B6J-nmf205-/- cerebellum
Enrichment Score	Category	Term	Count	PValue	Fold Enrichment	Benjamini	FDR
24.7569	GOTERM_CC_FAT	GO:0031981~nuclear lumen	94	6.64381e-34	4.14678	2.29876e-31	9.07107e-31
	GOTERM_CC_FAT	GO:0031974~membrane-enclosed lumen	104	5.78102e-31	3.45072	1.00012e-28	7.89307e-28
	GOTERM_CC_FAT	GO:0070013~intracellular organelle lumen	101	3.51849e-30	3.47245	4.058e-28	4.80394e-27
	GOTERM_CC_FAT	GO:0043233~organelle lumen	101	4.37589e-30	3.46327	3.78515e-28	5.97459e-27
	GOTERM_CC_FAT	GO:0005730~nucleolus	49	1.99378e-24	6.15713	1.3797e-22	2.7222e-21
	GOTERM_CC_FAT	GO:0005654~nucleoplasm	55	3.33116e-16	3.57668	1.64313e-14	4.55191e-13
	GOTERM_CC_FAT	GO:0044451~nucleoplasm part	45	1.28107e-12	3.41695	4.43255e-11	1.74912e-09
15.93	GOTERM_CC_FAT	GO:0005730~nucleolus	49	1.99378e-24	6.15713	1.3797e-22	2.7222e-21
	GOTERM_CC_FAT	GO:0043232~intracellular non-membrane-bounded organelle	100	9.0197e-13	2.02987	3.46748e-11	1.23146e-09
	GOTERM_CC_FAT	GO:0043228~non-membrane-bounded organelle	100	9.0197e-13	2.02987	3.46748e-11	1.23146e-09
14.7664	GOTERM_CC_FAT	GO:0030529~ribonucleoprotein complex	54	1.06536e-20	4.55298	6.1436e-19	1.45459e-17
	GOTERM_BP_FAT	GO:0006396~RNA processing	52	1.8294e-18	4.24378	2.87032e-15	3.05614e-15
	GOTERM_BP_FAT	GO:0006397~mRNA processing	36	1.14226e-14	4.9004	8.97105e-12	1.91069e-11
	GOTERM_BP_FAT	GO:0016071~mRNA metabolic process	38	3.09176e-14	4.48753	1.6142e-11	5.15588e-11
	GOTERM_BP_FAT	GO:0008380~RNA splicing	31	4.99954e-14	5.50042	1.95968e-11	8.34666e-11
	GOTERM_CC_FAT	GO:0005681~spliceosome	24	6.6166e-14	7.53934	2.86182e-12	9.03388e-11
4.9551	GOTERM_BP_FAT	GO:0022613~ribonucleoprotein complex biogenesis	21	1.35498e-09	5.46675	4.25194e-07	2.2636e-06
	GOTERM_BP_FAT	GO:0042254~ribosome biogenesis	18	1.30265e-08	5.73172	2.91978e-06	2.17617e-05
	GOTERM_BP_FAT	GO:0006364~rRNA processing	11	3.78976e-05	5.30141	0.00658516	0.0632919
	GOTERM_BP_FAT	GO:0016072~rRNA metabolic process	11	4.26567e-05	5.23073	0.00667063	0.0712373
	GOTERM_BP_FAT	GO:0034660~ncRNA metabolic process	16	0.000563268	2.82487	0.0572314	0.93683
	GOTERM_BP_FAT	GO:0034470~ncRNA processing	12	0.00487085	2.70866	0.201743	7.83318
4.14064	GOTERM_BP_FAT	GO:0006350~transcription	92	3.1434e-09	1.85163	8.21999e-07	5.25128e-06
	GOTERM_BP_FAT	GO:0045449~regulation of transcription	97	4.92777e-06	1.5534	0.000965995	0.00823189
	GOTERM_MF_FAT	GO:0030528~transcription regulator activity	46	0.0186148	1.39625	0.35563	23.2055
	GOTERM_MF_FAT	GO:0003677~DNA binding	61	0.0461024	1.25377	0.578504	48.4817
3.99981	GOTERM_MF_FAT	GO:0000166~nucleotide binding	95	1.95051e-06	1.59303	0.000410499	0.0027408
	GOTERM_MF_FAT	GO:0032553~ribonucleotide binding	77	4.65957e-05	1.56941	0.00279854	0.0654559
	GOTERM_MF_FAT	GO:0032555~purine ribonucleotide binding	77	4.65957e-05	1.56941	0.00279854	0.0654559
	GOTERM_MF_FAT	GO:0005524~ATP binding	65	5.32856e-05	1.64892	0.0028003	0.0748503
	GOTERM_MF_FAT	GO:0017076~purine nucleotide binding	79	5.93383e-05	1.54563	0.00277195	0.0833492
	GOTERM_MF_FAT	GO:0032559~adenyl ribonucleotide binding	65	7.61804e-05	1.62972	0.00320218	0.106995
	GOTERM_MF_FAT	GO:0001882~nucleoside binding	68	8.92304e-05	1.5977	0.00312574	0.125313
	GOTERM_MF_FAT	GO:0030554~adenyl nucleotide binding	67	0.000102024	1.59779	0.00329871	0.143267
	GOTERM_MF_FAT	GO:0001883~purine nucleoside binding	67	0.000133186	1.58437	0.00399735	0.186989
3.59433	GOTERM_BP_FAT	GO:0006412~translation	23	9.40731e-05	2.57139	0.0133292	0.15704
	GOTERM_CC_FAT	GO:0005852~eukaryotic translation initiation factor 3 complex	5	0.000177117	16.2305	0.0033991	0.241555
	GOTERM_MF_FAT	GO:0003743~translation initiation factor activity	9	0.000262827	5.31378	0.00735051	0.368689
	GOTERM_MF_FAT	GO:0008135~translation factor activity, nucleic acid binding	10	0.00139504	3.73531	0.036066	1.94254
	GOTERM_BP_FAT	GO:0006413~translational initiation	6	0.00391335	5.63116	0.185409	6.34044
3.32424	GOTERM_MF_FAT	GO:0004386~helicase activity	16	2.2569e-06	4.54029	0.000316668	0.00317132
	GOTERM_MF_FAT	GO:0016887~ATPase activity	23	9.09481e-06	2.99623	0.000956775	0.0127792
	GOTERM_MF_FAT	GO:0070035~purine NTP-dependent helicase activity	12	2.07007e-05	5.10782	0.0017415	0.0290845
	GOTERM_MF_FAT	GO:0008026~ATP-dependent helicase activity	12	2.07007e-05	5.10782	0.0017415	0.0290845
	GOTERM_MF_FAT	GO:0042623~ATPase activity, coupled	19	3.98006e-05	3.1189	0.00278884	0.0559128
2.89989	GOTERM_MF_FAT	GO:0008270~zinc ion binding	86	8.06284e-05	1.49554	0.00308124	0.113238
	GOTERM_MF_FAT	GO:0046914~transition metal ion binding	94	0.00258008	1.31939	0.061974	3.56509
2.45883	GOTERM_BP_FAT	GO:0000377~RNA splicing, via transesterification reactions with bulged adenosine as nucleophile	6	0.00347672	5.78336	0.177297	5.65222
	GOTERM_BP_FAT	GO:0000375~RNA splicing, via transesterification reactions	6	0.00347672	5.78336	0.177297	5.65222
	GOTERM_BP_FAT	GO:0000398~nuclear mRNA splicing, via spliceosome	6	0.00347672	5.78336	0.177297	5.65222
2.41314	GOTERM_BP_FAT	GO:0009057~macromolecule catabolic process	34	0.000767079	1.85409	0.0724889	1.27377
	GOTERM_BP_FAT	GO:0030163~protein catabolic process	30	0.0009584	1.92432	0.0846942	1.58908
	GOTERM_BP_FAT	GO:0006511~ubiquitin-dependent protein catabolic process	12	0.00202585	3.03524	0.140594	3.33103
	GOTERM_BP_FAT	GO:0019941~modification-dependent protein catabolic process	27	0.00224718	1.89553	0.142273	3.68856
	GOTERM_BP_FAT	GO:0043632~modification-dependent macromolecule catabolic process	27	0.00224718	1.89553	0.142273	3.68856
	GOTERM_BP_FAT	GO:0044265~cellular macromolecule catabolic process	30	0.00368961	1.75685	0.181261	5.98837
	GOTERM_BP_FAT	GO:0051603~proteolysis involved in cellular protein catabolic process	27	0.00442599	1.80324	0.195467	7.14244
	GOTERM_BP_FAT	GO:0044257~cellular protein catabolic process	27	0.00471087	1.79316	0.201092	7.58534
2.37244	GOTERM_BP_FAT	GO:0006270~DNA replication initiation	4	0.00224931	14.2656	0.136891	3.69199
	GOTERM_BP_FAT	GO:0006261~DNA-dependent DNA replication	6	0.00237656	6.29365	0.138715	3.89697
	GOTERM_BP_FAT	GO:0006268~DNA unwinding during replication	4	0.00302905	12.9687	0.161624	4.94165
	GOTERM_BP_FAT	GO:0032508~DNA duplex unwinding	4	0.0039556	11.888	0.181762	6.40679
	GOTERM_BP_FAT	GO:0032392~DNA geometric change	4	0.00503659	10.9736	0.197534	8.08929
2.275	GOTERM_CC_FAT	GO:0005694~chromosome	25	4.01493e-05	2.57627	0.0009257	0.0548036
	GOTERM_CC_FAT	GO:0044427~chromosomal part	21	0.000200773	2.57239	0.00364987	0.273776
	GOTERM_CC_FAT	GO:0000228~nuclear chromosome	10	0.00387139	3.21928	0.059181	5.15823
	GOTERM_CC_FAT	GO:0044454~nuclear chromosome part	9	0.00488268	3.40368	0.0709868	6.46444
	GOTERM_CC_FAT	GO:0000785~chromatin	11	0.00996647	2.59688	0.129448	12.782
	GOTERM_CC_FAT	GO:0000790~nuclear chromatin	6	0.0130164	4.24945	0.144714	16.3799
2.14628	GOTERM_BP_FAT	GO:0006457~protein folding	11	0.00298615	3.08901	0.165124	4.8733
	GOTERM_CC_FAT	GO:0005832~chaperonin-containing T-complex	3	0.0125926	16.6943	0.144951	15.8883
	GOTERM_MF_FAT	GO:0051082~unfolded protein binding	6	0.0418474	3.13766	0.575567	45.1569
2.08261	GOTERM_MF_FAT	GO:0008270~zinc ion binding	86	8.06284e-05	1.49554	0.00308124	0.113238
	GOTERM_MF_FAT	GO:0046914~transition metal ion binding	94	0.00258008	1.31939	0.061974	3.56509
2.02898	GOTERM_CC_FAT	GO:0016591~DNA-directed RNA polymerase II, holoenzyme	9	8.21506e-05	6.26035	0.001775	0.112105
	GOTERM_BP_FAT	GO:0006351~transcription, DNA-dependent	13	0.000156767	3.80027	0.0202903	0.261569
	GOTERM_BP_FAT	GO:0006366~transcription from RNA polymerase II promoter	10	0.000211252	4.81947	0.0251768	0.352327
	GOTERM_BP_FAT	GO:0032774~RNA biosynthetic process	13	0.000212769	3.67962	0.0235658	0.354854
	GOTERM_BP_FAT	GO:0043933~macromolecular complex subunit organization	20	0.00751778	1.94354	0.250823	11.8442
	GOTERM_BP_FAT	GO:0034621~cellular macromolecular complex subunit organization	15	0.00914824	2.18351	0.279435	14.2326
	GOTERM_CC_FAT	GO:0005669~transcription factor TFIID complex	4	0.0118711	8.20069	0.141901	15.0452
	GOTERM_BP_FAT	GO:0006367~transcription initiation from RNA polymerase II promoter	4	0.0129587	7.92534	0.359108	19.5794
	GOTERM_CC_FAT	GO:0005667~transcription factor complex	13	0.0174143	2.16407	0.178053	21.3262
	GOTERM_BP_FAT	GO:0006352~transcription initiation	5	0.0192127	4.81947	0.449443	27.6812
	GOTERM_BP_FAT	GO:0065003~macromolecular complex assembly	17	0.028635	1.79375	0.538195	38.4519
	GOTERM_BP_FAT	GO:0034622~cellular macromolecular complex assembly	12	0.0418134	1.97221	0.62676	51.0097
1.93179	GOTERM_CC_FAT	GO:0000502~proteasome complex	6	0.0161199	4.02965	0.170914	19.8993
1.92968	GOTERM_CC_FAT	GO:0005840~ribosome	12	0.0105226	2.43458	0.131314	13.4485
1.84626	GOTERM_CC_FAT	GO:0005643~nuclear pore	11	2.16309e-06	7.26247	6.23673e-05	0.00295332
	GOTERM_CC_FAT	GO:0046930~pore complex	11	1.55814e-05	5.86967	0.000385012	0.0212719
	GOTERM_CC_FAT	GO:0005635~nuclear envelope	13	0.000564398	3.30976	0.00971931	0.767851
	GOTERM_CC_FAT	GO:0031080~Nup107-160 complex	4	0.000845126	19.4766	0.0138338	1.14774
	GOTERM_CC_FAT	GO:0012505~endomembrane system	25	0.00551724	1.82025	0.0766625	7.27553
	GOTERM_CC_FAT	GO:0000776~kinetochore	6	0.0209733	3.76967	0.199277	25.1289
	GOTERM_CC_FAT	GO:0000775~chromosome, centromeric region	8	0.0238061	2.80744	0.211945	28.0333
	GOTERM_BP_FAT	GO:0051028~mRNA transport	6	0.0293625	3.45136	0.541286	39.2175
	GOTERM_BP_FAT	GO:0051236~establishment of RNA localization	6	0.0370924	3.24219	0.604117	46.8175
	GOTERM_BP_FAT	GO:0050658~RNA transport	6	0.0370924	3.24219	0.604117	46.8175
	GOTERM_BP_FAT	GO:0050657~nucleic acid transport	6	0.0370924	3.24219	0.604117	46.8175
	GOTERM_BP_FAT	GO:0006403~RNA localization	6	0.039202	3.19379	0.613528	48.7308
1.67216	GOTERM_BP_FAT	GO:0032446~protein modification by small protein conjugation	8	0.00652583	3.61155	0.231565	10.3607
	GOTERM_BP_FAT	GO:0070647~protein modification by small protein conjugation or removal	9	0.00869613	3.08631	0.278399	13.5765
	GOTERM_BP_FAT	GO:0016567~protein ubiquitination	7	0.0101876	3.78255	0.300247	15.7232
	GOTERM_MF_FAT	GO:0019787~small conjugating protein ligase activity	9	0.020985	2.63564	0.374955	25.7711
	GOTERM_MF_FAT	GO:0004842~ubiquitin-protein ligase activity	8	0.023462	2.81585	0.393325	28.367
1.65039	GOTERM_BP_FAT	GO:0015031~protein transport	33	0.00140627	1.80785	0.115441	2.32351
	GOTERM_BP_FAT	GO:0045184~establishment of protein localization	33	0.00159119	1.79408	0.123224	2.62524
	GOTERM_BP_FAT	GO:0008104~protein localization	36	0.00219542	1.70505	0.145079	3.60506
	GOTERM_BP_FAT	GO:0006913~nucleocytoplasmic transport	9	0.00542138	3.3435	0.205881	8.6813
	GOTERM_BP_FAT	GO:0051169~nuclear transport	9	0.00613288	3.27527	0.22431	9.76652
	GOTERM_BP_FAT	GO:0034504~protein localization in nucleus	7	0.00699082	4.09259	0.240563	11.059
	GOTERM_BP_FAT	GO:0033365~protein localization in organelle	8	0.0189377	2.94136	0.451169	27.3417
	GOTERM_BP_FAT	GO:0046907~intracellular transport	20	0.0342894	1.65494	0.59239	44.1712
	GOTERM_BP_FAT	GO:0034613~cellular protein localization	15	0.0424873	1.78917	0.622107	51.5821
	GOTERM_BP_FAT	GO:0070727~cellular macromolecule localization	15	0.0439378	1.77728	0.629514	52.793
1.6119	GOTERM_BP_FAT	GO:0006457~protein folding	11	0.00298615	3.08901	0.165124	4.8733
1.50804	GOTERM_BP_FAT	GO:0006338~chromatin remodeling	5	0.0159076	5.09486	0.407947	23.5004
	GOTERM_BP_FAT	GO:0006325~chromatin organization	17	0.0159952	1.92473	0.403284	23.6141
	GOTERM_BP_FAT	GO:0051276~chromosome organization	20	0.0193303	1.76555	0.4451	27.8259
	GOTERM_CC_FAT	GO:0016585~chromatin remodeling complex	5	0.038592	3.89533	0.294721	41.5705
1.3931	GOTERM_BP_FAT	GO:0007049~cell cycle	31	0.00200005	1.80947	0.145348	3.28926
	GOTERM_BP_FAT	GO:0000278~mitotic cell cycle	14	0.0199533	2.0463	0.449356	28.5881
	GOTERM_BP_FAT	GO:0051301~cell division	15	0.0268207	1.90377	0.526857	36.5031
1.10455	GOTERM_CC_FAT	GO:0016585~chromatin remodeling complex	5	0.038592	3.89533	0.294721	41.5705
1.036	GOTERM_BP_FAT	GO:0043414~biopolymer methylation	6	0.0483604	3.01386	0.655407	56.3115
1.03038	GOTERM_BP_FAT	GO:0002708~positive regulation of lymphocyte mediated immunity	6	0.00490192	5.34961	0.197711	7.88124
	GOTERM_BP_FAT	GO:0002705~positive regulation of leukocyte mediated immunity	6	0.00490192	5.34961	0.197711	7.88124
	GOTERM_BP_FAT	GO:0002699~positive regulation of immune effector process	6	0.00891243	4.65183	0.278669	13.891
	GOTERM_BP_FAT	GO:0002824~positive regulation of adaptive immune response based on somatic recombination of immune receptors built from immunoglobulin superfamily domains	5	0.0143993	5.24471	0.383802	21.5179
	GOTERM_BP_FAT	GO:0002821~positive regulation of adaptive immune response	5	0.0143993	5.24471	0.383802	21.5179
	GOTERM_BP_FAT	GO:0002478~antigen processing and presentation of exogenous peptide antigen	4	0.0253821	6.20244	0.51341	34.9167
	GOTERM_BP_FAT	GO:0002706~regulation of lymphocyte mediated immunity	6	0.0350542	3.29207	0.594655	44.9053
	GOTERM_BP_FAT	GO:0050778~positive regulation of immune response	9	0.0371929	2.36012	0.599444	46.9102
	GOTERM_BP_FAT	GO:0019884~antigen processing and presentation of exogenous antigen	4	0.0424068	5.09486	0.626686	51.5141
	GOTERM_BP_FAT	GO:0002703~regulation of leukocyte mediated immunity	6	0.0459623	3.05692	0.641327	54.4354

## Sheet: Triple mut down GO
Figure 3-Source Data 3. GO analysis of 547 genes (see in text) that were downregulated in the B6J-nmf205-/-; Gcn2-/- cerebellum but not in the B6J-nmf205-/- cerebellum
Enrichment Score	Category	Term	Count	PValue	Fold Enrichment	Benjamini	FDR
4.17559	GOTERM_CC_FAT	GO:0045202~synapse	26	1.76246e-08	3.83133	4.49426e-06	2.29674e-05
	GOTERM_CC_FAT	GO:0044456~synapse part	16	4.57749e-05	3.54774	0.00291397	0.0596348
	GOTERM_CC_FAT	GO:0030054~cell junction	25	6.23796e-05	2.5004	0.00317641	0.0812591
	GOTERM_CC_FAT	GO:0045211~postsynaptic membrane	11	0.000343436	4.10383	0.0124351	0.446622
	GOTERM_CC_FAT	GO:0044459~plasma membrane part	53	0.00154855	1.52566	0.0429595	1.99929
2.8904	GOTERM_BP_FAT	GO:0048667~cell morphogenesis involved in neuron differentiation	14	2.48777e-05	4.26625	0.0298952	0.0402941
	GOTERM_BP_FAT	GO:0000904~cell morphogenesis involved in differentiation	14	0.000119809	3.66253	0.0358843	0.193913
	GOTERM_BP_FAT	GO:0031175~neuron projection development	14	0.000158273	3.56173	0.0378854	0.256093
	GOTERM_BP_FAT	GO:0048858~cell projection morphogenesis	13	0.000291243	3.56929	0.0575082	0.470769
	GOTERM_BP_FAT	GO:0048812~neuron projection morphogenesis	12	0.000338157	3.78145	0.0572423	0.546407
	GOTERM_BP_FAT	GO:0032990~cell part morphogenesis	13	0.000453359	3.40092	0.0668161	0.731914
	GOTERM_BP_FAT	GO:0007409~axonogenesis	11	0.000724309	3.74278	0.0710169	1.16694
	GOTERM_BP_FAT	GO:0048666~neuron development	15	0.00082591	2.84904	0.0694709	1.3296
	GOTERM_BP_FAT	GO:0030182~neuron differentiation	18	0.000889322	2.50201	0.0698075	1.431
	GOTERM_BP_FAT	GO:0030030~cell projection organization	15	0.00190265	2.60789	0.135164	3.03812
	GOTERM_BP_FAT	GO:0000902~cell morphogenesis	14	0.00386156	2.51281	0.230669	6.07542
	GOTERM_BP_FAT	GO:0032989~cellular component morphogenesis	14	0.0109848	2.21213	0.416683	16.3842
	GOTERM_CC_FAT	GO:0043025~cell soma	8	0.012204	3.21419	0.214048	14.7868
	GOTERM_BP_FAT	GO:0007411~axon guidance	6	0.0316347	3.39559	0.653526	40.5932
2.85285	GOTERM_BP_FAT	GO:0019226~transmission of nerve impulse	15	5.89278e-05	3.68105	0.0353086	0.09542
	GOTERM_BP_FAT	GO:0007268~synaptic transmission	13	8.91037e-05	4.05054	0.0355884	0.14425
	GOTERM_BP_FAT	GO:0007267~cell-cell signaling	15	0.000768802	2.86868	0.0696337	1.2382
2.36288	GOTERM_BP_FAT	GO:0007155~cell adhesion	23	0.000507704	2.27381	0.0600754	0.819311
	GOTERM_BP_FAT	GO:0022610~biological adhesion	23	0.000513924	2.26977	0.0554187	0.829309
2.11961	GOTERM_MF_FAT	GO:0022838~substrate specific channel activity	21	6.31076e-06	3.28446	0.00288616	0.00897522
	GOTERM_MF_FAT	GO:0015267~channel activity	21	7.67798e-06	3.23947	0.00175672	0.0109196
	GOTERM_MF_FAT	GO:0022803~passive transmembrane transporter activity	21	7.67798e-06	3.23947	0.00175672	0.0109196
	GOTERM_MF_FAT	GO:0005216~ion channel activity	20	1.43626e-05	3.22665	0.0021903	0.0204255
	GOTERM_MF_FAT	GO:0022836~gated channel activity	16	0.000144496	3.20598	0.0164098	0.205316
	GOTERM_MF_FAT	GO:0005261~cation channel activity	14	0.000476735	3.17851	0.0357449	0.675912
	GOTERM_MF_FAT	GO:0046873~metal ion transmembrane transporter activity	15	0.000662112	2.91233	0.0424098	0.93759
	GOTERM_BP_FAT	GO:0006811~ion transport	25	0.00225559	1.94737	0.149605	3.59206
	GOTERM_BP_FAT	GO:0006816~calcium ion transport	7	0.0219088	3.2085	0.593781	30.1532
	GOTERM_MF_FAT	GO:0005267~potassium channel activity	7	0.0270391	3.05531	0.48354	32.285
	GOTERM_BP_FAT	GO:0030001~metal ion transport	15	0.0285722	1.88217	0.646605	37.4753
	GOTERM_MF_FAT	GO:0022832~voltage-gated channel activity	8	0.0399681	2.51643	0.452625	44.0172
	GOTERM_MF_FAT	GO:0005244~voltage-gated ion channel activity	8	0.0399681	2.51643	0.452625	44.0172
	GOTERM_BP_FAT	GO:0006812~cation transport	16	0.0449052	1.72307	0.720267	52.4933
	GOTERM_BP_FAT	GO:0015672~monovalent inorganic cation transport	11	0.0468045	2.01344	0.71954	54.0008
1.88151	GOTERM_MF_FAT	GO:0016831~carboxy-lyase activity	5	0.00121525	10.4269	0.0672472	1.71459
1.57345	GOTERM_CC_FAT	GO:0045211~postsynaptic membrane	11	0.000343436	4.10383	0.0124351	0.446622
	GOTERM_MF_FAT	GO:0008066~glutamate receptor activity	5	0.00439186	7.40856	0.18257	6.06824
	GOTERM_MF_FAT	GO:0005230~extracellular ligand-gated ion channel activity	5	0.0292812	4.26554	0.476985	34.4709
	GOTERM_CC_FAT	GO:0008328~ionotropic glutamate receptor complex	3	0.0344294	10.073	0.321888	36.6547
	GOTERM_MF_FAT	GO:0004970~ionotropic glutamate receptor activity	3	0.0395601	9.38418	0.471372	43.6778
	GOTERM_MF_FAT	GO:0005234~extracellular-glutamate-gated ion channel activity	3	0.0395601	9.38418	0.471372	43.6778
	GOTERM_MF_FAT	GO:0015276~ligand-gated ion channel activity	6	0.0398938	3.18708	0.462876	43.9555
	GOTERM_MF_FAT	GO:0022834~ligand-gated channel activity	6	0.0398938	3.18708	0.462876	43.9555
1.54386	GOTERM_CC_FAT	GO:0031410~cytoplasmic vesicle	19	0.0231066	1.75816	0.311047	26.2615
	GOTERM_CC_FAT	GO:0031982~vesicle	19	0.0276403	1.72089	0.327723	30.5987
	GOTERM_CC_FAT	GO:0016023~cytoplasmic membrane-bounded vesicle	16	0.0306259	1.81672	0.327387	33.3249
	GOTERM_CC_FAT	GO:0031988~membrane-bounded vesicle	16	0.0341345	1.79076	0.331394	36.4021
1.50946	GOTERM_CC_FAT	GO:0034707~chloride channel complex	5	0.0211889	4.70075	0.305166	24.3527
	GOTERM_MF_FAT	GO:0005254~chloride channel activity	5	0.0265208	4.39883	0.495364	31.7702
	GOTERM_MF_FAT	GO:0008509~anion transmembrane transporter activity	7	0.0279446	3.03181	0.477455	33.1759
	GOTERM_MF_FAT	GO:0031404~chloride ion binding	5	0.0322058	4.14008	0.464582	37.2236
	GOTERM_MF_FAT	GO:0005253~anion channel activity	5	0.03373	4.08008	0.46666	38.6152
	GOTERM_MF_FAT	GO:0043168~anion binding	5	0.0352957	4.02179	0.456399	40.0148
1.30261	GOTERM_BP_FAT	GO:0016055~Wnt receptor signaling pathway	7	0.0298207	2.98637	0.651904	38.7645
1.30026	GOTERM_CC_FAT	GO:0019717~synaptosome	7	0.00268507	4.98565	0.0604258	3.44306
1.1926	GOTERM_MF_FAT	GO:0005525~GTP binding	15	0.00422583	2.38581	0.193865	5.84521
	GOTERM_MF_FAT	GO:0019001~guanyl nucleotide binding	15	0.00533797	2.32666	0.199764	7.32984
	GOTERM_MF_FAT	GO:0032561~guanyl ribonucleotide binding	15	0.00533797	2.32666	0.199764	7.32984
	GOTERM_BP_FAT	GO:0007264~small GTPase mediated signal transduction	10	0.0435635	2.14966	0.725775	51.4006
1.1211	GOTERM_MF_FAT	GO:0003746~translation elongation factor activity	4	0.0170458	7.26517	0.408417	21.6926
1.11562	GOTERM_BP_FAT	GO:0031345~negative regulation of cell projection organization	4	0.00520158	11.0922	0.272488	8.10147
	GOTERM_BP_FAT	GO:0051129~negative regulation of cellular component organization	7	0.00655074	4.1745	0.305431	10.0999
	GOTERM_BP_FAT	GO:0010975~regulation of neuron projection development	5	0.00988653	5.90013	0.409642	14.8672
	GOTERM_BP_FAT	GO:0031344~regulation of cell projection organization	5	0.0190655	4.86502	0.567742	26.7903
1.09581	GOTERM_BP_FAT	GO:0006779~porphyrin biosynthetic process	3	0.040674	9.24354	0.718181	48.9667
	GOTERM_BP_FAT	GO:0033014~tetrapyrrole biosynthetic process	3	0.040674	9.24354	0.718181	48.9667
1.0814	GOTERM_BP_FAT	GO:0021697~cerebellar cortex formation	3	0.0253515	11.8845	0.612997	34.0312
	GOTERM_BP_FAT	GO:0021696~cerebellar cortex morphogenesis	3	0.040674	9.24354	0.718181	48.9667
1.03558	GOTERM_CC_FAT	GO:0005856~cytoskeleton	35	0.021184	1.46637	0.322941	24.3478
	GOTERM_CC_FAT	GO:0044430~cytoskeletal part	26	0.0232736	1.57906	0.297585	26.4256
	GOTERM_CC_FAT	GO:0015630~microtubule cytoskeleton	17	0.030305	1.77584	0.338348	33.0367
1.02232	GOTERM_MF_FAT	GO:0030695~GTPase regulator activity	14	0.0120493	2.18358	0.370403	15.837
	GOTERM_MF_FAT	GO:0008047~enzyme activator activity	11	0.0132574	2.48737	0.375117	17.2889
	GOTERM_MF_FAT	GO:0060589~nucleoside-triphosphatase regulator activity	14	0.0136182	2.14788	0.361461	17.7181
	GOTERM_MF_FAT	GO:0005083~small GTPase regulator activity	10	0.0178048	2.52489	0.402054	22.5482
	GOTERM_BP_FAT	GO:0051056~regulation of small GTPase mediated signal transduction	10	0.0221169	2.43251	0.585291	30.3936
	GOTERM_BP_FAT	GO:0046578~regulation of Ras protein signal transduction	8	0.0449828	2.45132	0.712868	52.5558
0.985586	GOTERM_CC_FAT	GO:0015630~microtubule cytoskeleton	17	0.030305	1.77584	0.338348	33.0367
0.97236	GOTERM_BP_FAT	GO:0001505~regulation of neurotransmitter levels	5	0.0251337	4.47268	0.621095	33.792
0.961128	GOTERM_MF_FAT	GO:0004672~protein kinase activity	18	0.0298458	1.73841	0.467832	35.0109
	GOTERM_MF_FAT	GO:0032555~purine ribonucleotide binding	43	0.03395	1.34806	0.455796	38.8137
	GOTERM_MF_FAT	GO:0032553~ribonucleotide binding	43	0.03395	1.34806	0.455796	38.8137
	GOTERM_MF_FAT	GO:0004674~protein serine/threonine kinase activity	14	0.0366666	1.87238	0.45721	41.2159
0.841485	GOTERM_BP_FAT	GO:0010970~microtubule-based transport	3	0.040674	9.24354	0.718181	48.9667
0.828769	GOTERM_MF_FAT	GO:0005267~potassium channel activity	7	0.0270391	3.05531	0.48354	32.285
0.826373	GOTERM_BP_FAT	GO:0050804~regulation of synaptic transmission	6	0.034091	3.32767	0.662111	42.9878
	GOTERM_BP_FAT	GO:0051969~regulation of transmission of nerve impulse	6	0.0436023	3.10998	0.717724	51.4326
	GOTERM_BP_FAT	GO:0060079~regulation of excitatory postsynaptic membrane potential	3	0.0493466	8.31918	0.731148	55.9484
0.809388	GOTERM_MF_FAT	GO:0005509~calcium ion binding	30	0.000414779	2.0109	0.0372886	0.588312

## Sheet: Further upregulated Kegg
Figure 3 -Source Data 3. Kegg analysis of 21 genes (see Fig. 3B) that were further upregulated by Gcn2 deletion among the upregulated genes in B6J-nmf205-/- cerebellum
Category	Term	Count	PValue	Fold Enrichment	Benjamini	FDR
KEGG_PATHWAY	mmu05020:Prion diseases	3	0.000989134	54.6476	0.0147347	0.685683
KEGG_PATHWAY	mmu04610:Complement and coagulation cascades	3	0.00448596	25.5022	0.0331582	3.07757
KEGG_PATHWAY	mmu05322:Systemic lupus erythematosus	3	0.00832695	18.5696	0.0409471	5.64787

## Sheet: Further downregulated Kegg
Figure 3 -Source Data 3. Kegg analysis of 32 genes (see Fig. 3B) that were further downregulated by Gcn2 deletion among the downregulated genes in B6J-nmf205-/- cerebellum
Category	Term	Count	PValue	Fold Enrichment	Benjamini	FDR
KEGG_PATHWAY	mmu04144:Endocytosis	3	0.0300205	9.46865	0.239914	16.0891

## Sheet: Triple mut up Kegg
Figure 3 -Source Data 3. Kegg analysis of 580 genes (see in text) that were upregulated in the B6J-nmf205-/-; Gcn2-/- cerebellum but not in the B6J-nmf205-/- cerebellum
Category	Term	Count	PValue	Fold Enrichment	Benjamini	FDR
KEGG_PATHWAY	mmu03040:Spliceosome	29	1.00477e-19	9.12892	1.0751e-17	1.12942e-16
KEGG_PATHWAY	mmu04110:Cell cycle	12	0.000376116	3.65944	0.0199248	0.421964
KEGG_PATHWAY	mmu03022:Basal transcription factors	6	0.00132996	7.09709	0.0463579	1.48482
KEGG_PATHWAY	mmu03050:Proteasome	6	0.00646504	4.98307	0.159284	7.03127
KEGG_PATHWAY	mmu03030:DNA replication	4	0.0584094	4.46103	0.724165	49.1613
KEGG_PATHWAY	mmu03018:RNA degradation	5	0.0655774	3.25283	0.701675	53.346
KEGG_PATHWAY	mmu04114:Oocyte meiosis	7	0.0720802	2.37598	0.681306	56.8682

## Sheet: Triple mut down Kegg
Figure 3 -Source Data 3. Kegg analysis of 547 genes (see in text) that were downregulated in the B6J-nmf205-/-; Gcn2-/- cerebellum but not in the B6J-nmf205-/- cerebellum
Category	Term	Count	PValue	Fold Enrichment	Benjamini	FDR
KEGG_PATHWAY	mmu04070:Phosphatidylinositol signaling system	7	0.00157158	5.46476	0.158871	1.76132
KEGG_PATHWAY	mmu04310:Wnt signaling pathway	8	0.0126496	3.14368	0.503498	13.3965
KEGG_PATHWAY	mmu00562:Inositol phosphate metabolism	5	0.0127285	5.42139	0.374815	13.4747
KEGG_PATHWAY	mmu04916:Melanogenesis	6	0.0265456	3.51306	0.522824	26.2118
KEGG_PATHWAY	mmu04720:Long-term potentiation	5	0.0301111	4.18222	0.489632	29.2084
KEGG_PATHWAY	mmu05210:Colorectal cancer	5	0.0570053	3.40413	0.659067	48.4772
KEGG_PATHWAY	mmu05217:Basal cell carcinoma	4	0.0653956	4.25826	0.654509	53.4257
KEGG_PATHWAY	mmu04080:Neuroactive ligand-receptor interaction	9	0.0718234	2.02677	0.641144	56.9193
KEGG_PATHWAY	mmu04912:GnRH signaling pathway	5	0.0810628	3.01809	0.644146	61.5236
KEGG_PATHWAY	mmu04910:Insulin signaling pathway	6	0.0834888	2.5457	0.61672	62.6558
KEGG_PATHWAY	mmu05010:Alzheimer's disease	7	0.0868035	2.25196	0.596687	64.1536
