# Supplementary figures and images for: Activation of GCN2 kinase by ribosome stalling links translation elongation with translation initiation
Source: eLife journal article supplement (doi:10.7554/elife.14295), 2016-04-16

Figure 1-figure supplement 1.

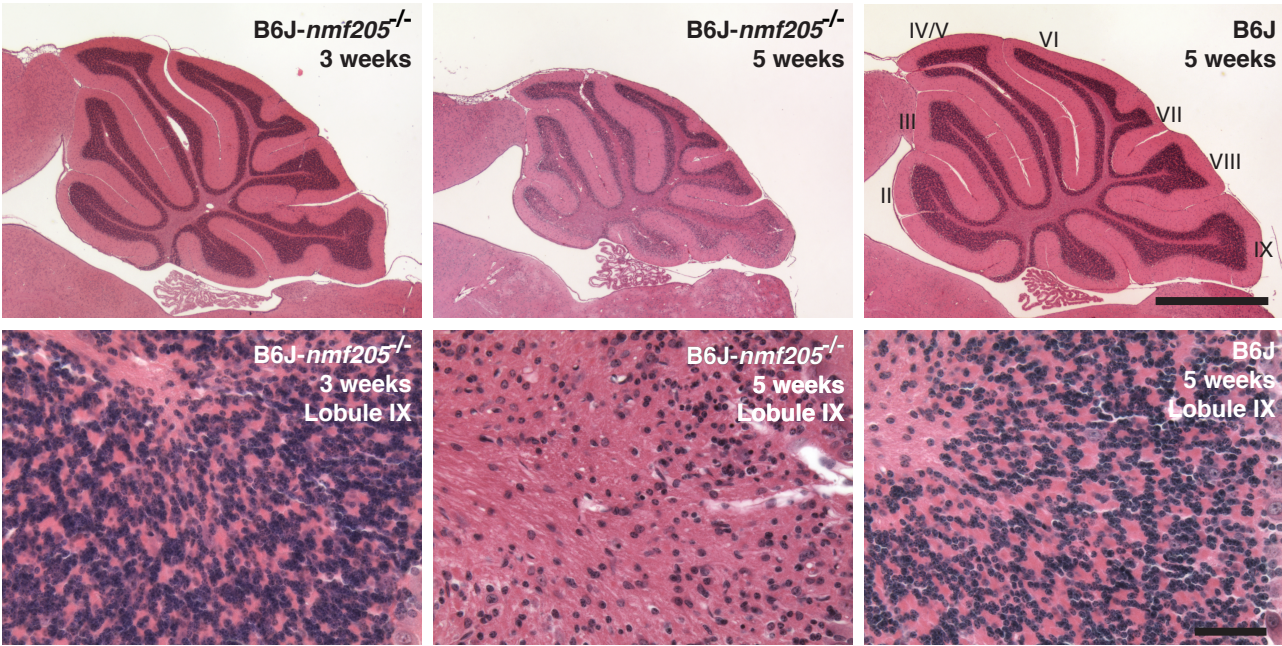

Supplement: supp [file elife_poa_e14295_Figure_1_figure_supplement_1.pdf › elife_poa_e14295_Figure_1_figure_supplement_1.pdf]

Figure 1-figure supplement 2.

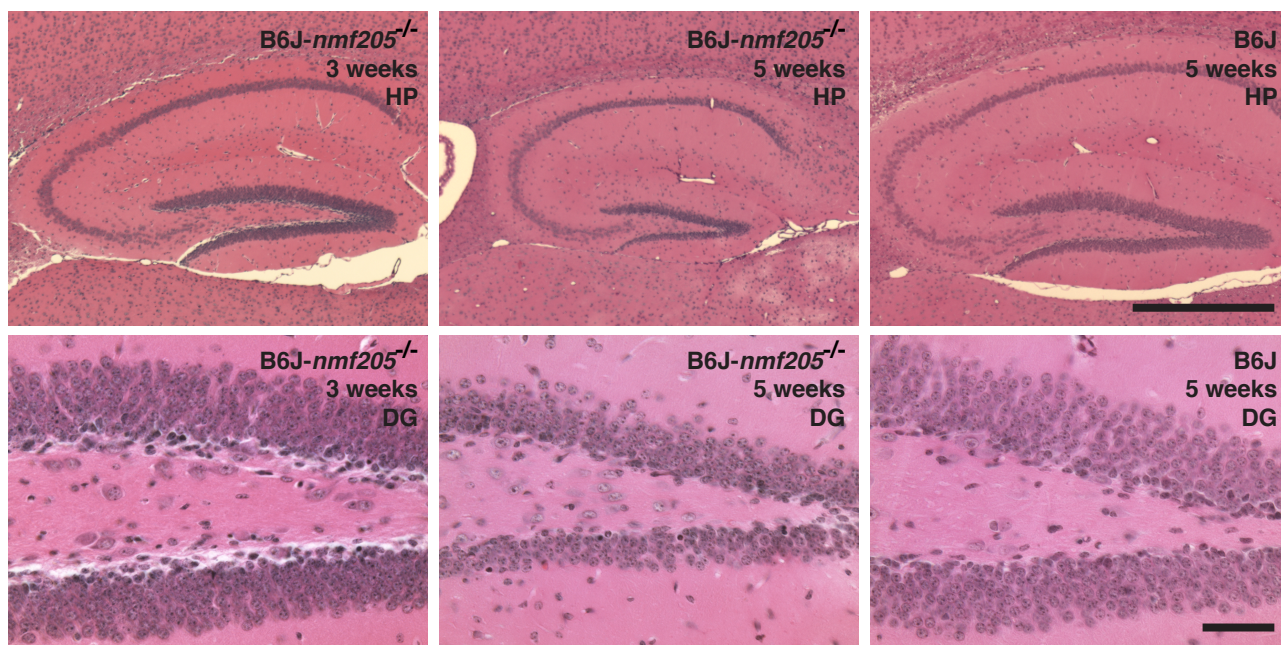

Supplement: supp [file elife_poa_e14295_Figure_1_figure_supplement_2.pdf › elife_poa_e14295_Figure_1_figure_supplement_2.pdf]

Figure 1-figure supplement 3.

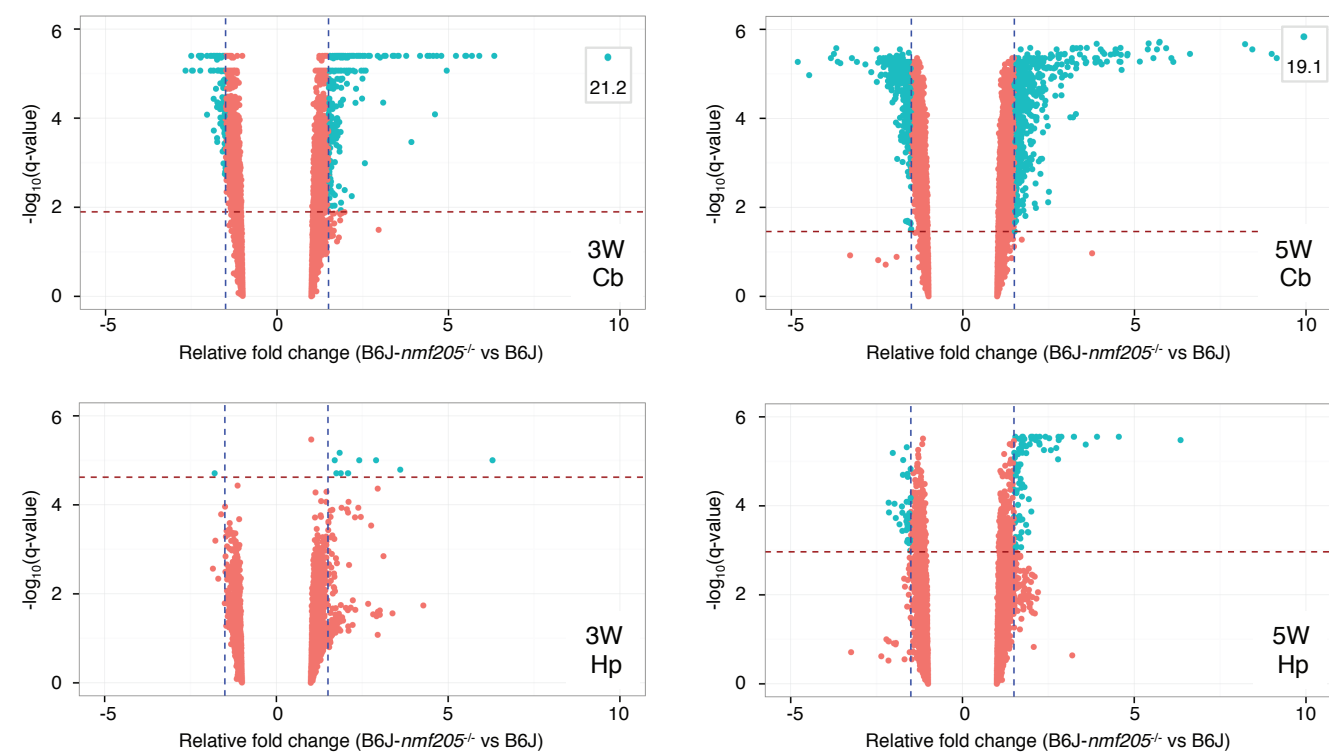

Supplement: supp [file elife_poa_e14295_Figure_1_figure_supplement_3.pdf › elife_poa_e14295_Figure_1_figure_supplement_3.pdf]

Figure 1-figure supplement 4.

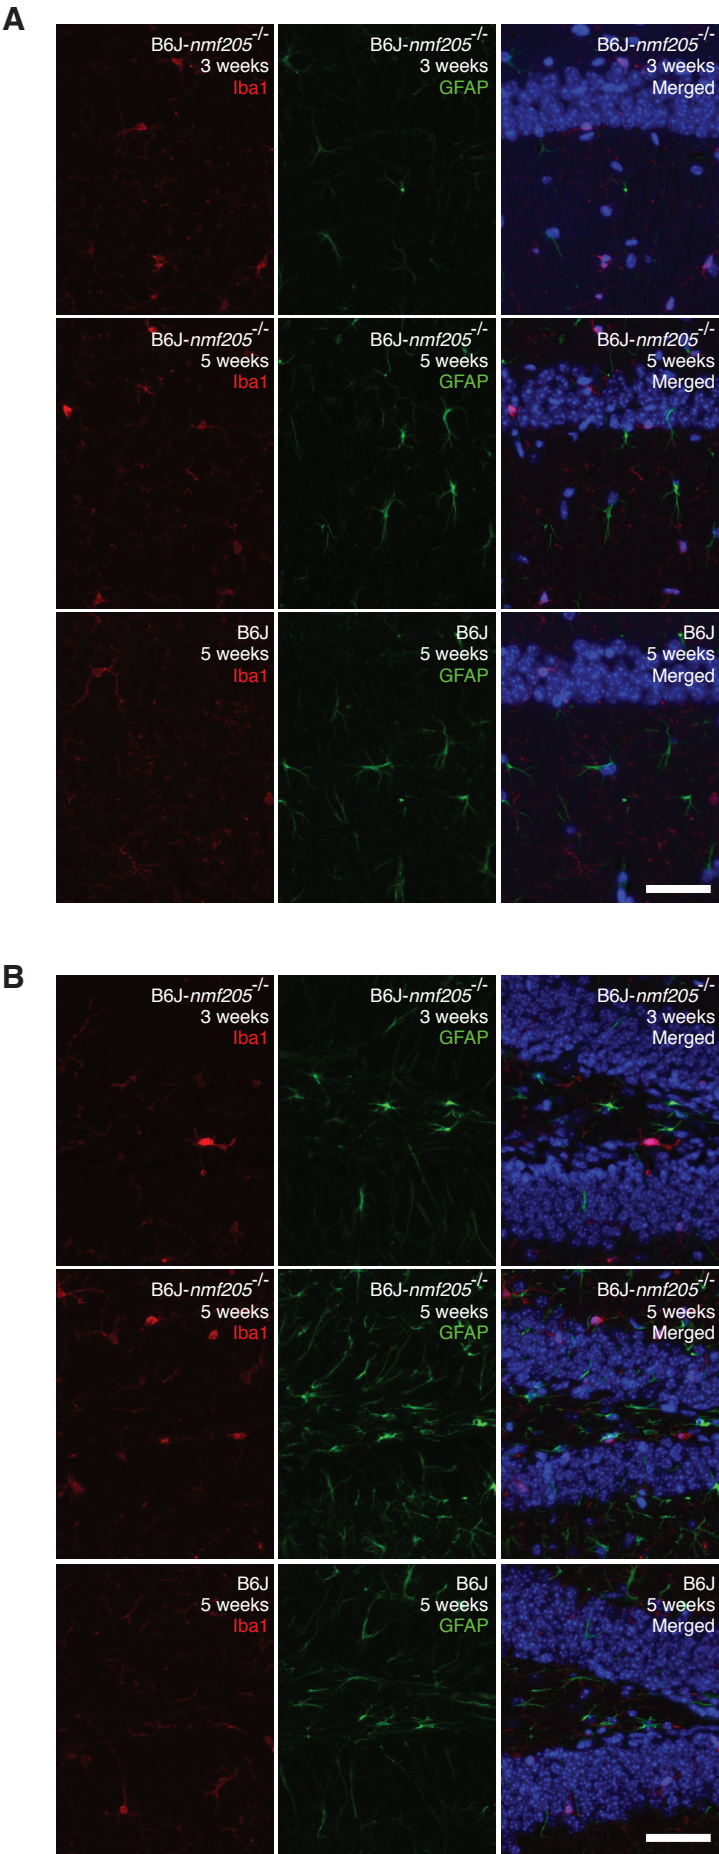

Supplement: supp [file elife_poa_e14295_Figure_1_figure_supplement_4.pdf › elife_poa_e14295_Figure_1_figure_supplement_4.pdf]

Figure 3-figure supplement 1.

**A**

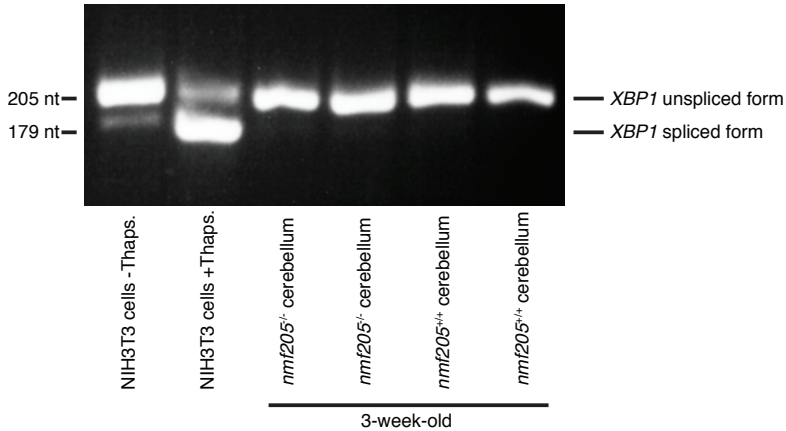

**B**

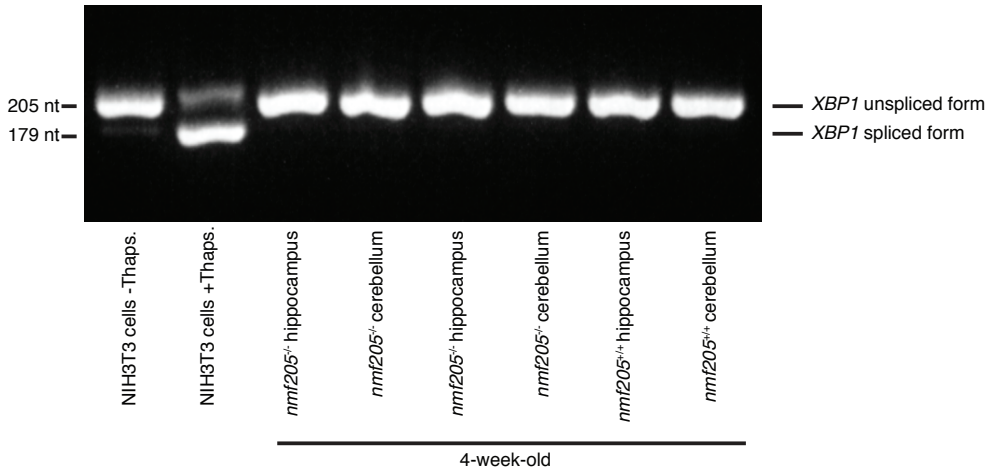

Supplement: supp [file elife_poa_e14295_Figure_3_figure_supplement_1.pdf › elife_poa_e14295_Figure_3_figure_supplement_1.pdf]

Figure 3-figure supplement 2.

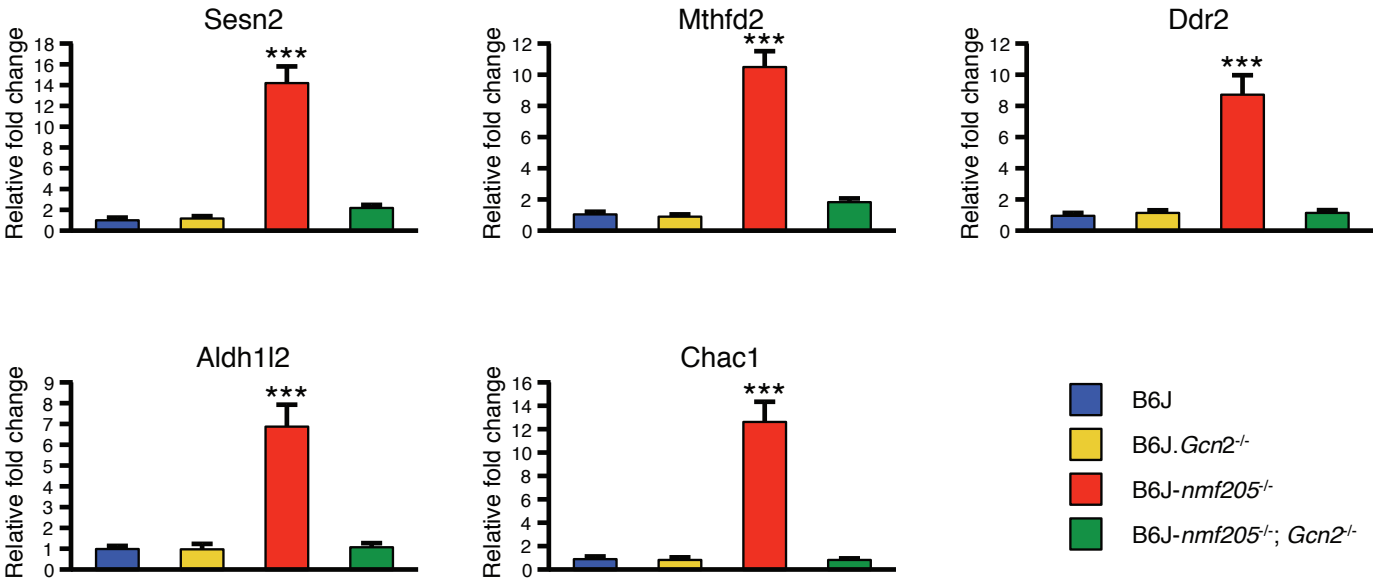

Supplement: supp [file elife_poa_e14295_Figure_3_figure_supplement_2.pdf › elife_poa_e14295_Figure_3_figure_supplement_2.pdf]

Figure 3-figure supplement 3.

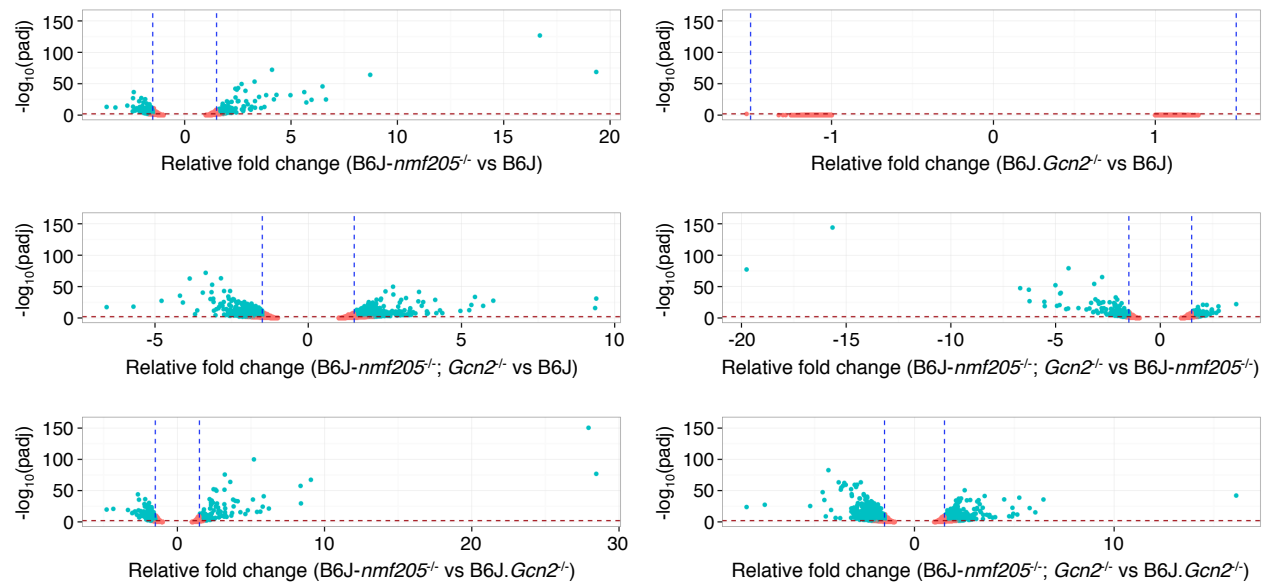

Supplement: supp [file elife_poa_e14295_Figure_3_figure_supplement_3.pdf › elife_poa_e14295_Figure_3_figure_supplement_3.pdf]

Figure 3-figure supplement 4.

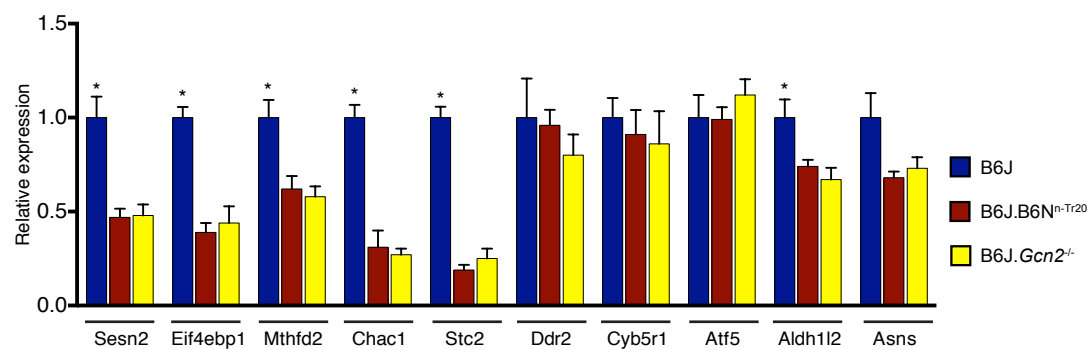

Supplement: supp [file elife_poa_e14295_Figure_3_figure_supplement_4.pdf › elife_poa_e14295_Figure_3_figure_supplement_4.pdf]

Figure 4-figure supplement 1.

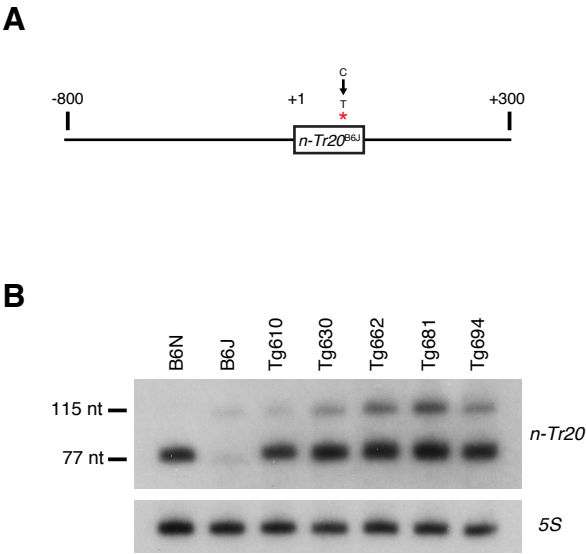

Supplement: supp [file elife_poa_e14295_Figure_4_figure_supplement_1.pdf › elife_poa_e14295_Figure_4_figure_supplement_1.pdf]

Figure 4-figure supplement 2.

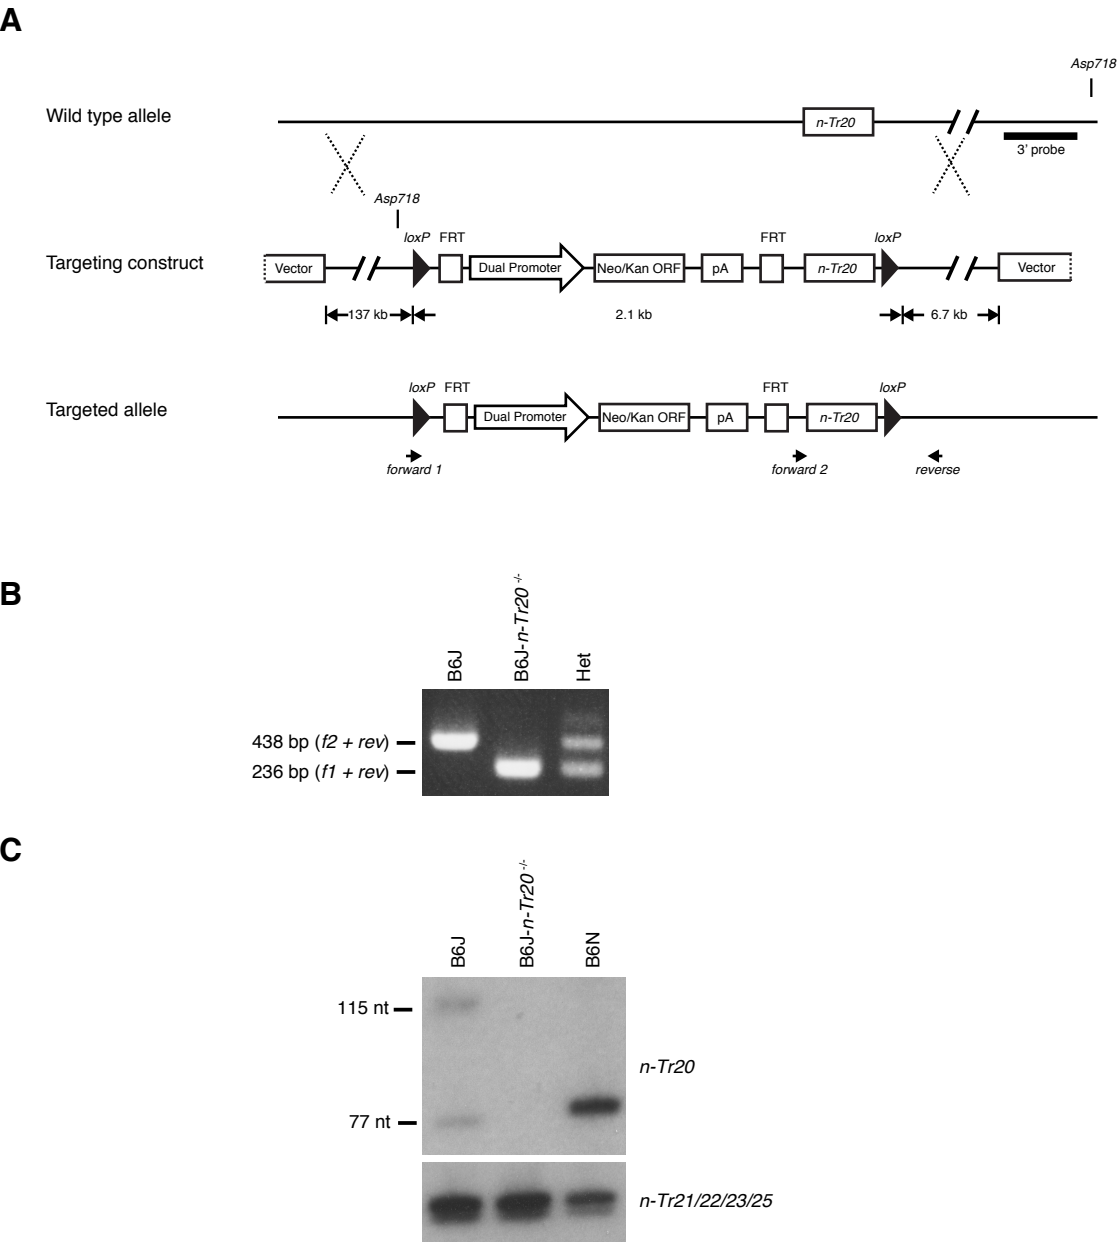

Supplement: supp [file elife_poa_e14295_Figure_4_figure_supplement_2.pdf › elife_poa_e14295_Figure_4_figure_supplement_2.pdf]
